# Supplementary material for: Postoperative Analgesic Effectiveness of Peripheral Nerve Blocks in Cesarean Delivery: A Systematic Review and Network Meta-Analysis
Source: MDPI journal article supplement (doi:10.3390/jpm12040634), 2022-04-14
Supplement: s1 [file s1]

# Supplementary Materials

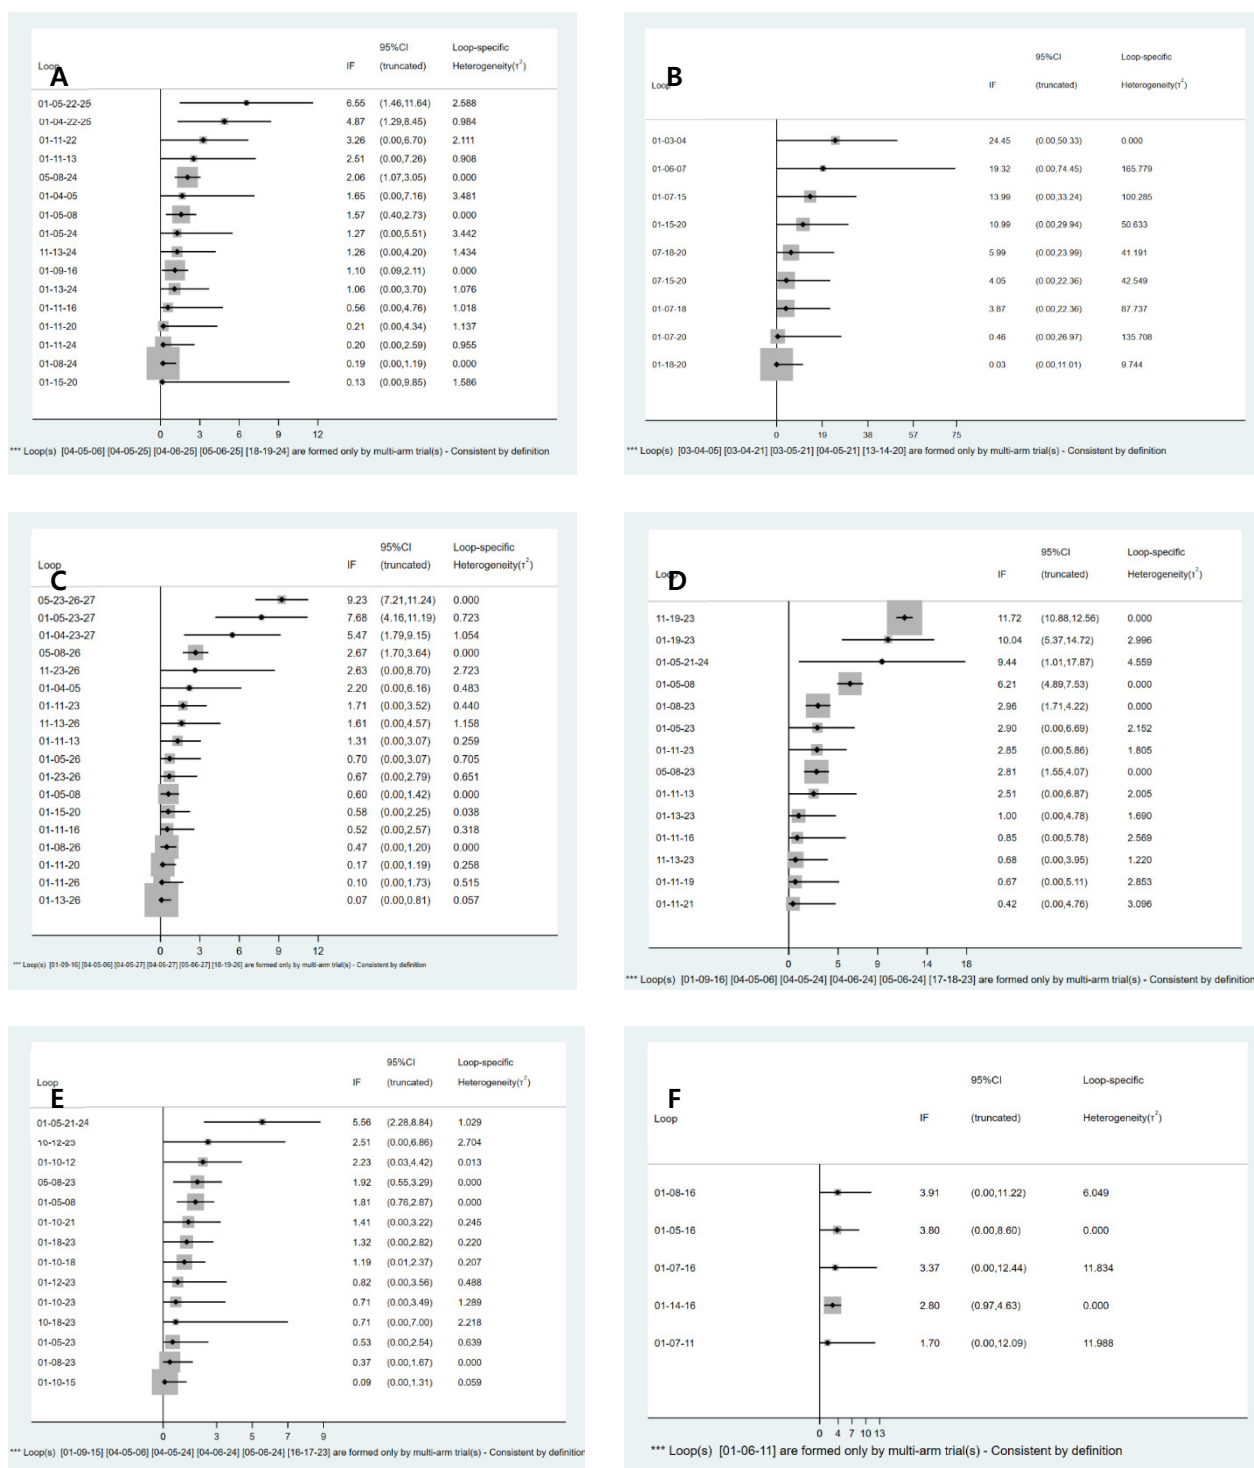

**Figure S1.** Inconsistency plots of direct and indirect comparisons for the entire network. Triangular loops are formed by three interventions all compared with each other and quadratic loops are formed by four interventions that each one is compared exactly with two other interventions in the loop. Inconsistency factor (IF) means the absolute difference between direct and indirect estimates for each paired comparison in the loop. (A). Pain at rest 6 h after surgery, (B). Postoperative cumulative 24 h morphine equivalent consumption, (C). Pain at rest 24 h after surgery, (D). Dynamic pain at 6 h after surgery, (E). Dynamic pain at 24 h after surgery, (F). The time to first analgesic request.

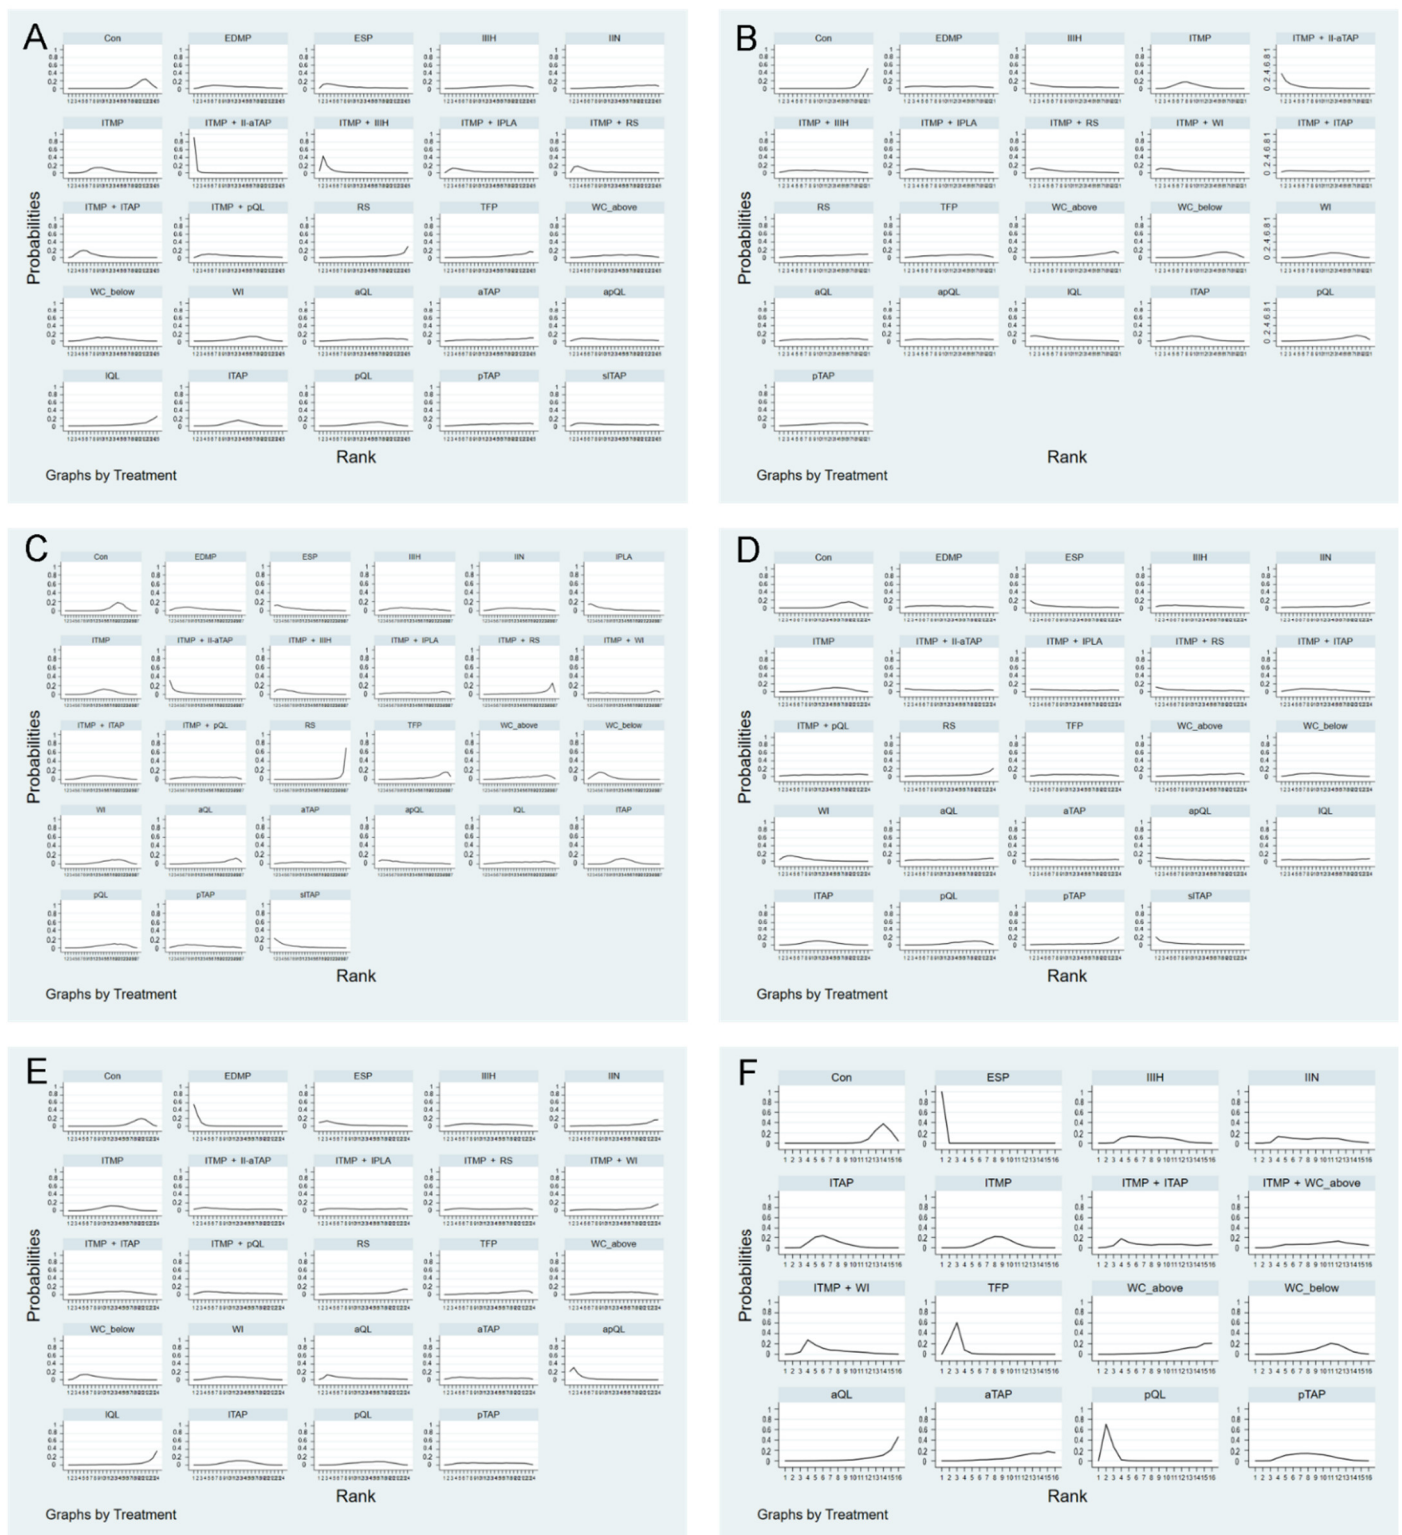

**Figure S2.** The rankograms of all outcomes. A rankogram for each specific intervention is a plot of the probability of assuming each of the possible rank. Each number on the X-axis means the possible rank among the total number of interventions in each network. (A). Pain at rest 6 h after surgery, (B). Postoperative cumulative 24 h morphine equivalent consumption, (C). Pain at rest 24 h after surgery, (D). Dynamic pain at 6 h after surgery, (E). Dynamic pain at 24 h after surgery, (F). The time to first analgesic request.

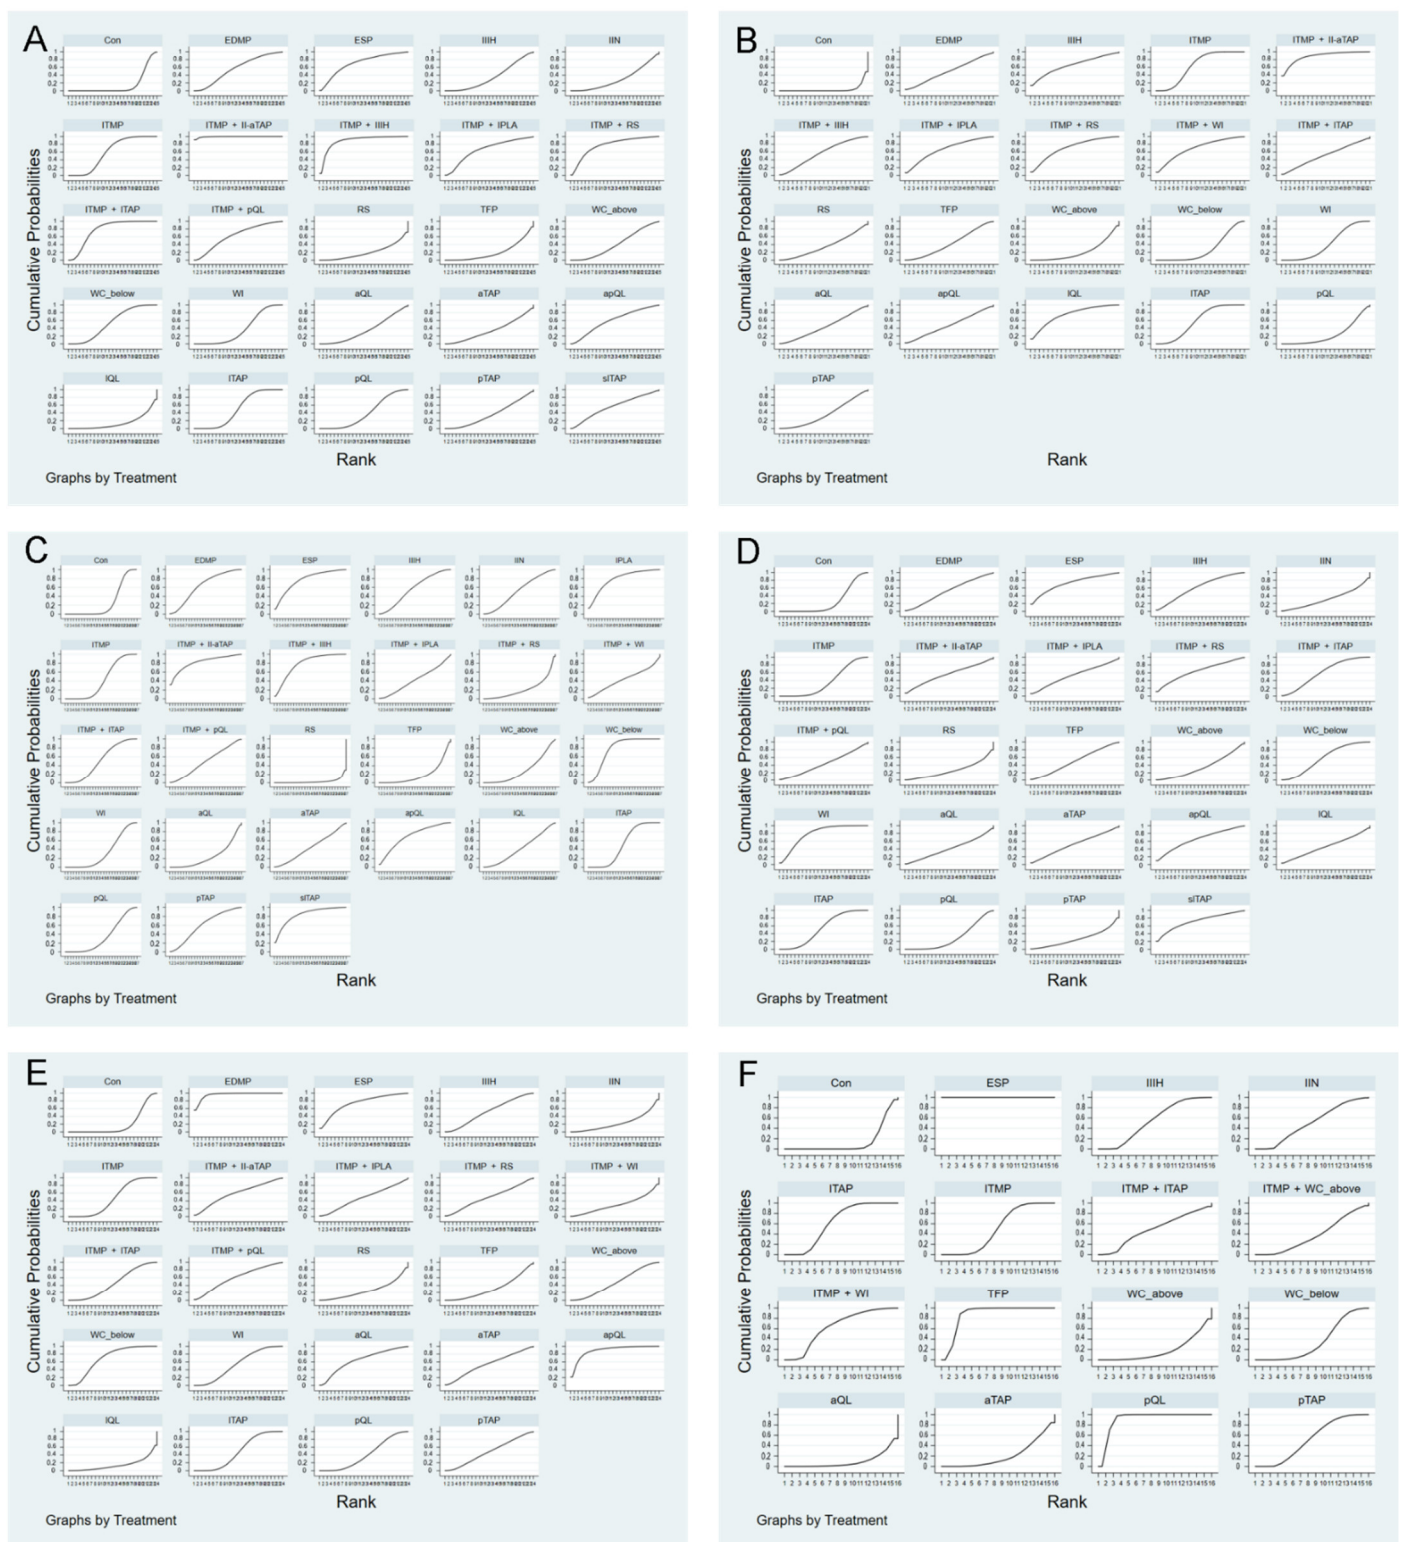

**Figure S3.** The cumulative ranking curves of all outcomes. Each one present the cumulative ranking probability. The numbers on the X-axis are the possible rank of each intervention and the numbers on the Y-axis mean the cumulative probability for each intervention to be the best option, among the two options, three options, and so on. (A). Pain at rest 6 h after surgery, (B). Postoperative cumulative 24 h morphine equivalent consumption, (C). Pain at rest 24 h after surgery, (D). Dynamic pain at 6 h after surgery, (E). Dynamic pain at 24 h after surgery, (F). The time to first analgesic request.

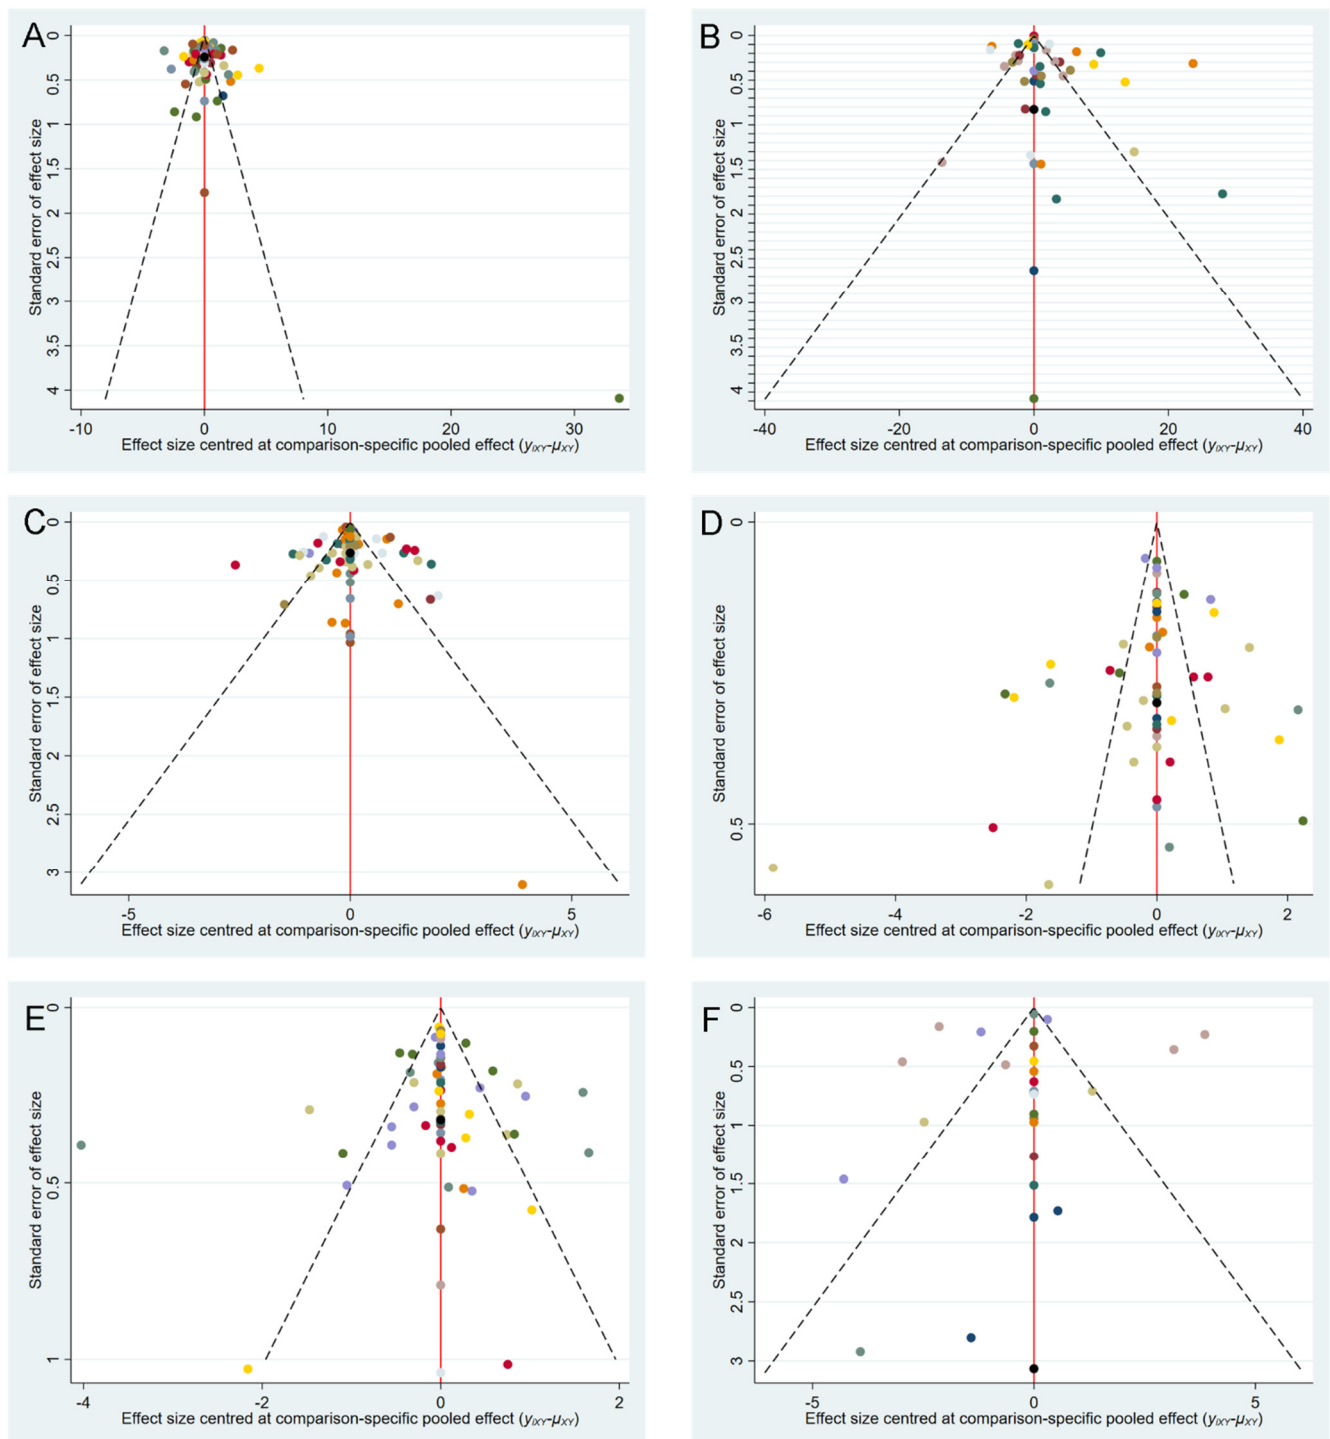

**Figure S4.** Comparison-adjusted funnel plots. The red line means the null hypothesis that the study-specific effect sizes are not different with the respective comparison-specific pooled effect estimates. In the presence of small study effects, the plot is asymmetric around the red line. (A). Pain at rest 6 h after surgery, (B). Postoperative cumulative 24 h morphine equivalent consumption, (C). Pain at rest 24 h after surgery, (D). Dynamic pain at 6 h after surgery, (E). Dynamic pain at 24 h after surgery, (F). The time to first analgesic request.

(A) Trace plot and density plot in fixed effect model.

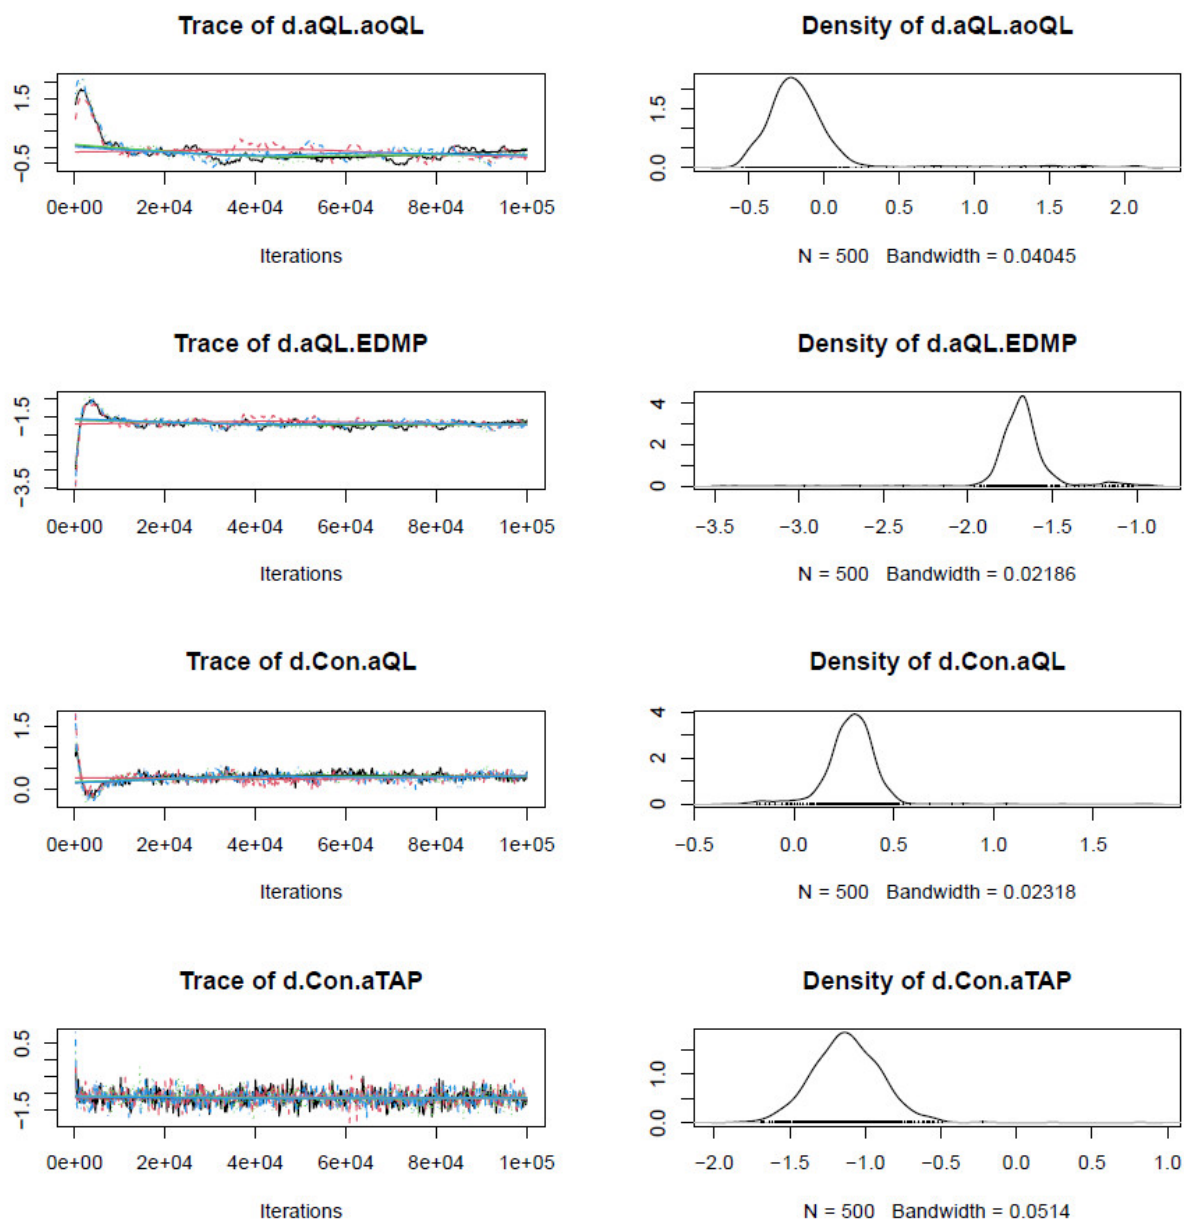

Figure S5. Cont.

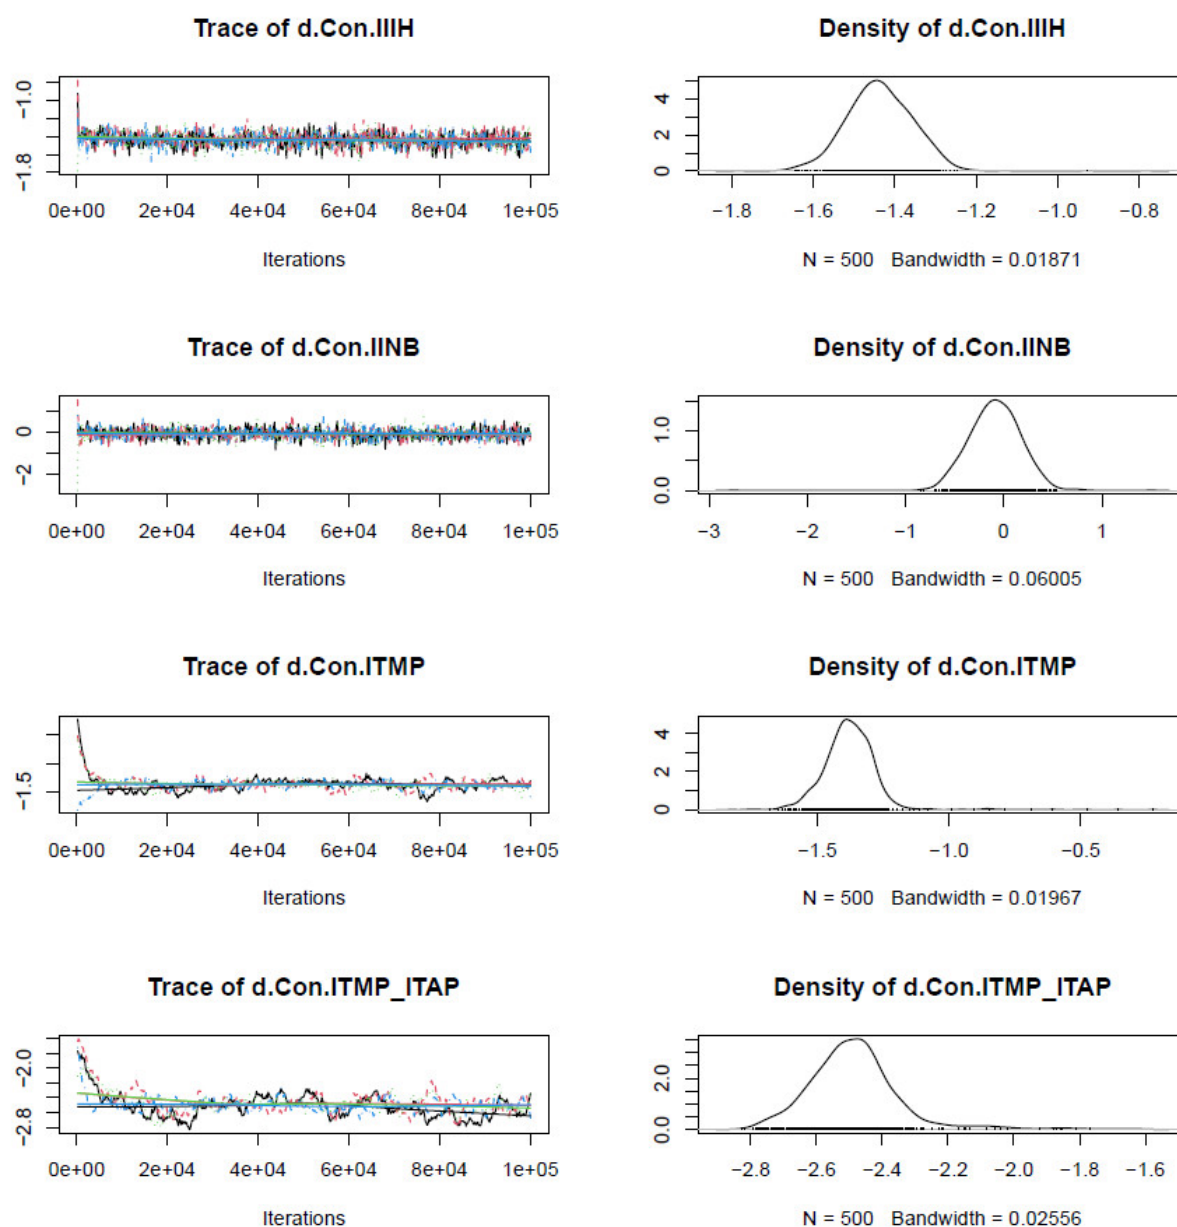

Figure S5. Cont.

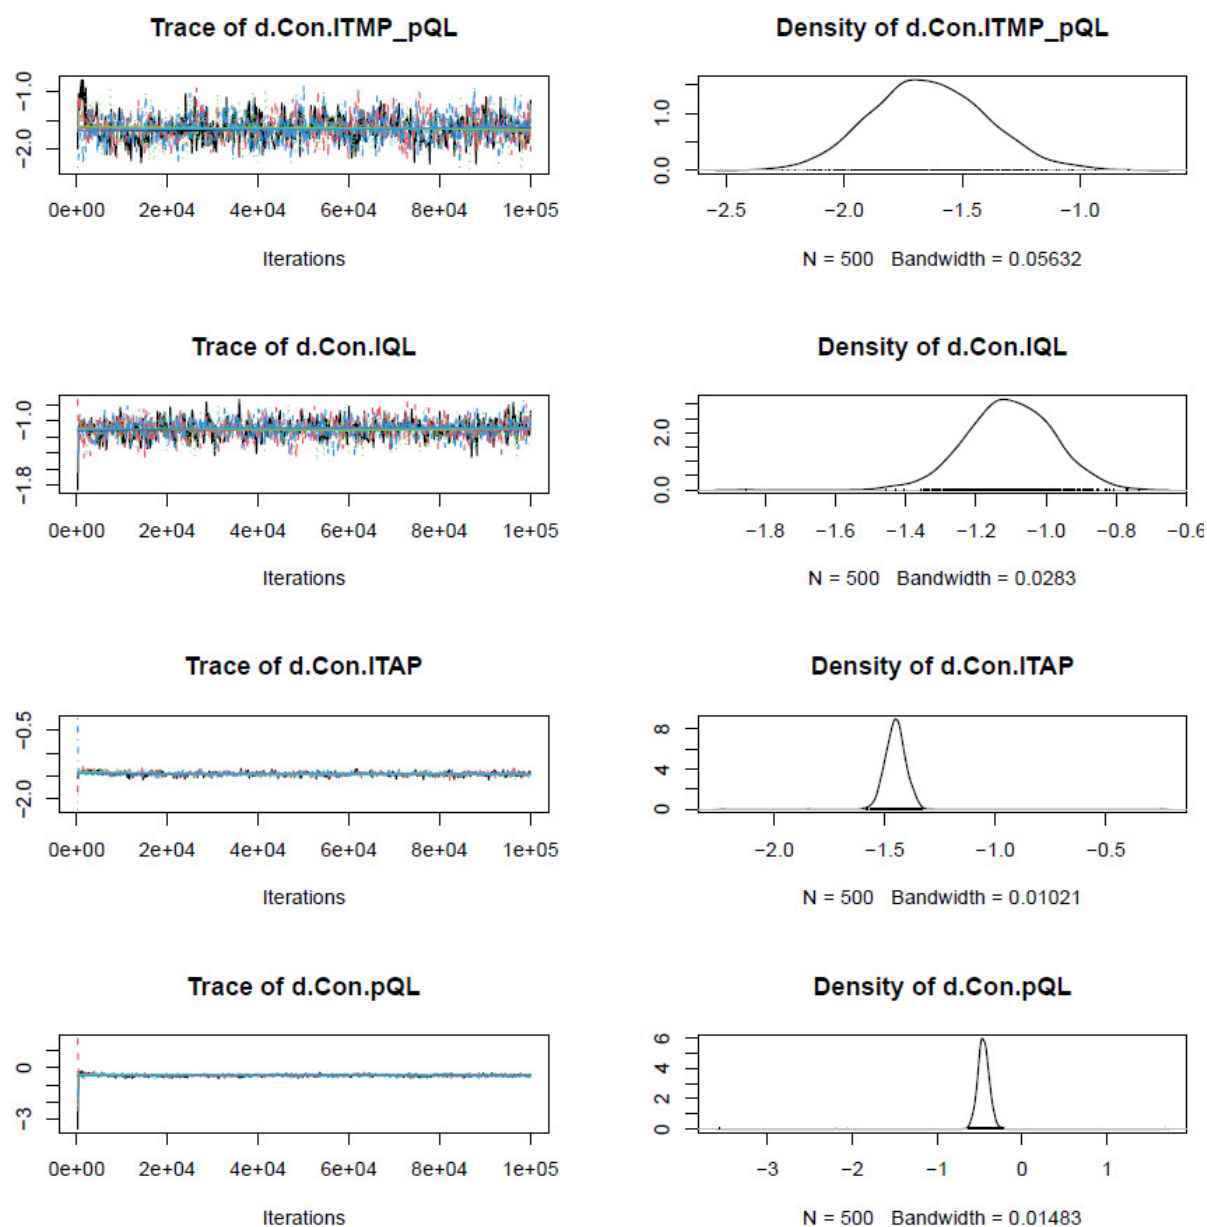

Figure S5. Cont.

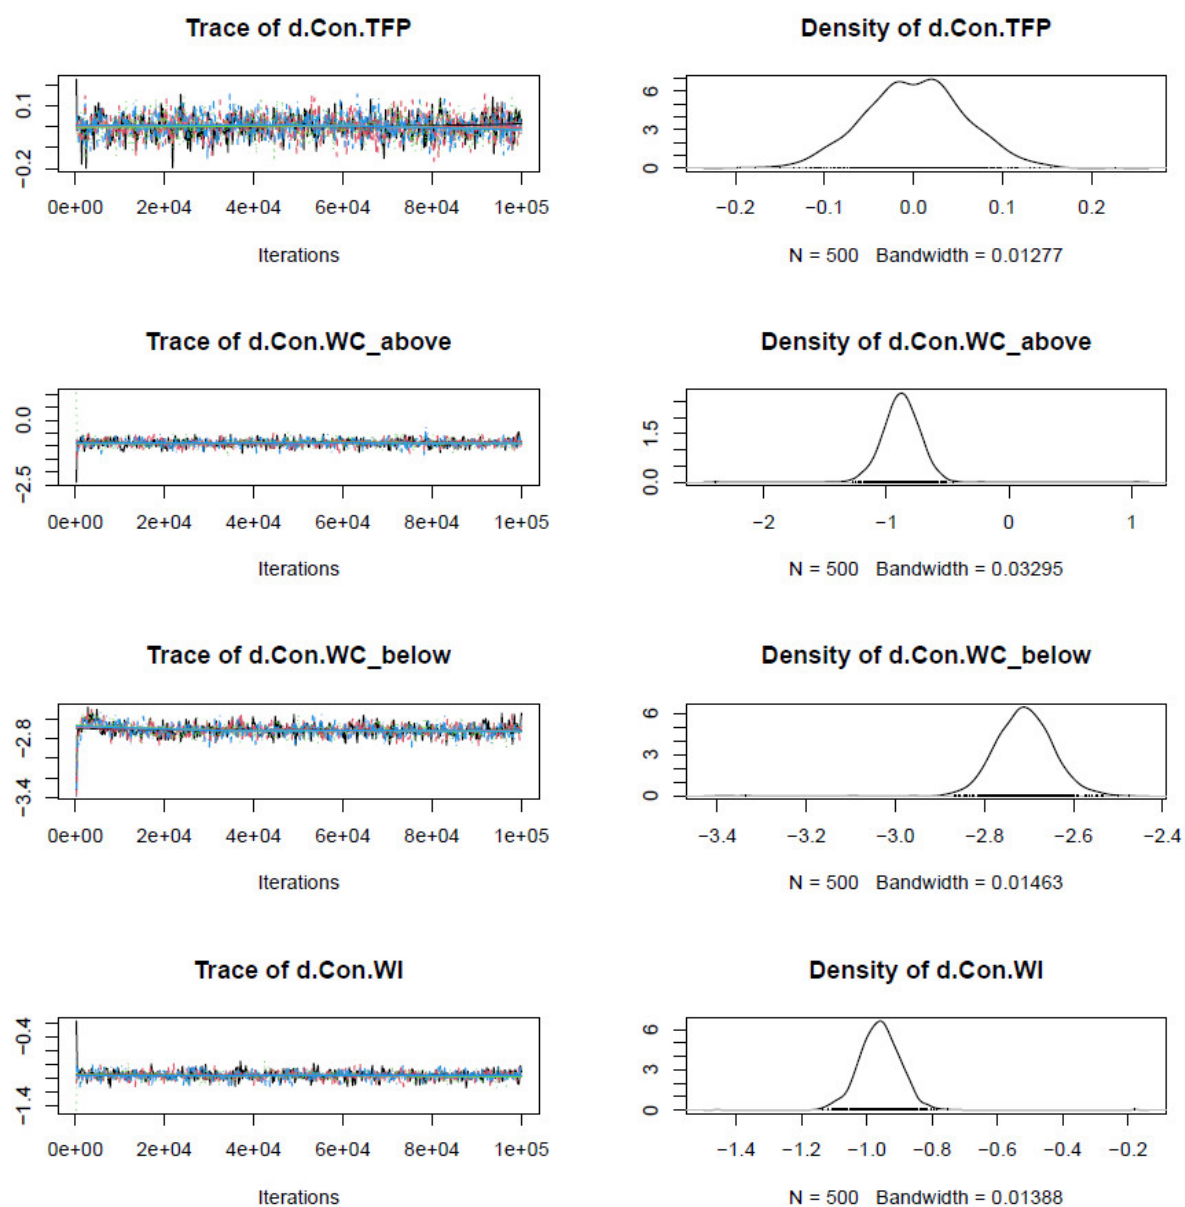

Figure S5. Cont.

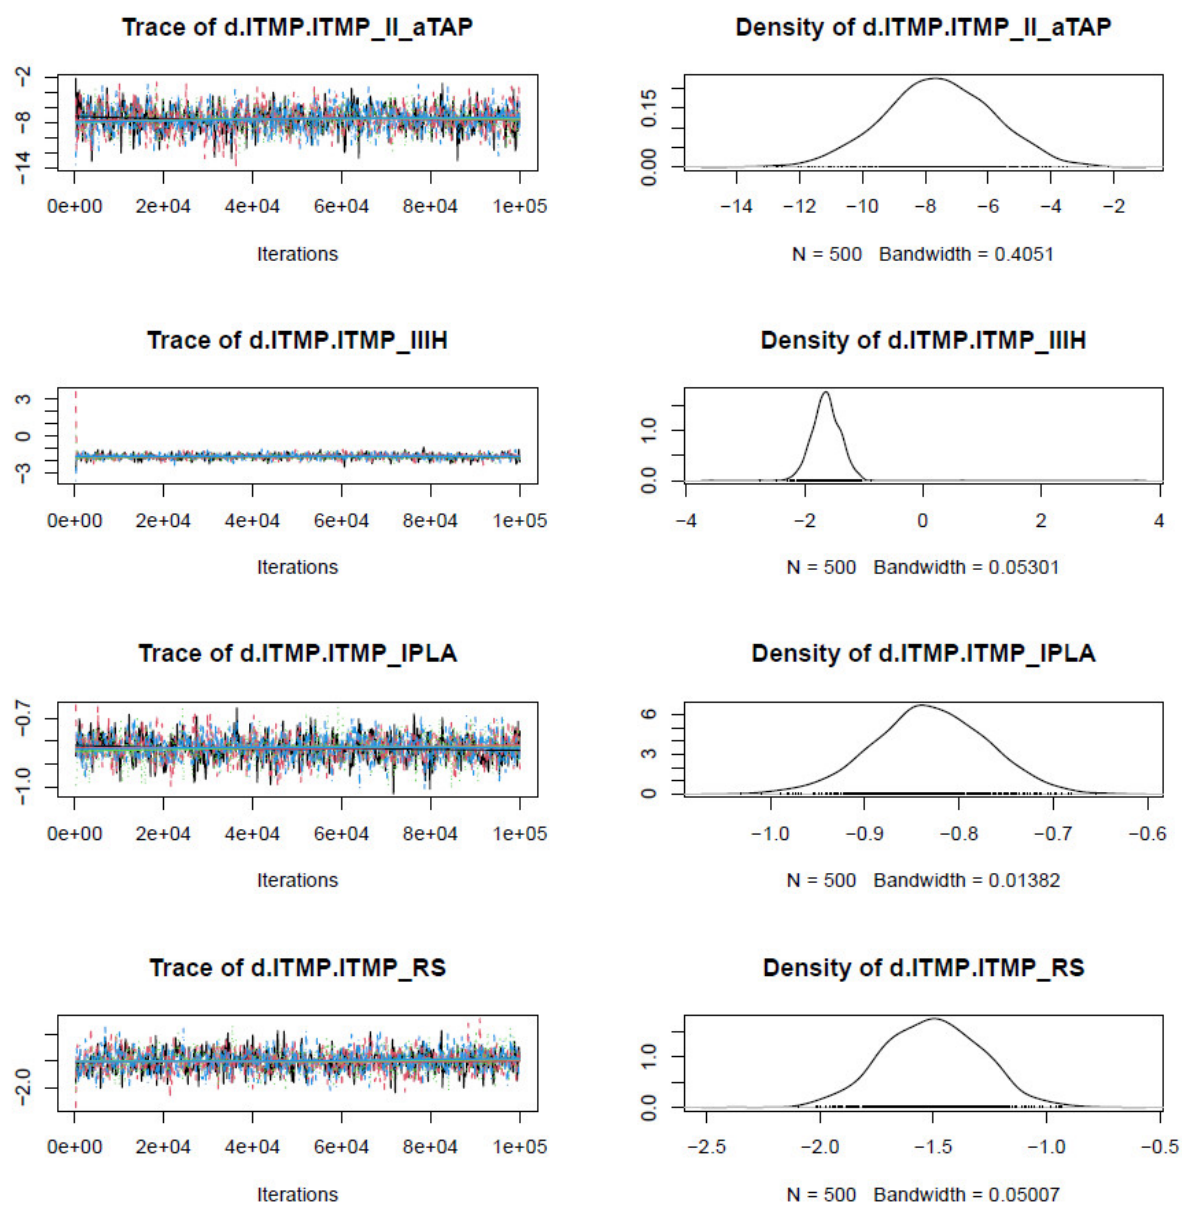

Figure S5. Cont.

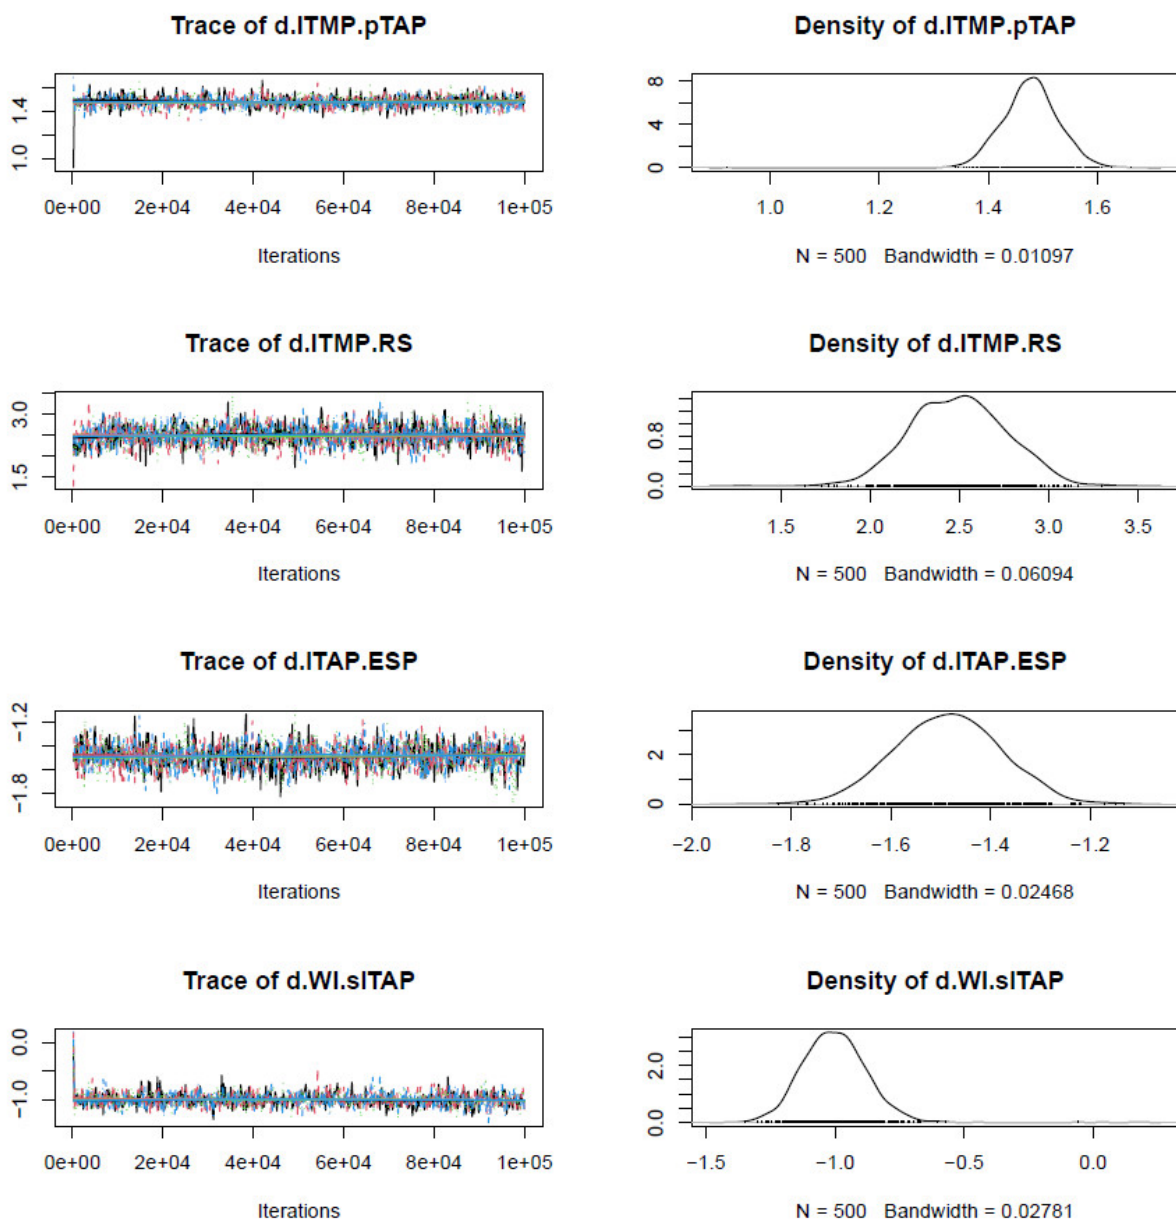

Figure S5. Cont.

(B) Trace plot and density plot in random effect model.

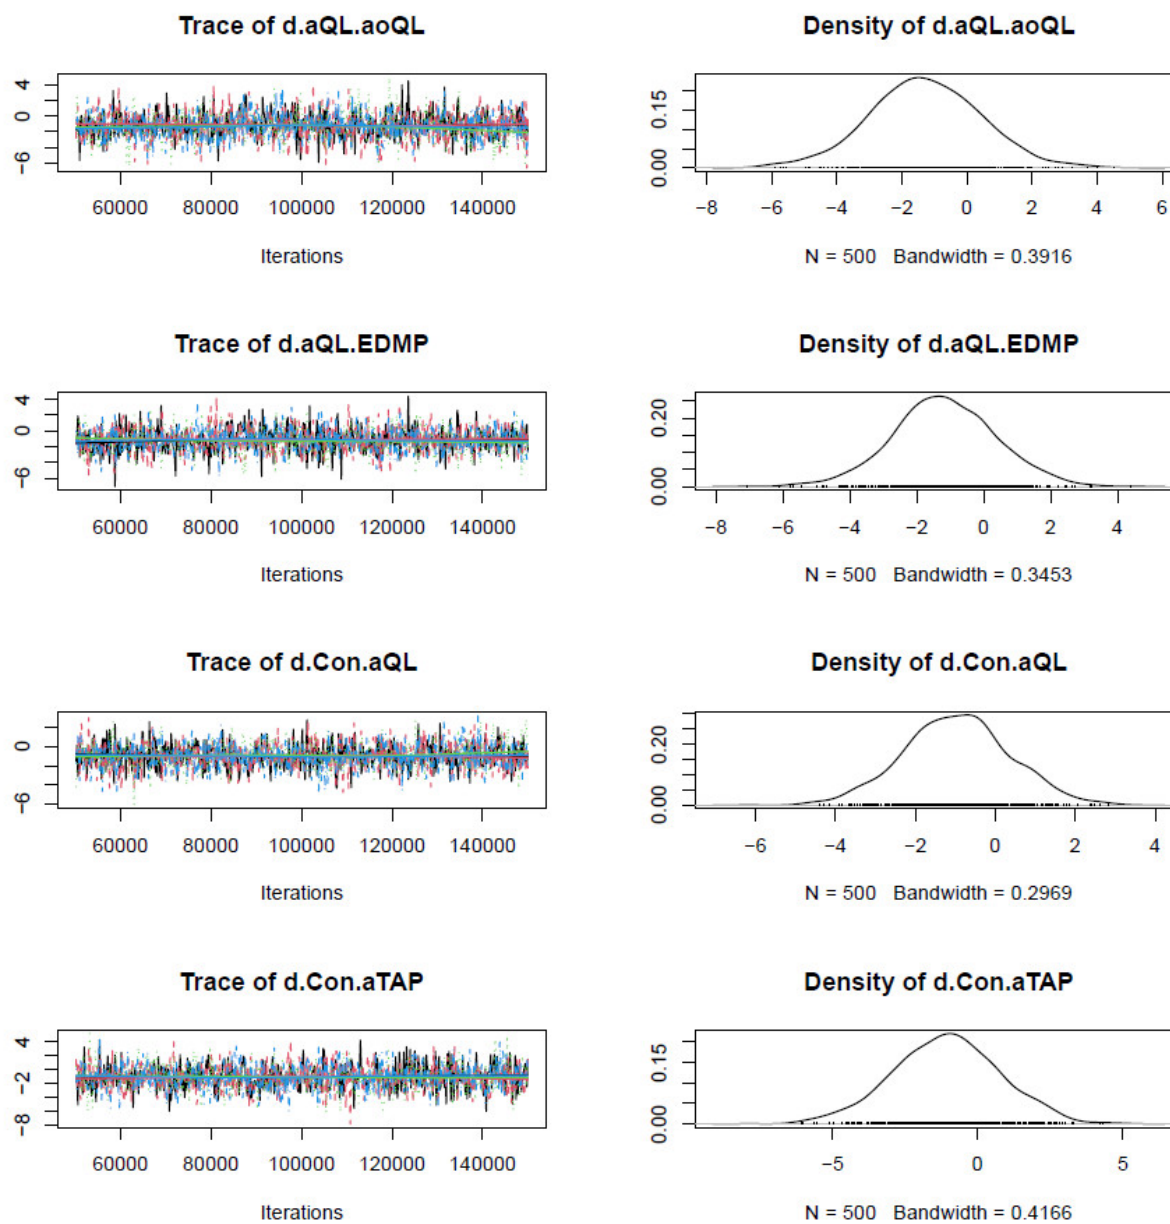

Figure S5. Cont.

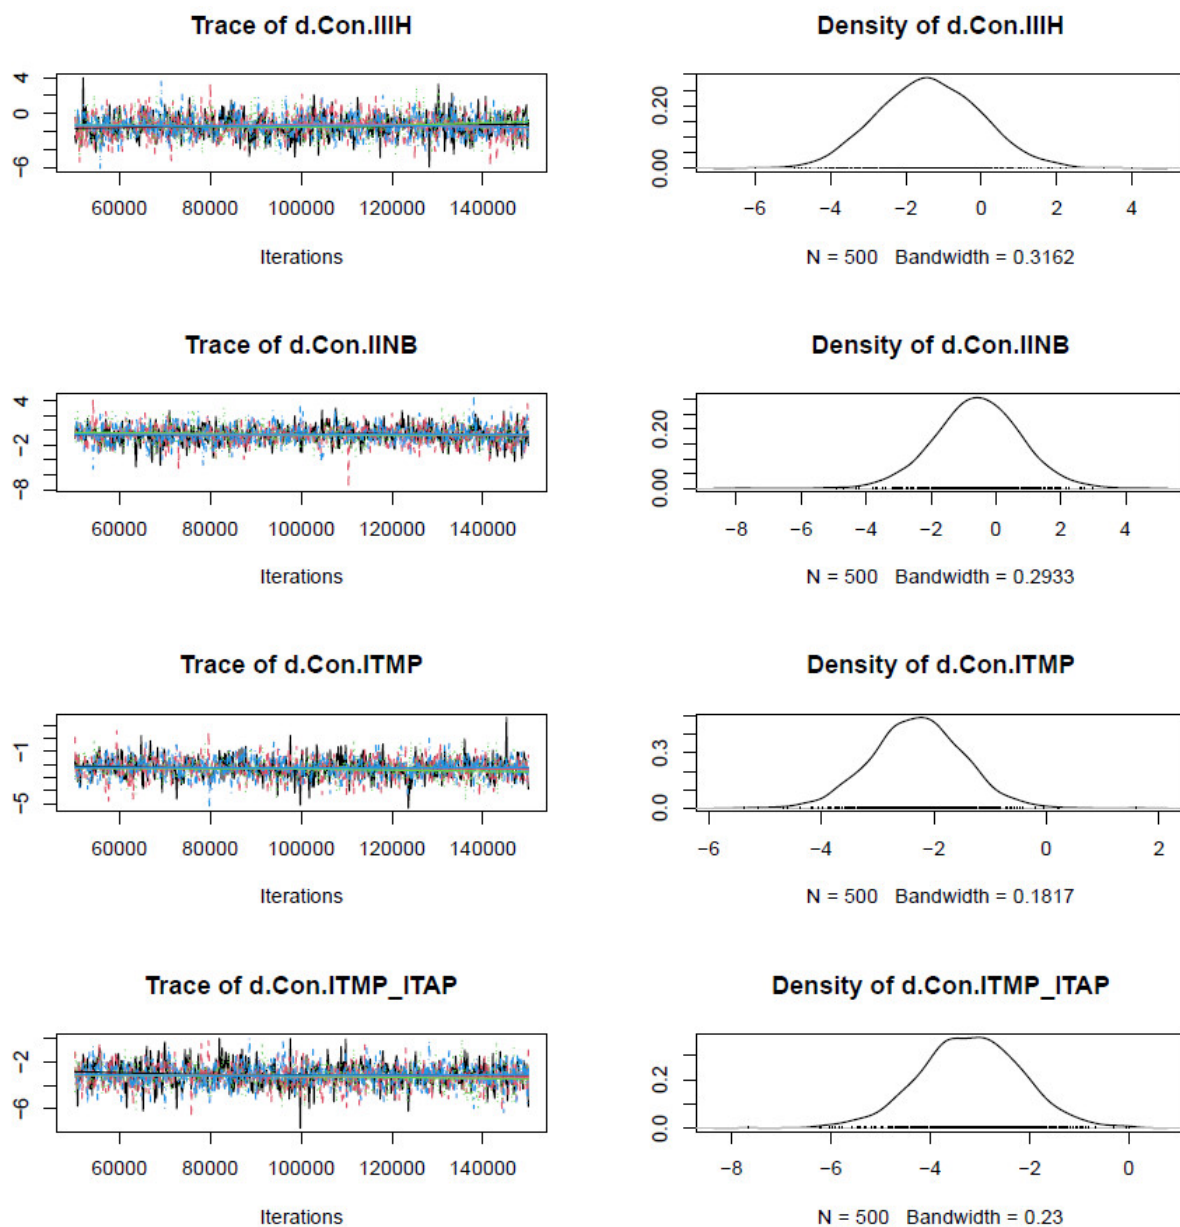

Figure S5. Cont.

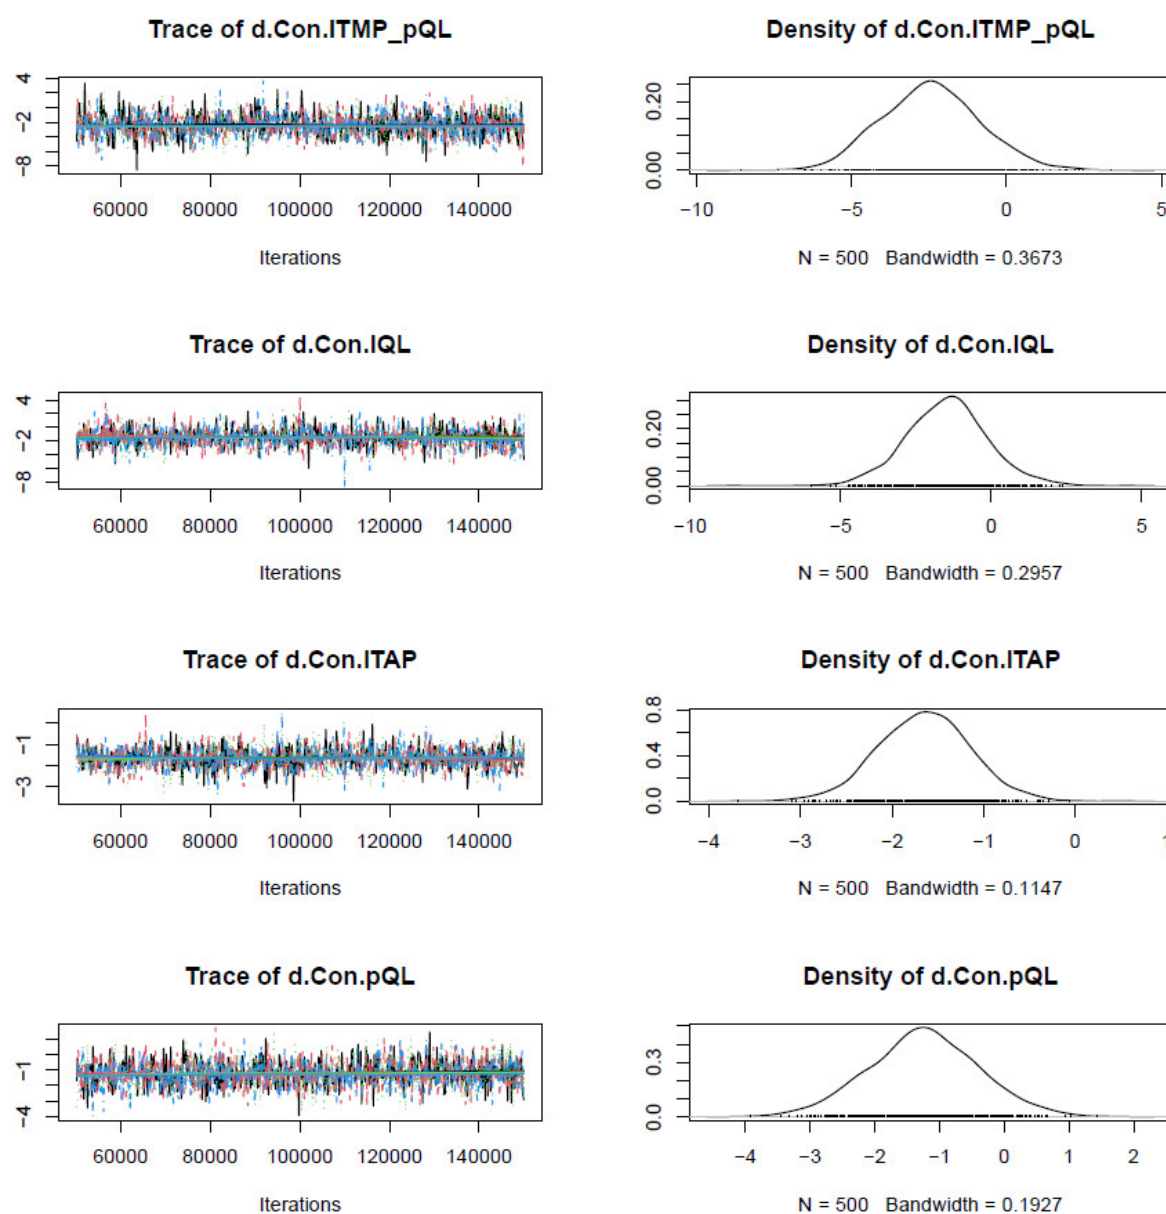

Figure S5. Cont.

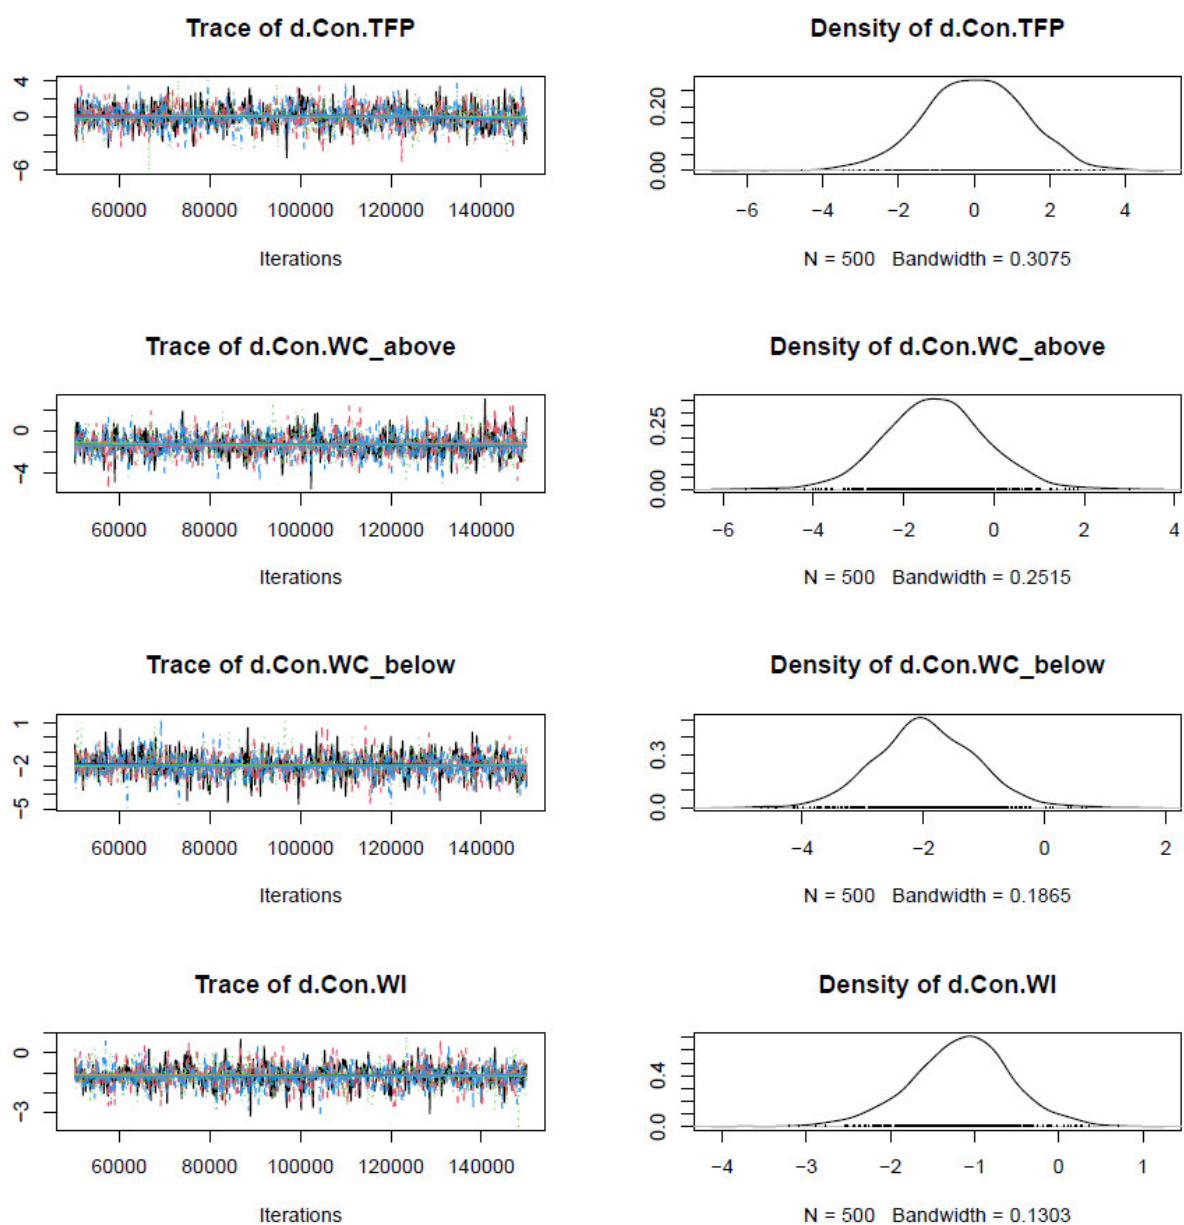

Figure S5. Cont.

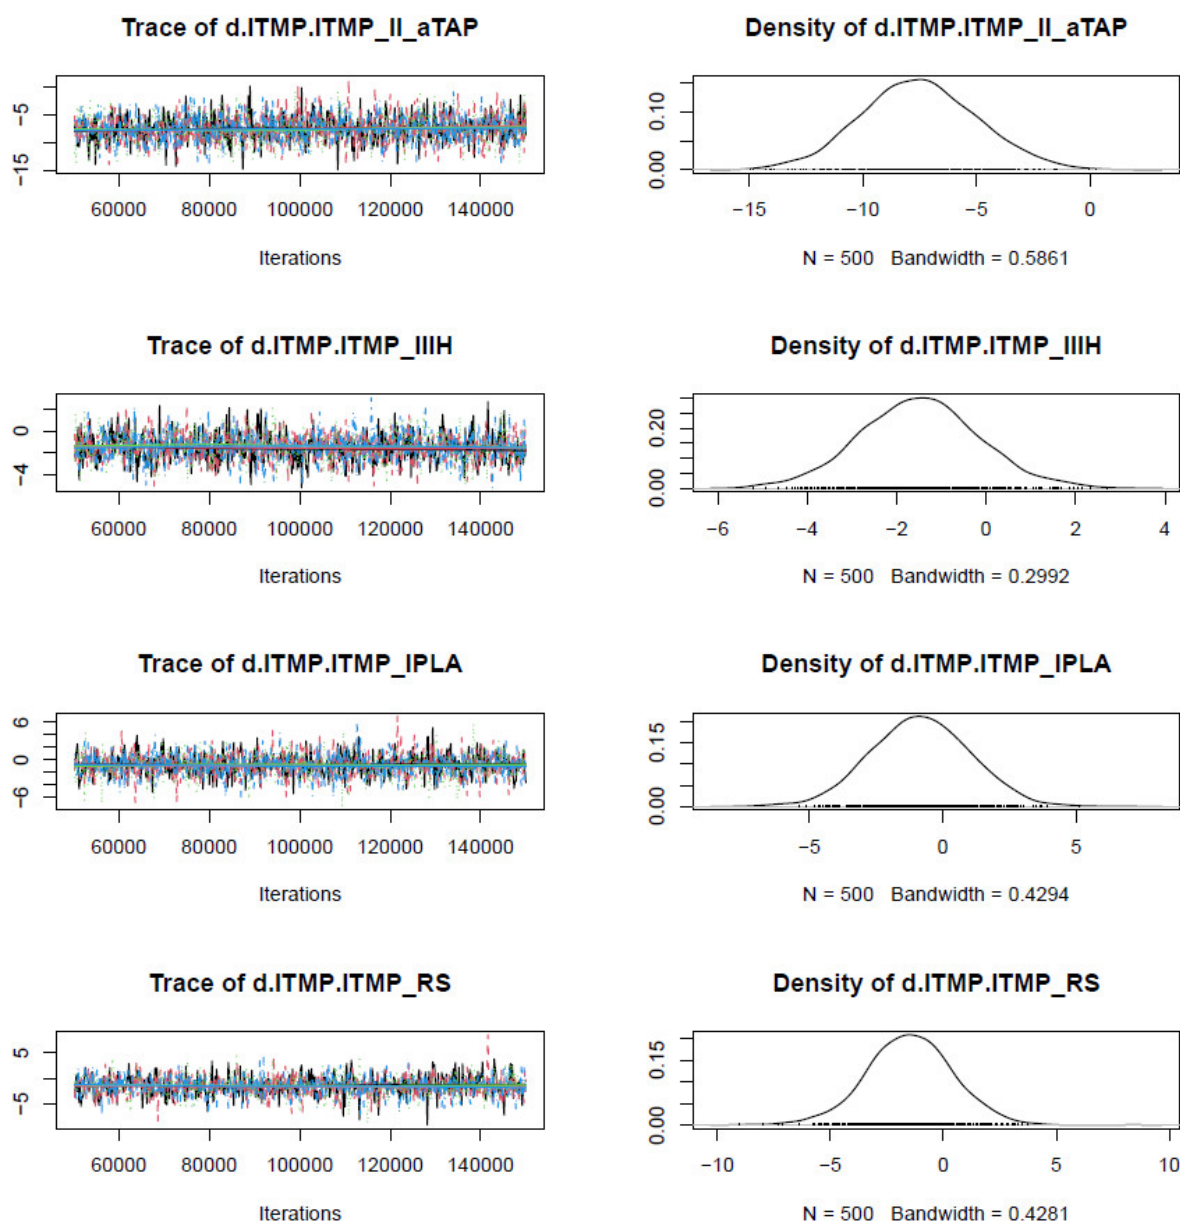

Figure S5. Cont.

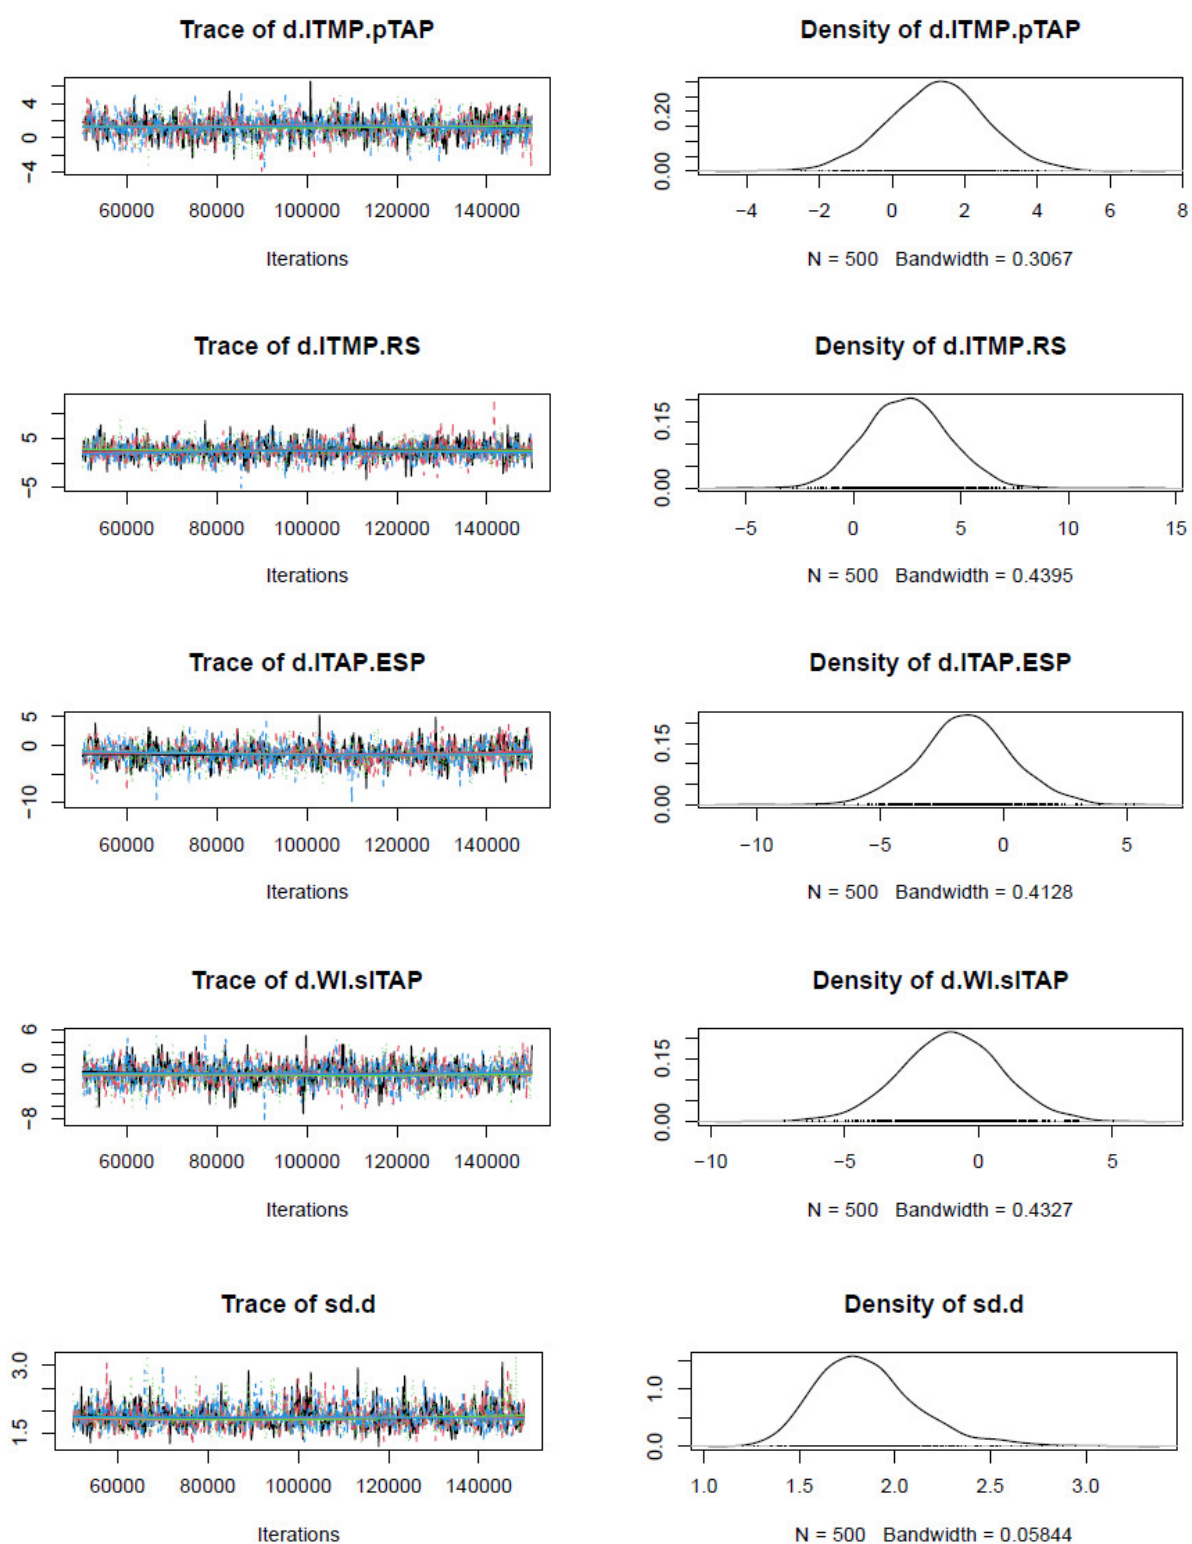

Figure S5. Cont.

(C) Gelman-Rubin-Brooks plot in fixed effect model.

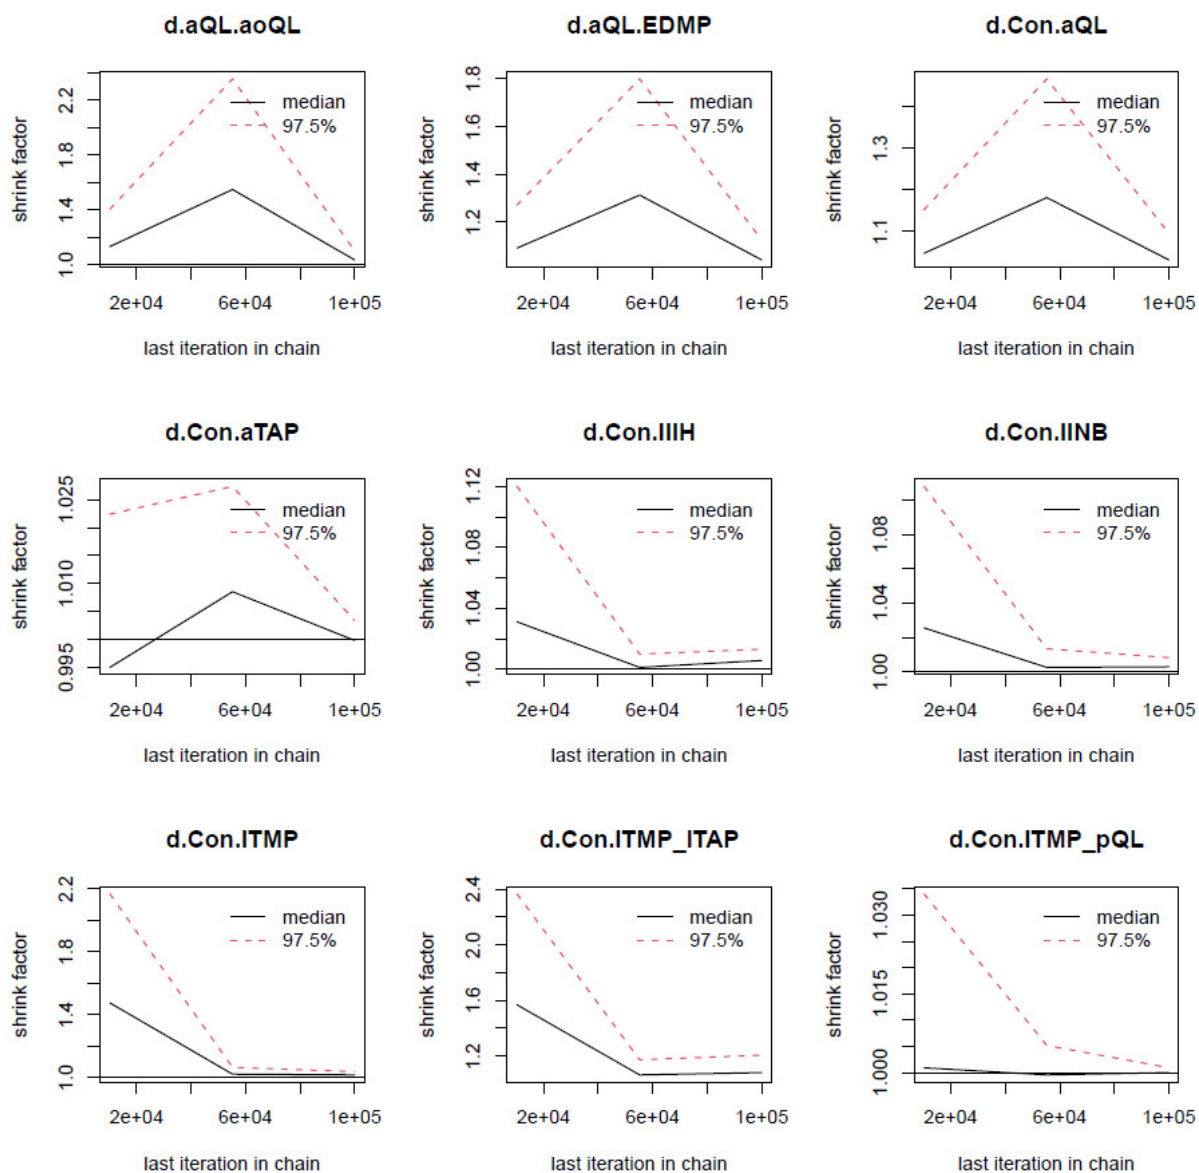

Figure S5. Cont.

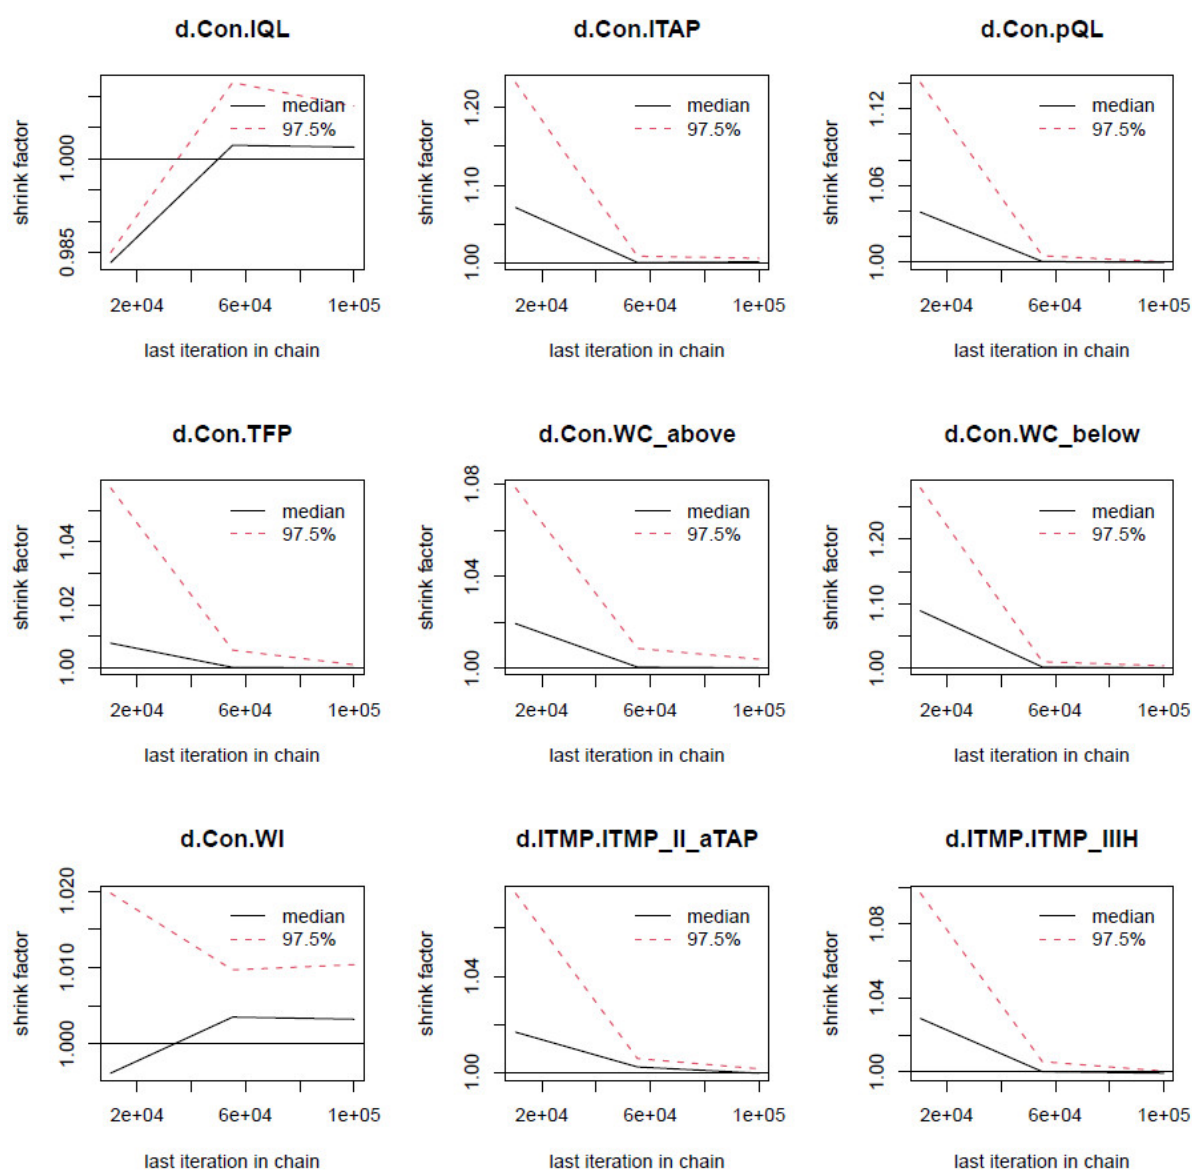

Figure S5. Cont.

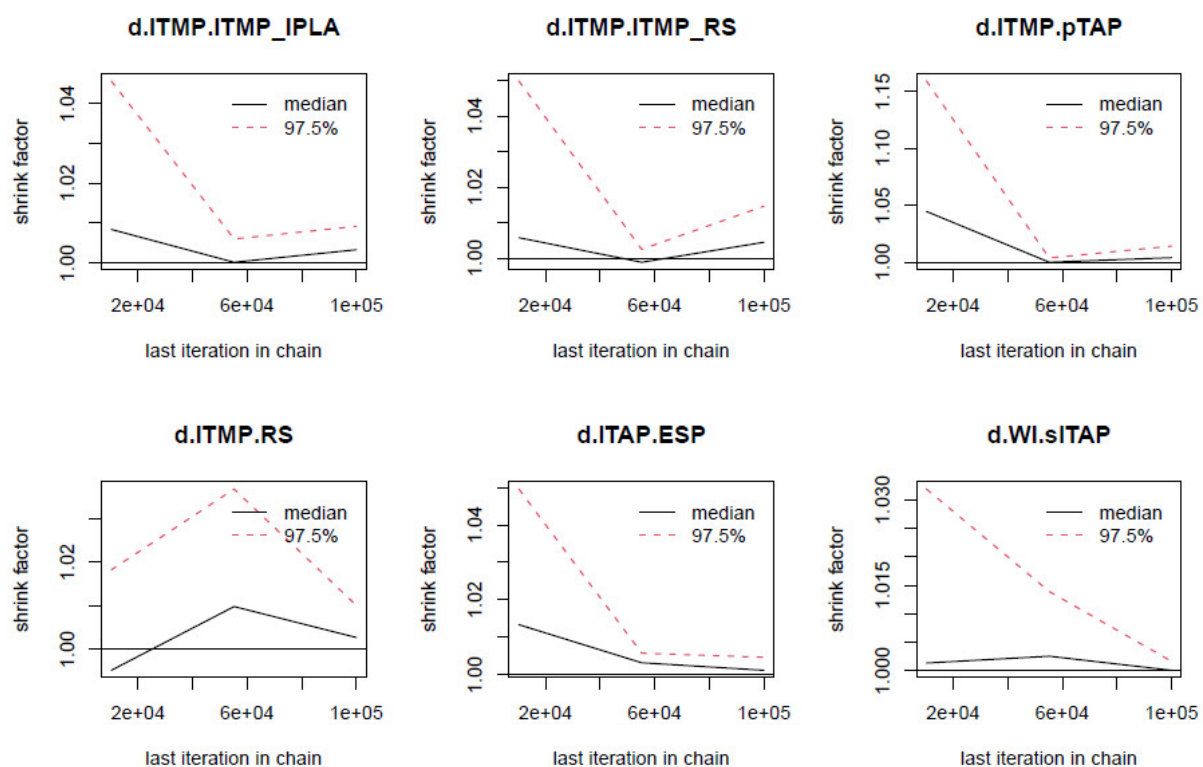

Figure S5. Cont.

(D) Gelman-Rubin-Brooks plot in random effect model.

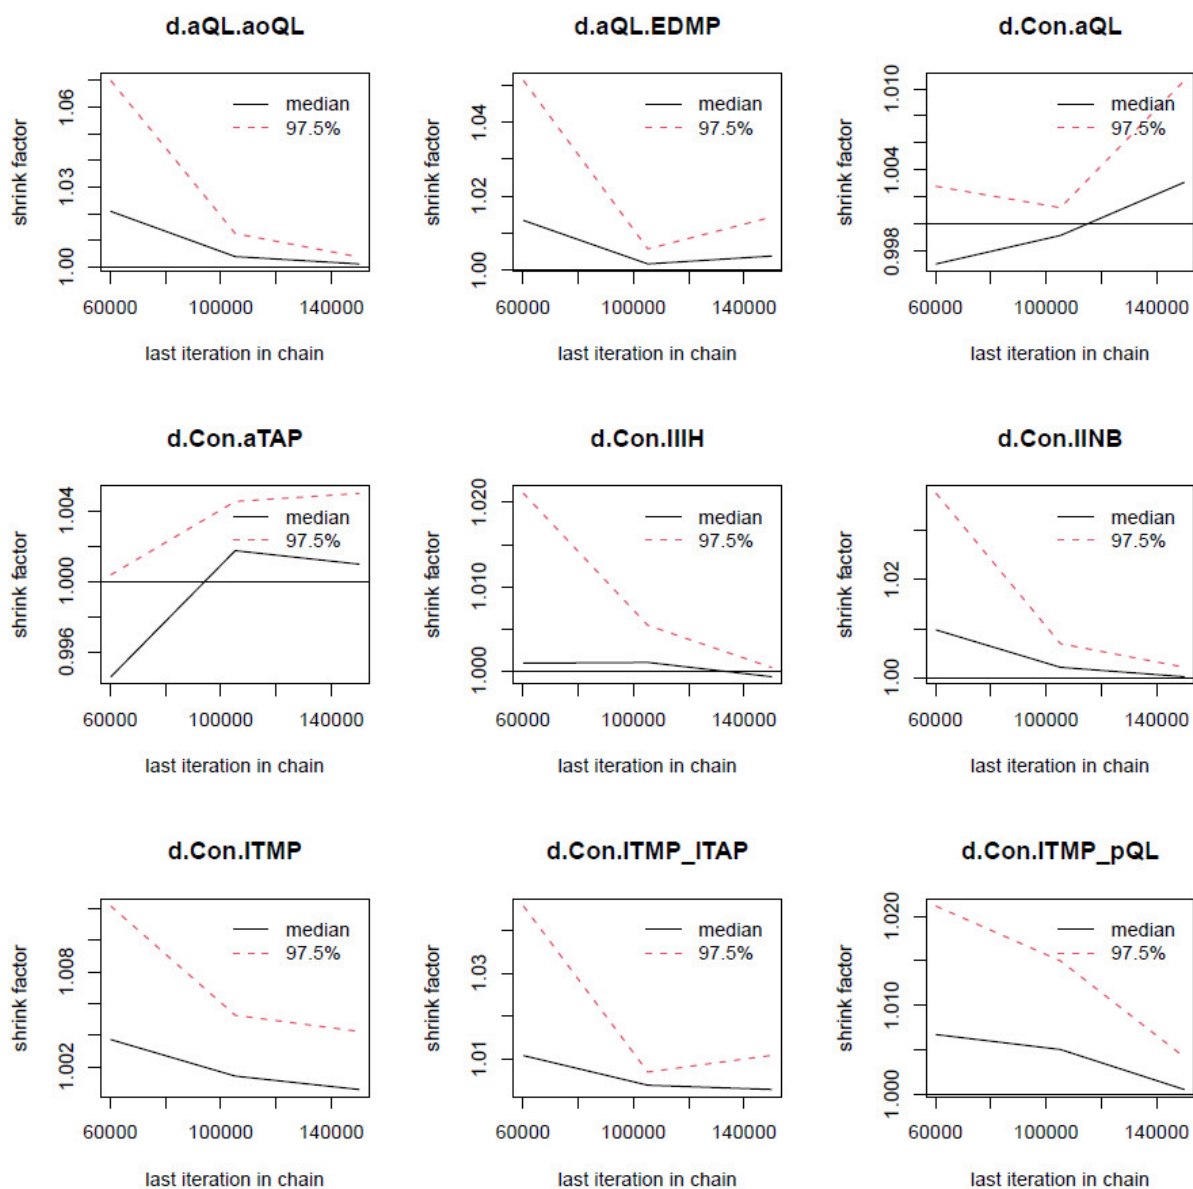

Figure S5. Cont.

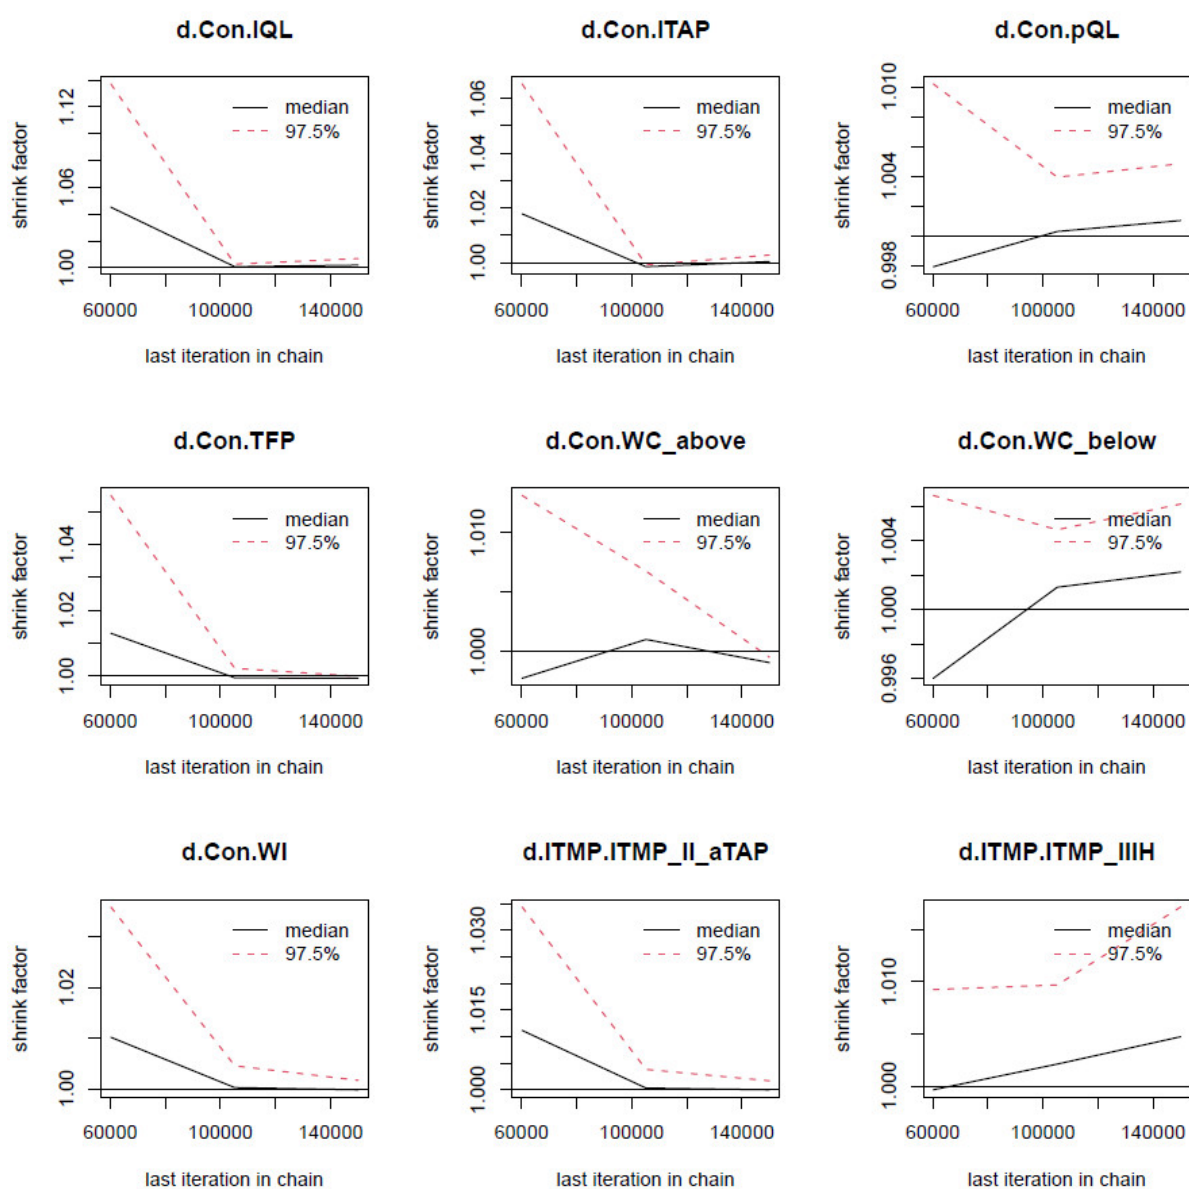

Figure S5. Cont.

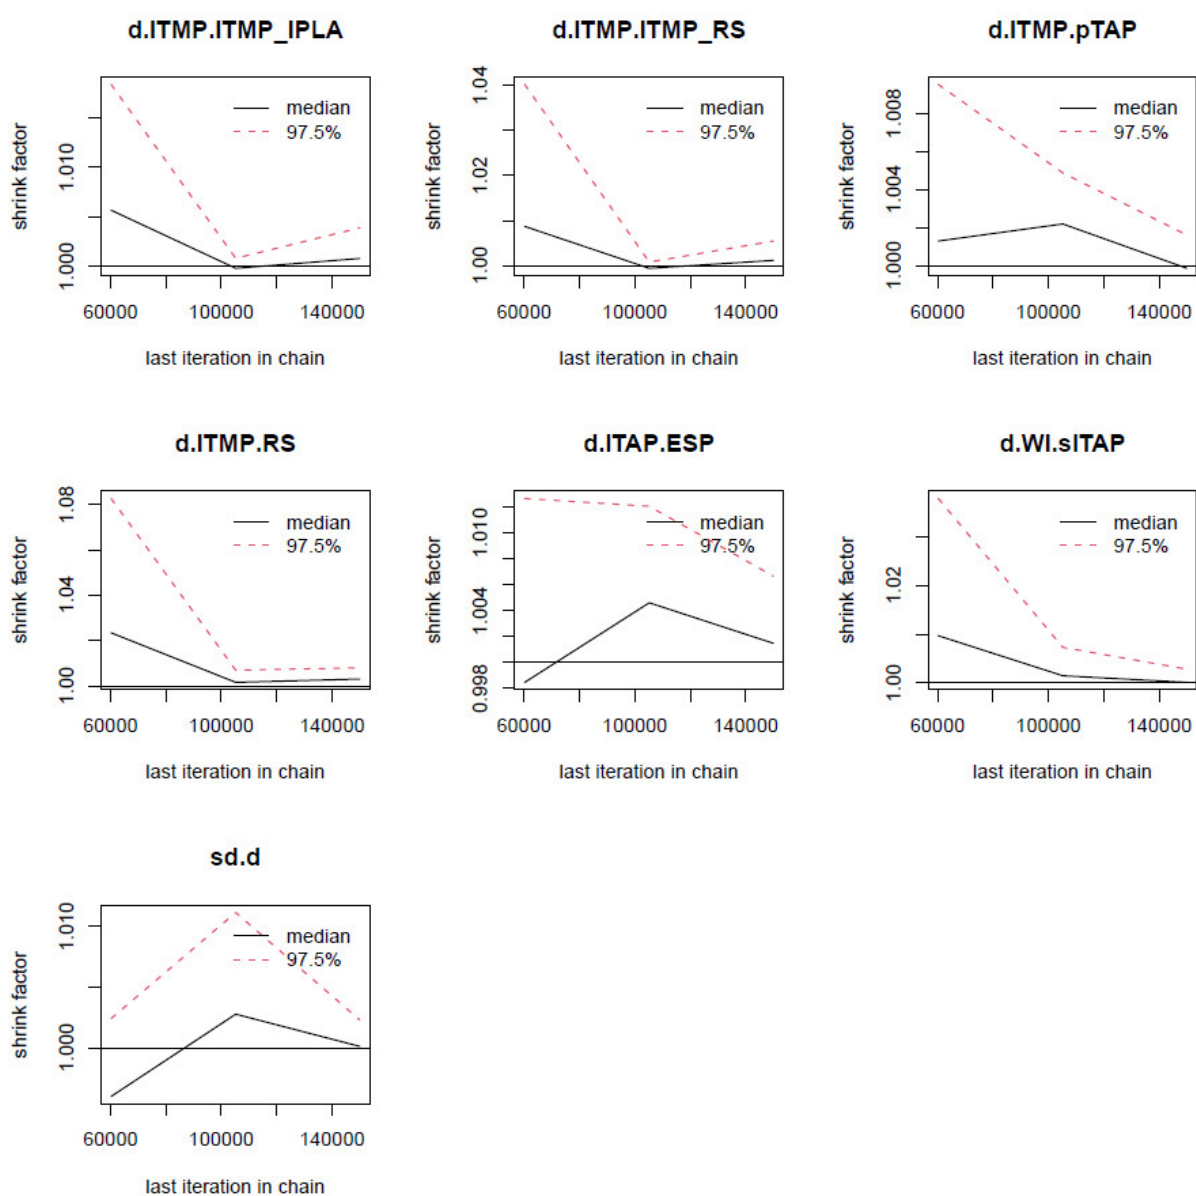

Figure S5. Cont.

(E) Forest plot comparing with control in random effect model.

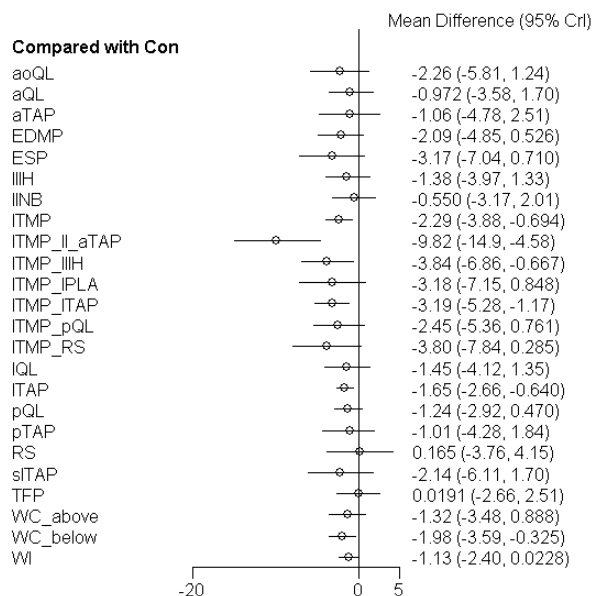

(F) Node splitting plot in random effect model.

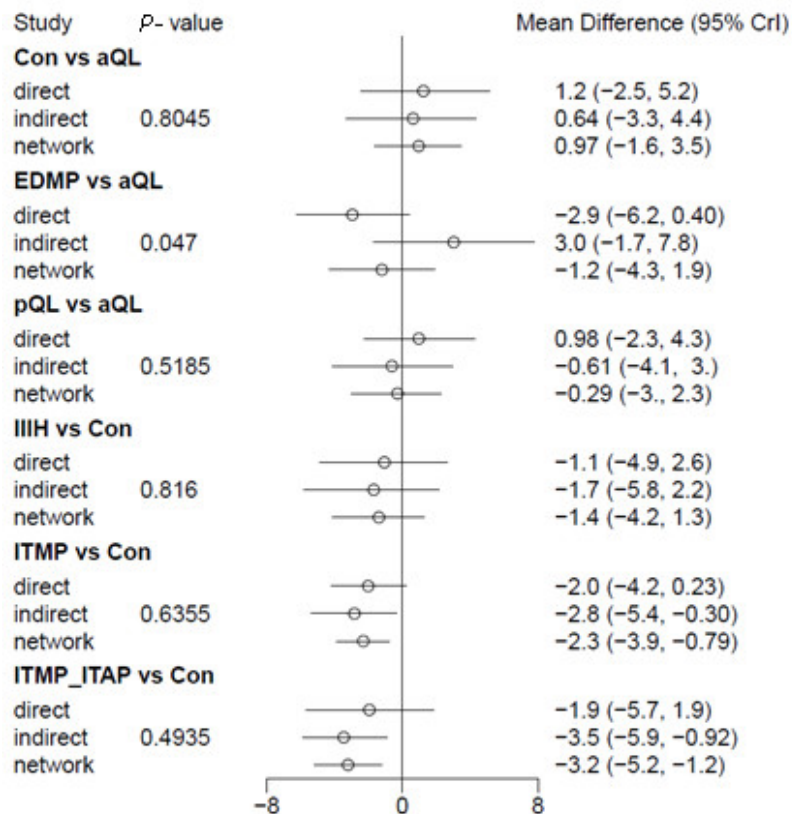

Figure S5. Cont.

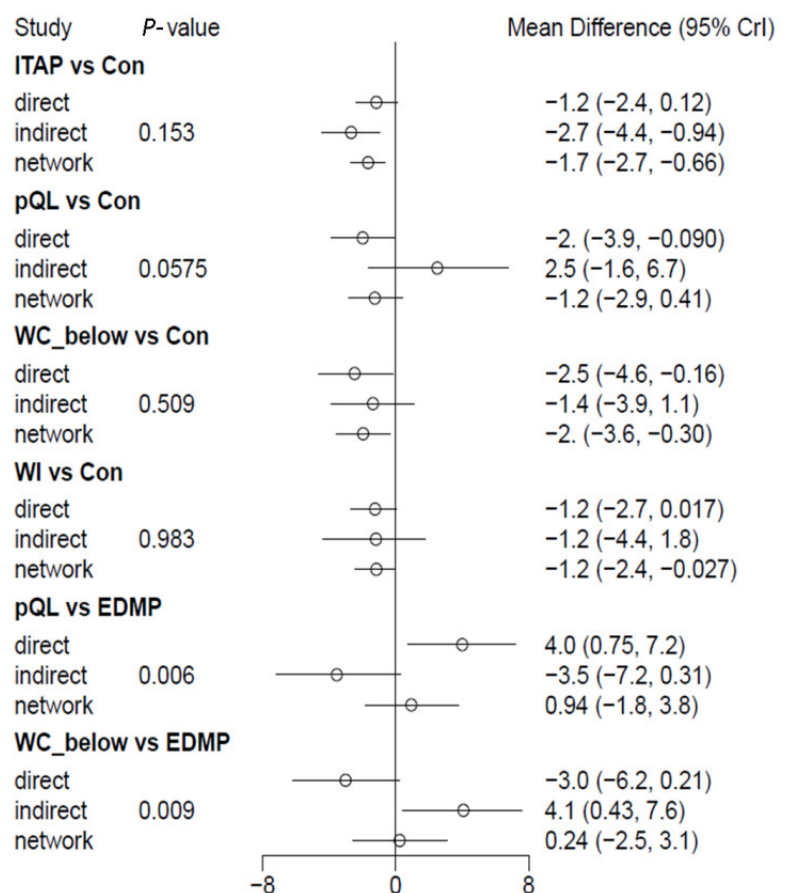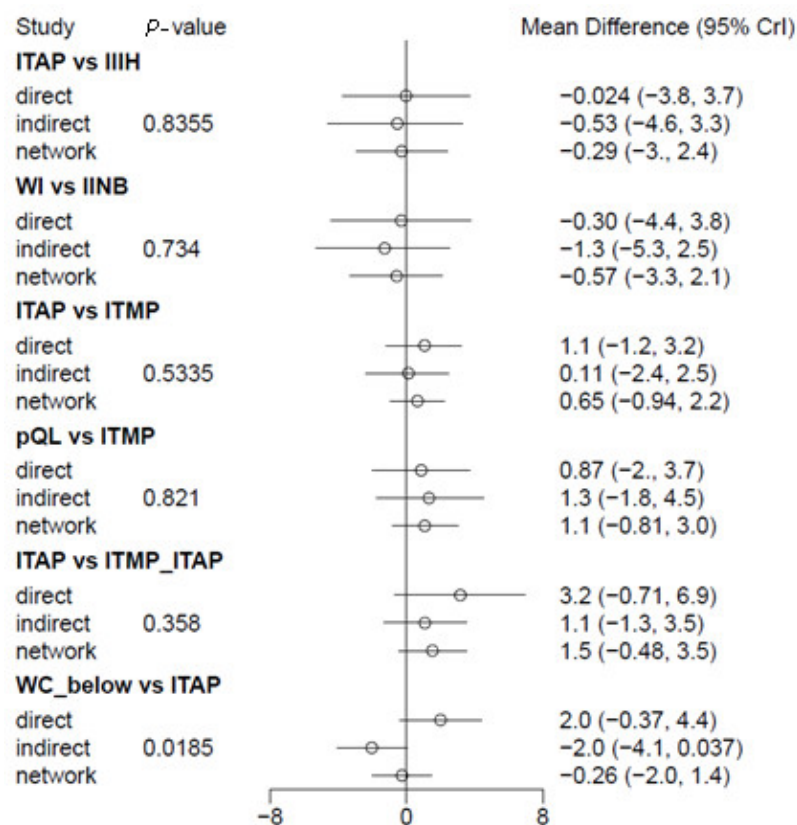

Figure S5. Cont.

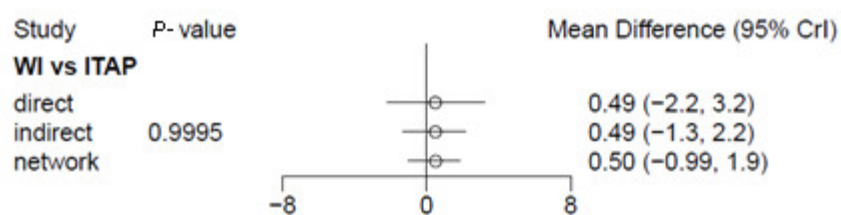

(G) Rankogram in random effect model.

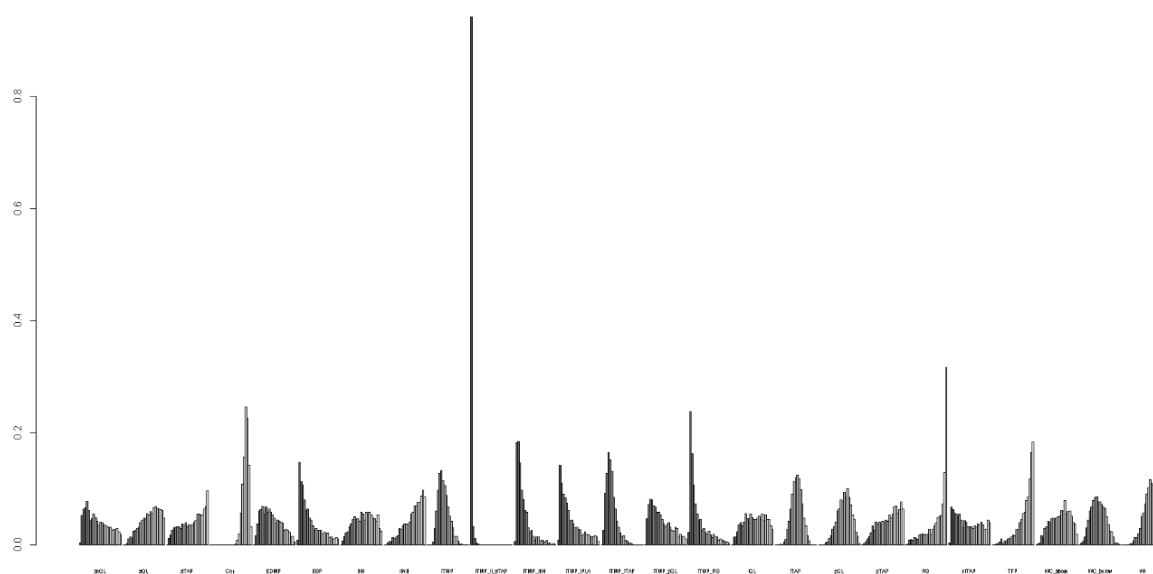

**Figure S5.** Pain at rest 6 h after surgery. (A) Trace plot and density plot in fixed effect model; (B) Trace plot and density plot in random effect model; (C) Gelman-Rubin-Brooks plot in fixed effect model; (D) Gelman-Rubin-Brooks plot in random effect model; (E) Forest plot comparing with control in random effect model; (F) Node splitting plot in random effect model; (G) Rankogram in random effect model.

(A) Trace plot and density plot in fixed effect model.

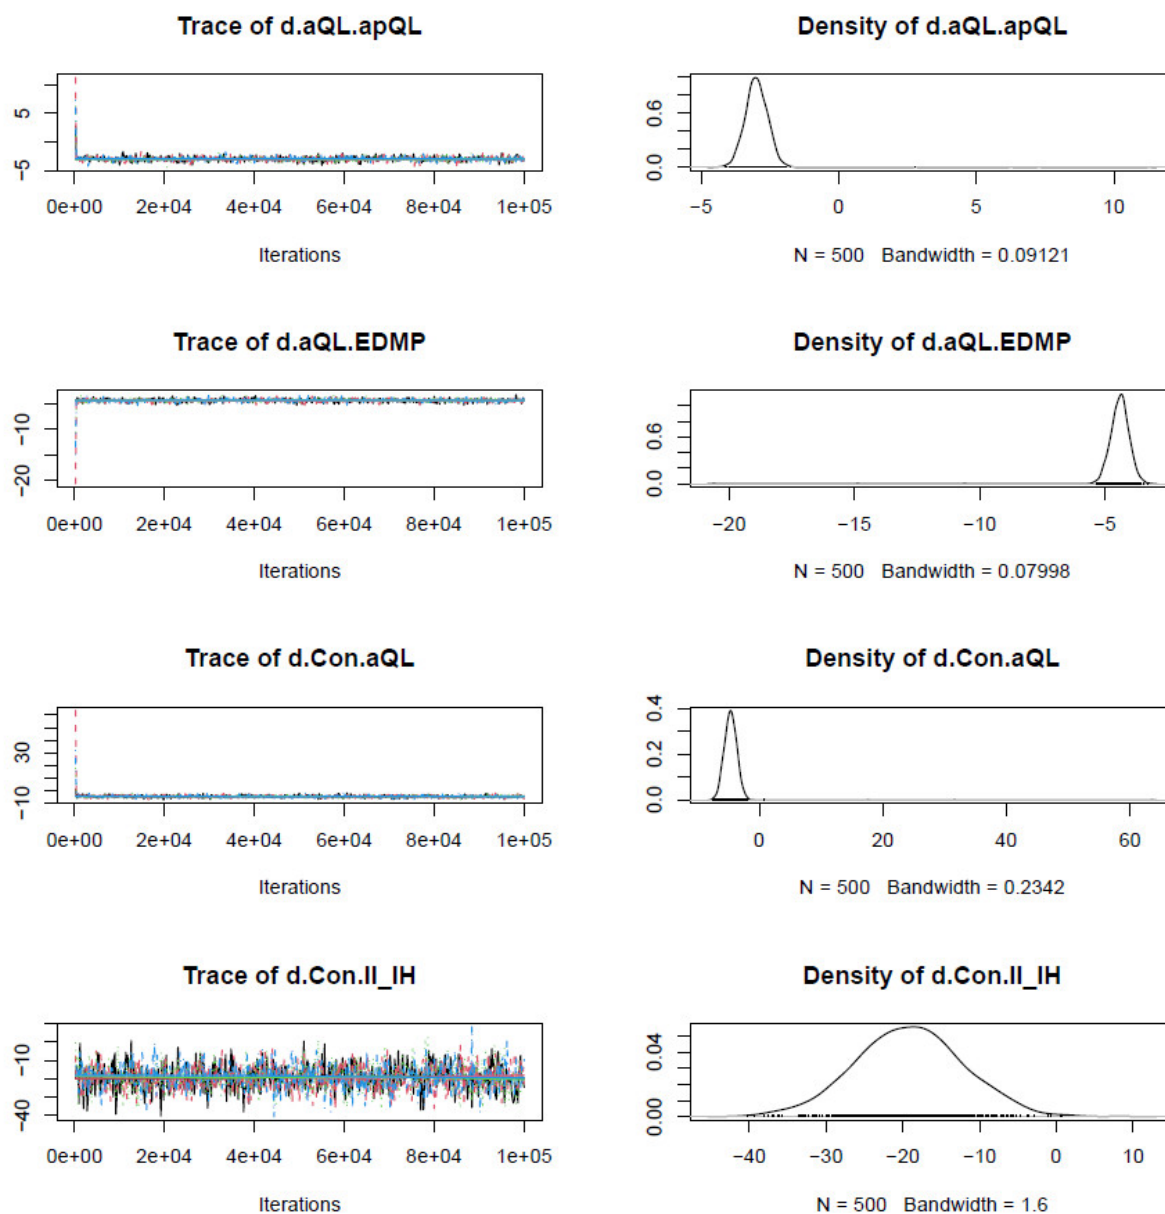

Figure S6. Cont.

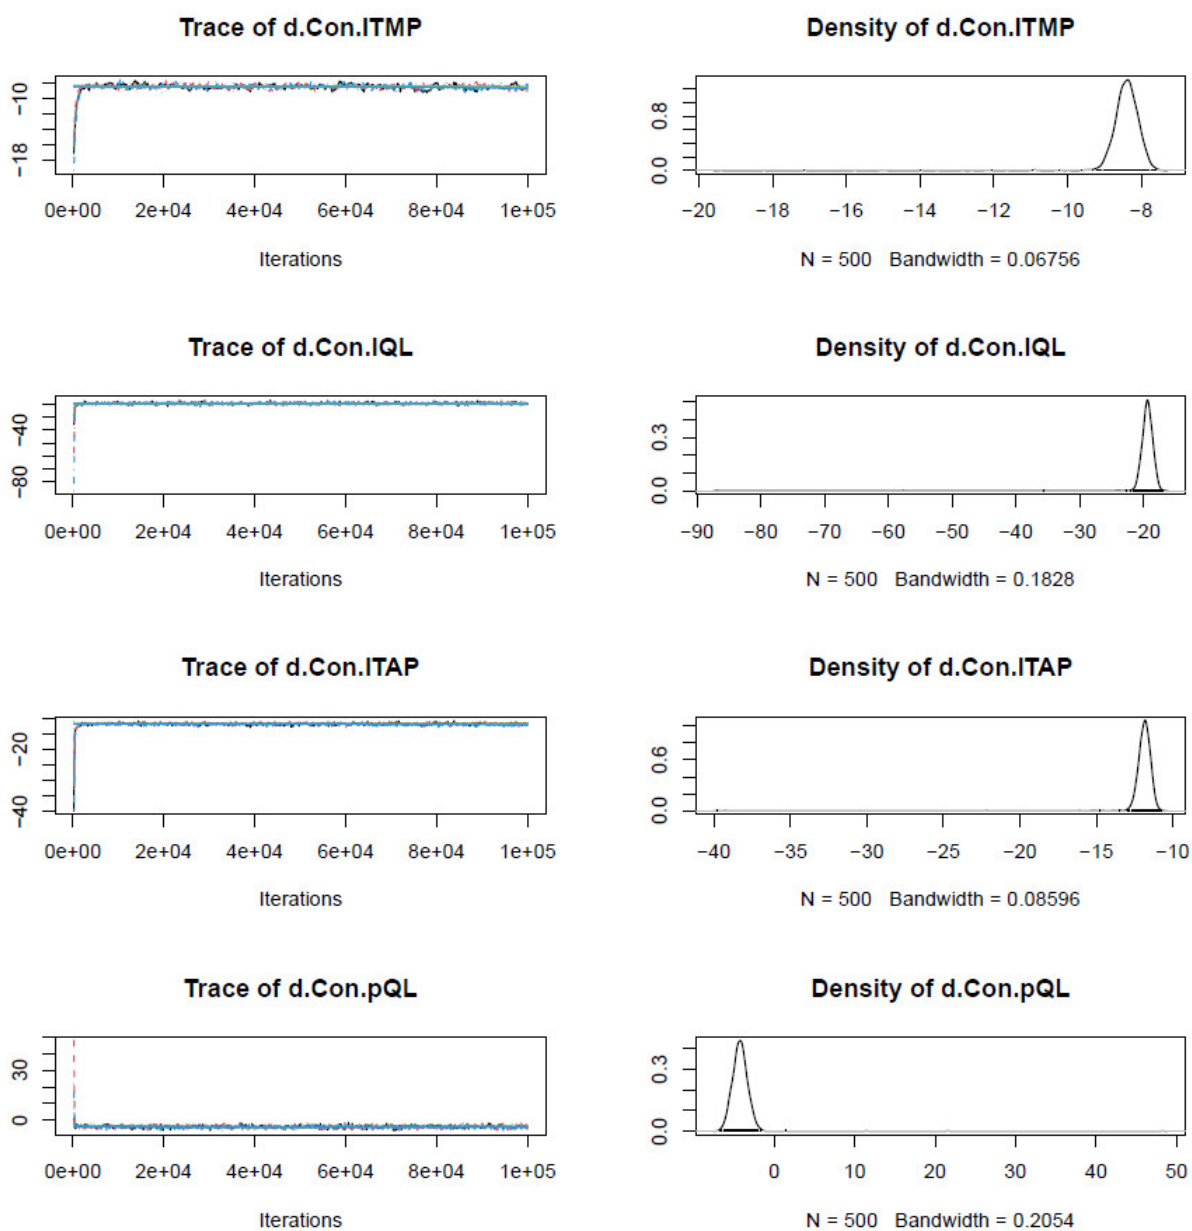

Figure S6. Cont.

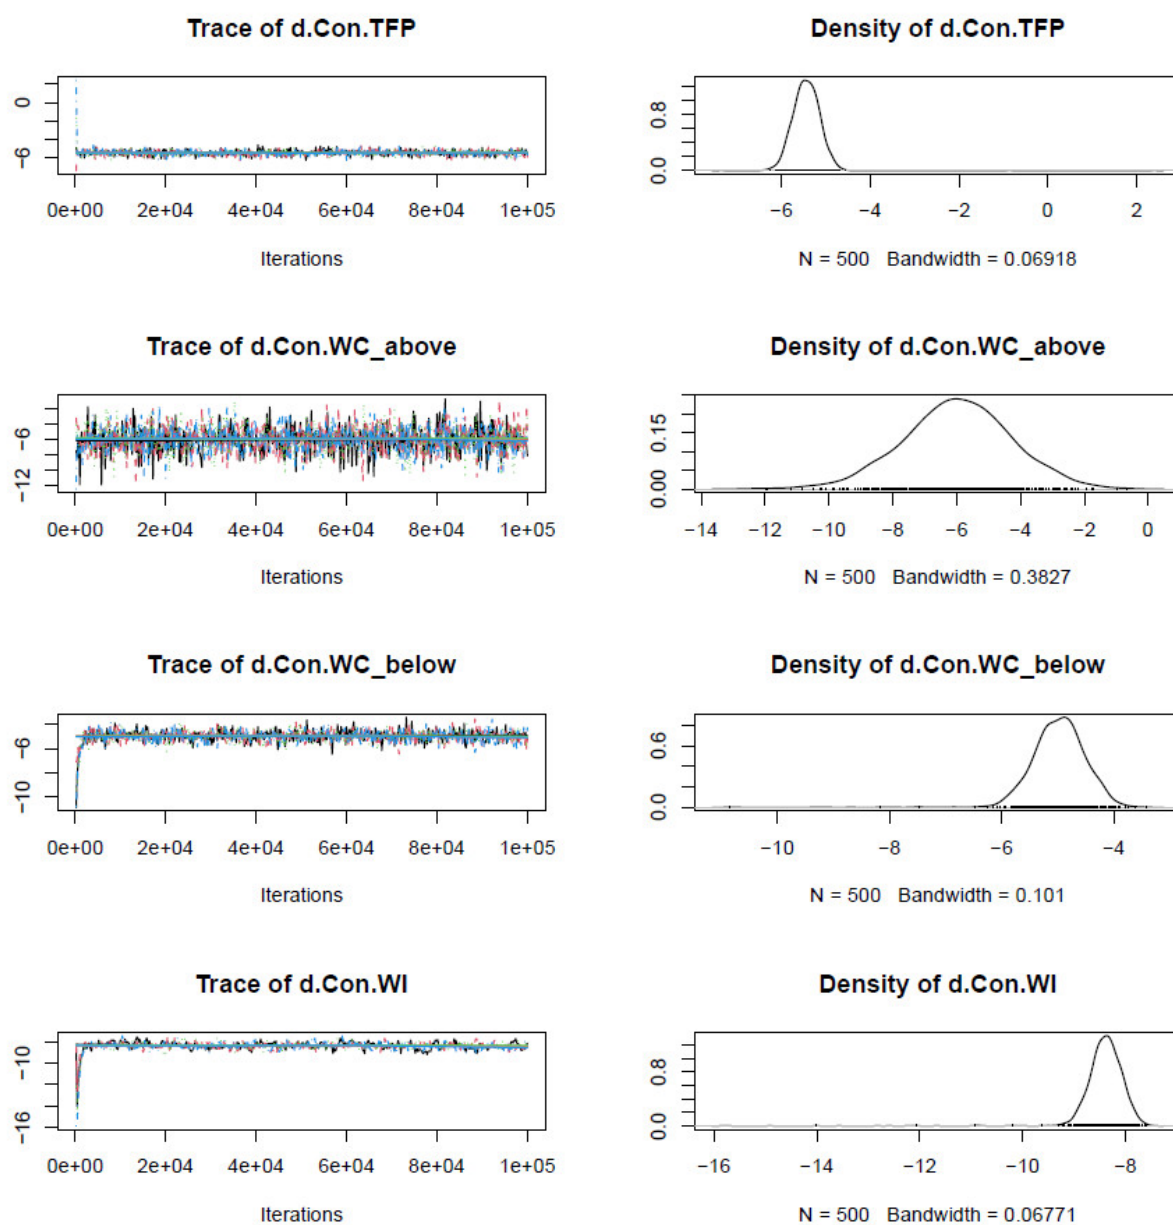

Figure S6. Cont.

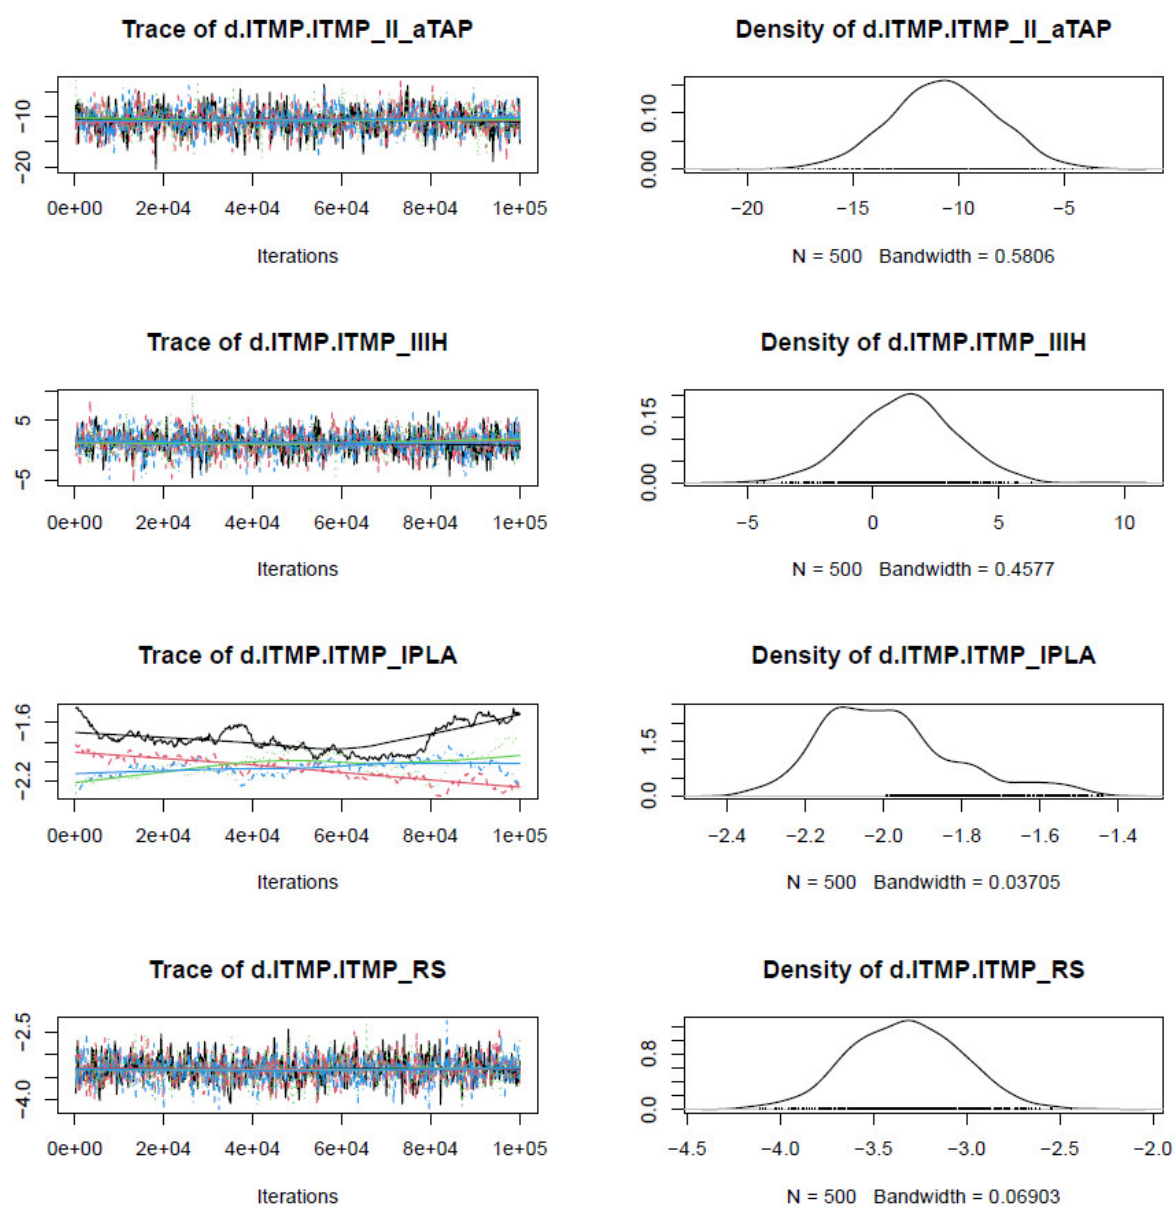

Figure S6. Cont.

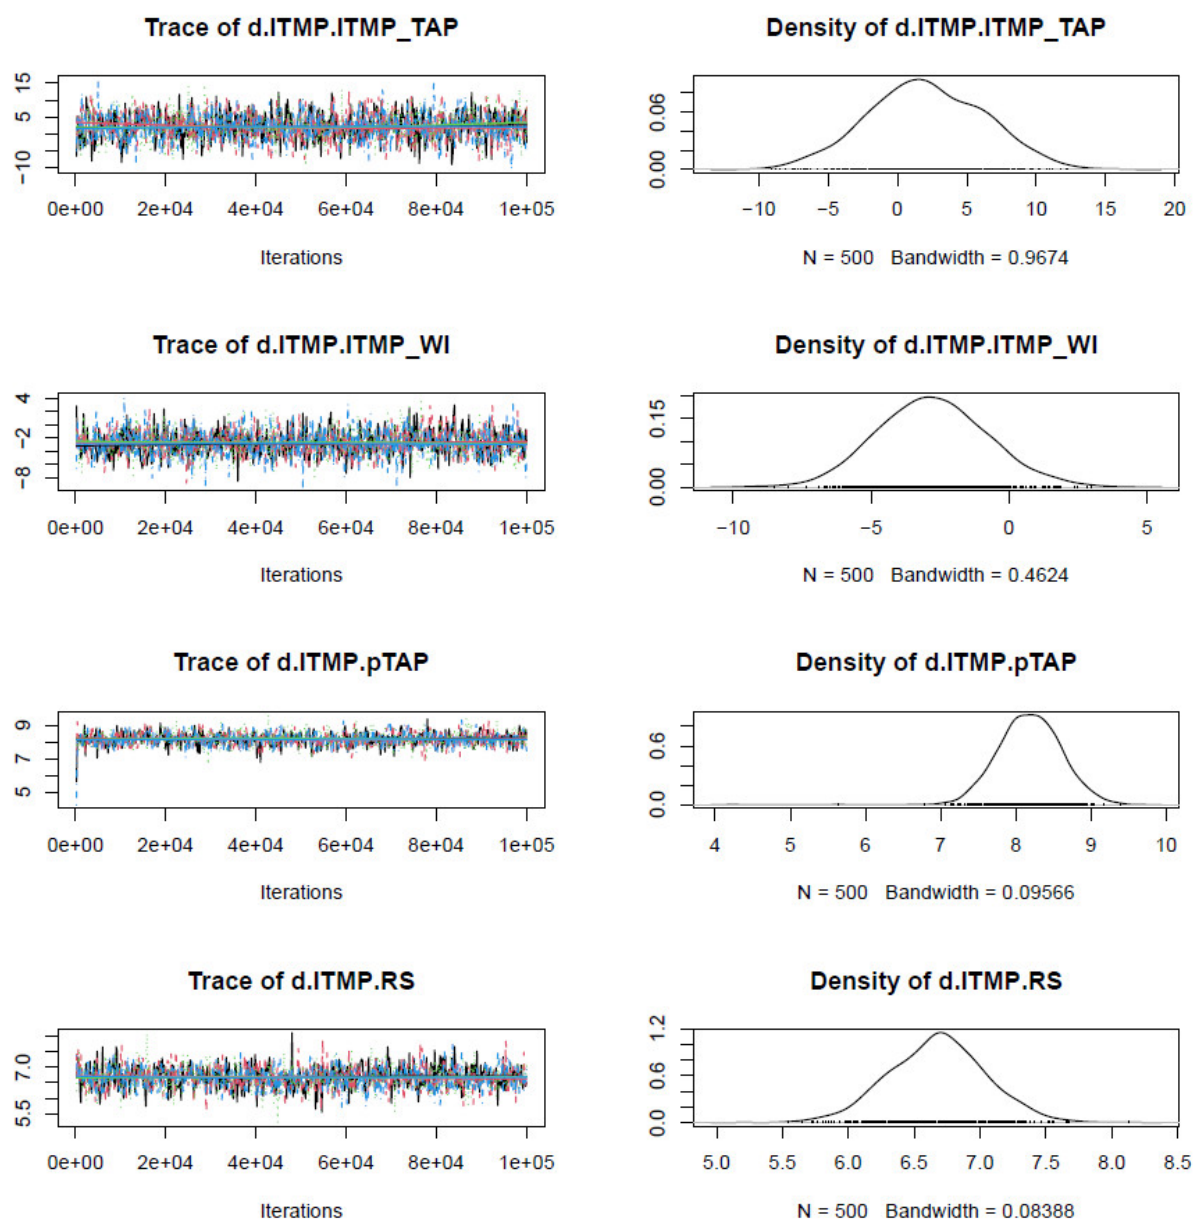

Figure S6. Cont.

(B) Trace plot and density plot in random effect model.

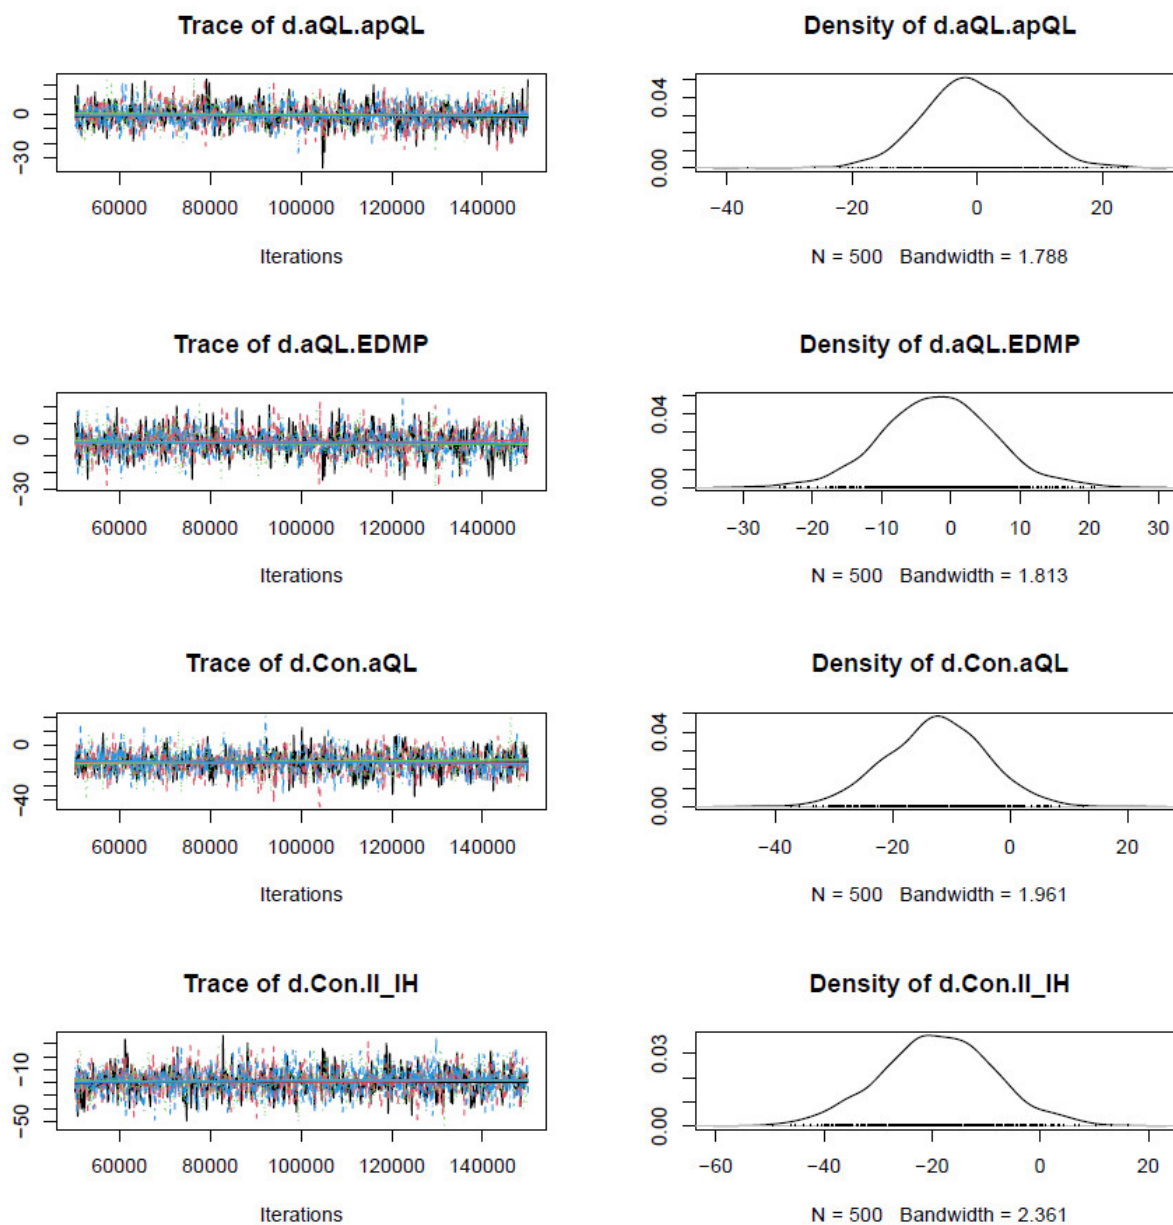

Figure S6. Cont.

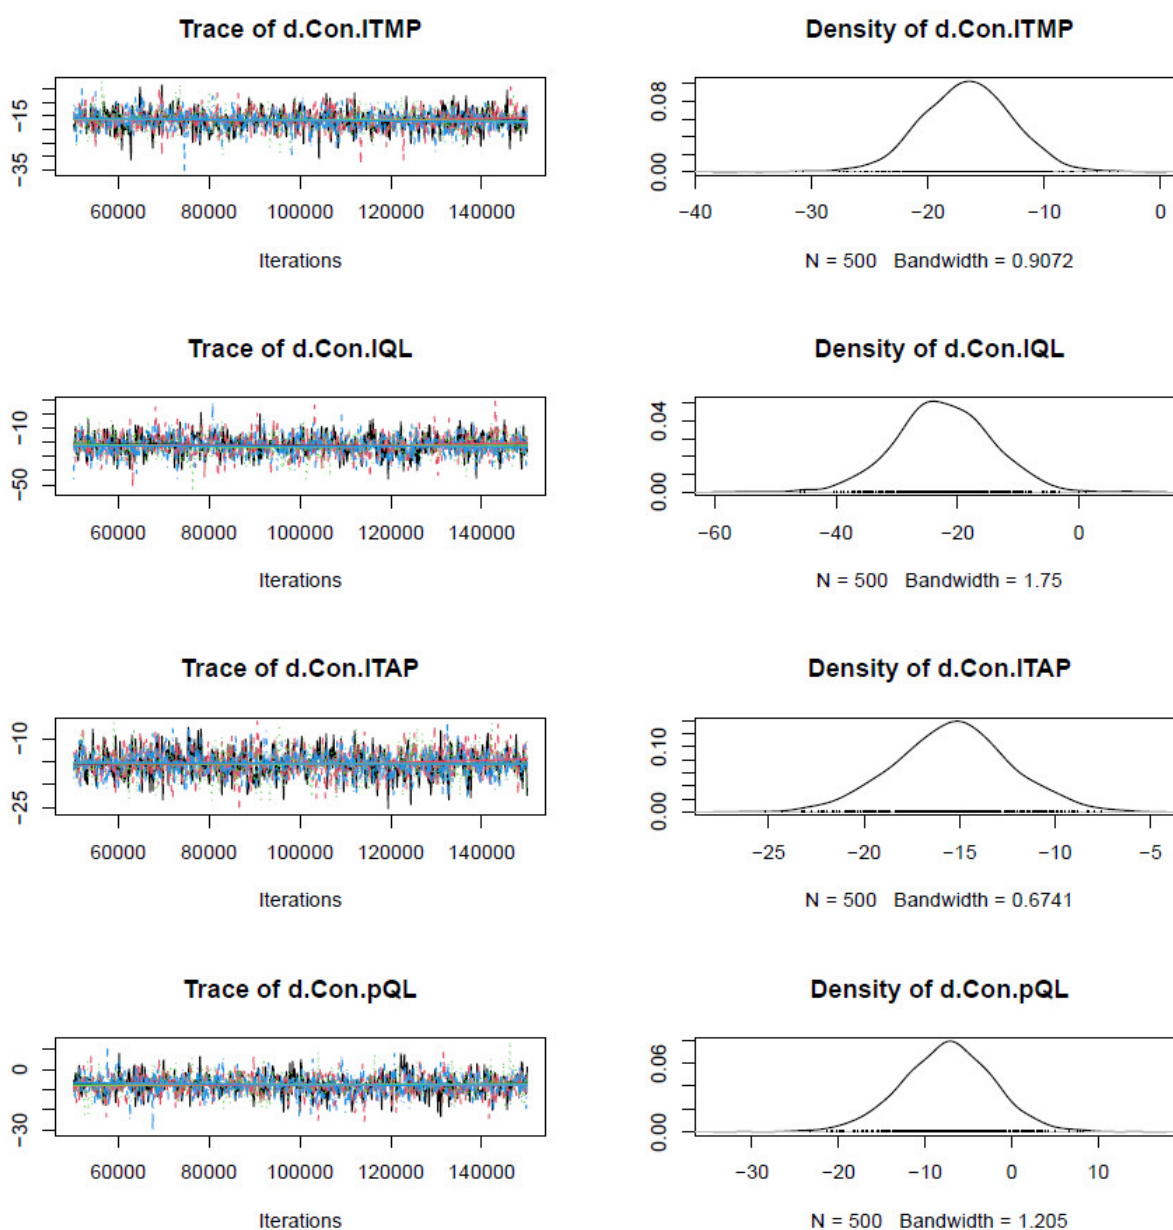

Figure S6. Cont.

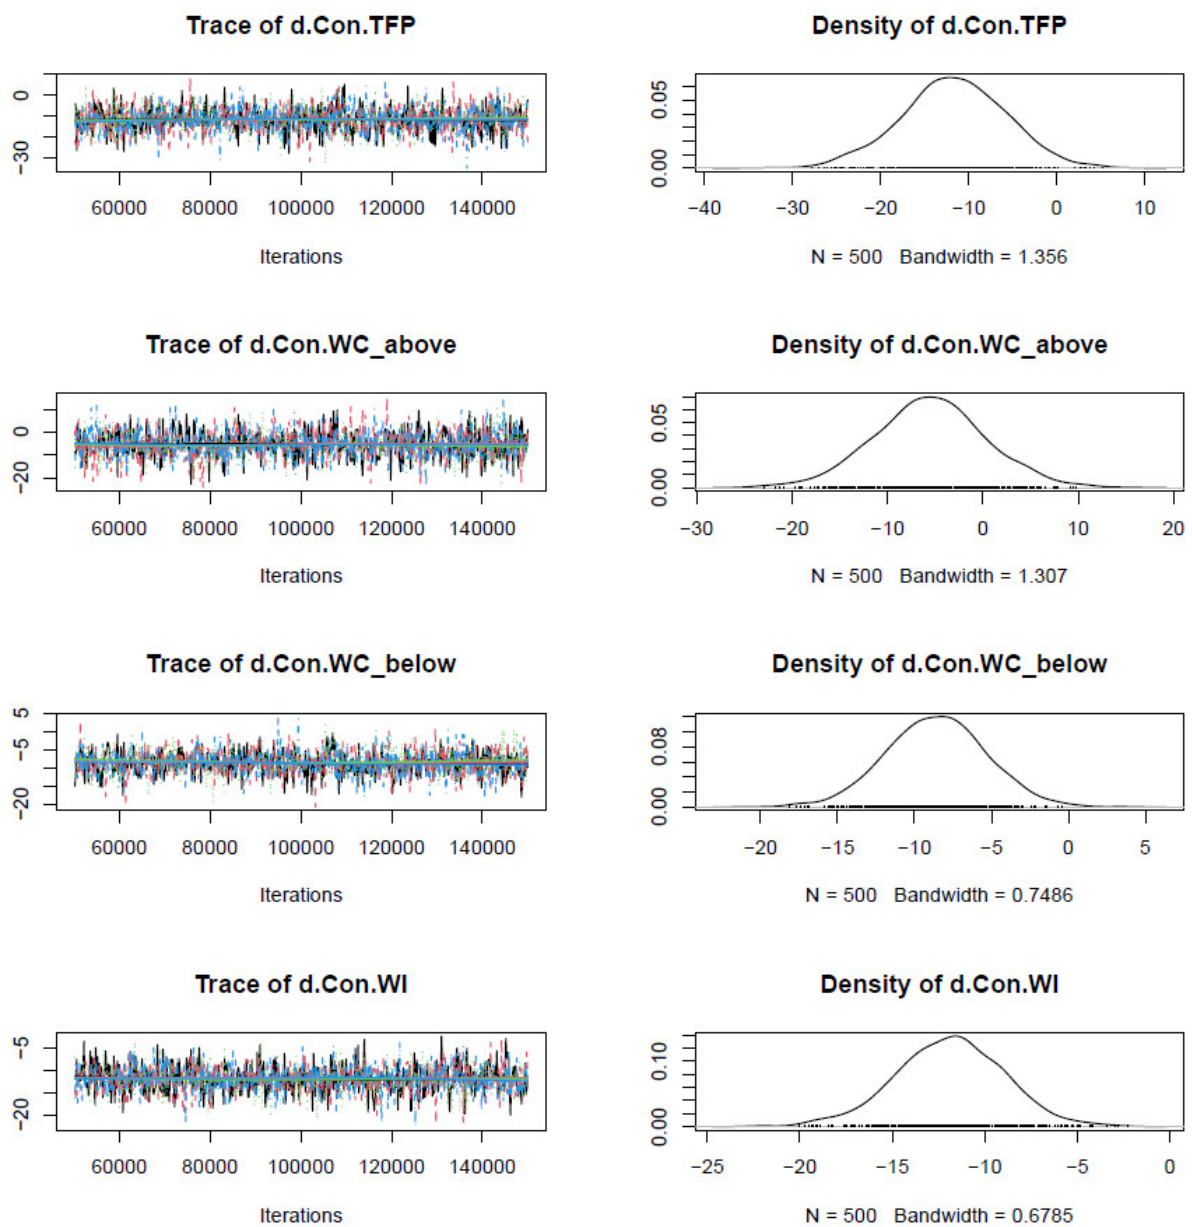

Figure S6. Cont.

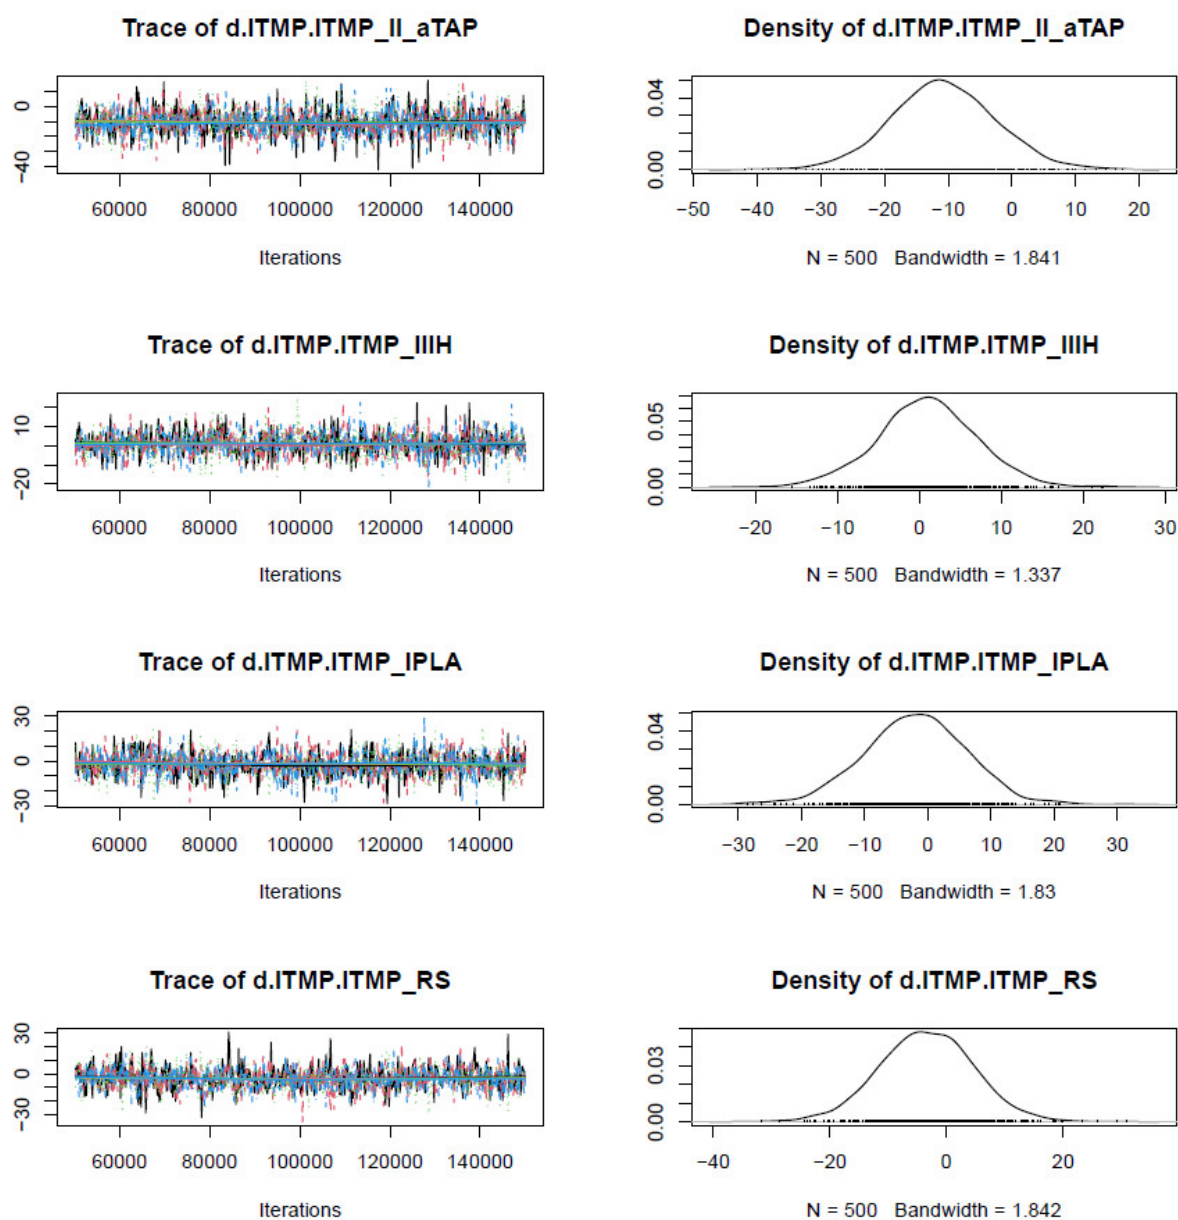

Figure S6. Cont.

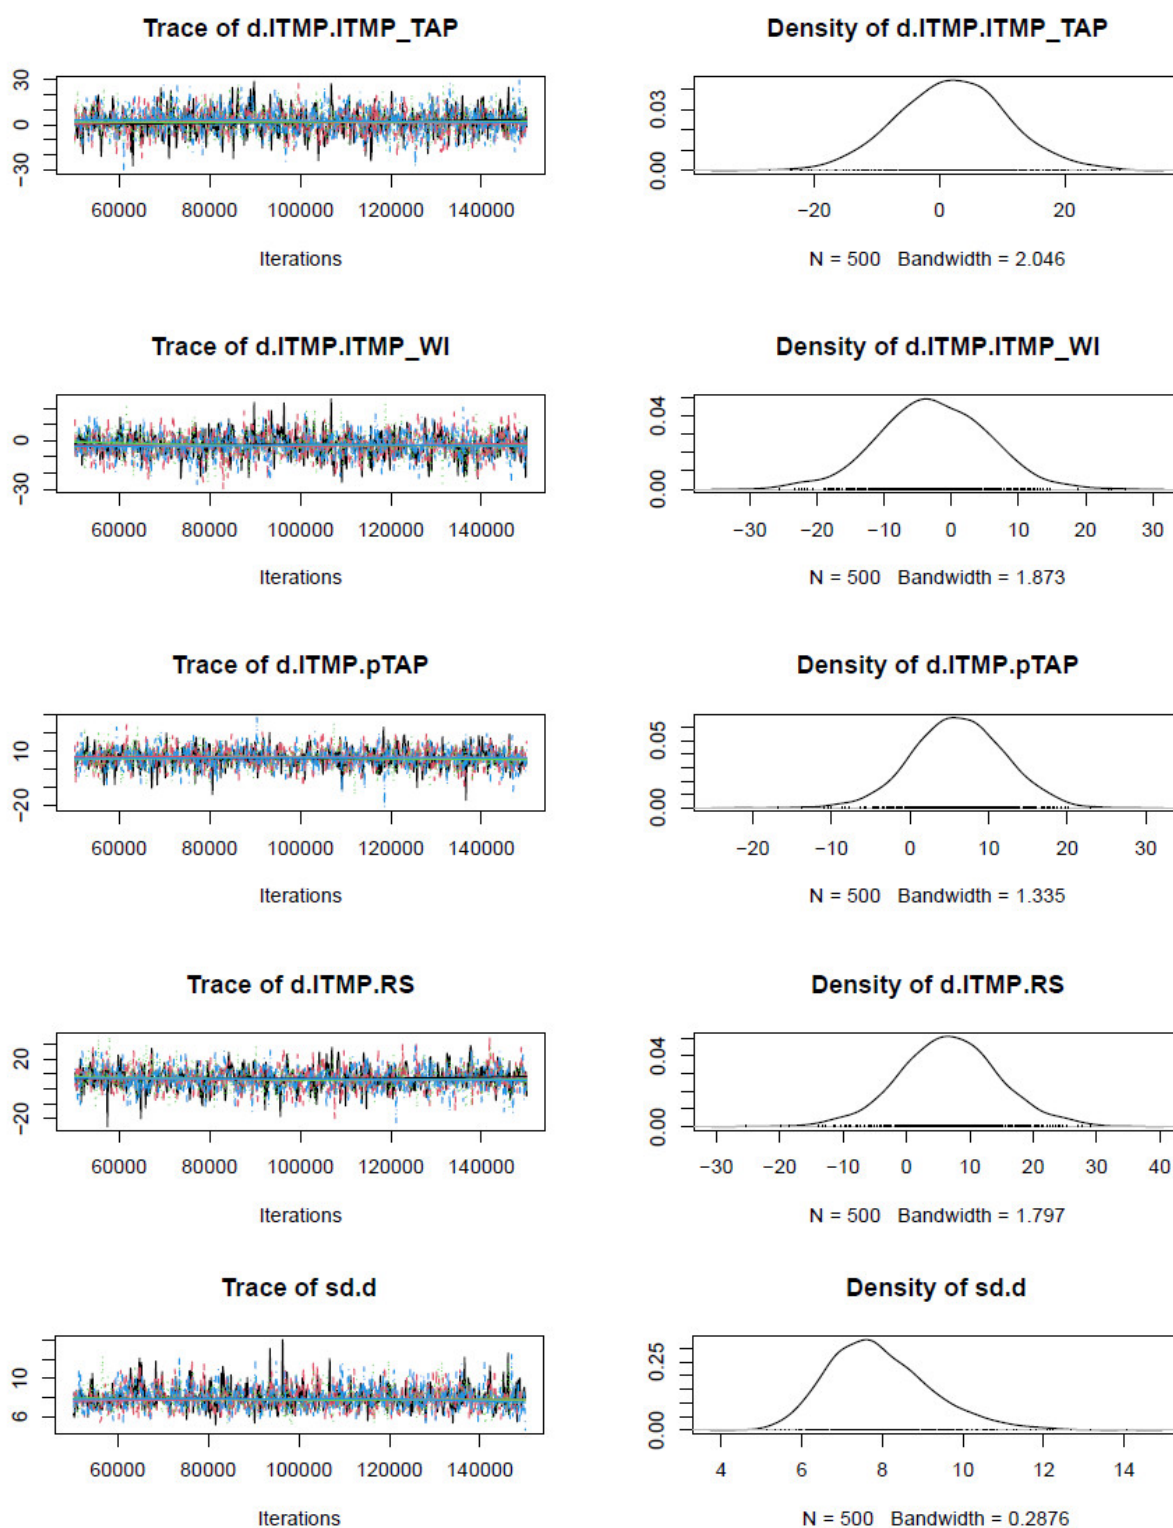

Figure S6. Cont.

(C) Gelman-Rubin-Brooks plot in fixed effect model.

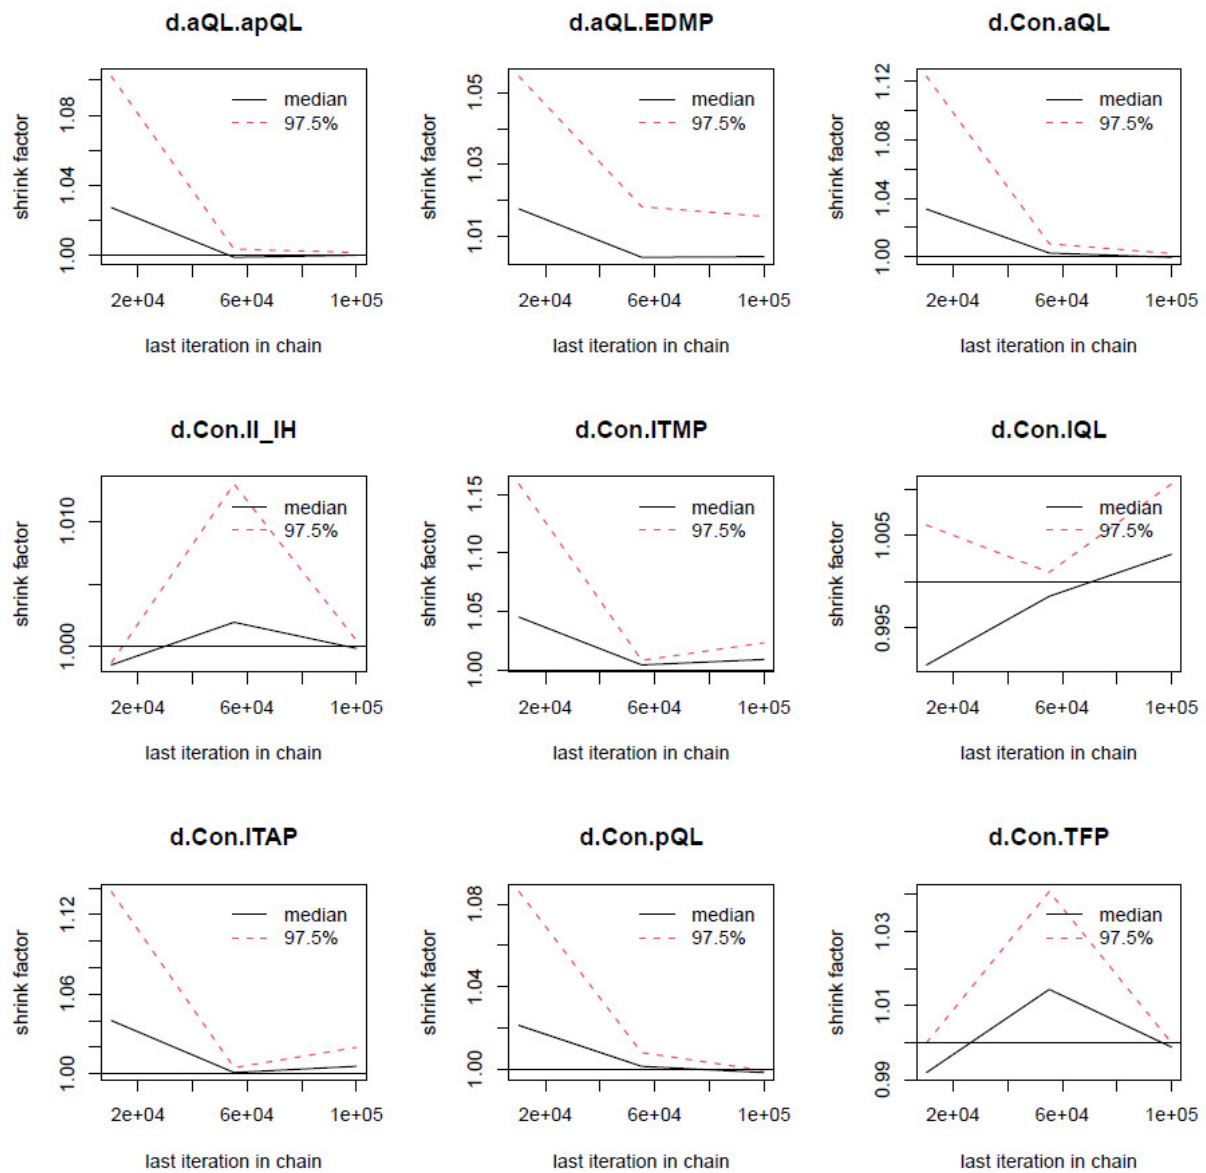

Figure S6. Cont.

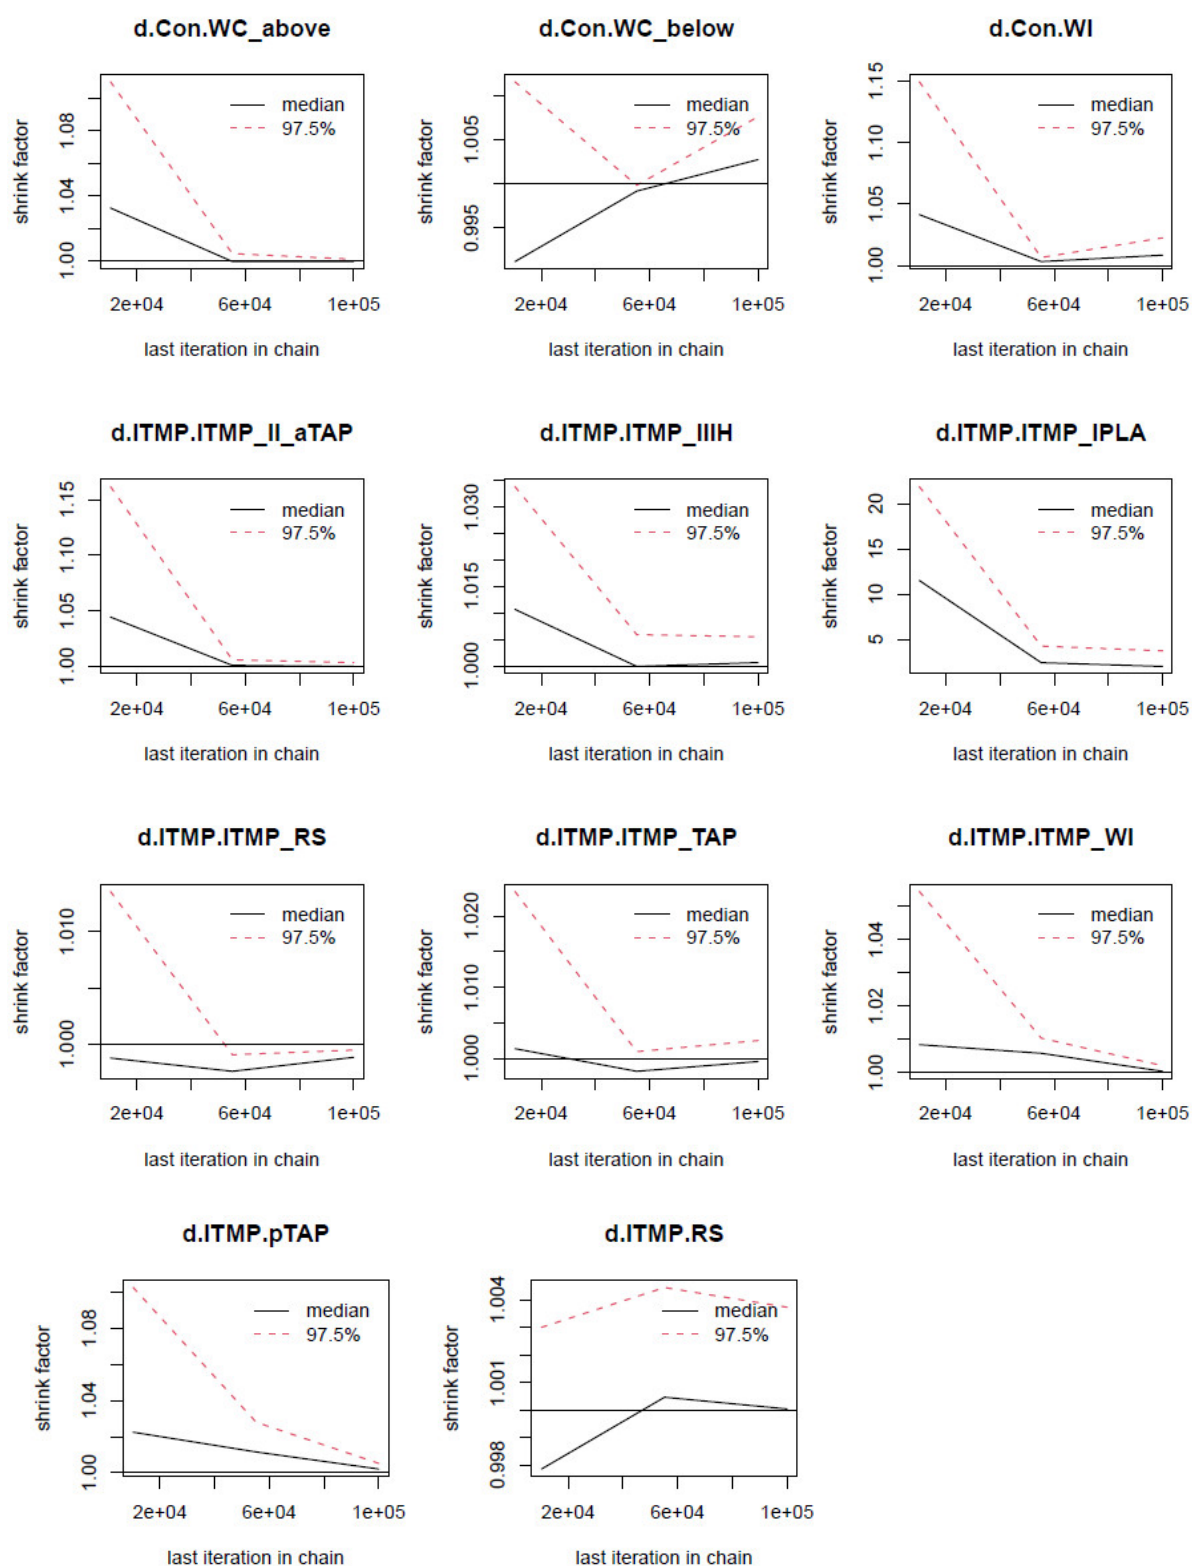

Figure S6. Cont.

(D) Gelman-Rubin-Brooks plot in random effect model.

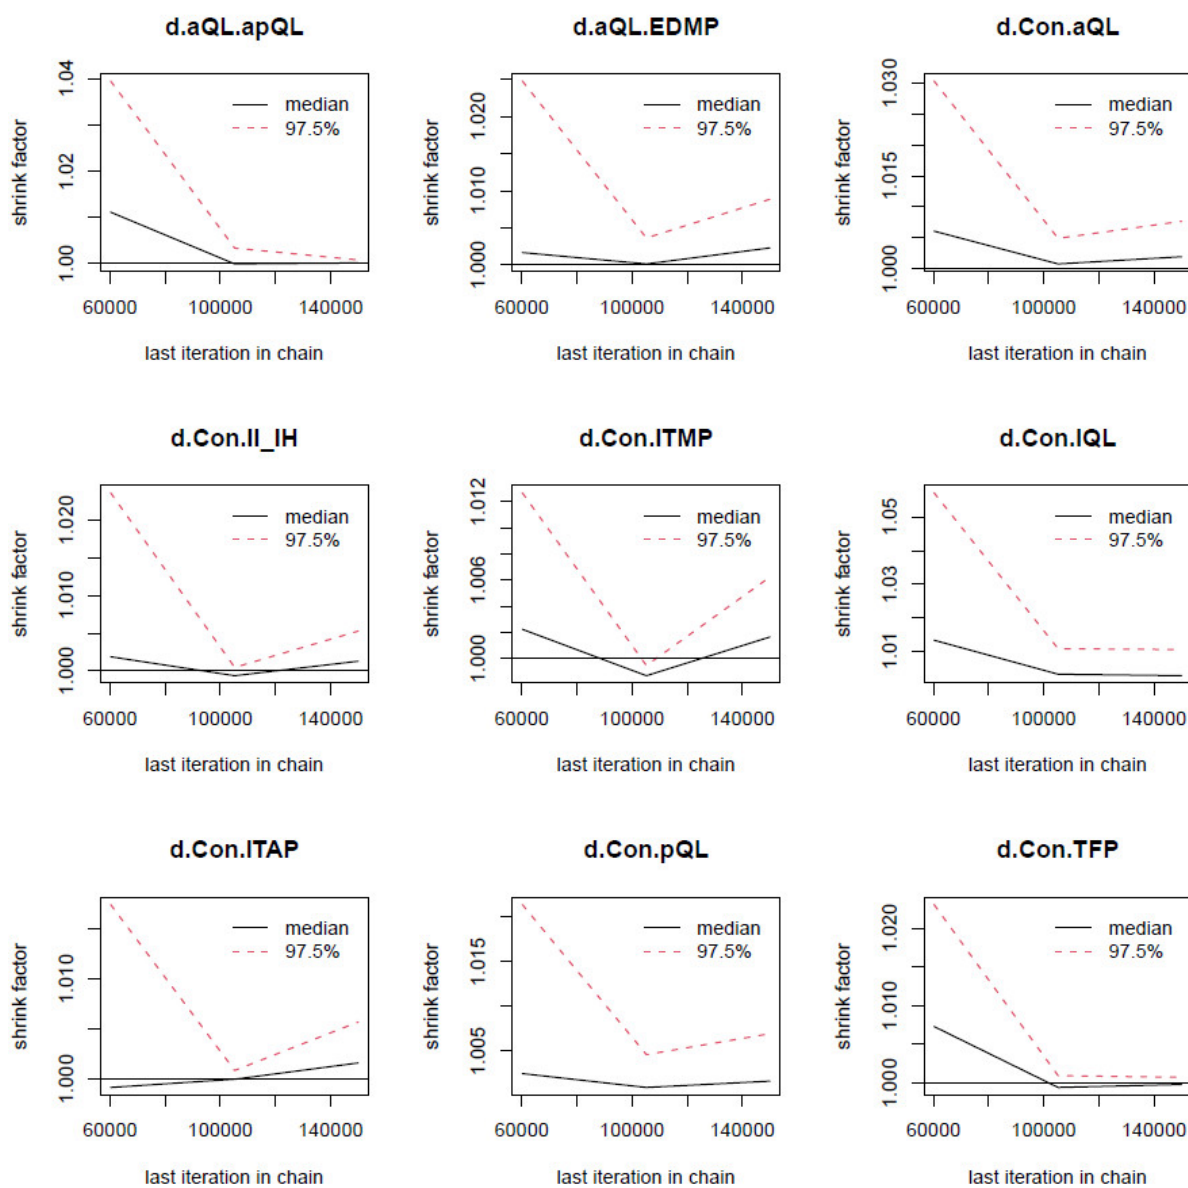

Figure S6. Cont.

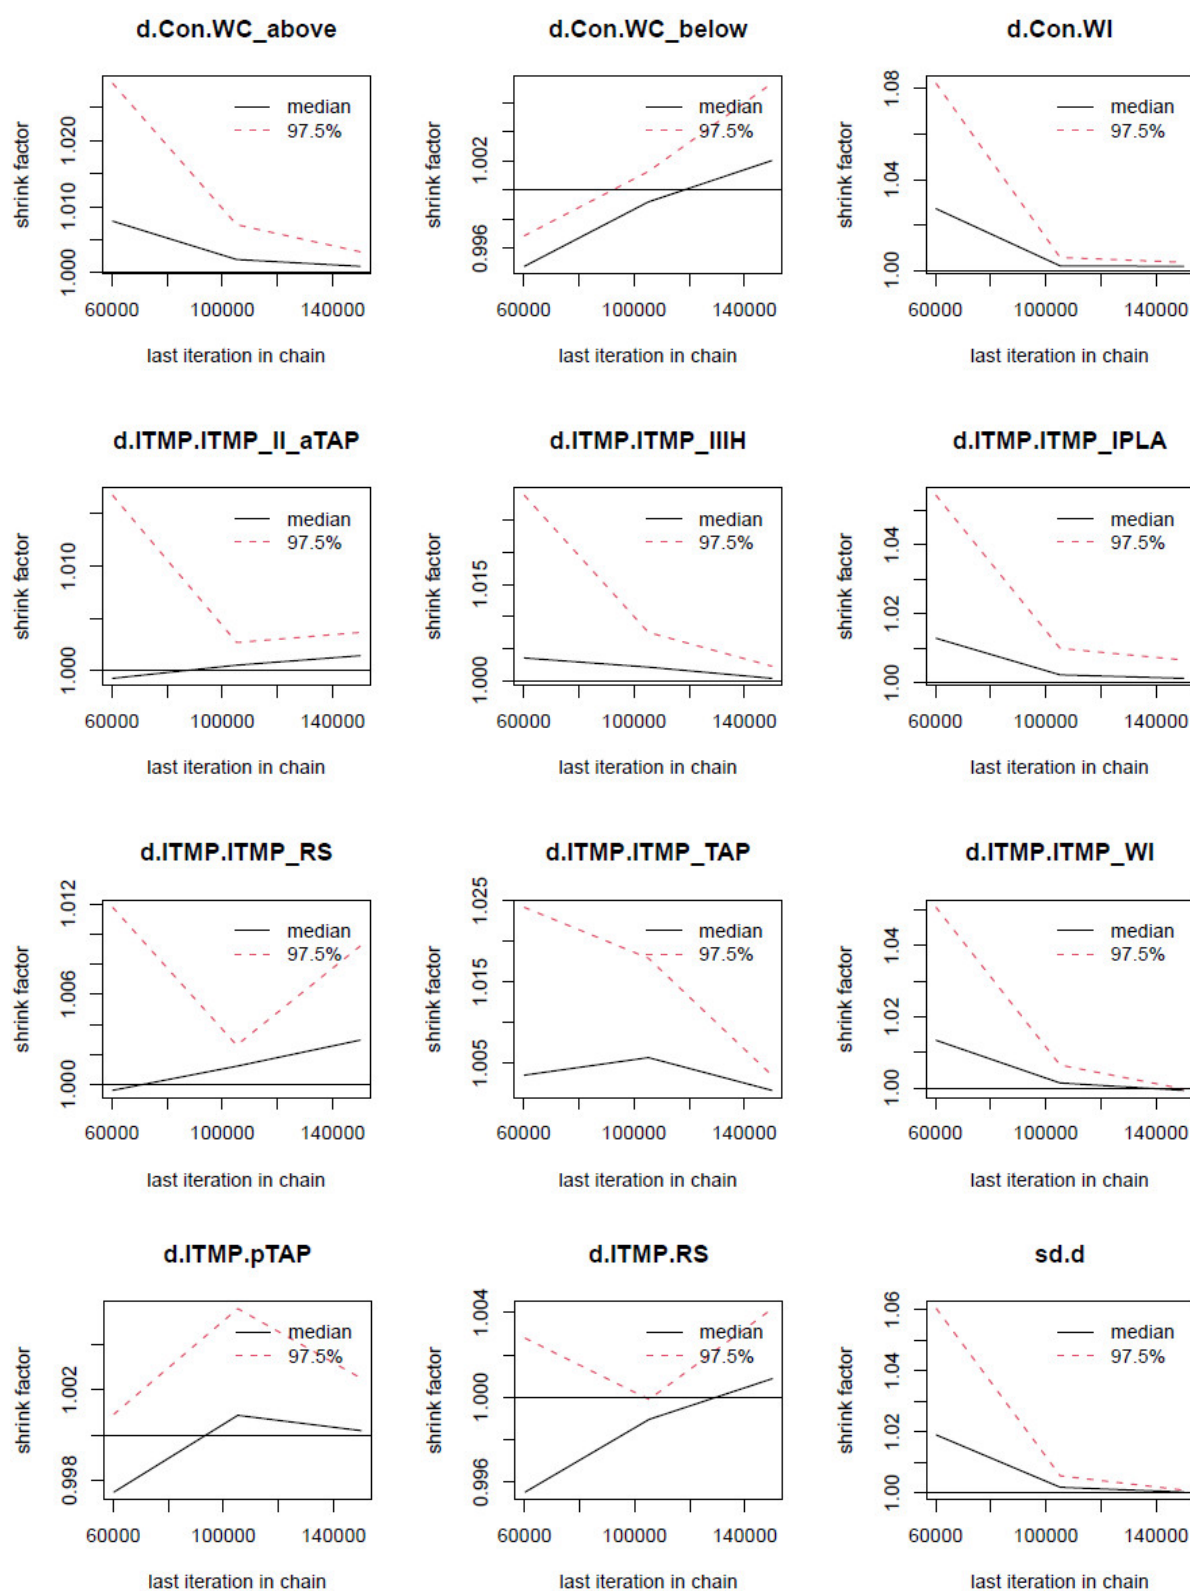

Figure S6. Cont.

(E) Forest plot comparing with control in random effect model.

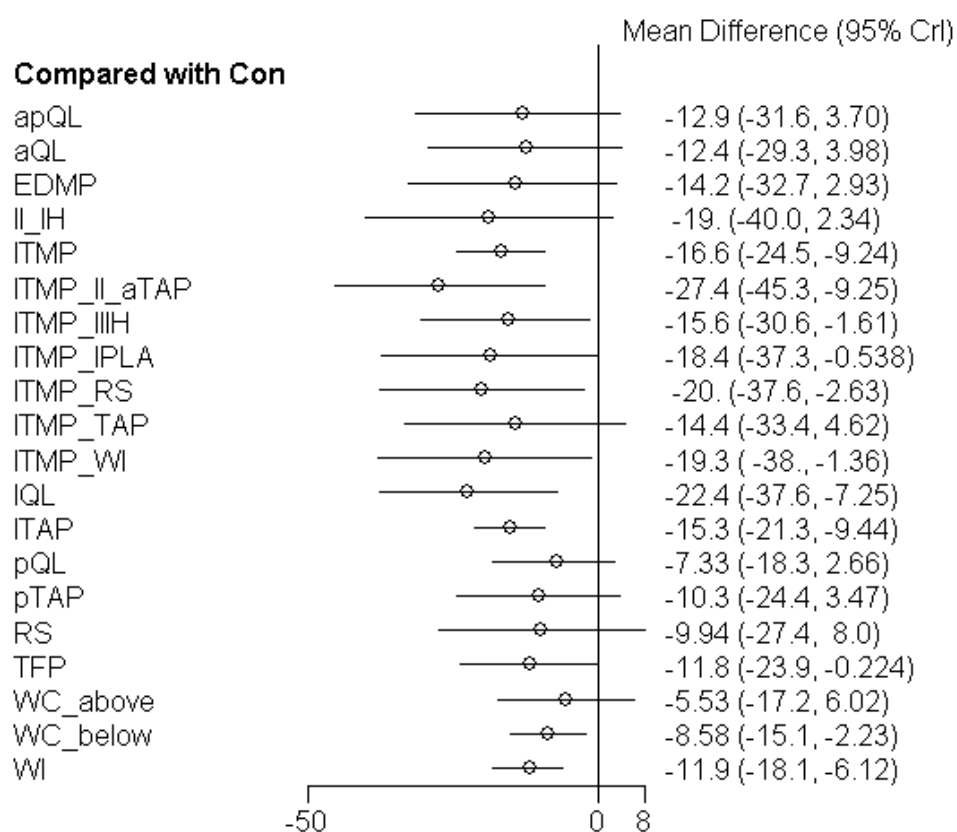**Figure S6.** Cont.

(F) Node splitting plot in random effect model.

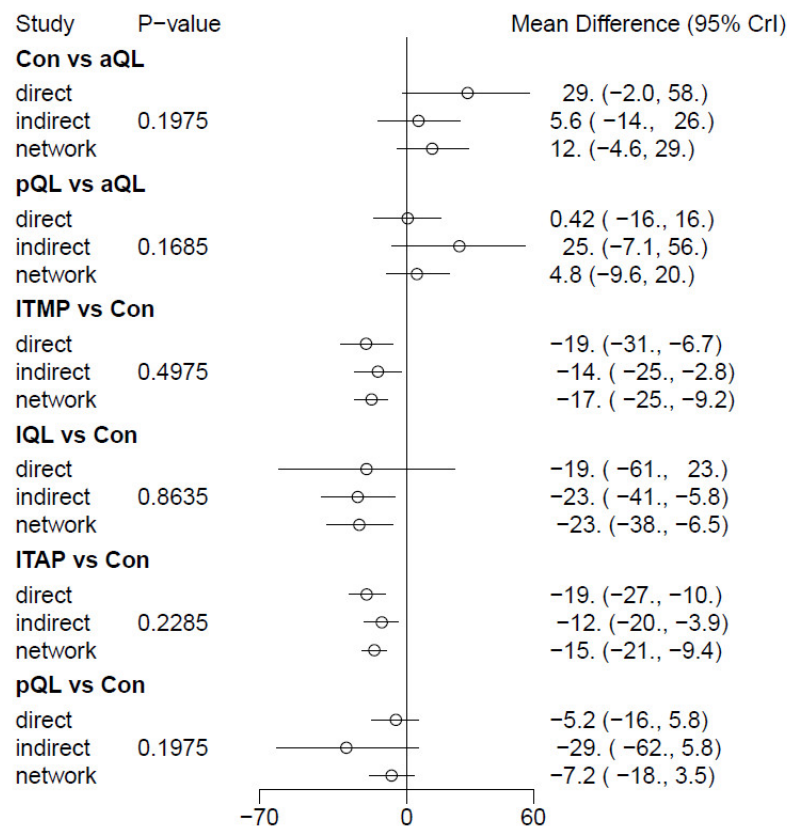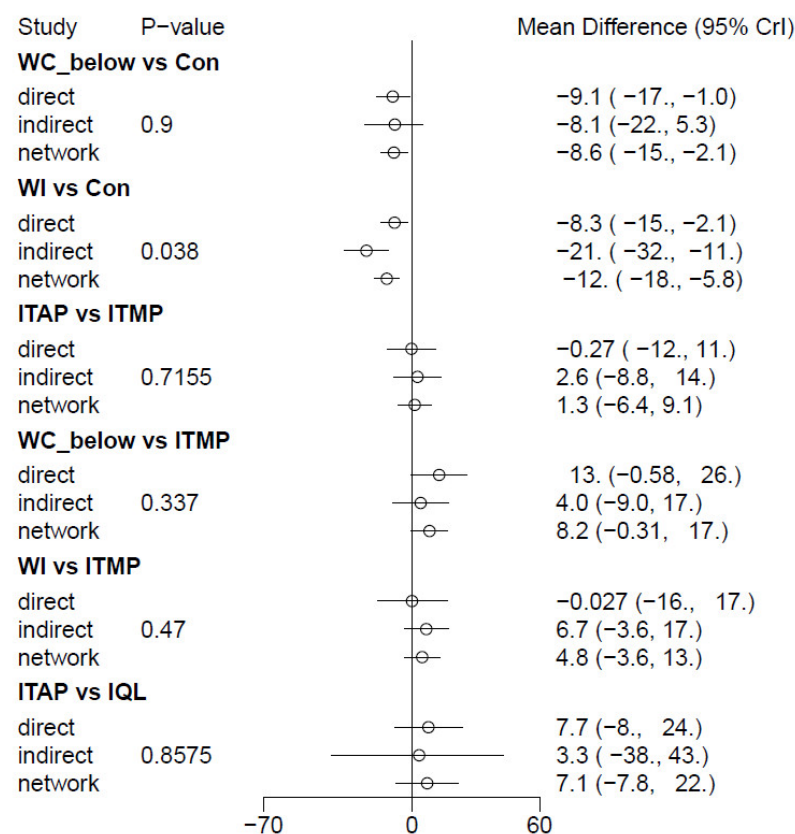

Figure S6. Cont.

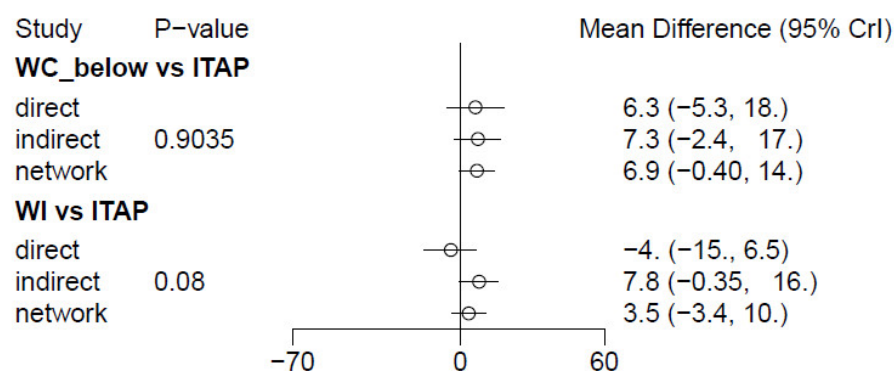

(G) Rankogram in random effect model.

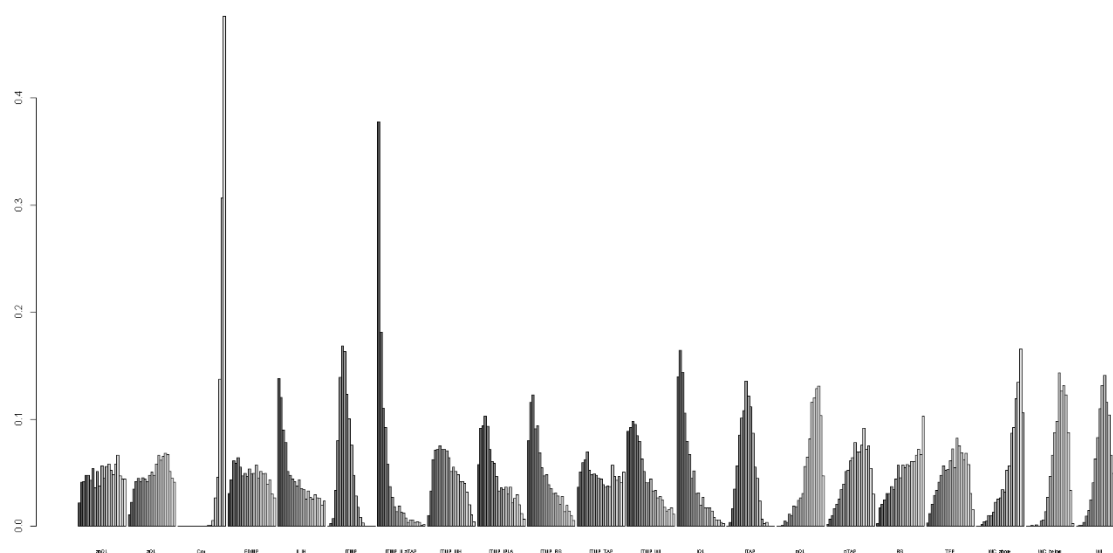

**Figure S6.** Postoperative cumulative 24 h morphine equivalent consumption. (A) Trace plot and density plot in fixed effect model; (B) Trace plot and density plot in random effect model; (C) Gelman-Rubin-Brooks plot in fixed effect model; (D) Gelman-Rubin-Brooks plot in random effect model; (E) Forest plot comparing with control in random effect model; (F) Node splitting plot in random effect model; (G) Rankogram in random effect model.

(A) Trace plot and density plot in fixed effect model.

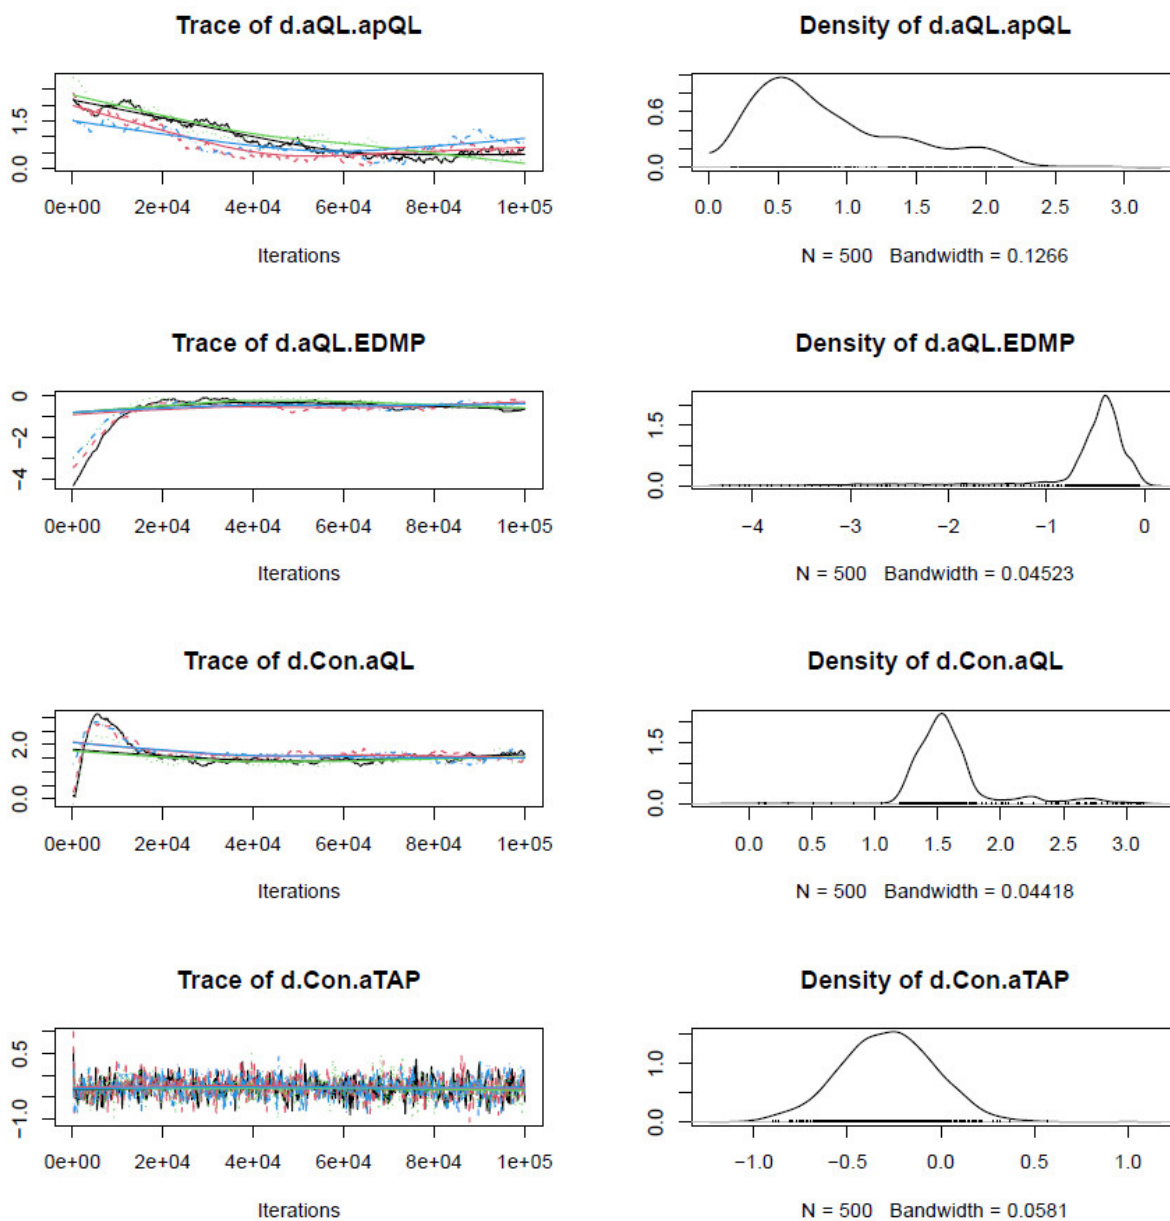

Figure S7. Cont.

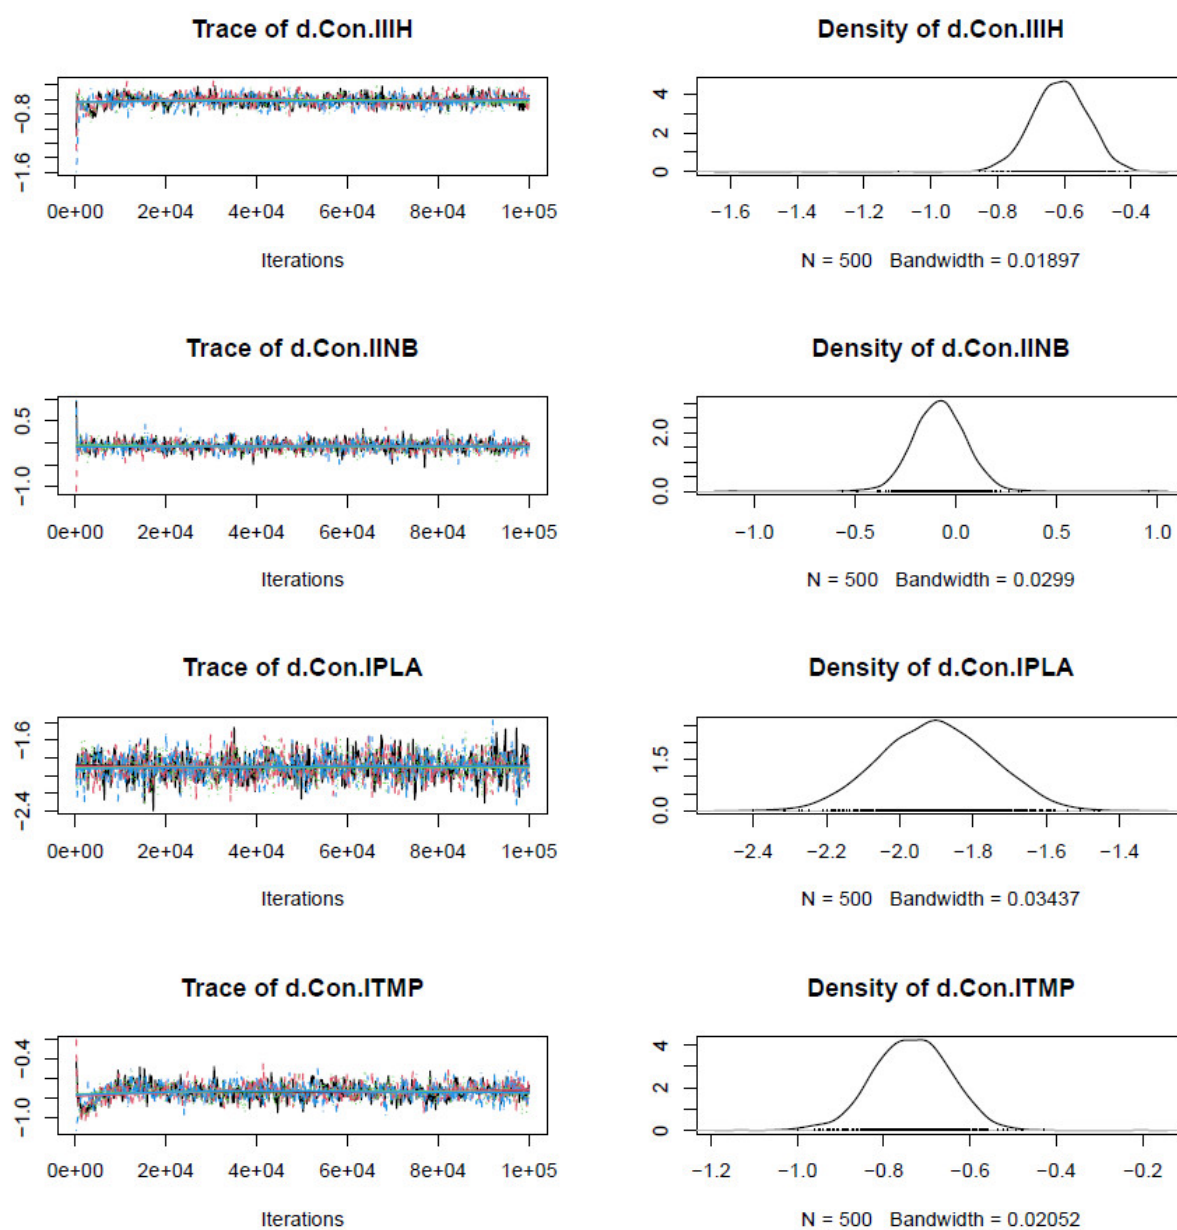

Figure S7. Cont.

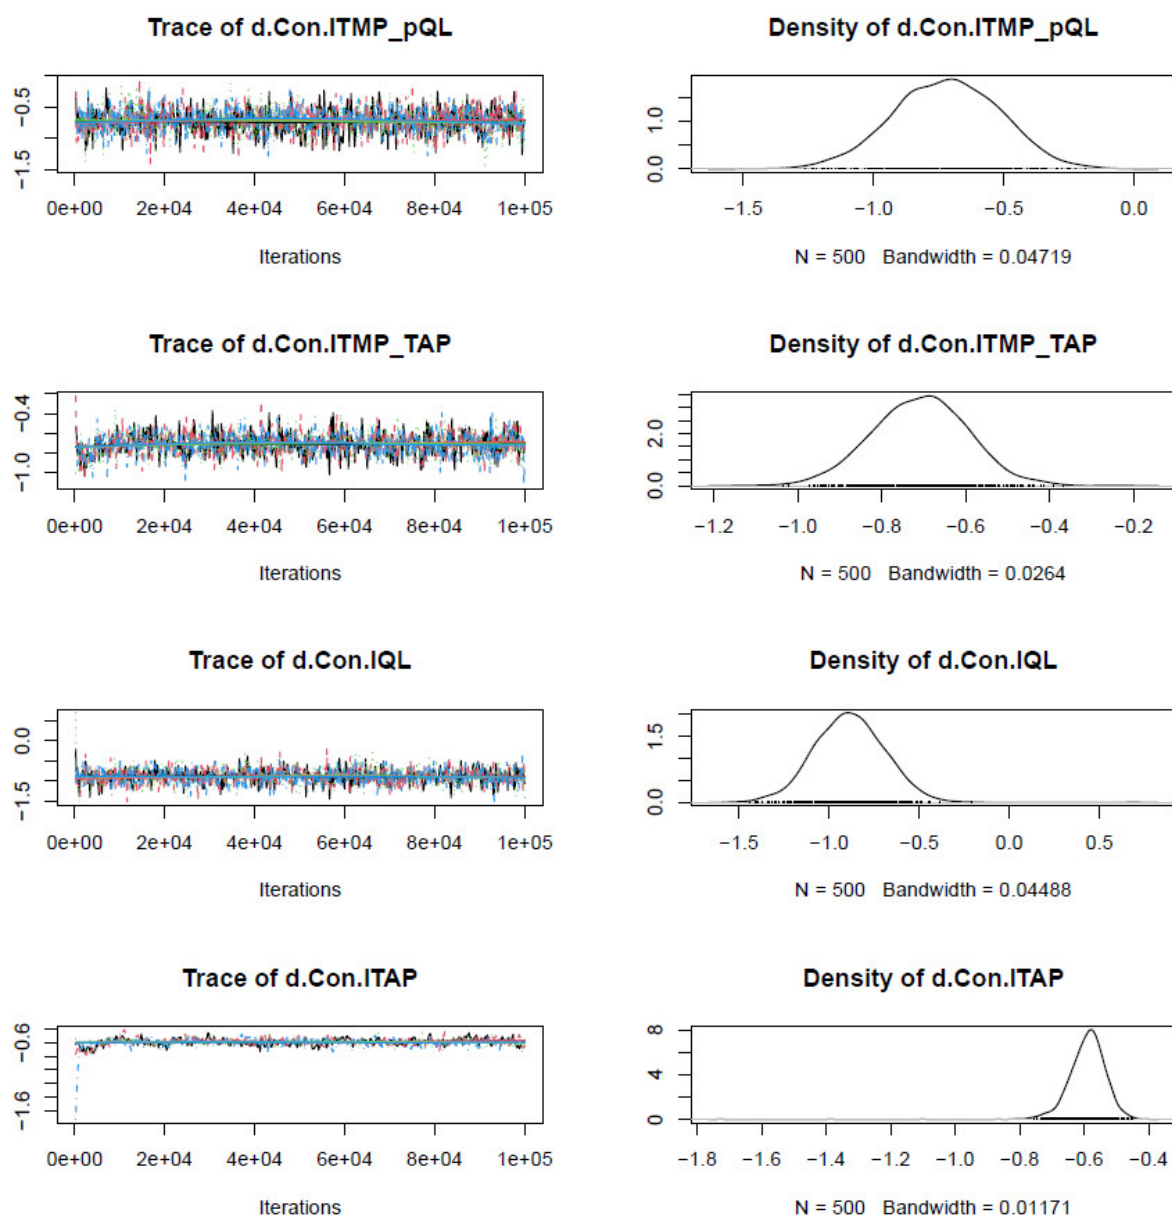

Figure S7. Cont.

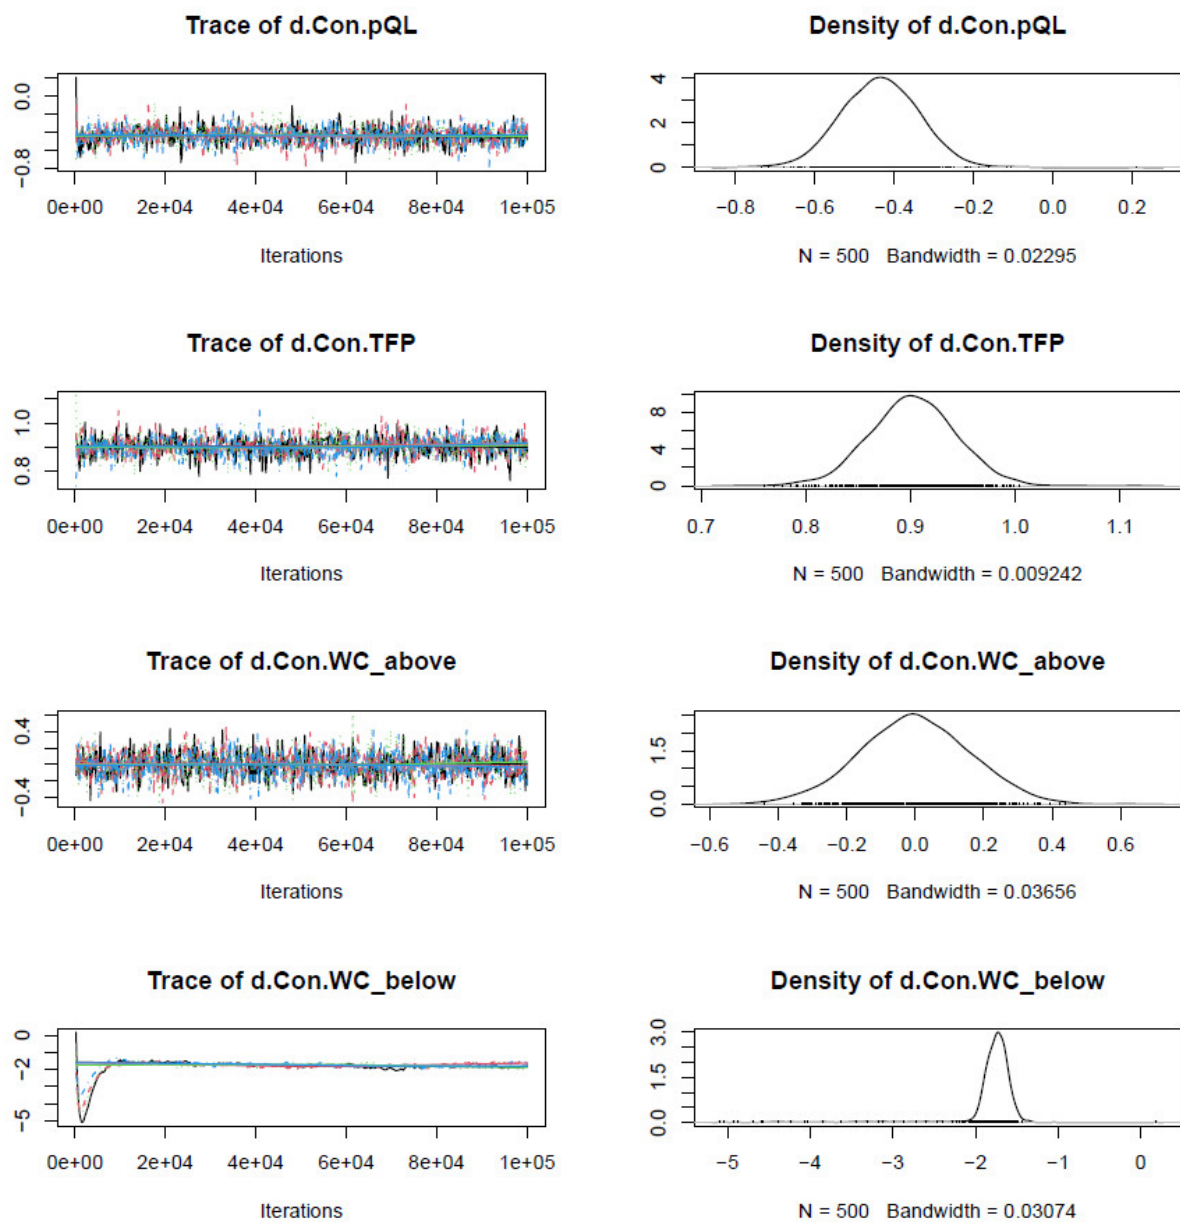

Figure S7. Cont.

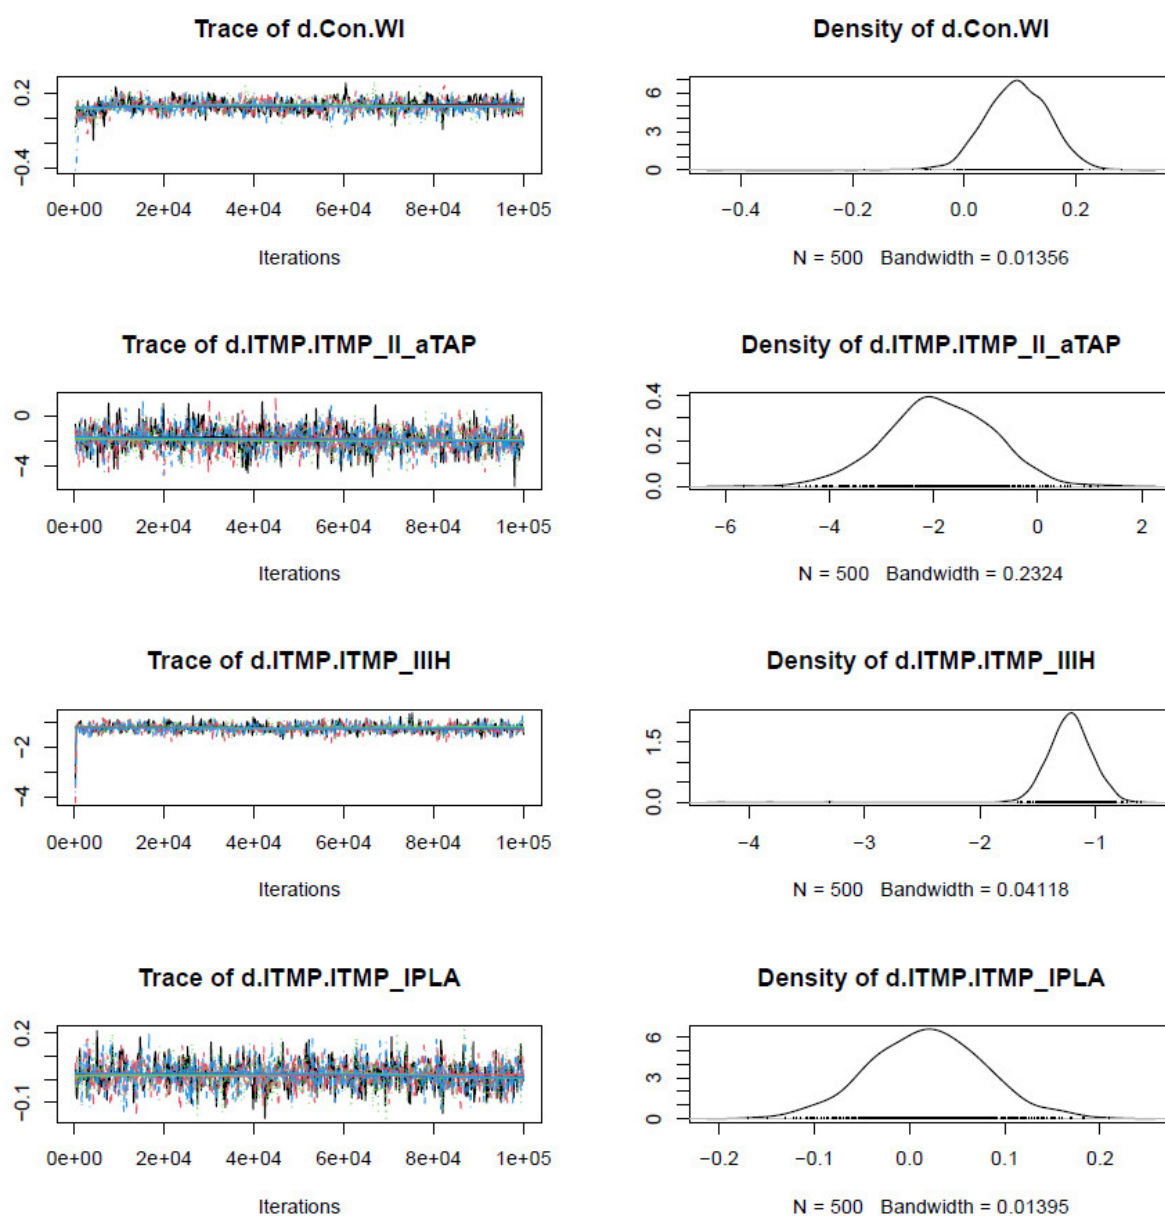

Figure S7. Cont.

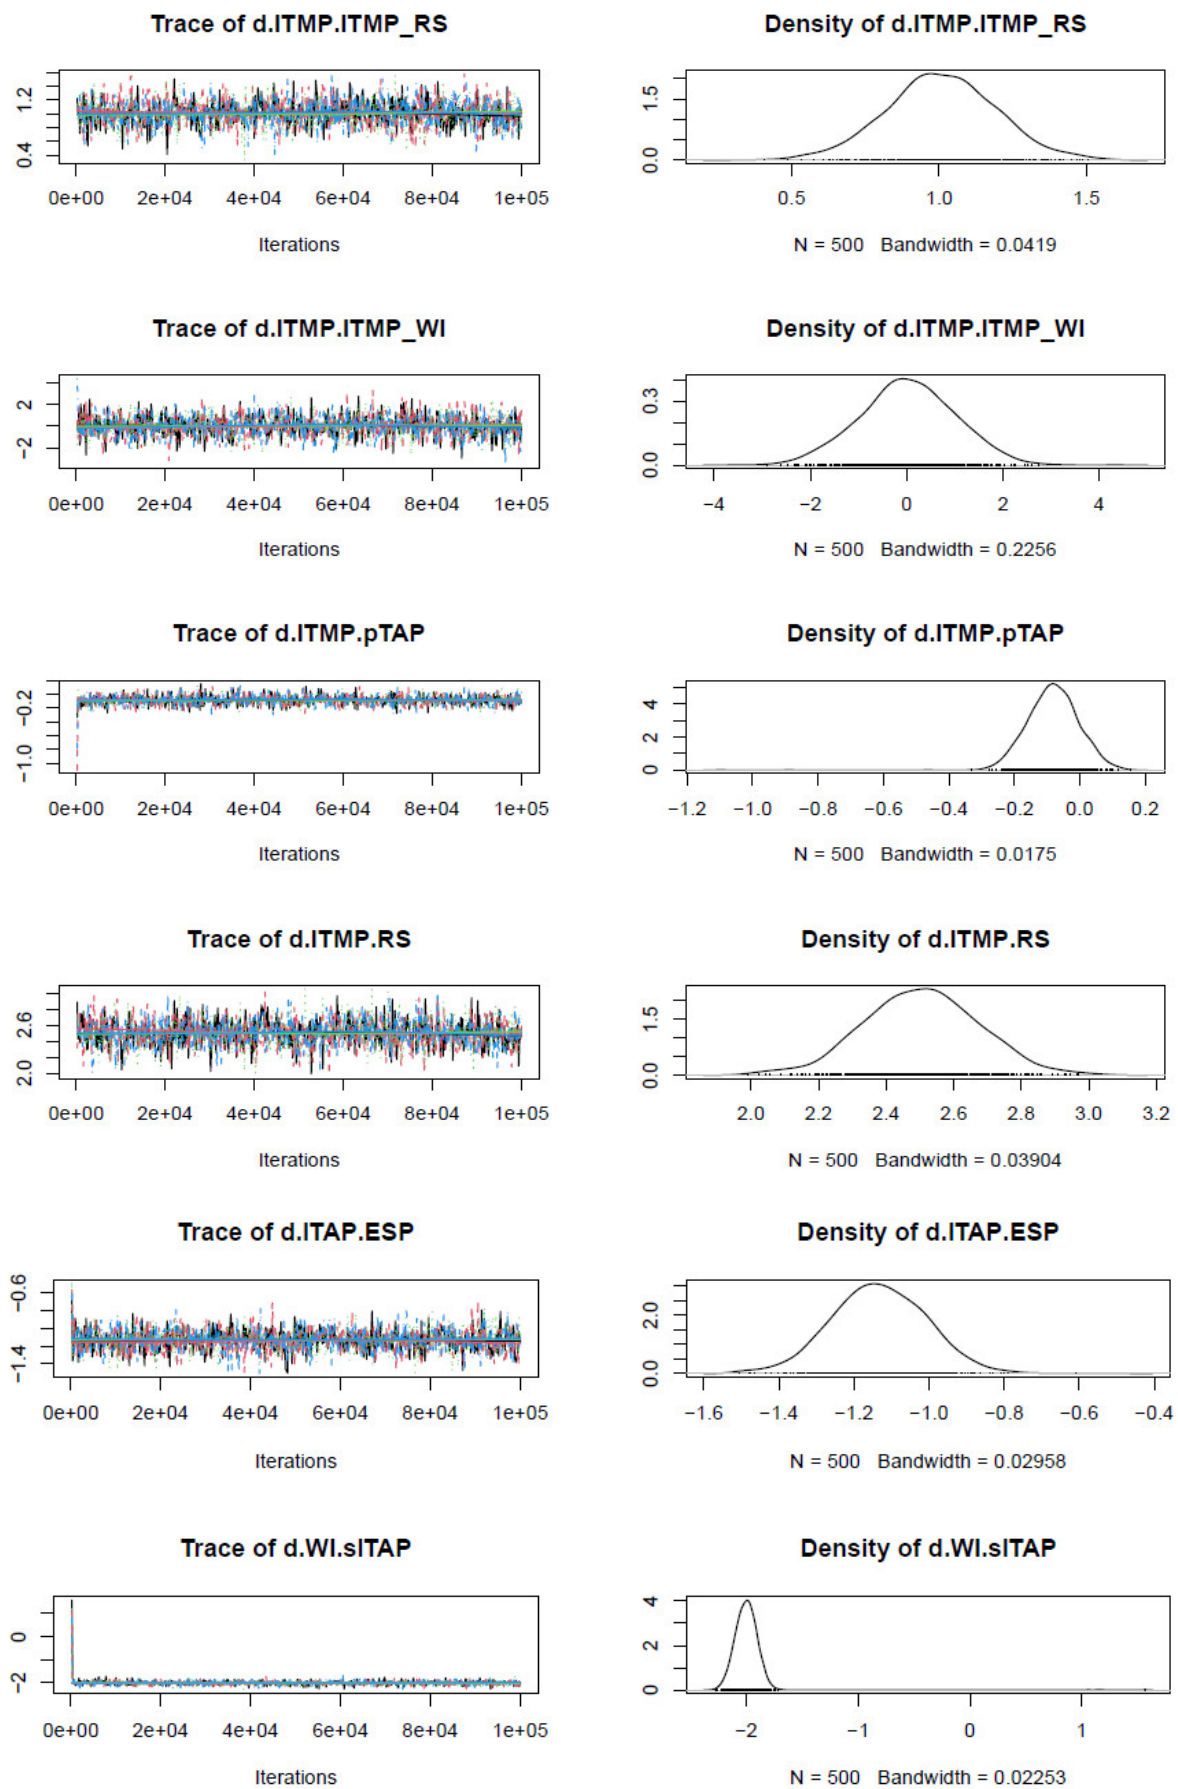

Figure S7. Cont.

(B) Trace plot and density plot in random effect model.

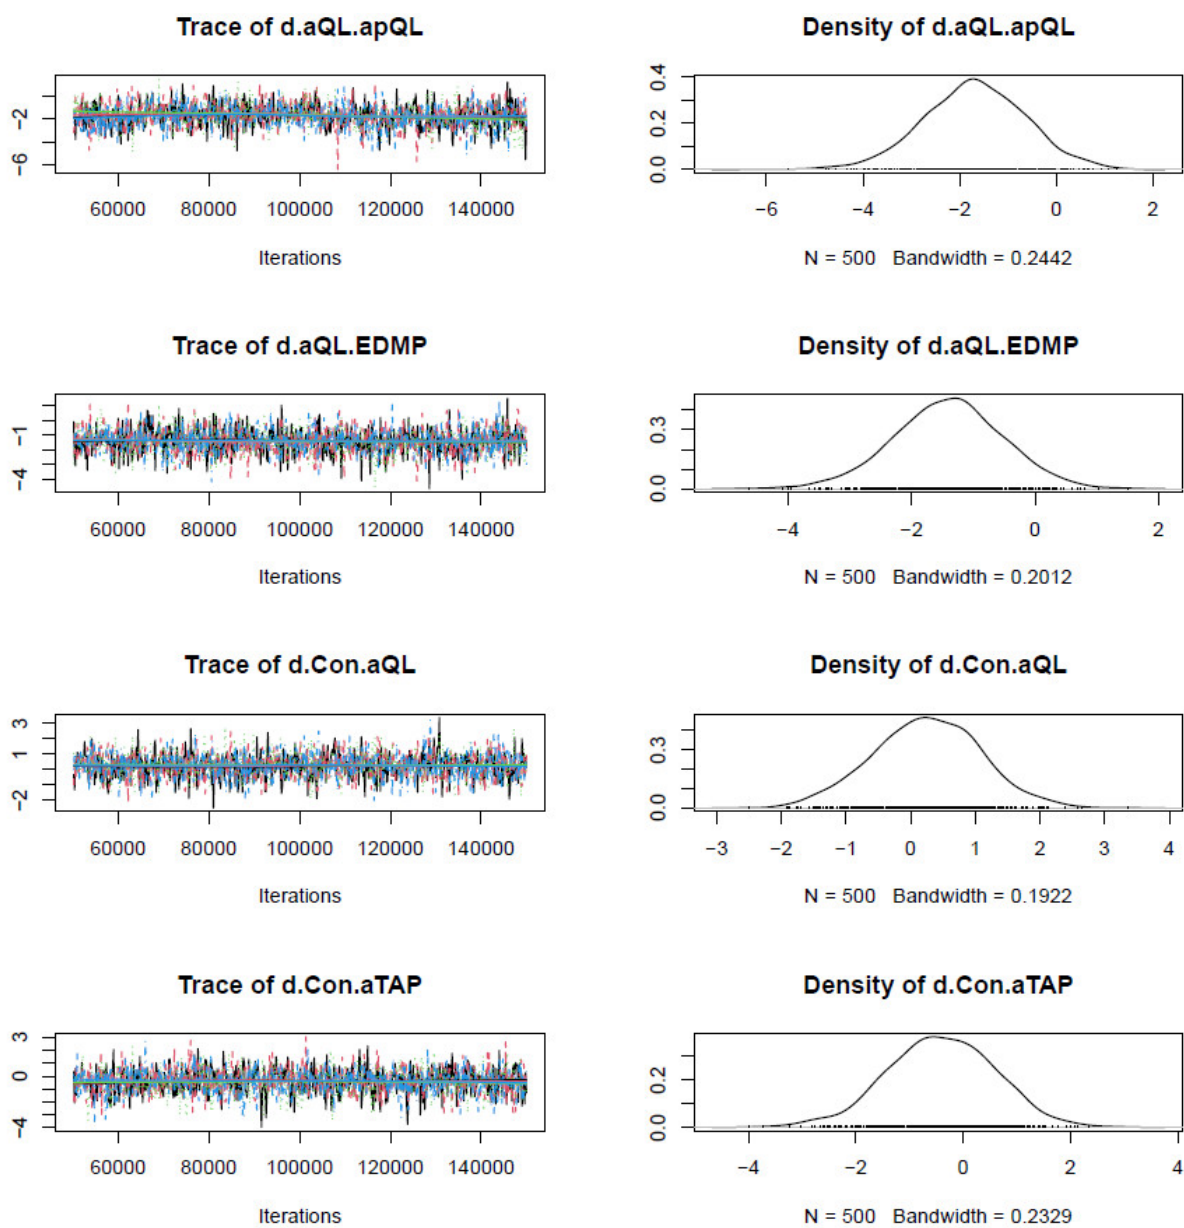

Figure S7. Cont.

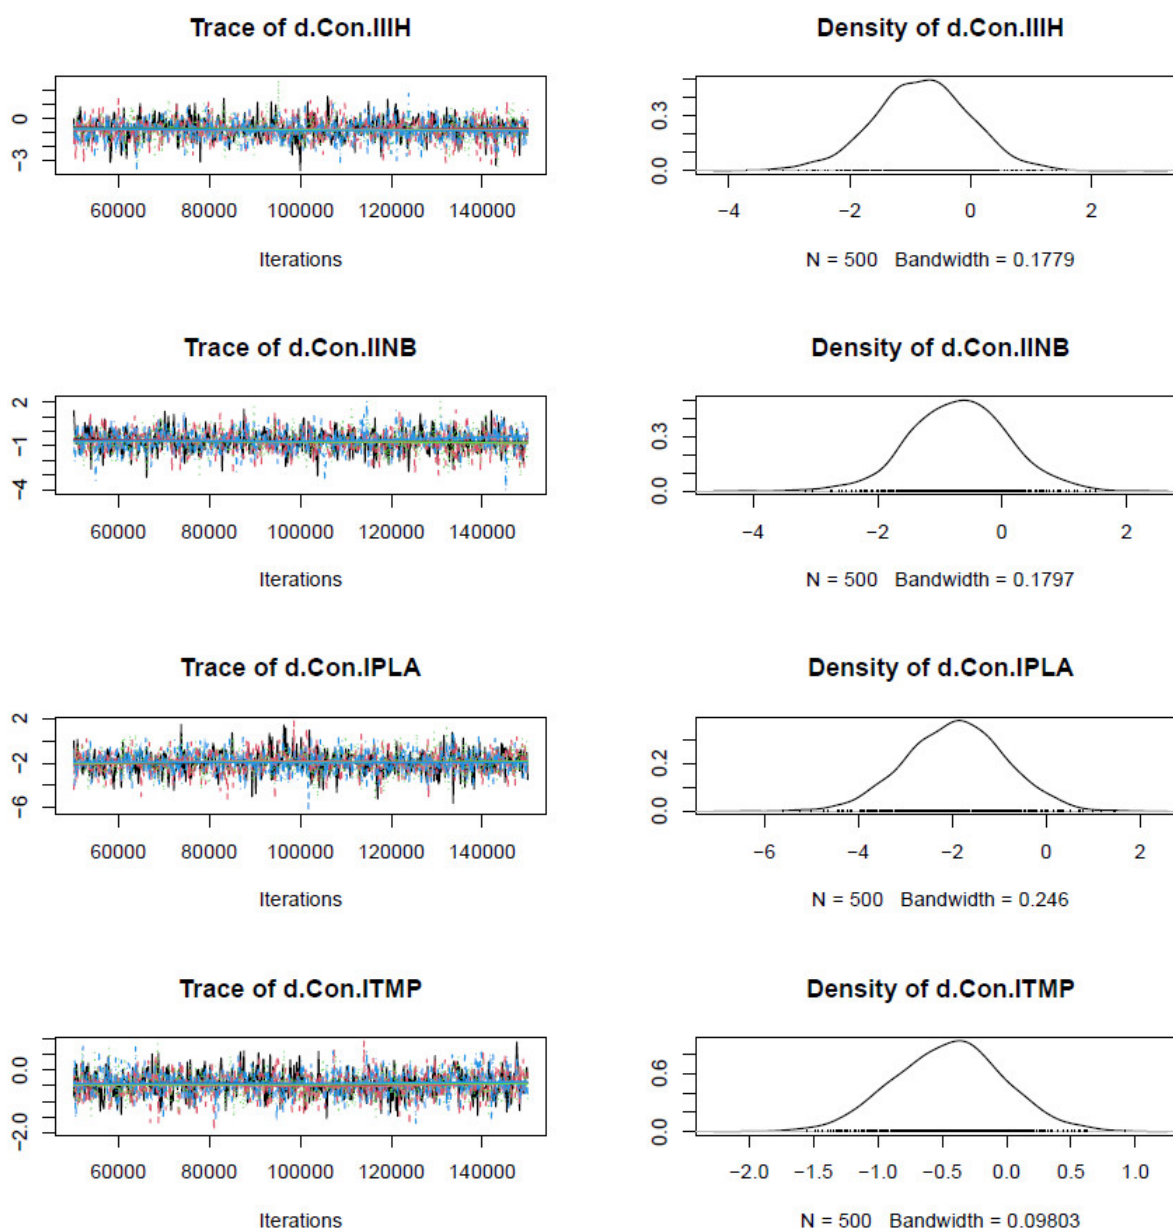

Figure S7. Cont.

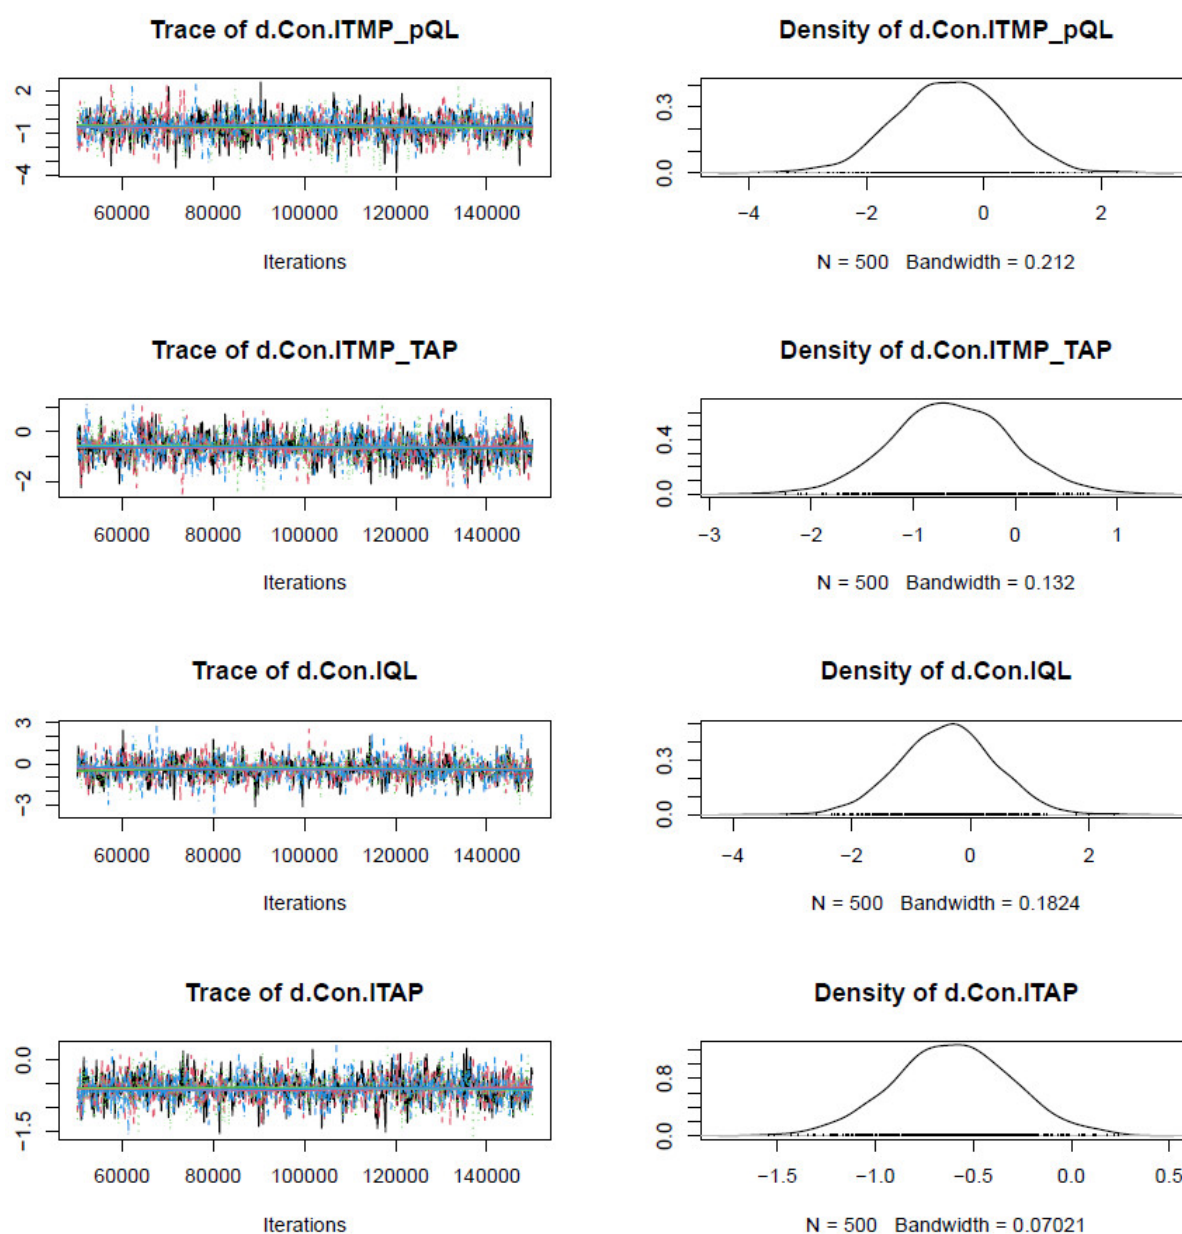

Figure S7. Cont.

**Trace of d.Con.pQL**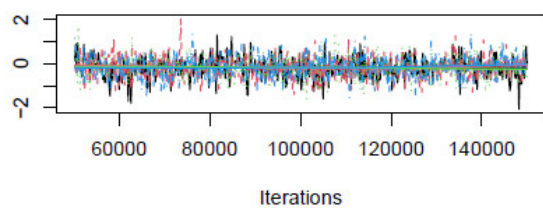**Density of d.Con.pQL**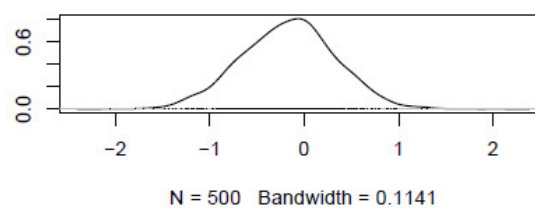**Trace of d.Con.TFP**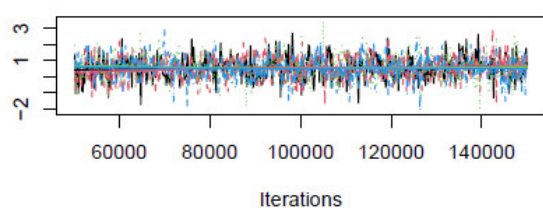**Density of d.Con.TFP**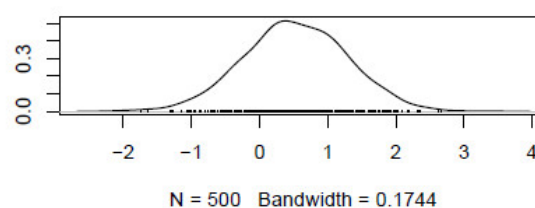**Trace of d.Con.WC\_above**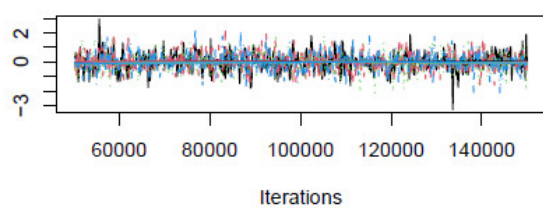**Density of d.Con.WC\_above**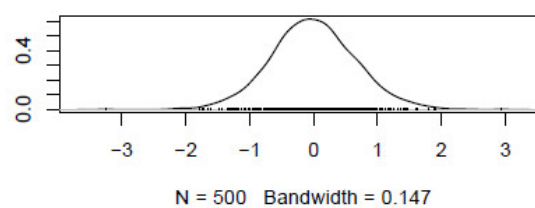**Trace of d.Con.WC\_below**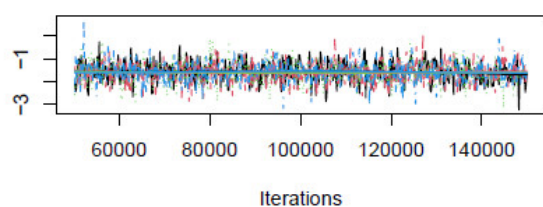**Density of d.Con.WC\_below**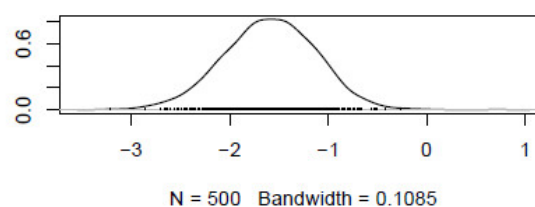

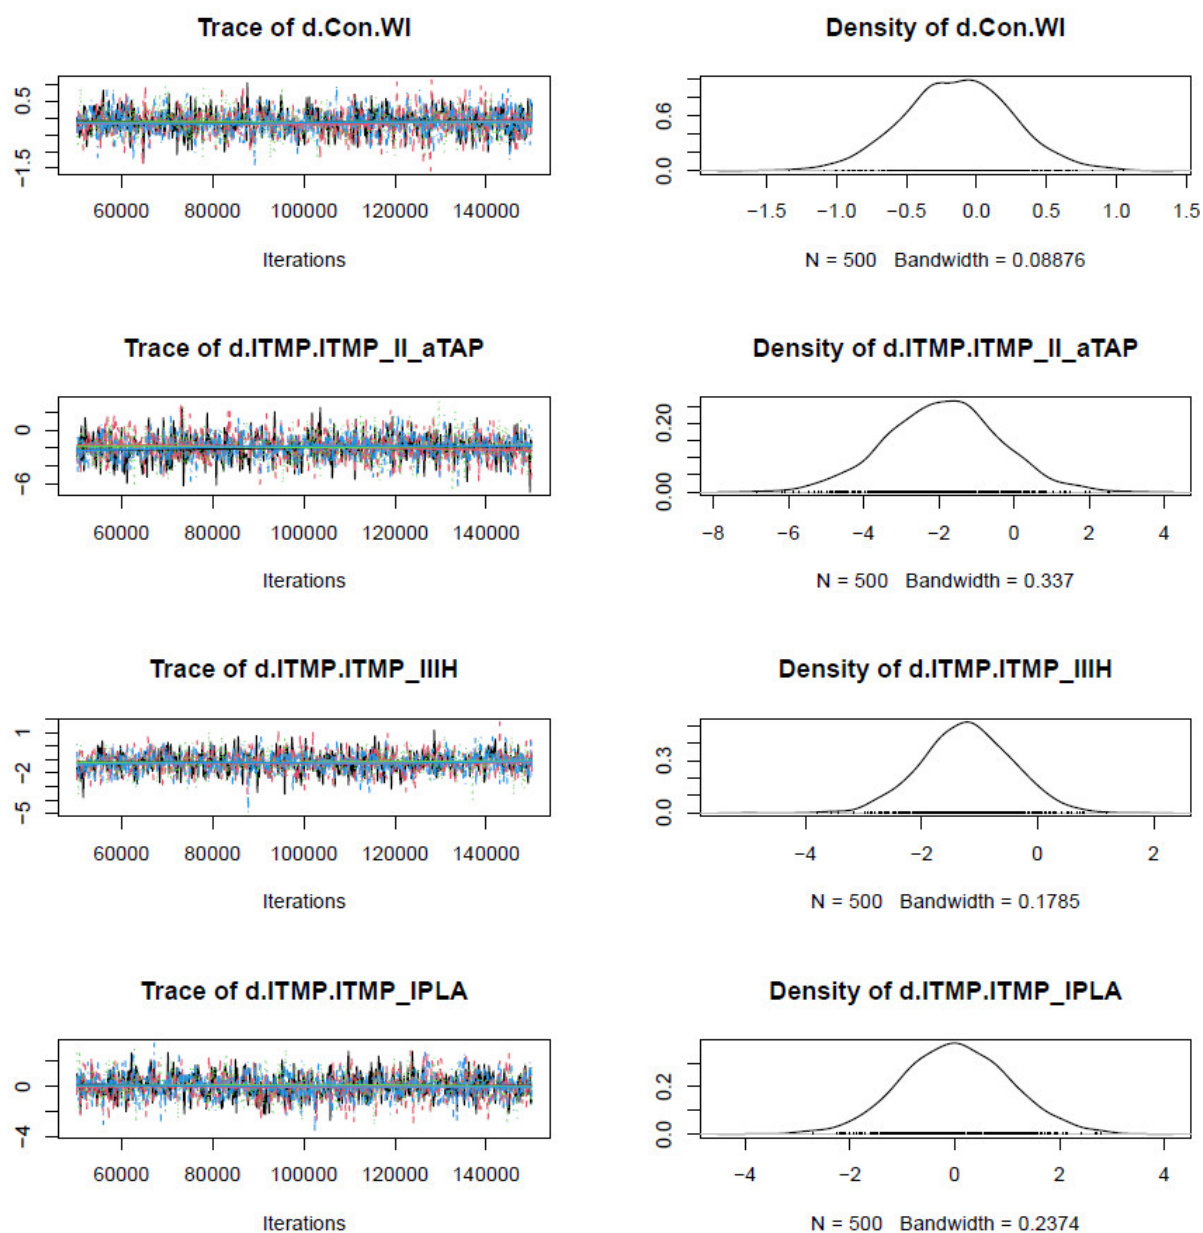

Figure S7. Cont.

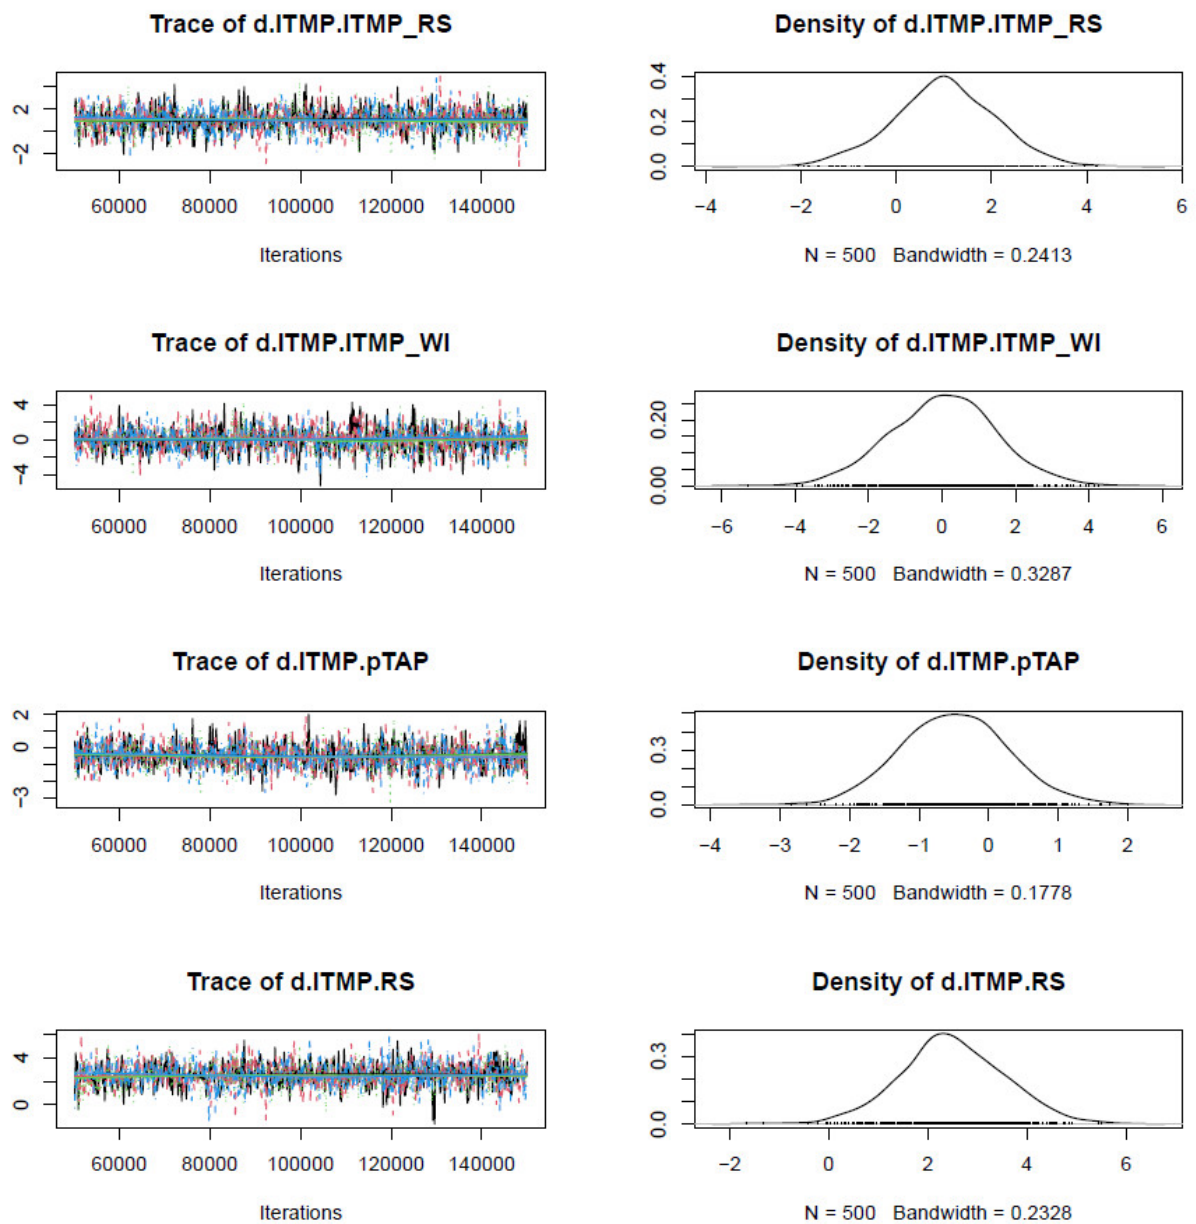

Figure S7. Cont.

(C) Gelman-Rubin-Brooks plot in fixed effect model.

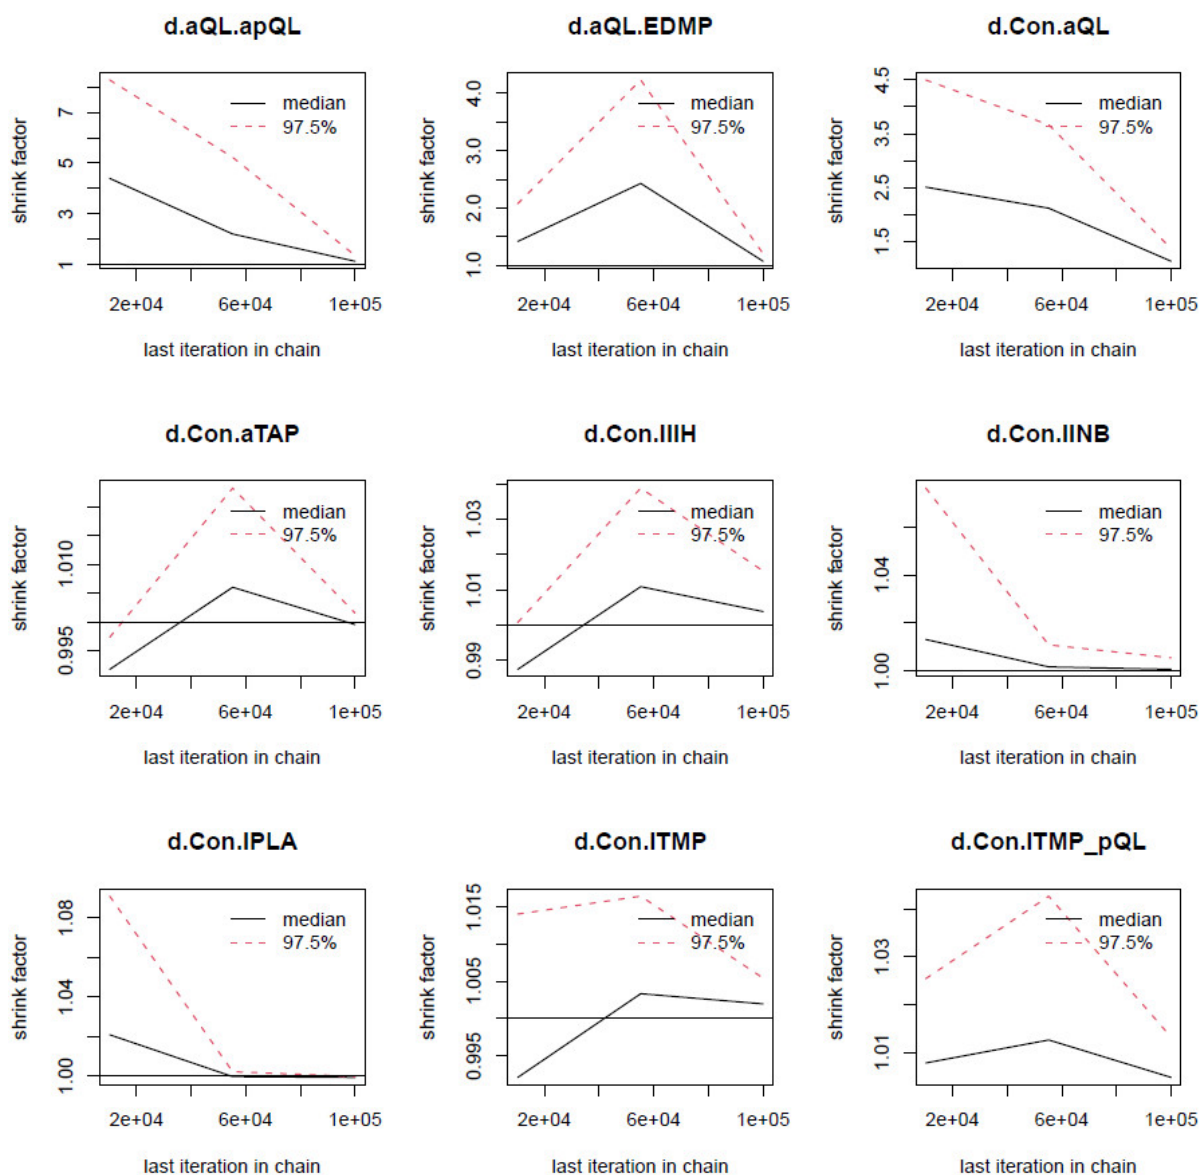

Figure S7. Cont.

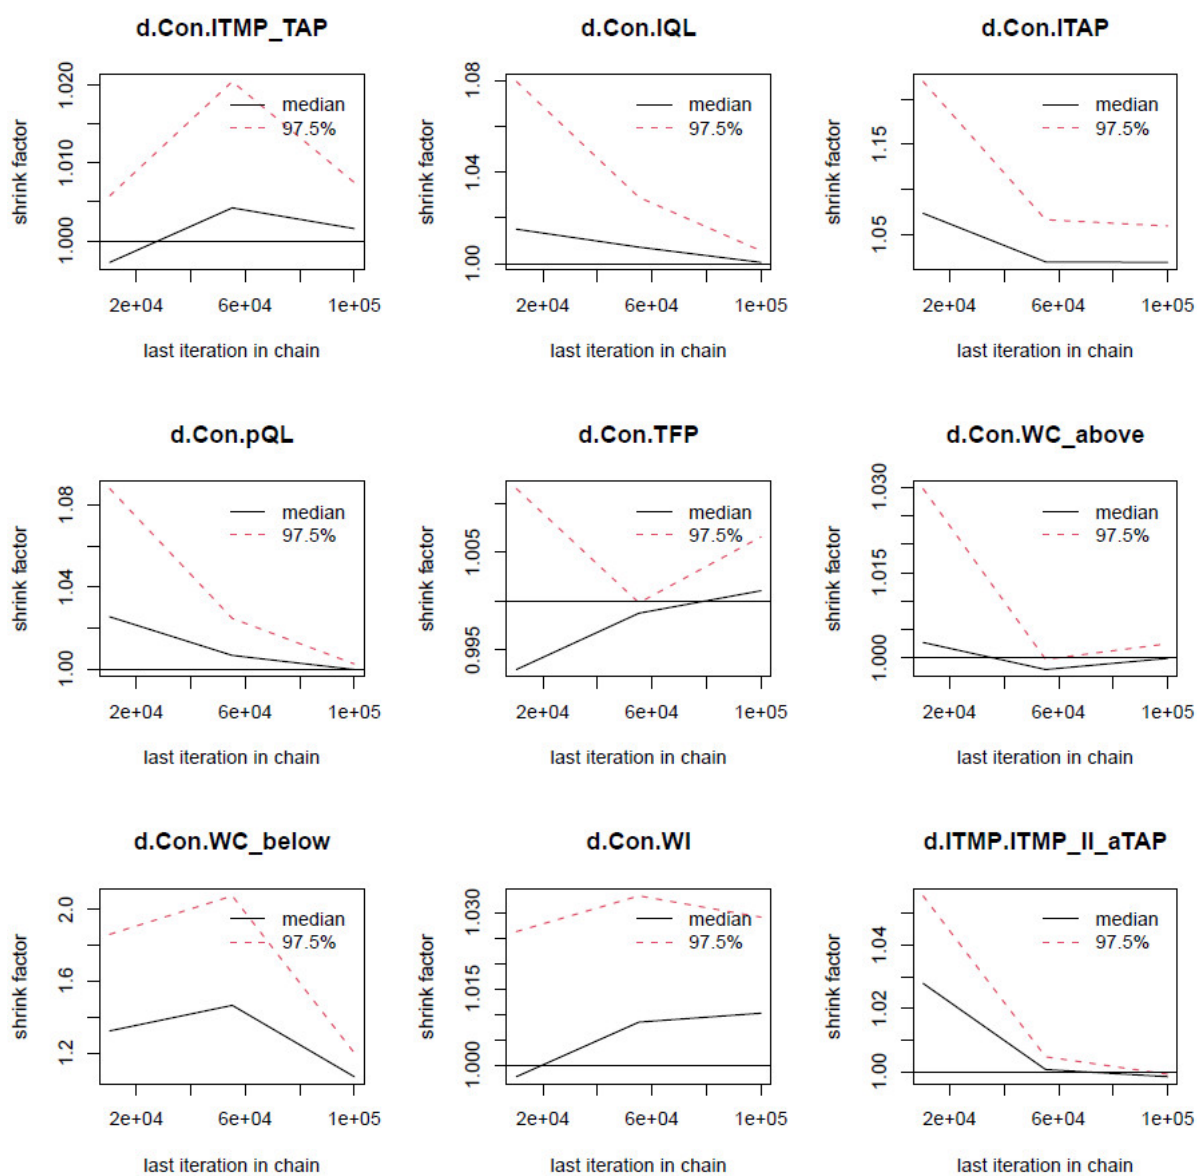

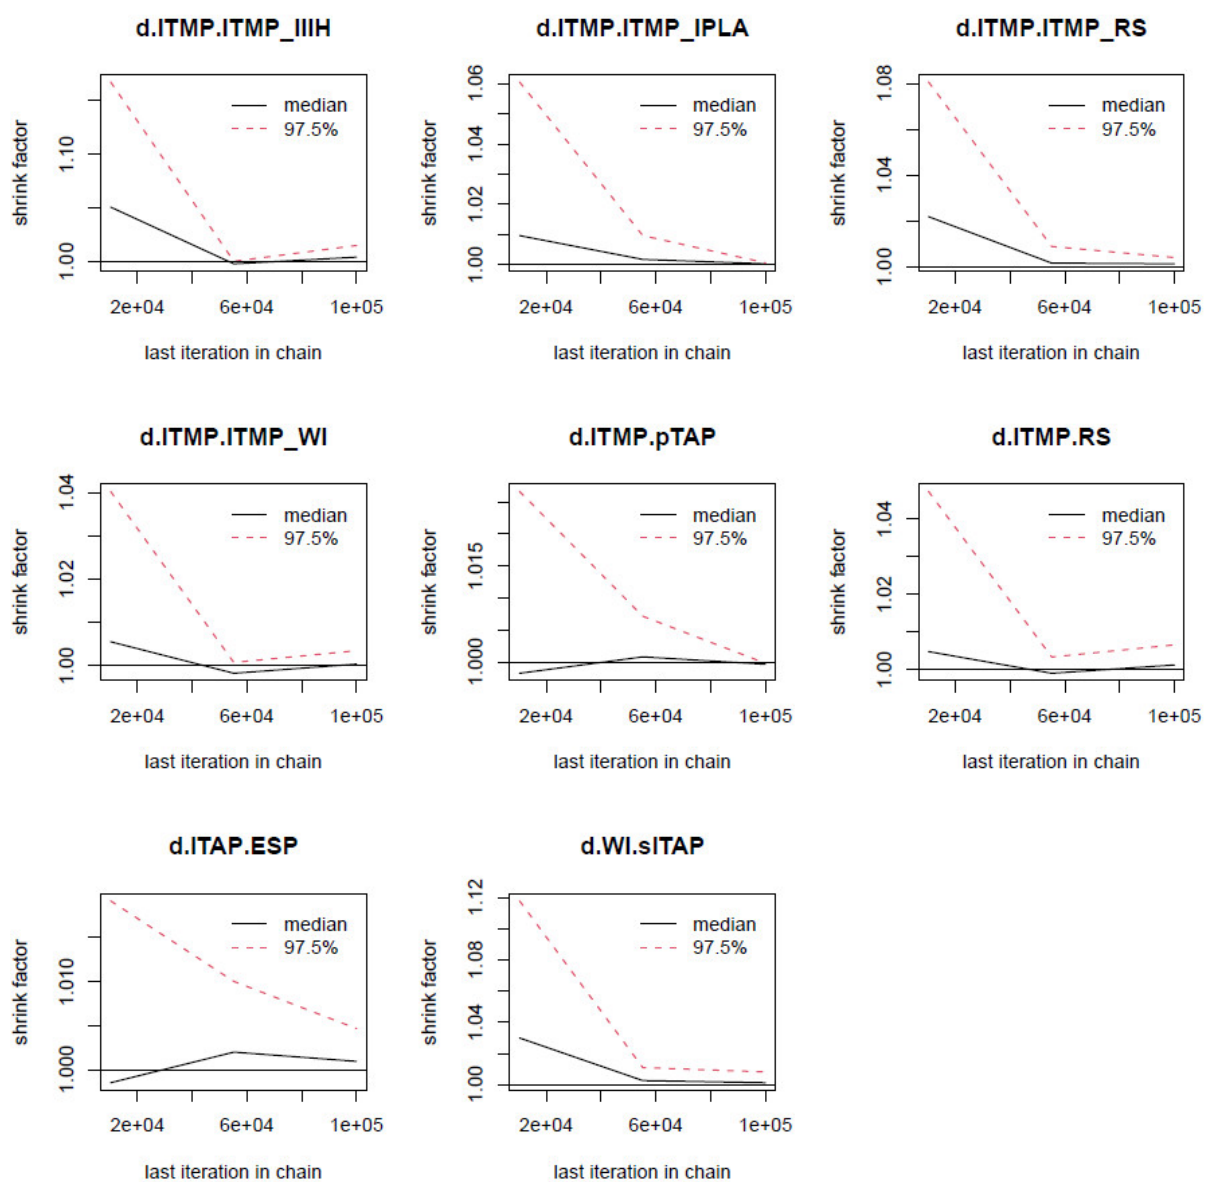

Figure S7. Cont.

(D) Gelman-Rubin-Brooks plot in random effect model.

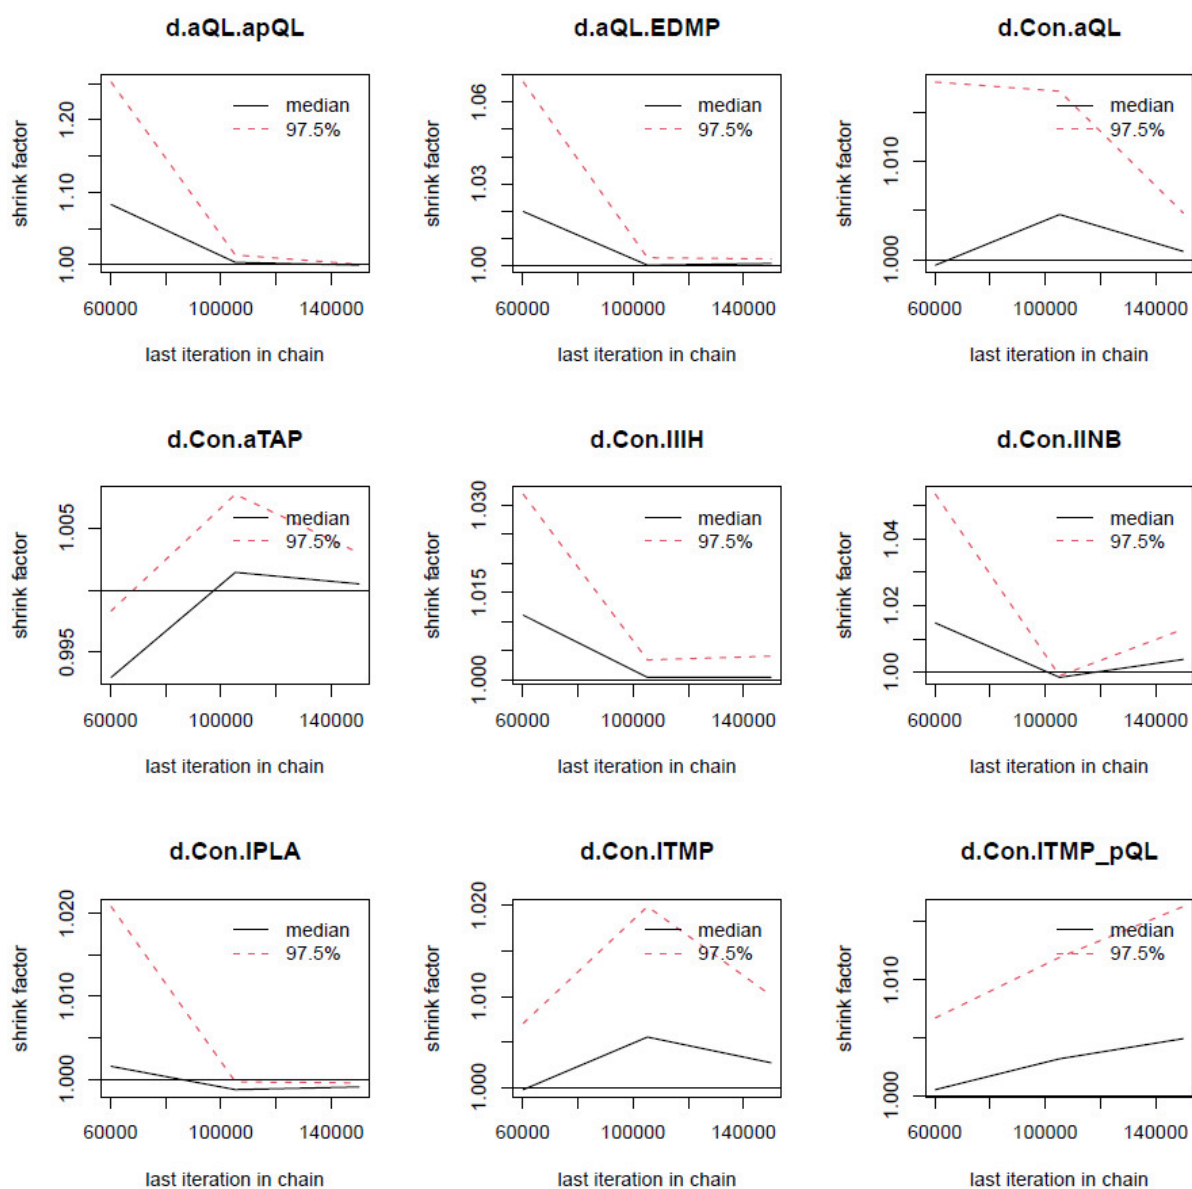

Figure S7. Cont.

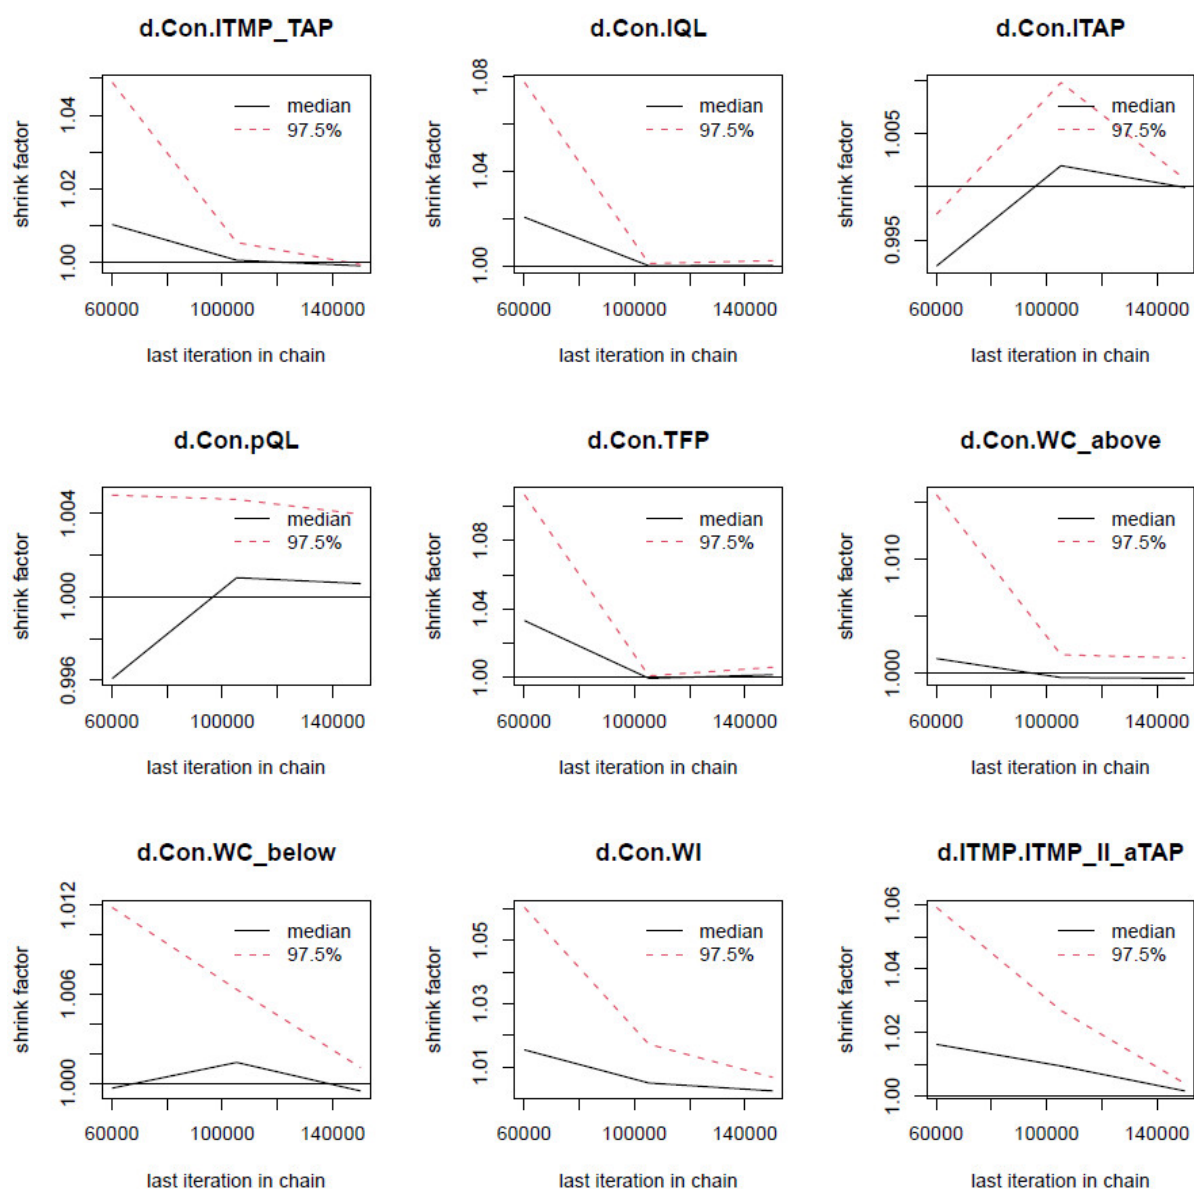

Figure S7. Cont.

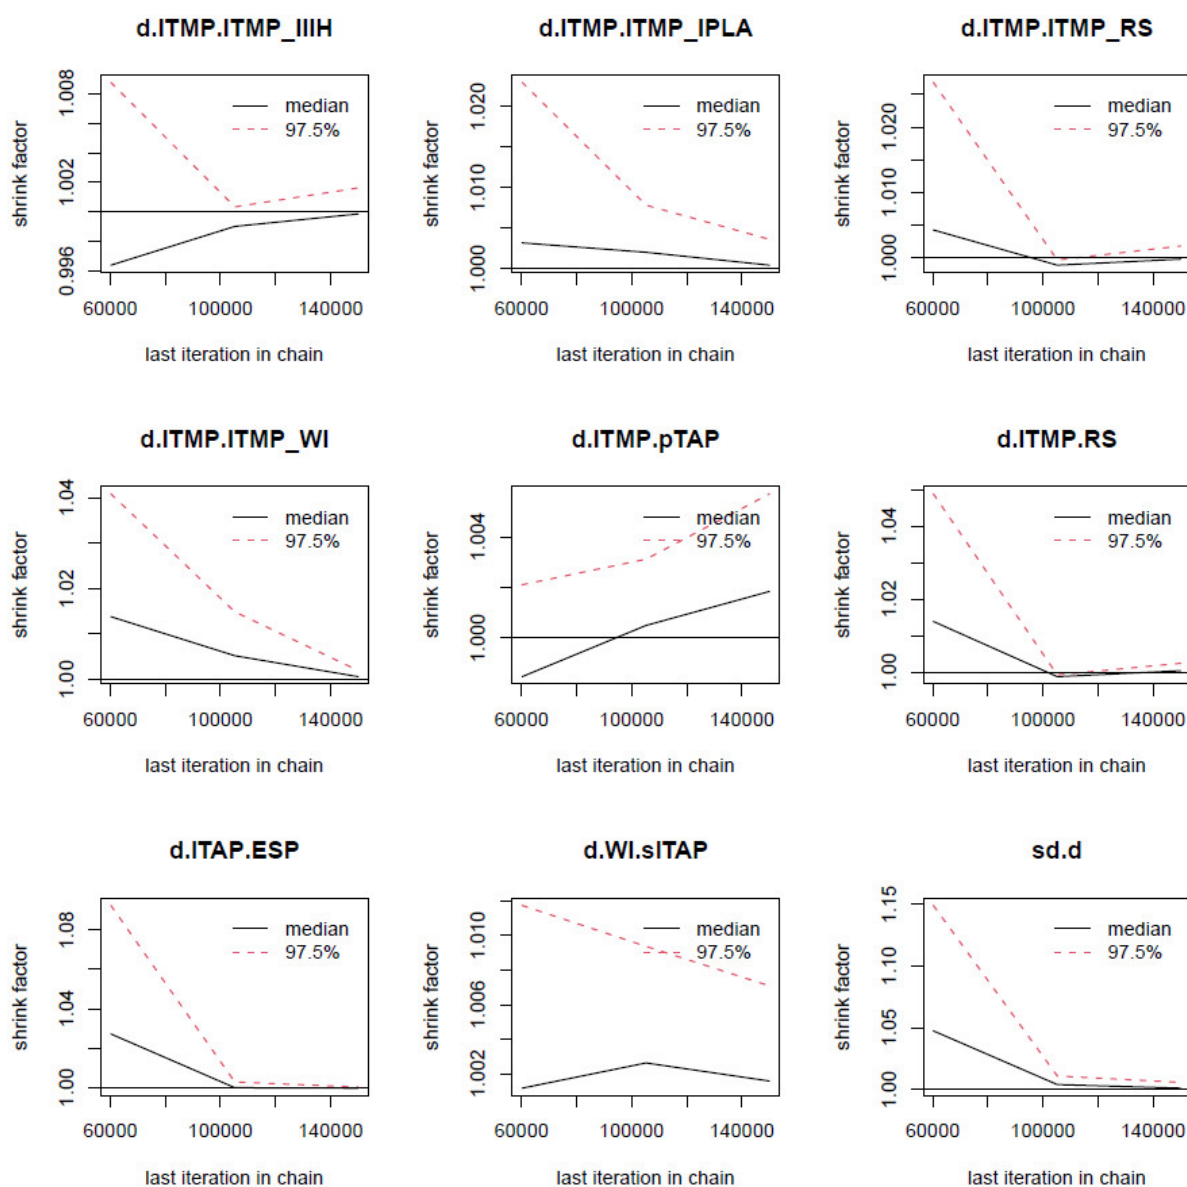

Figure S7. Cont.

(E) Forest plot comparing with control in random effect model.

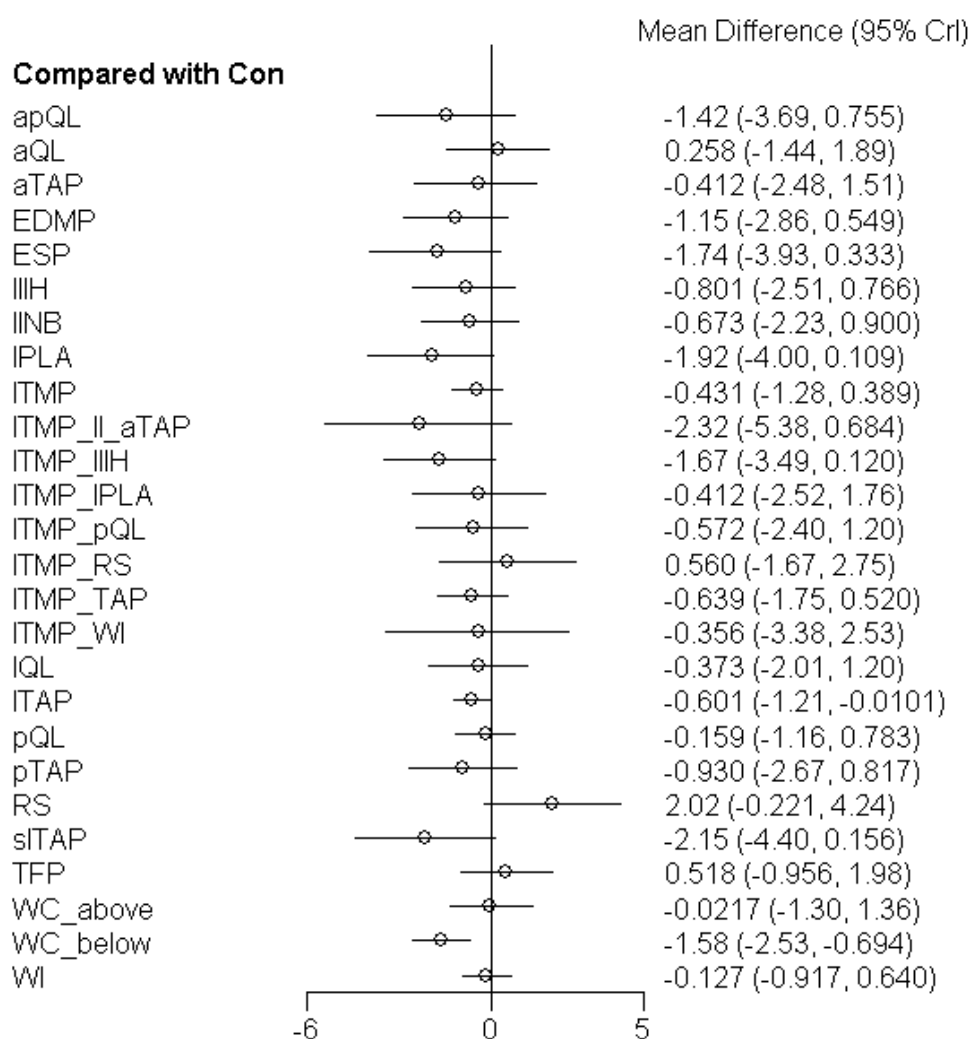

Figure S7. Cont.

(F) Node splitting plot in random effect model.

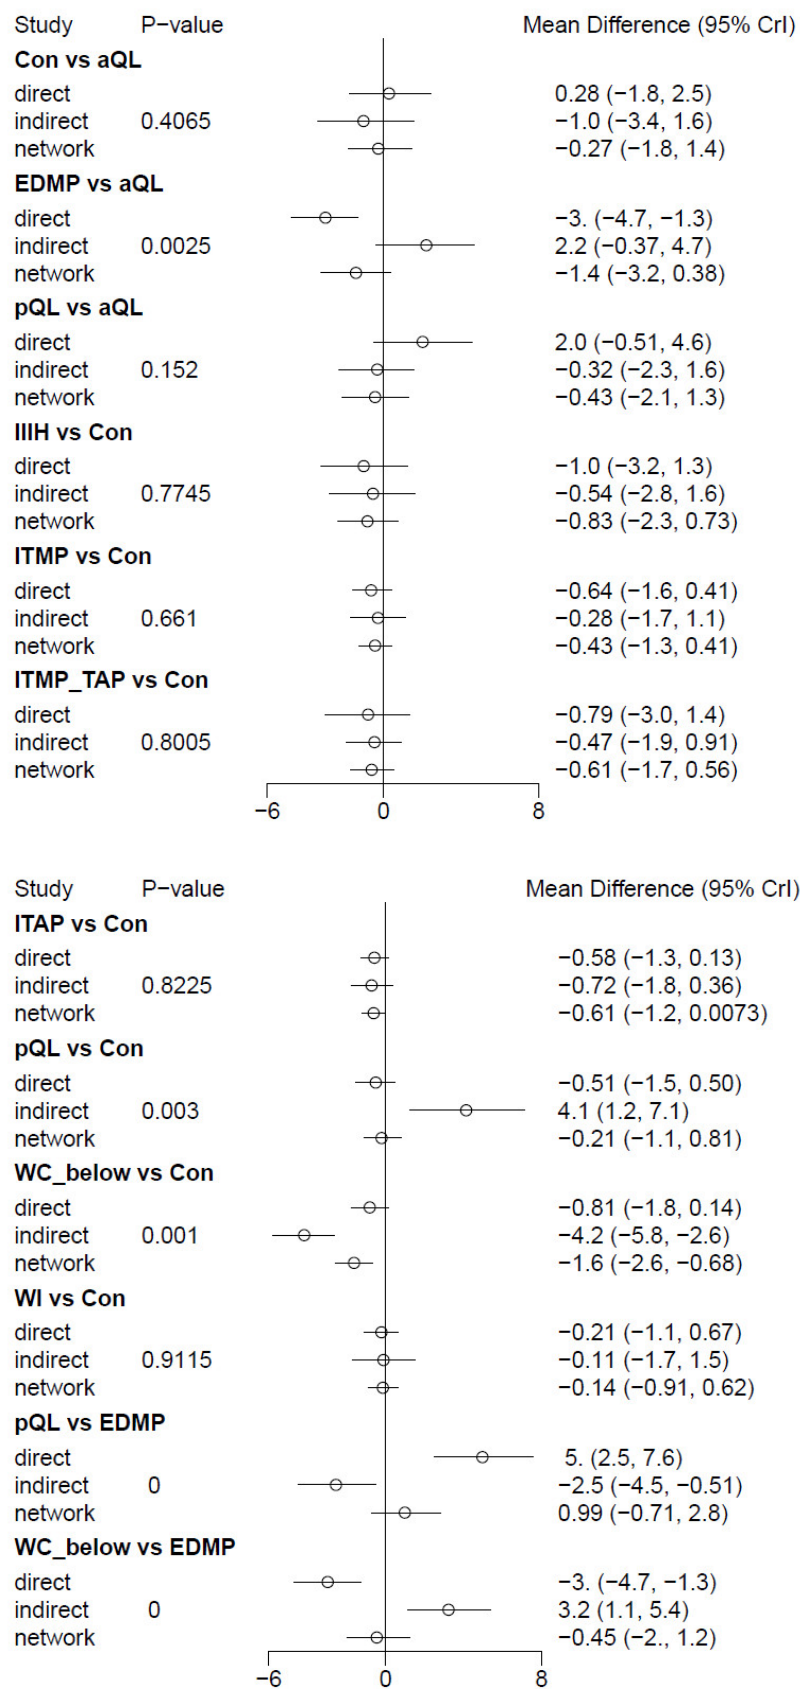

Figure S7. Cont.

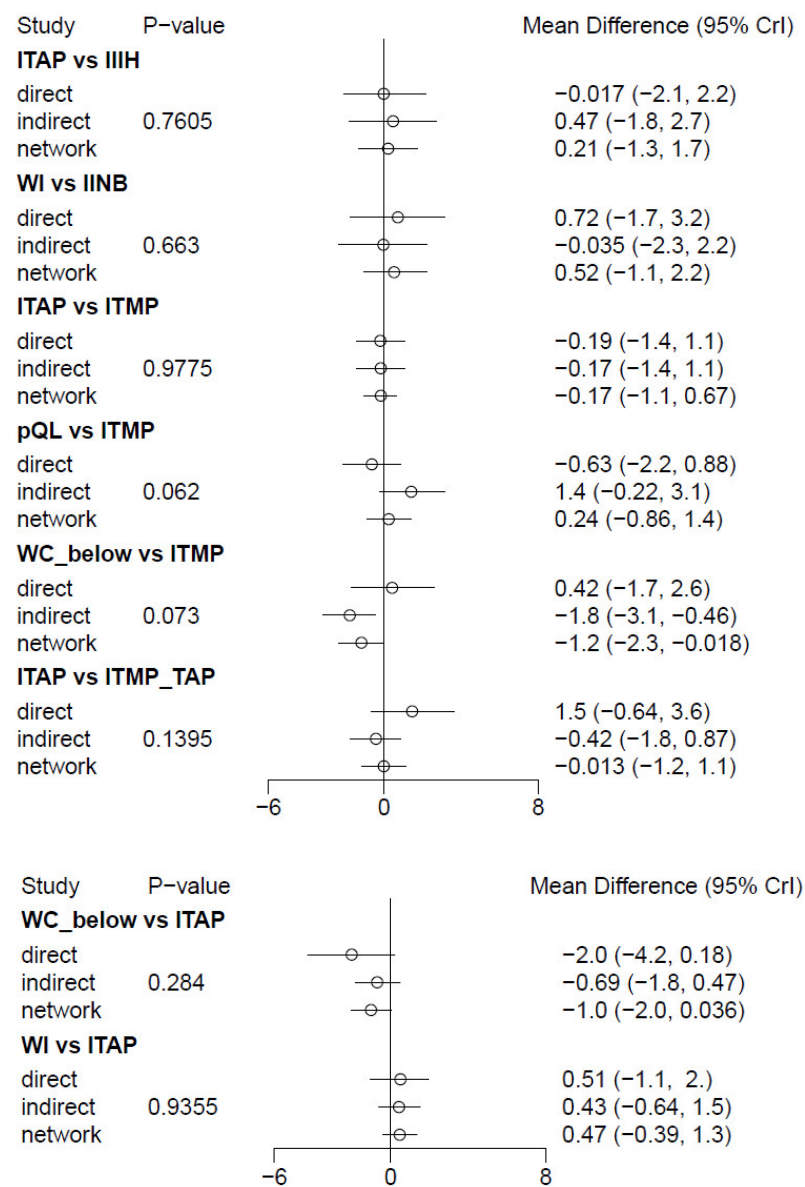

Figure S7. Cont.

(G) Rankogram in random effect model.

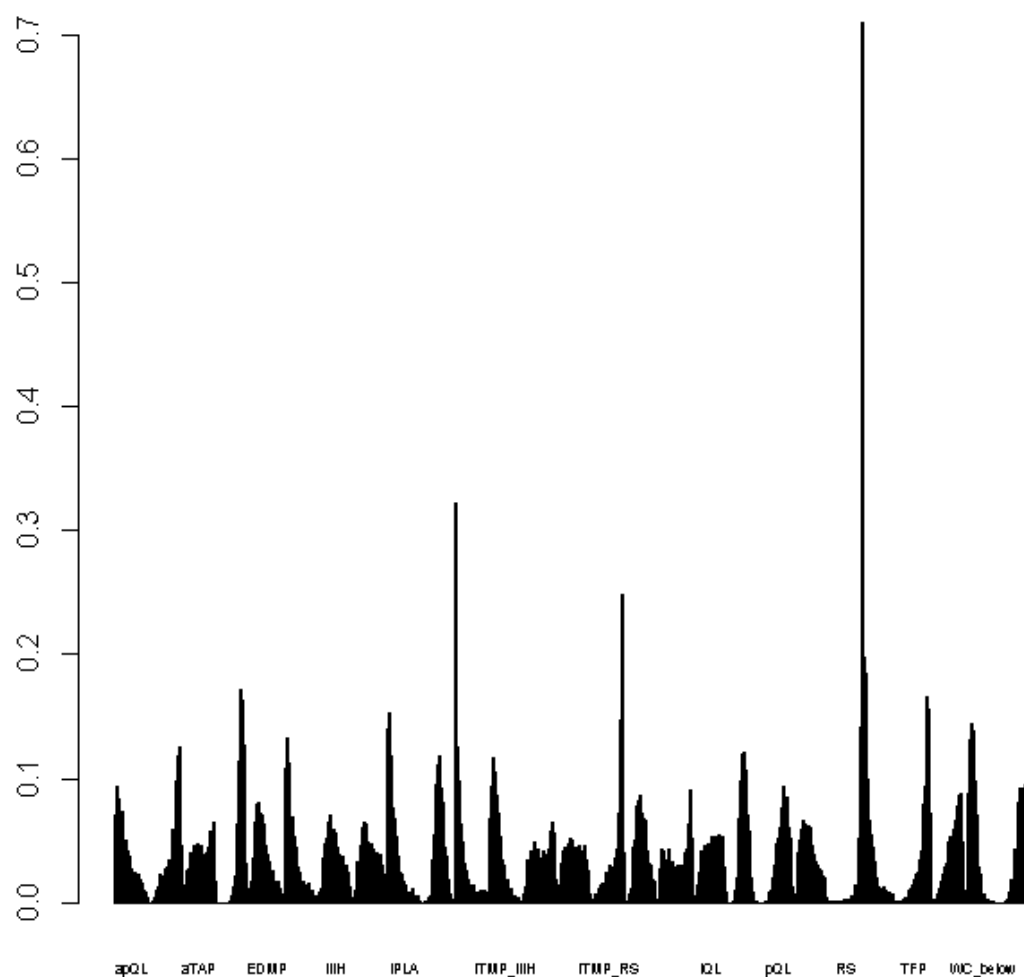

**Figure S7.** Pain at rest 24 h after surgery. (A) Trace plot and density plot in fixed effect model; (B) Trace plot and density plot in random effect model; (C) Gelman-Rubin-Brooks plot in fixed effect model, (D) Gelman-Rubin-Brooks plot in random effect model; (E) Forest plot comparing with control in random effect model; (F) Node splitting plot in random effect model; (G) Rankogram in random effect model.

(A) Trace plot and density plot in fixed effect model.

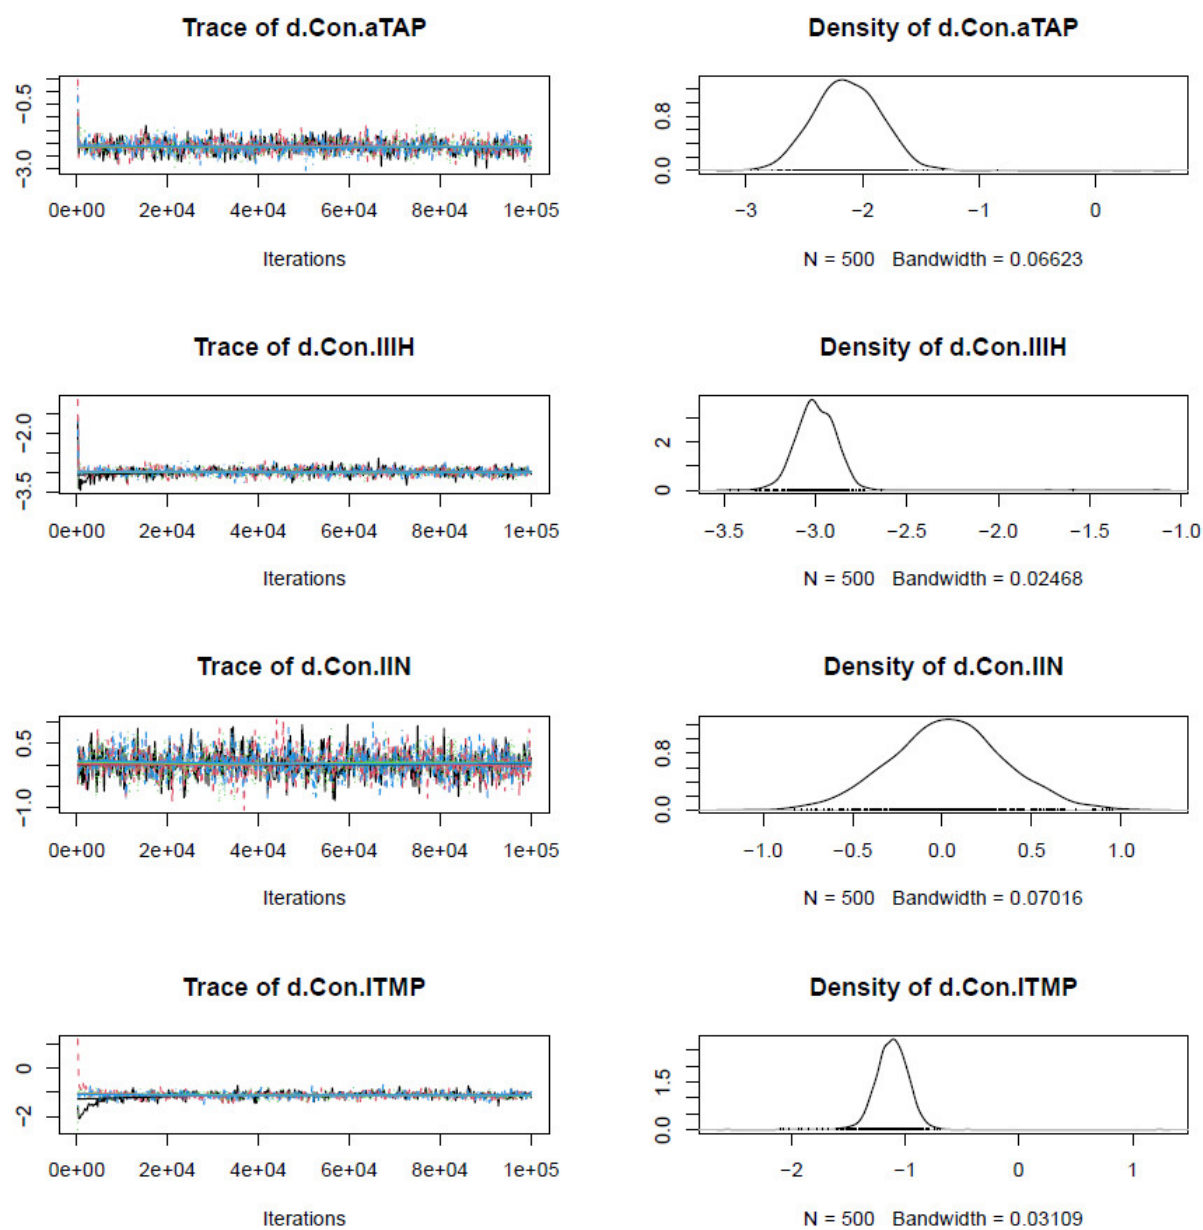

Figure S8. Cont.

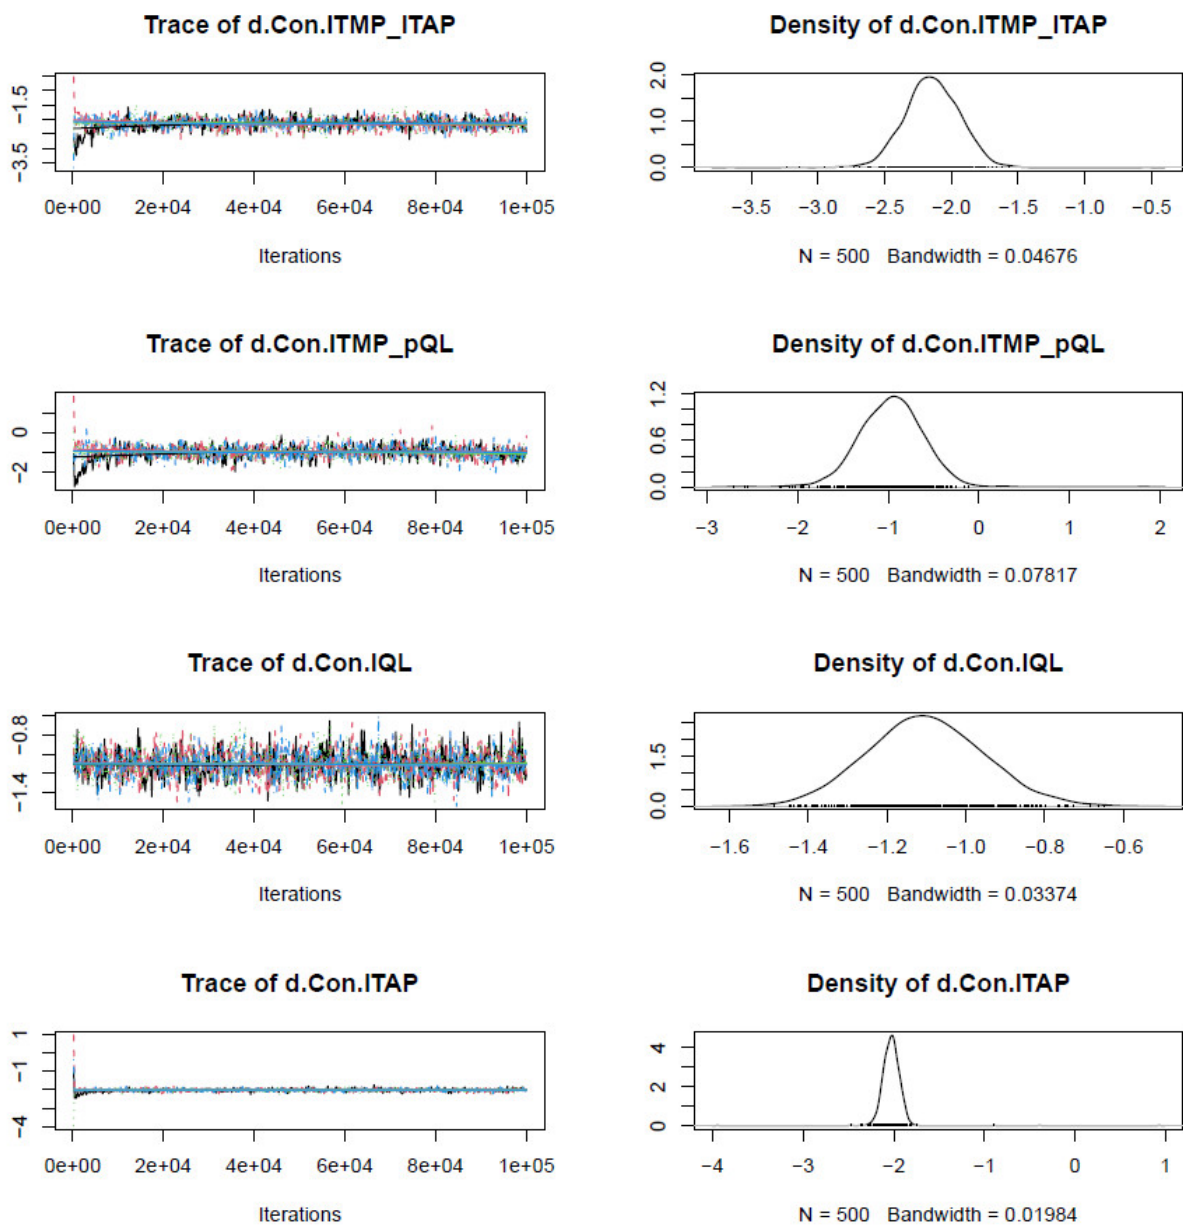

Figure S8. Cont.

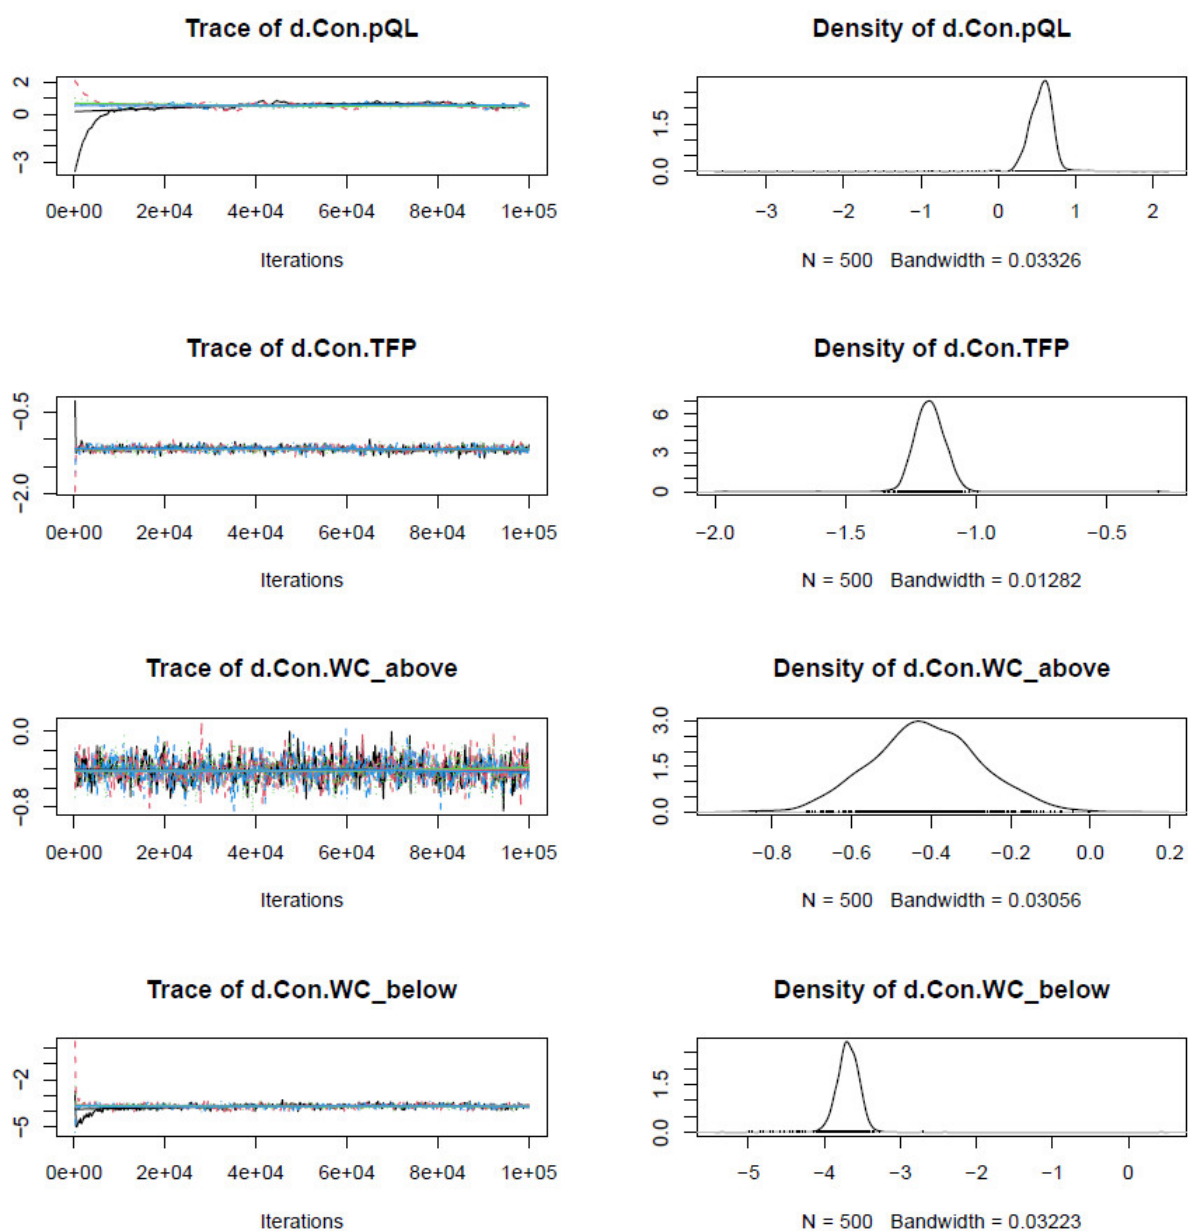

Figure S8. Cont.

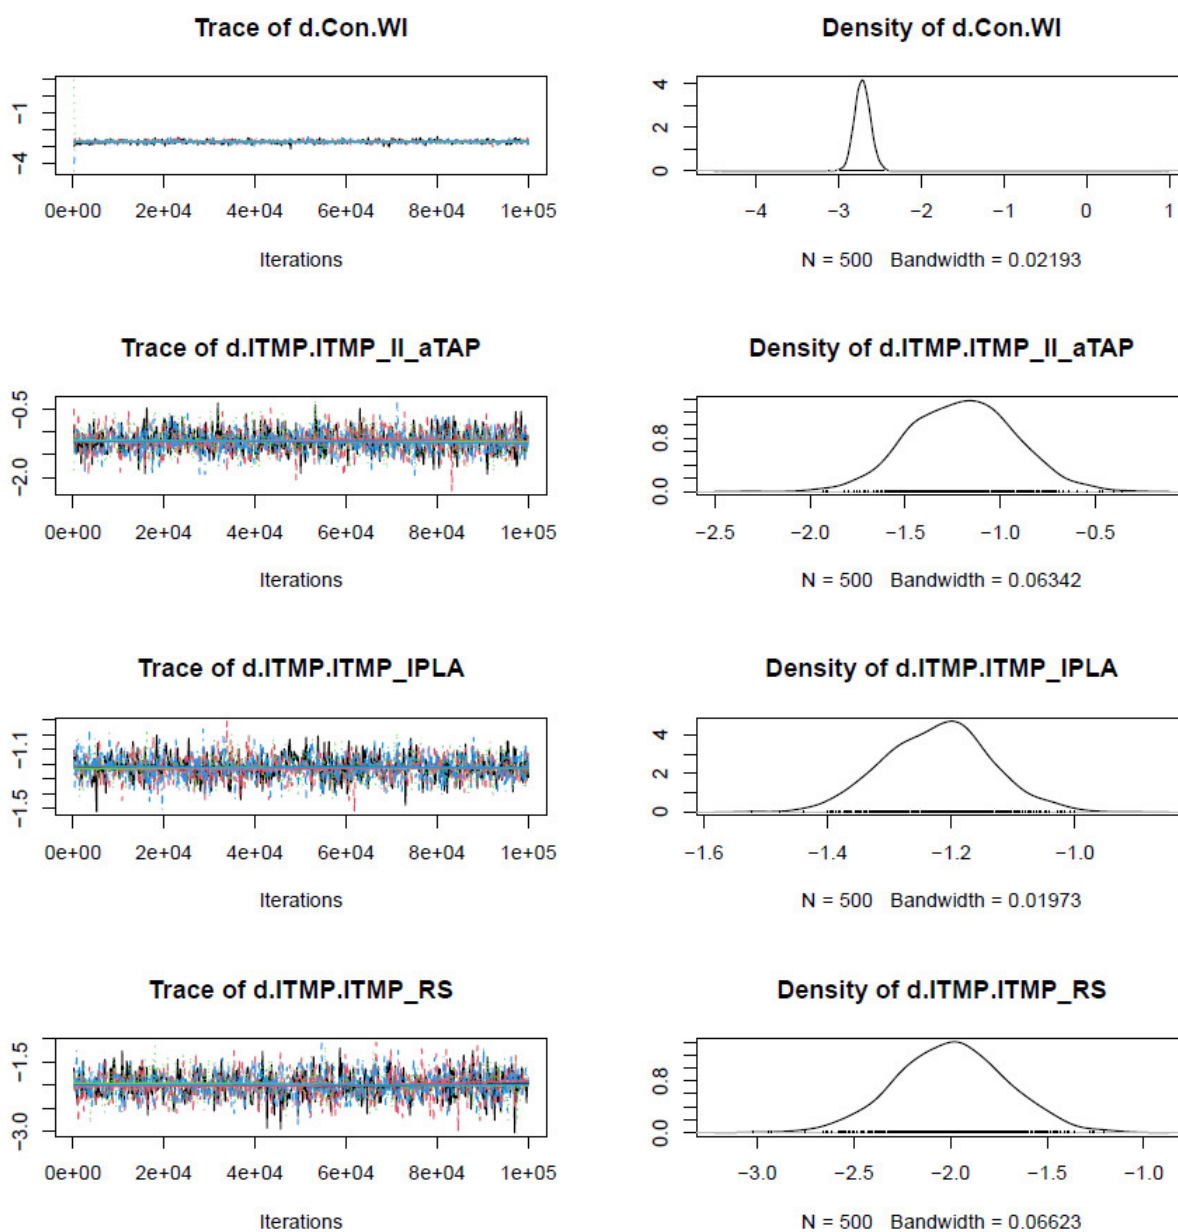

Figure S8. Cont.

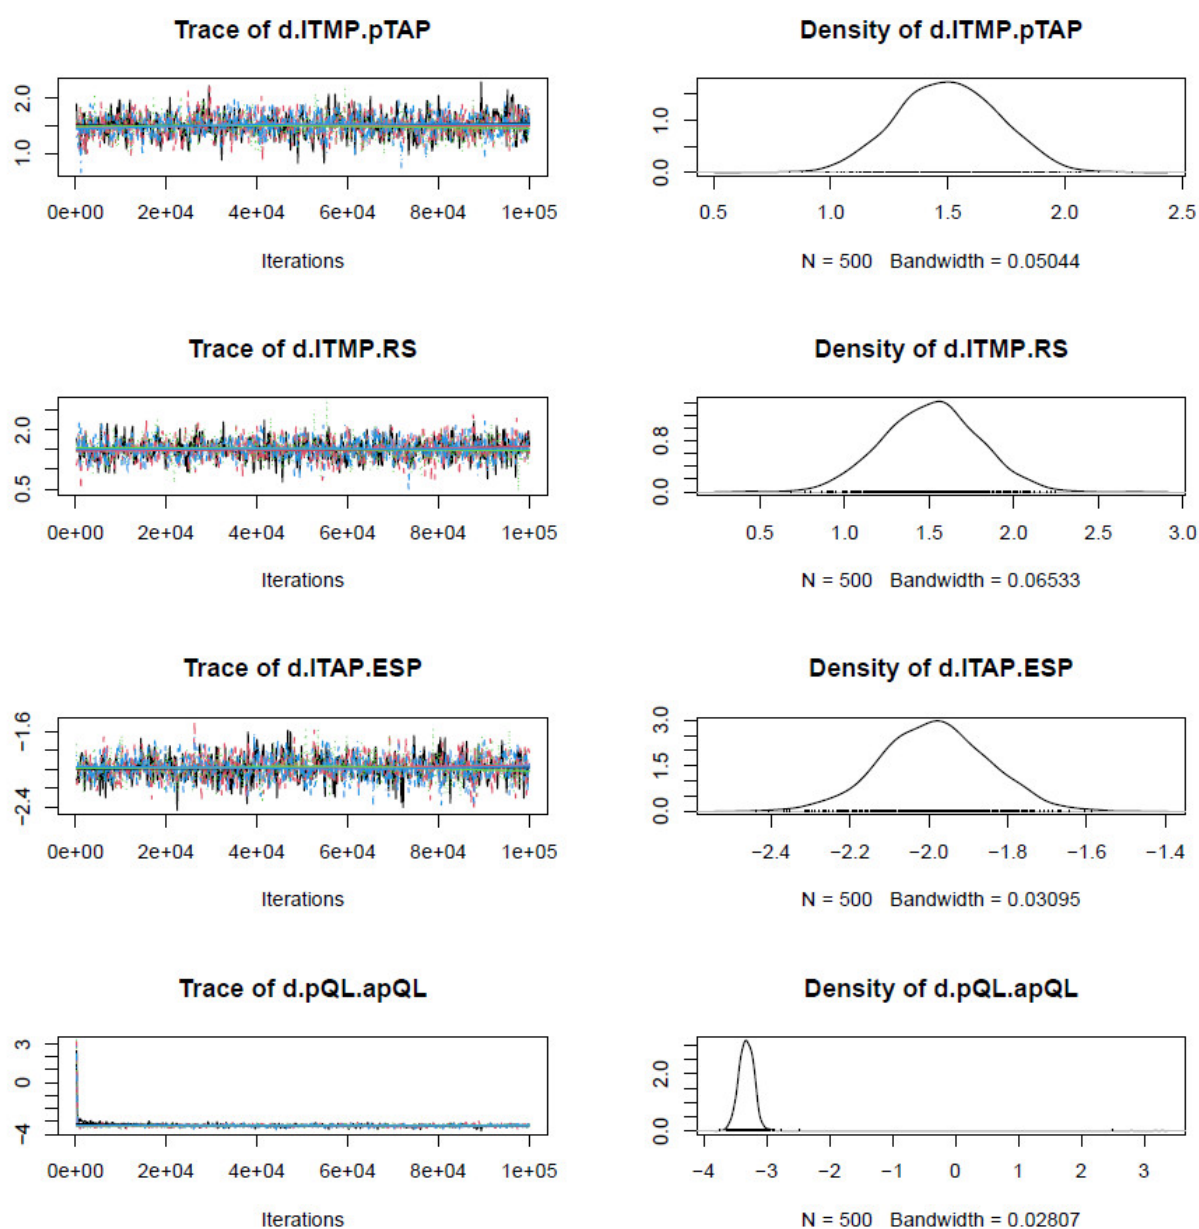

Figure S8. Cont.

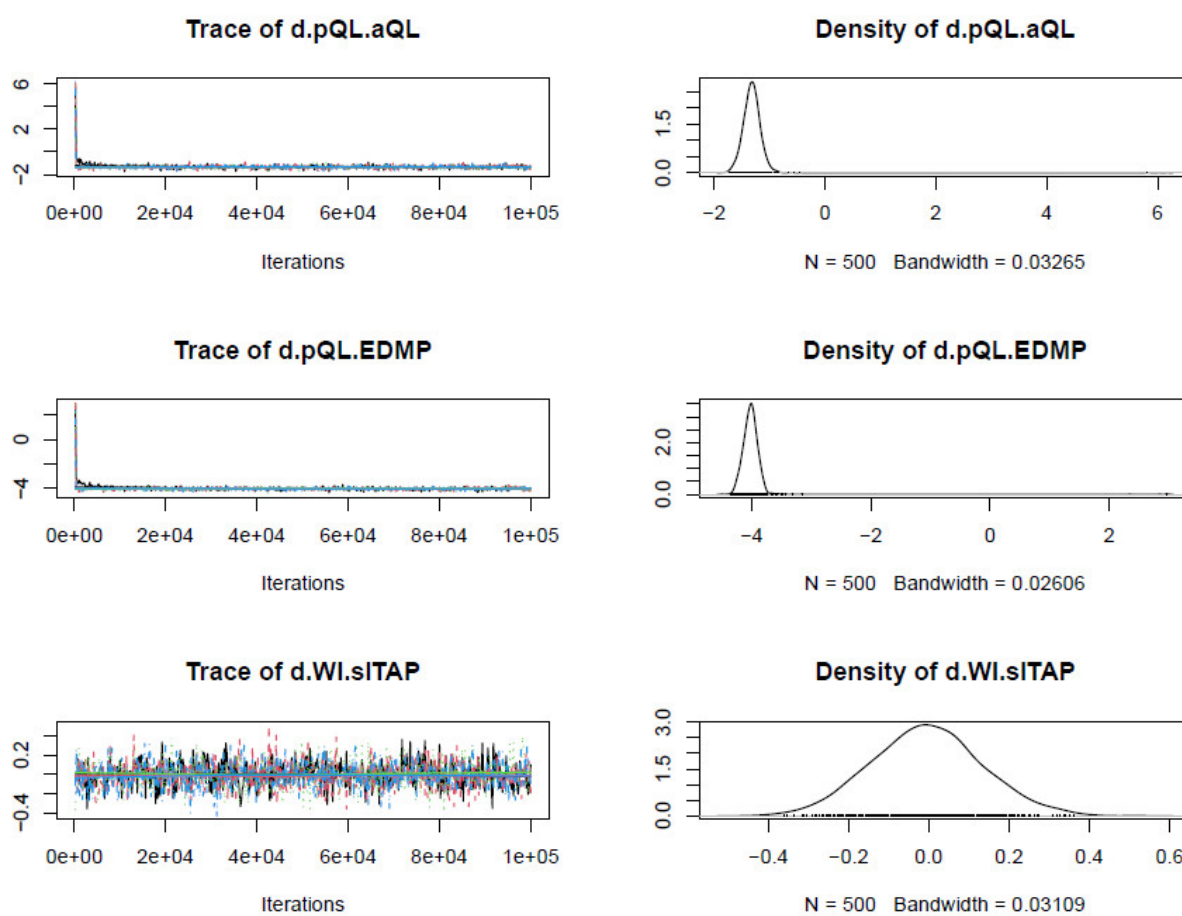

Figure S8. Cont.

(B) Trace plot and density plot in random effect model.

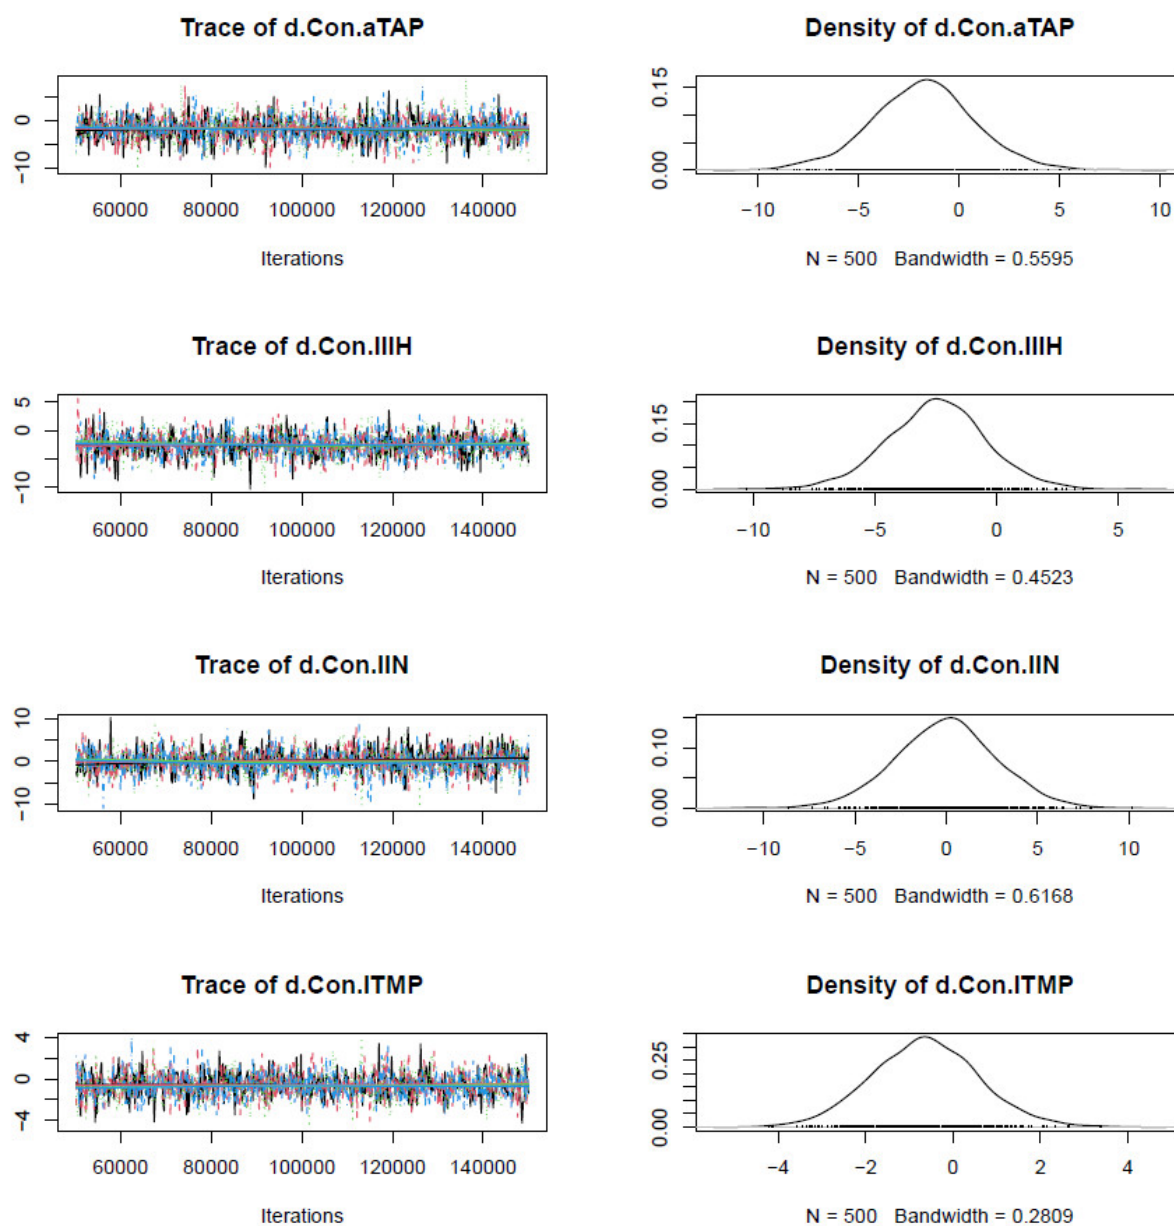

Figure S8. Cont.

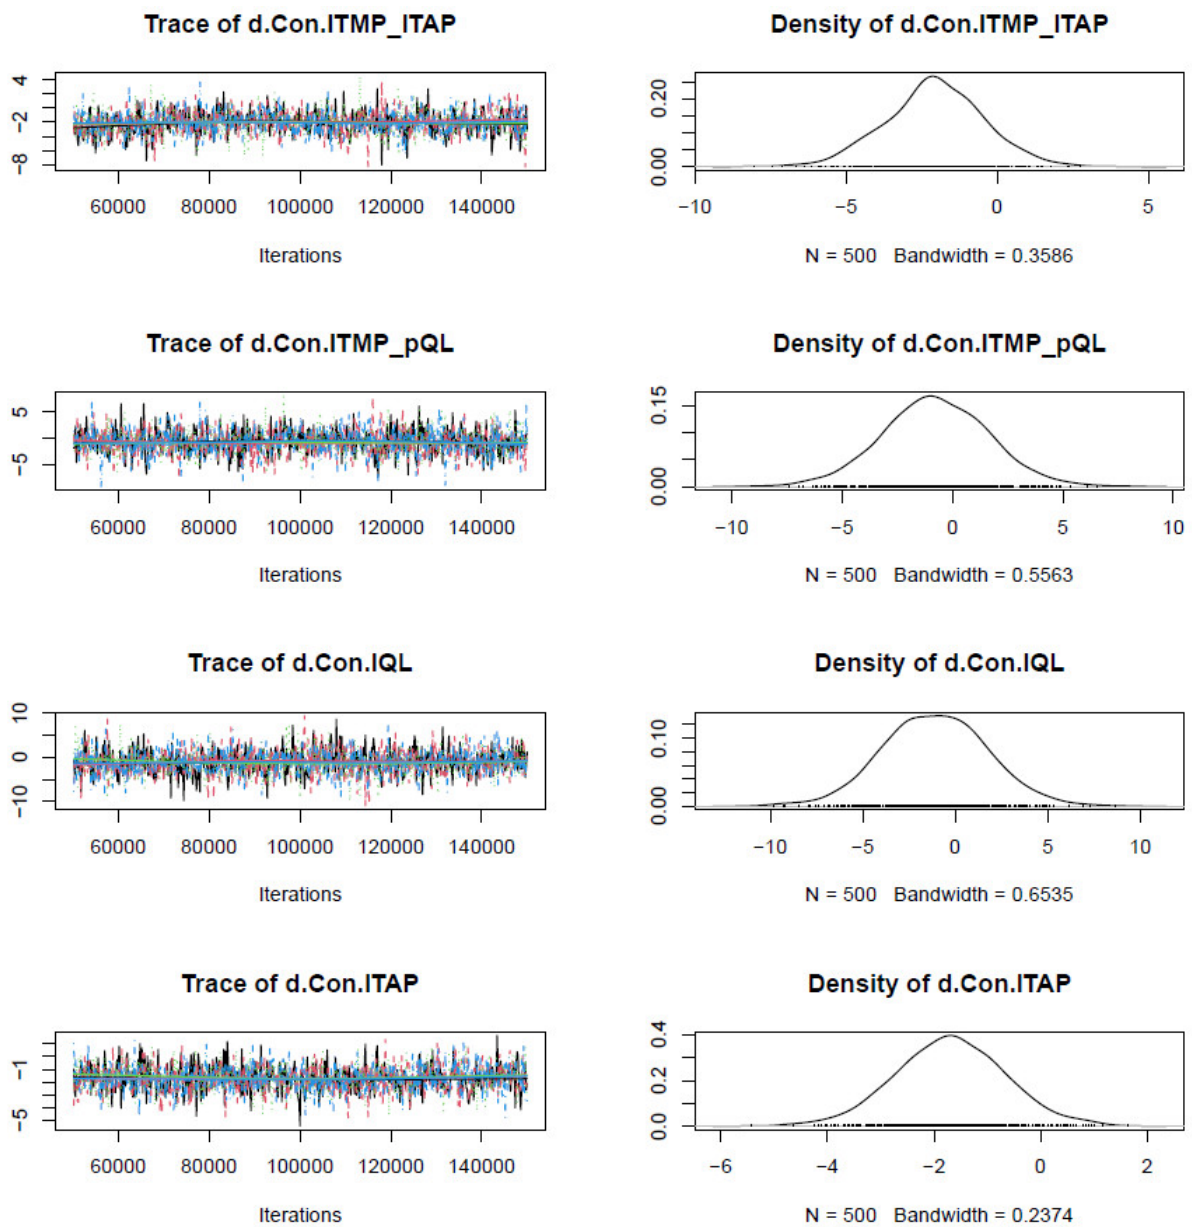

Figure S8. Cont.

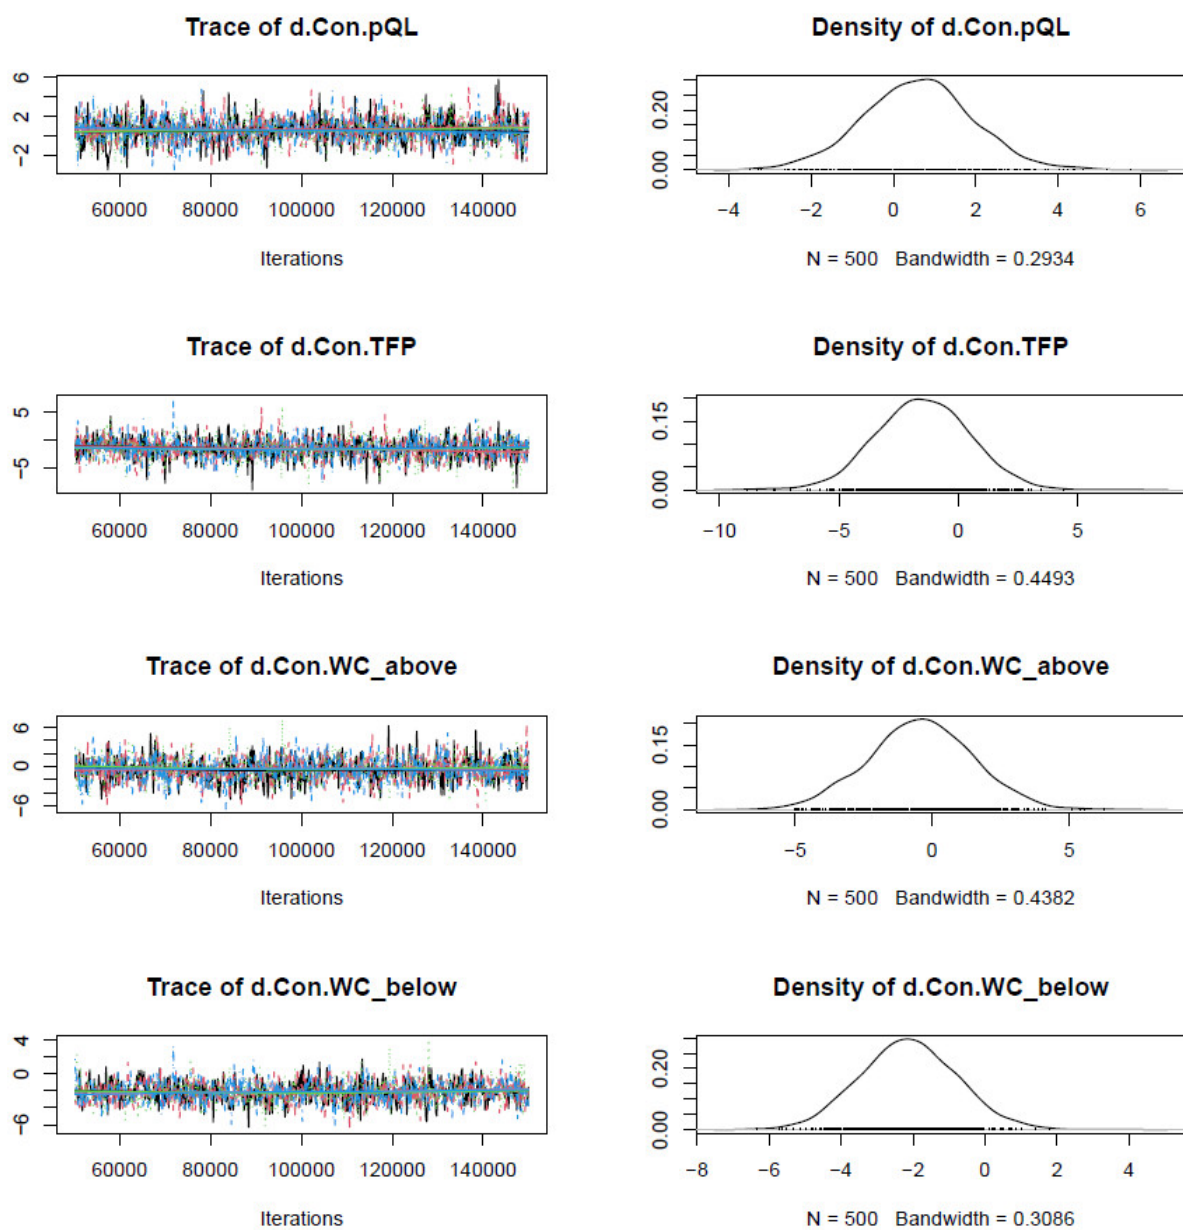

Figure S8. Cont.

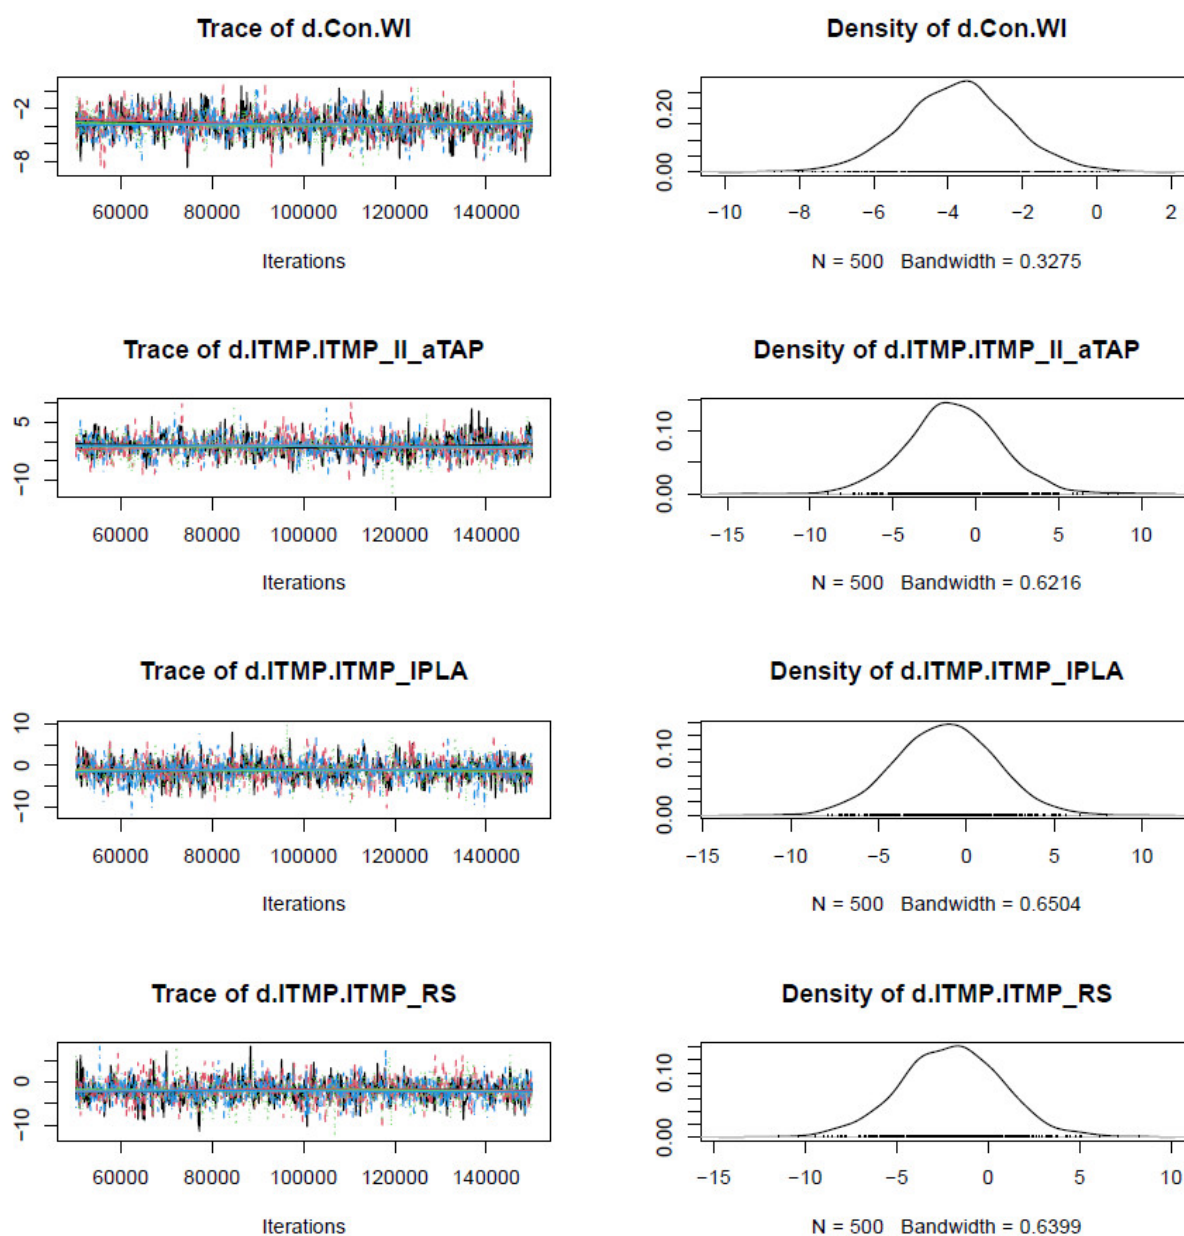

Figure S8. Cont.

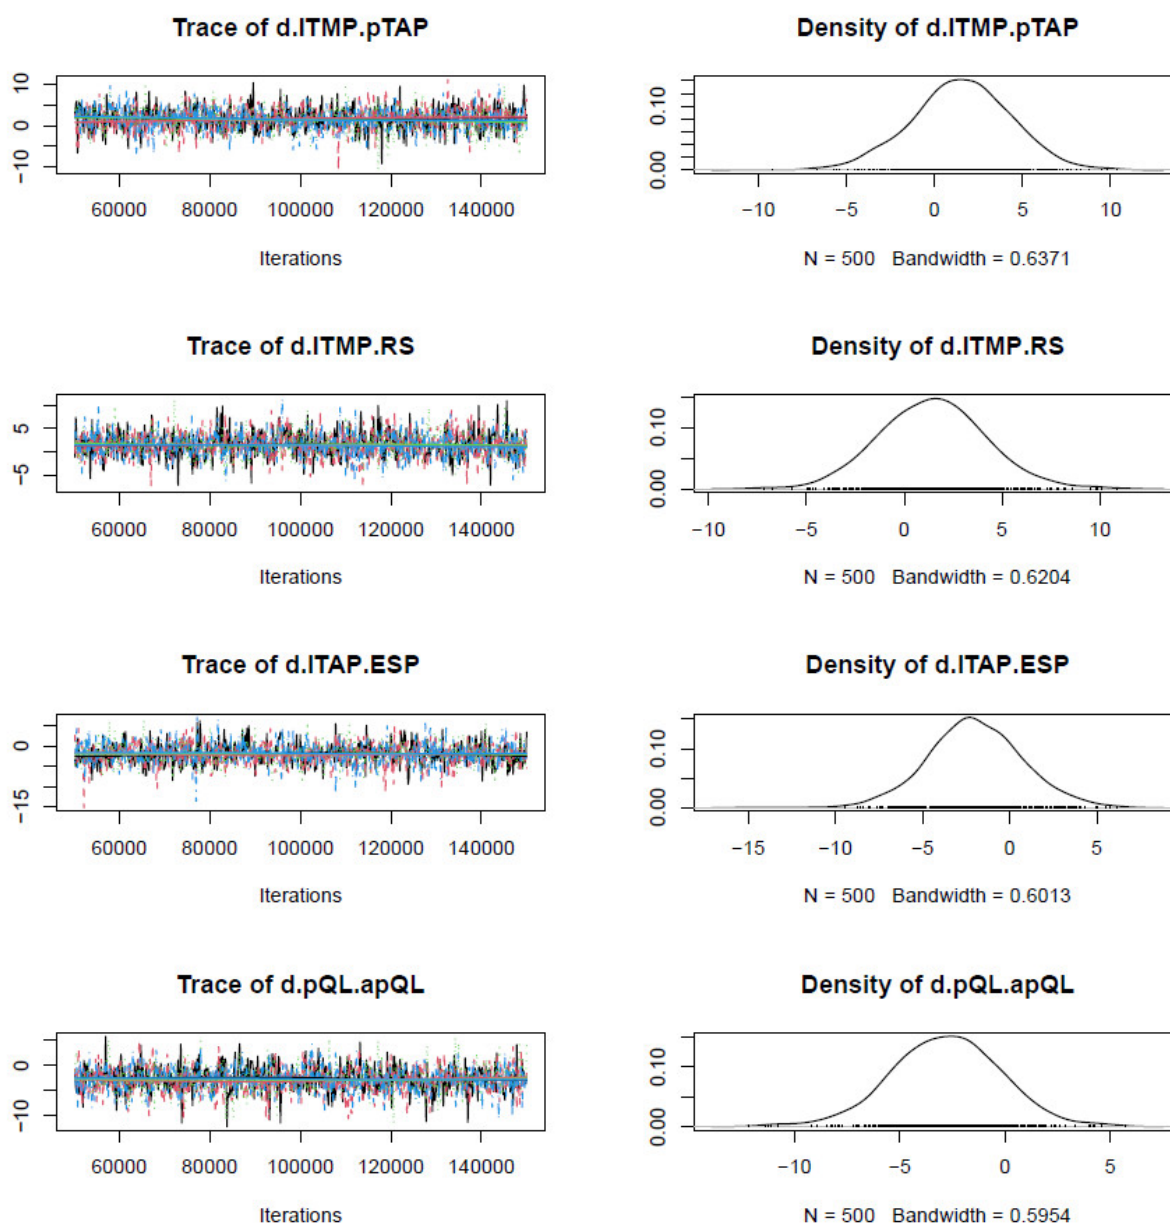

Figure S8. Cont.

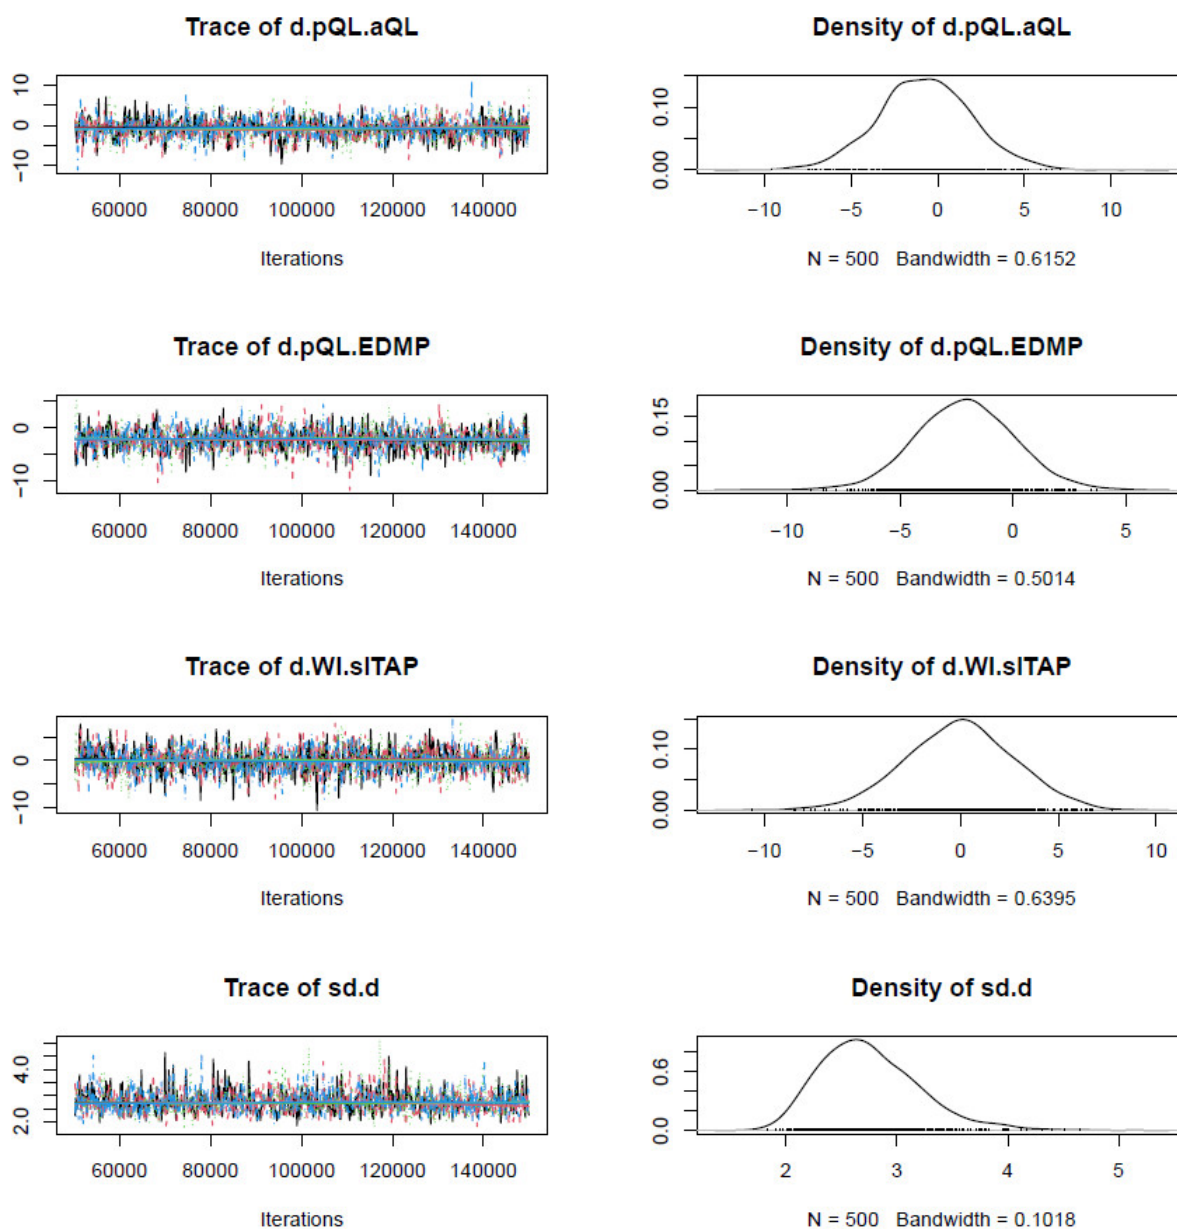

Figure S8. Cont.

(C) Gelman-Rubin-Brooks plot in fixed effect model.

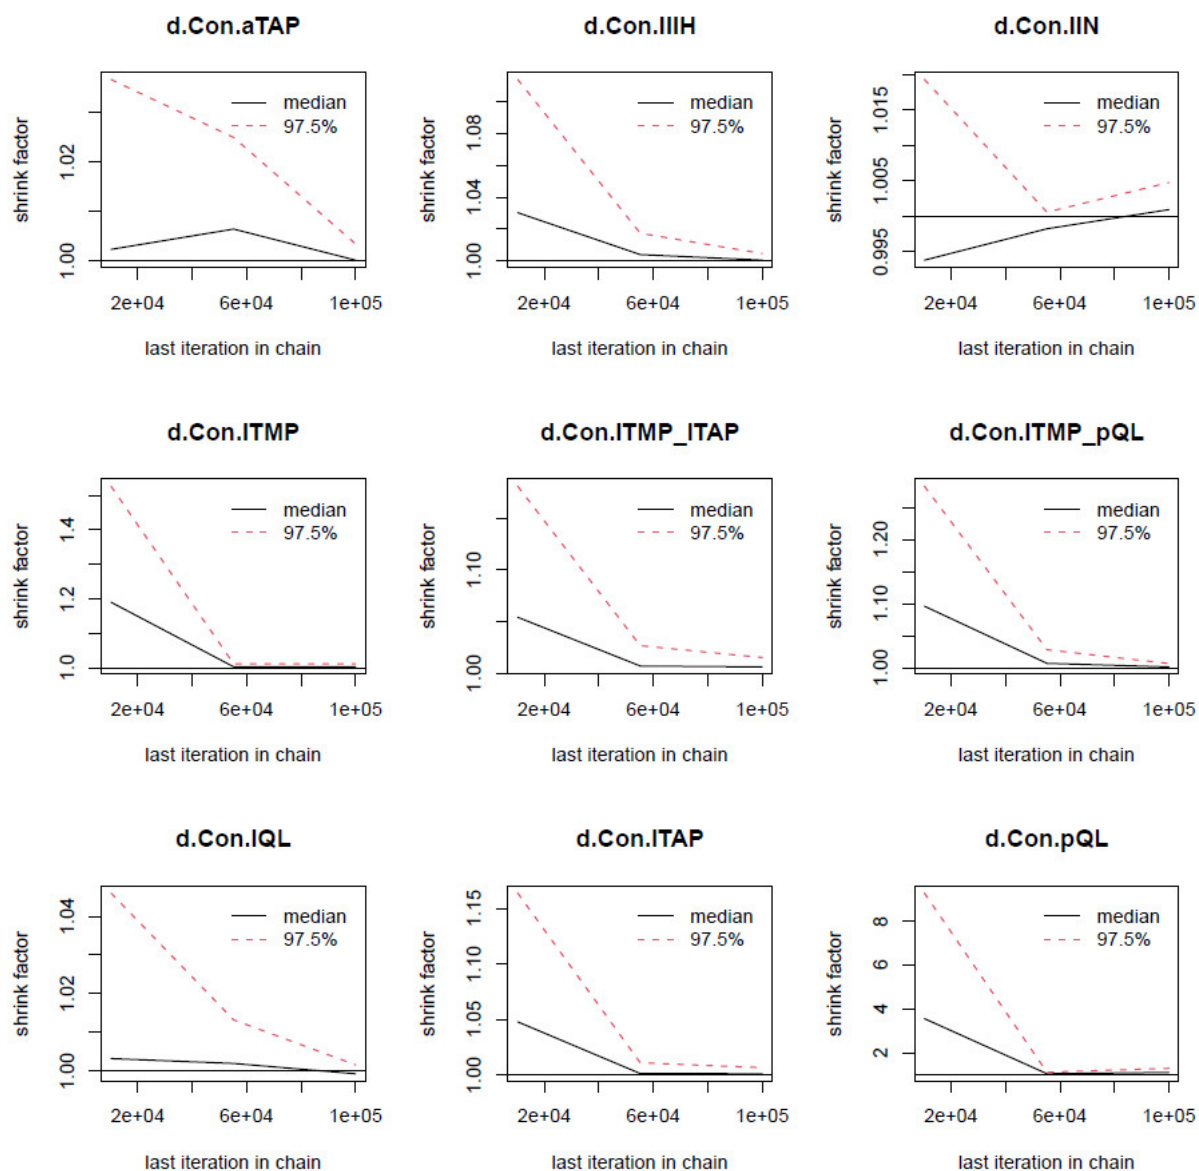

Figure S8. Cont.

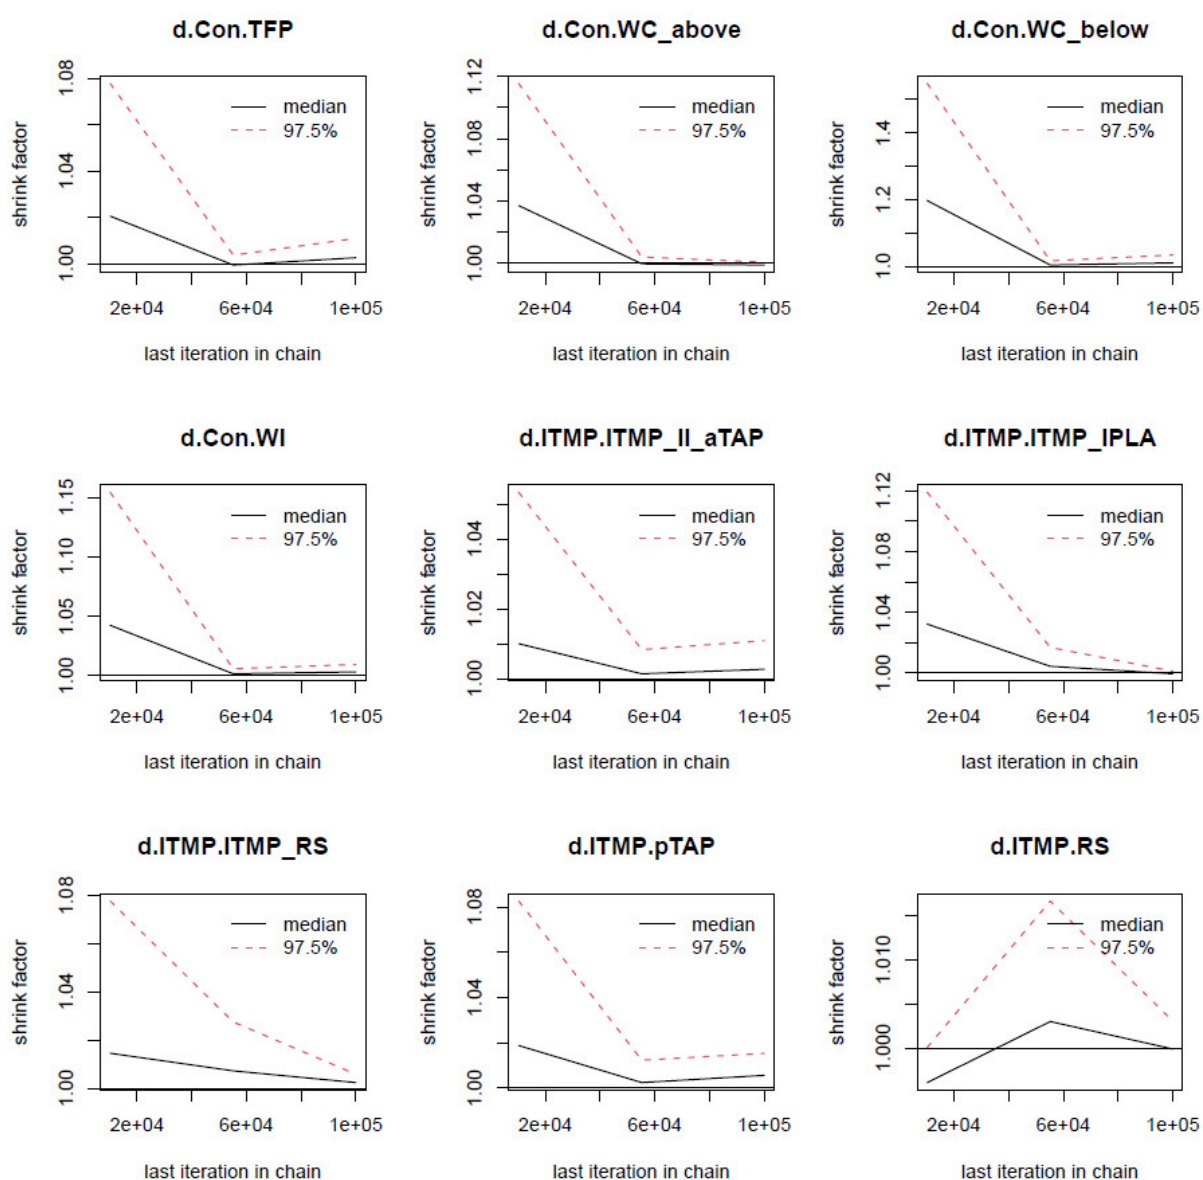

Figure S8. Cont.

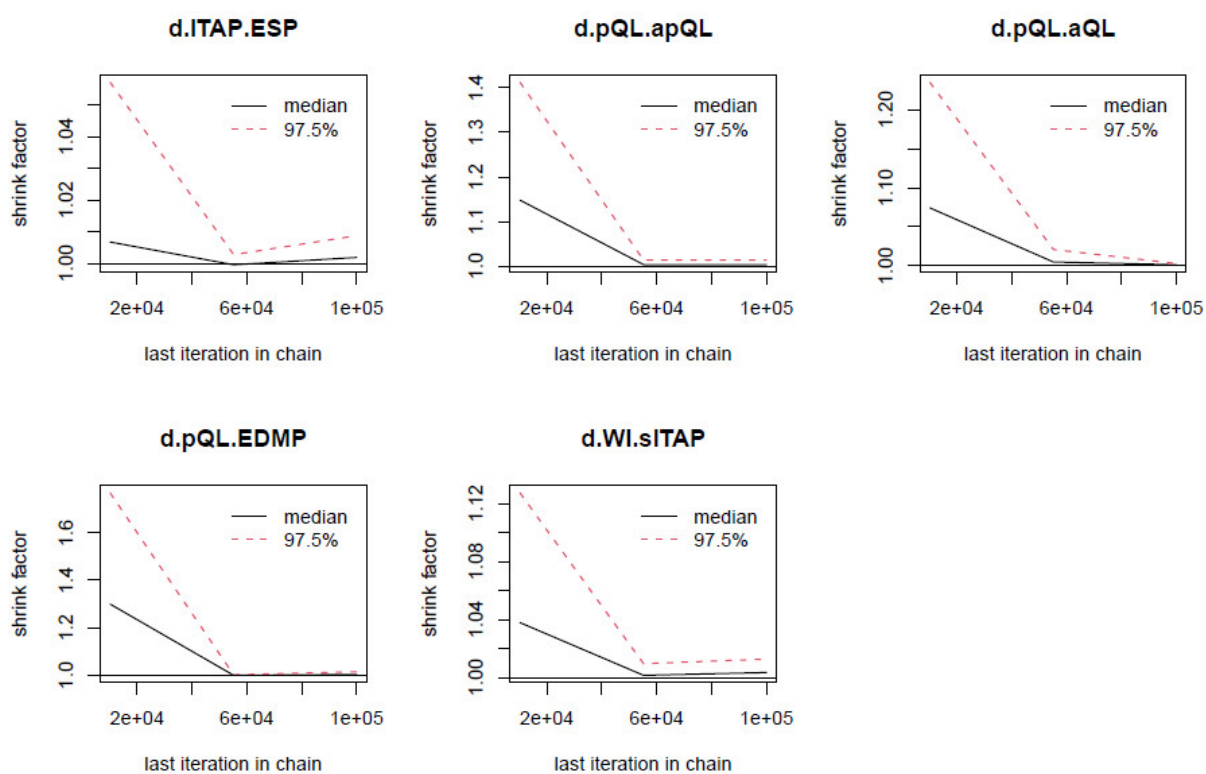

Figure S8. Cont.

(D) Gelman-Rubin-Brooks plot in random effect model.

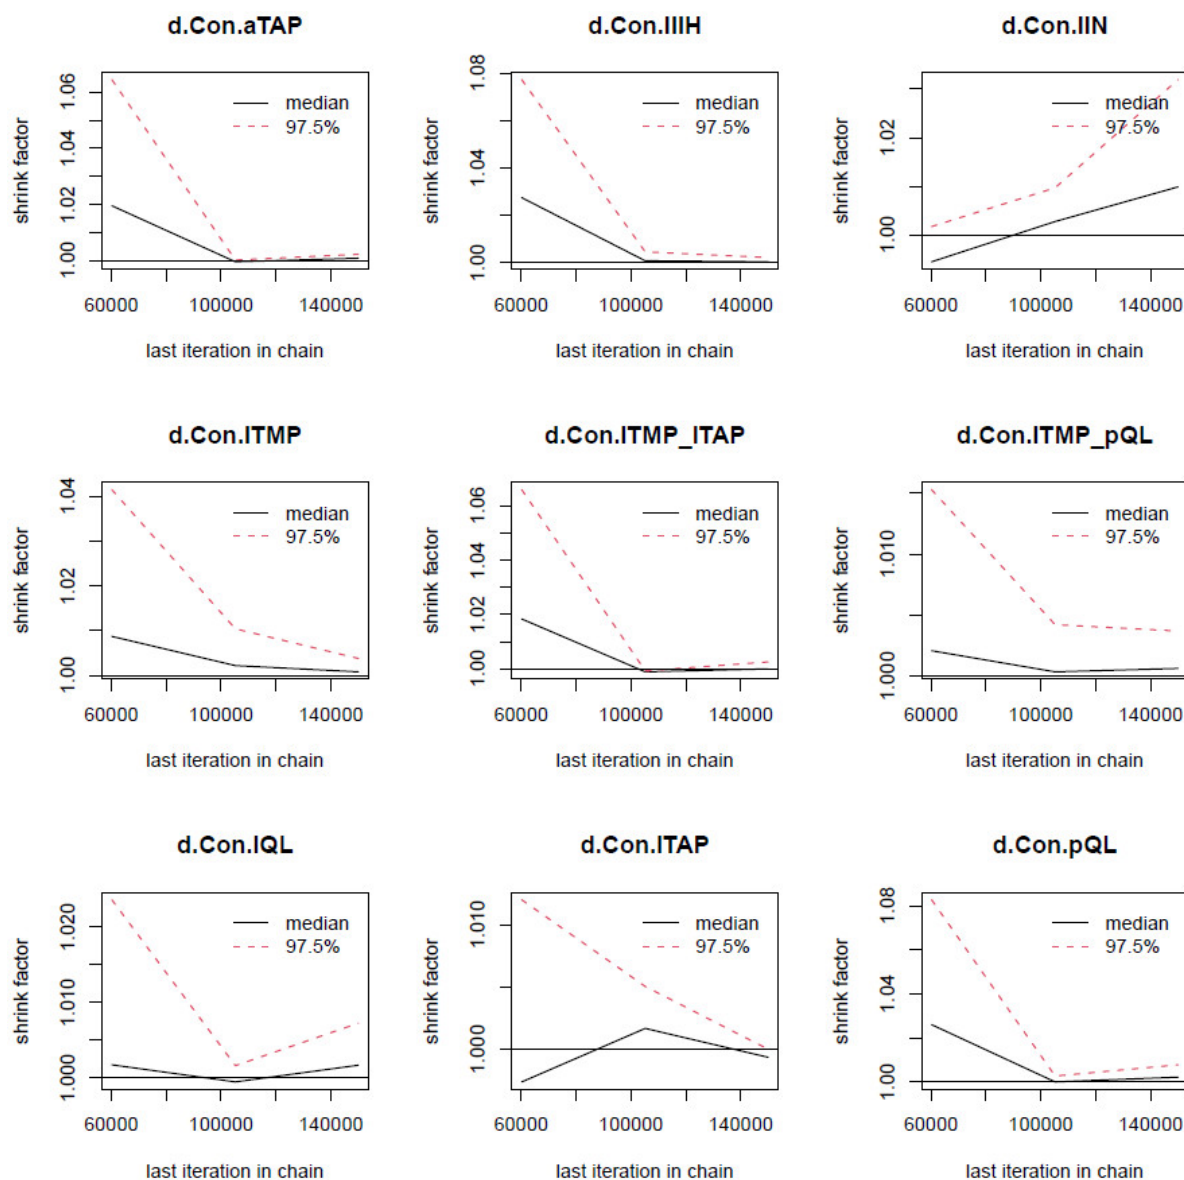

Figure S8. Cont.

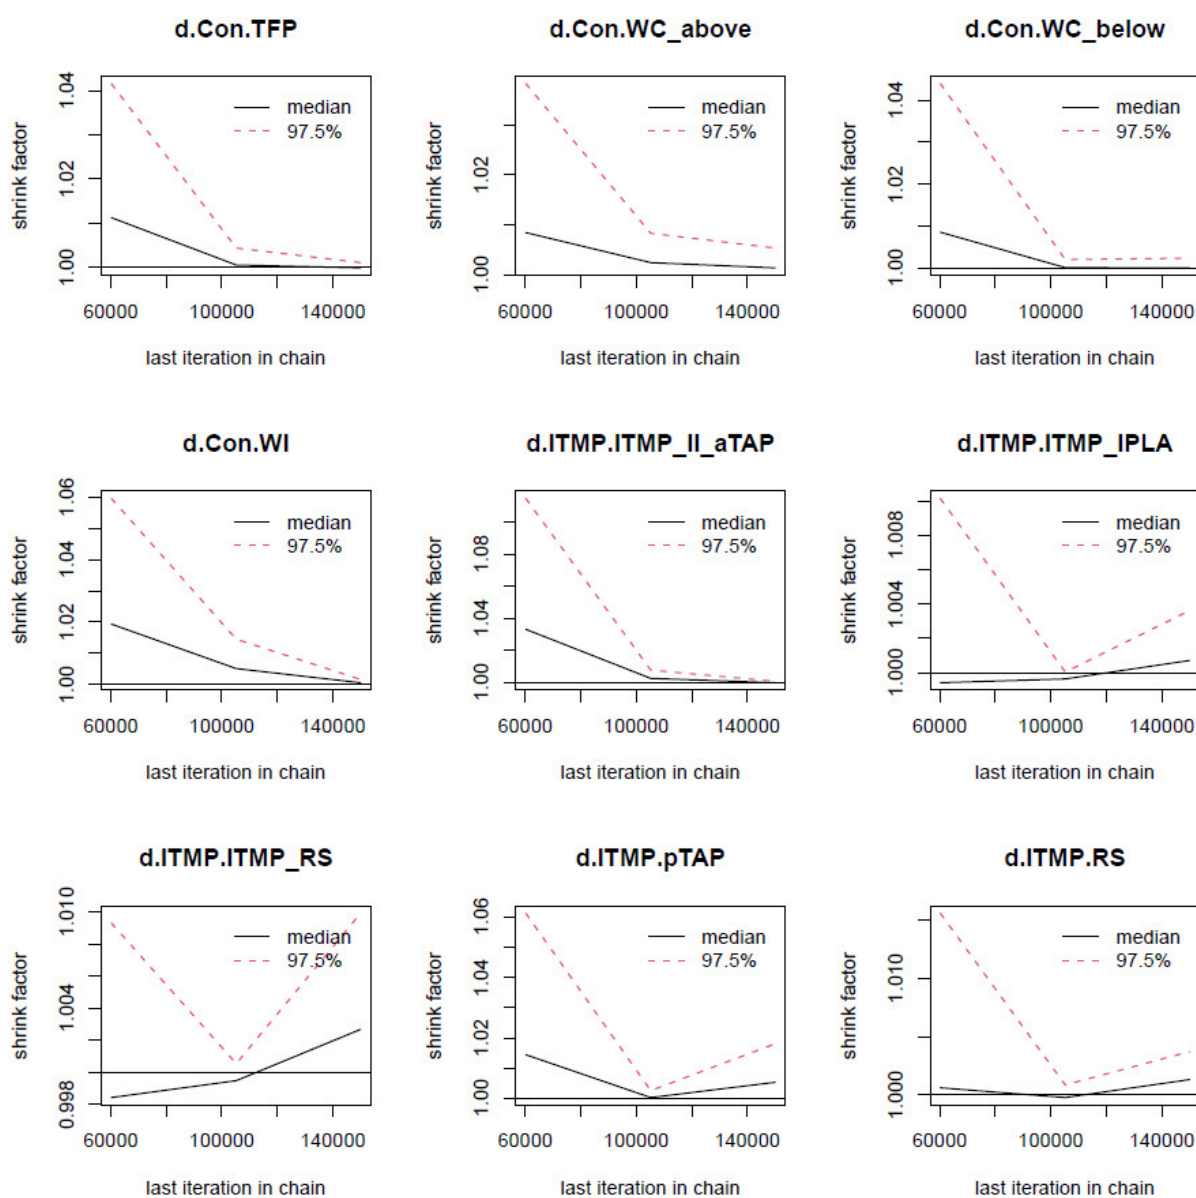

Figure S8. Cont.

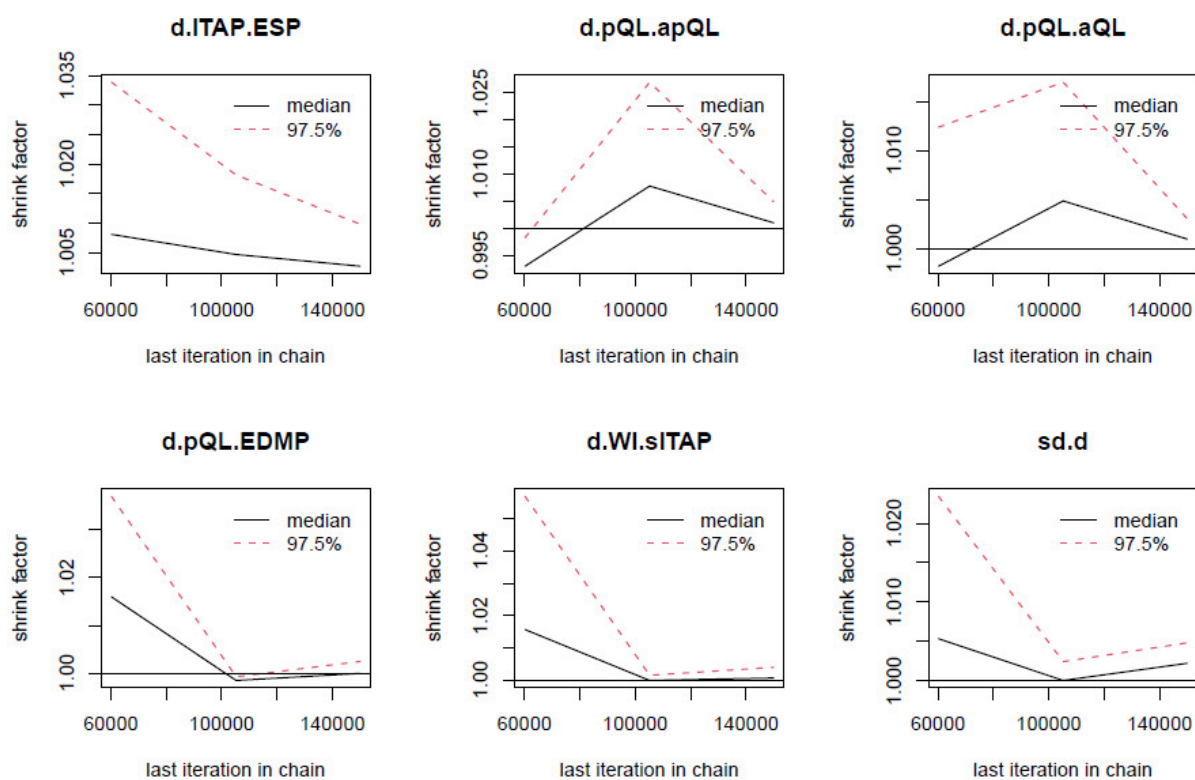

Figure S8. Cont.

(E) Forest plot comparing with control in random effect model.

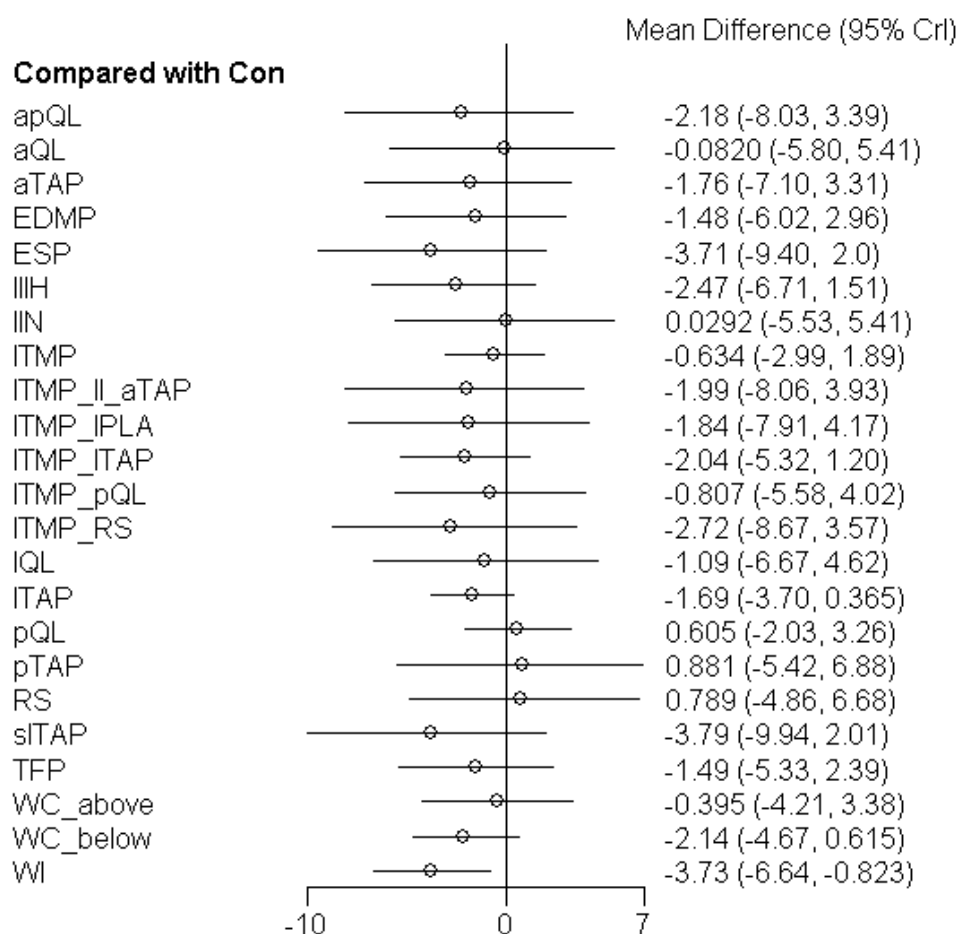**Figure S8.** Cont.

(F) Node splitting plot in random effect model.

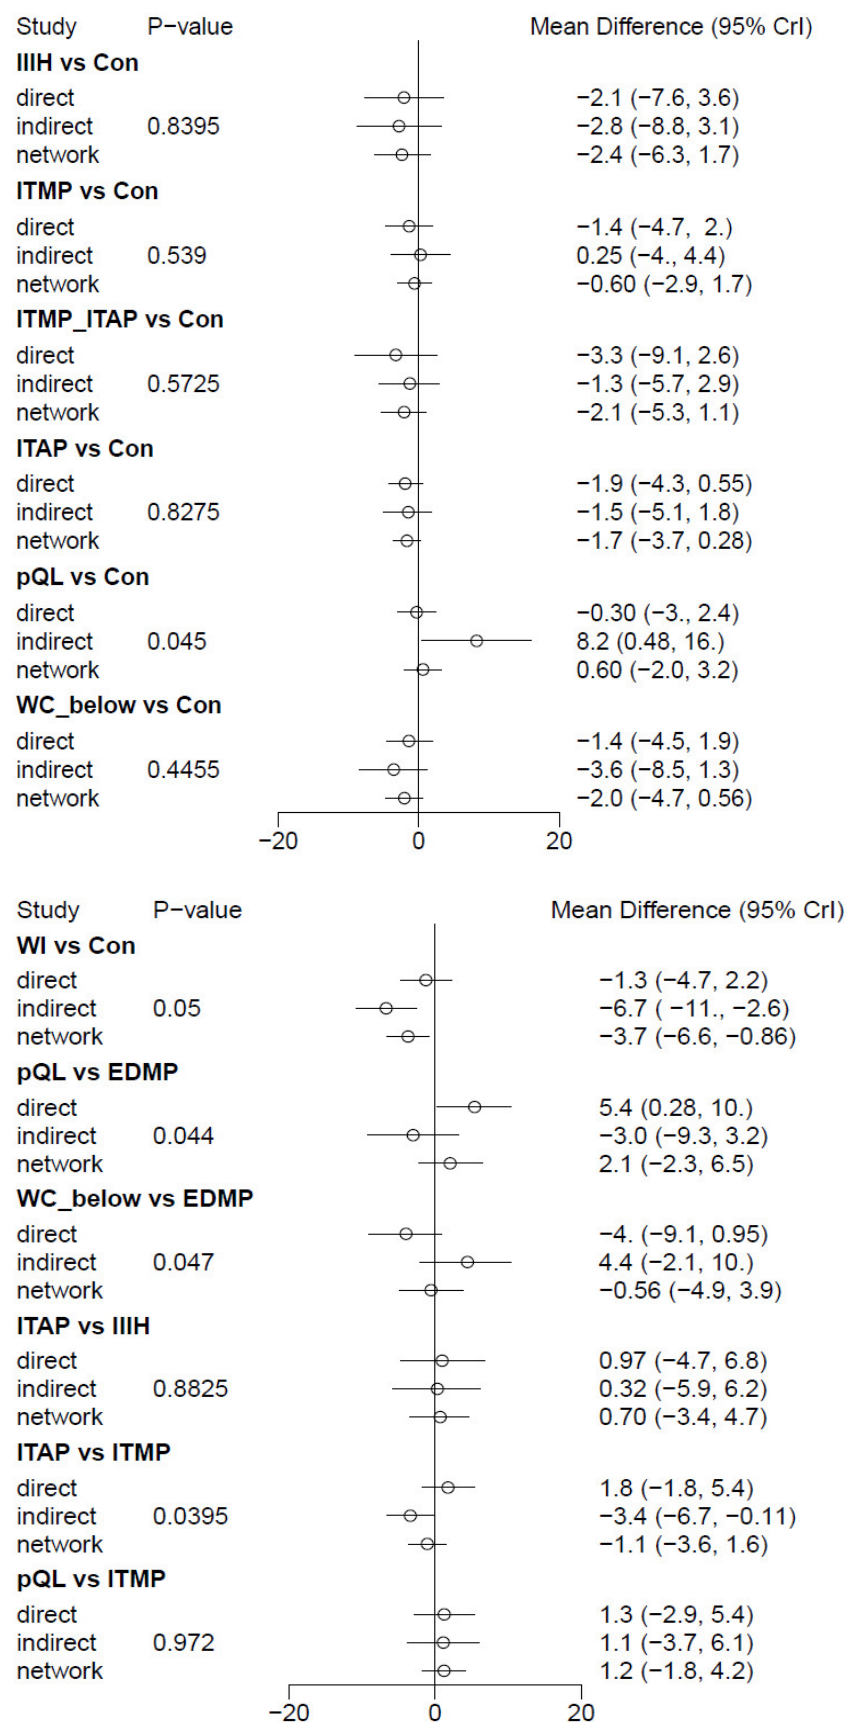

Figure S8. Cont.

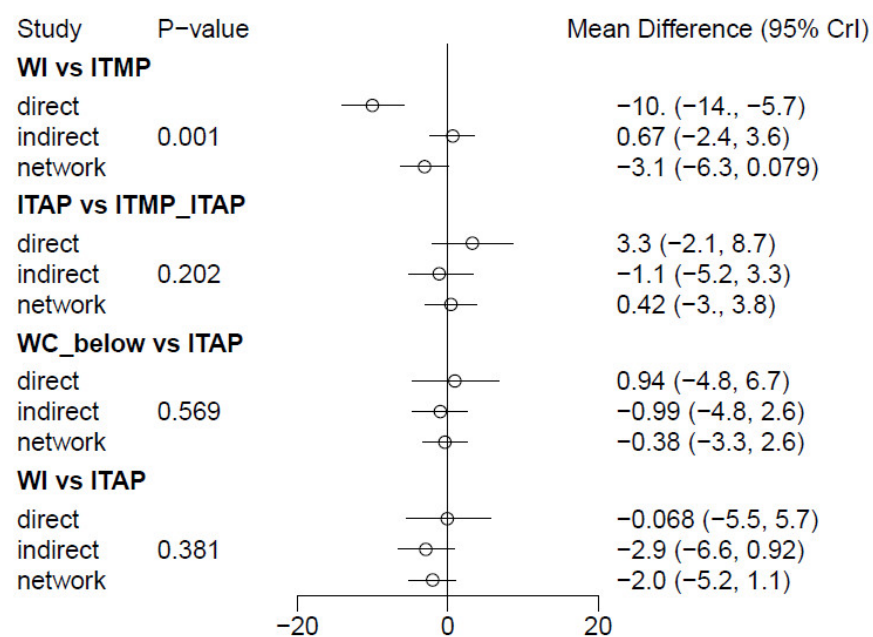

Figure S8. Cont.

(G) Rankogram in random effect model.

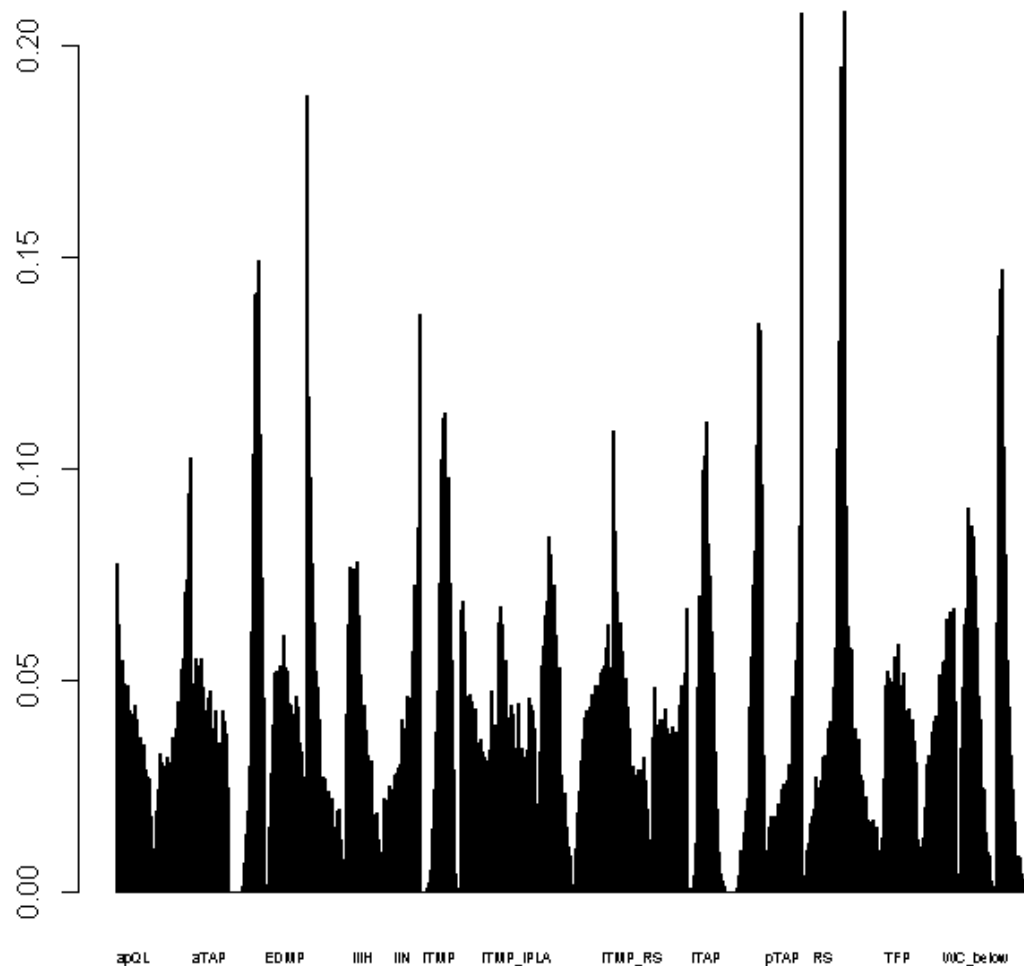

**Figure S8.** Dynamic pain at 6 h after surgery. (A) Trace plot and density plot in fixed effect model; (B) Trace plot and density plot in random effect model; (C) Gelman-Rubin-Brooks plot in fixed effect model; (D) Gelman-Rubin-Brooks plot in random effect model; (E) Forest plot comparing with control in random effect model; (F) Node splitting plot in random effect model; (G) Rankogram in random effect model.

(A) Trace plot and density plot in fixed effect model.

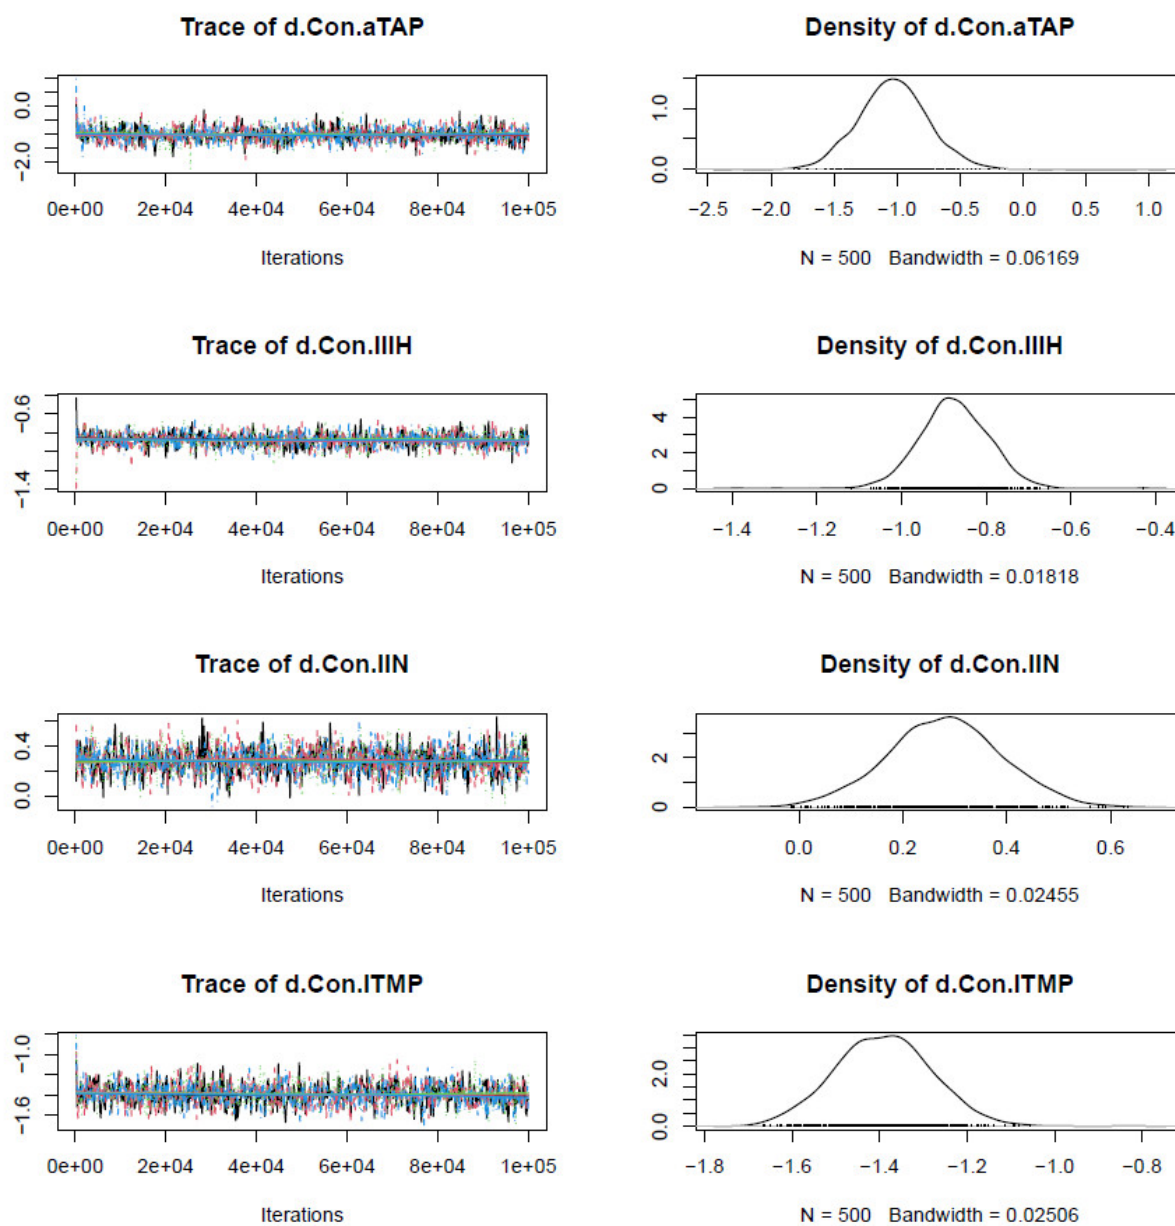

Figure S9. Cont.

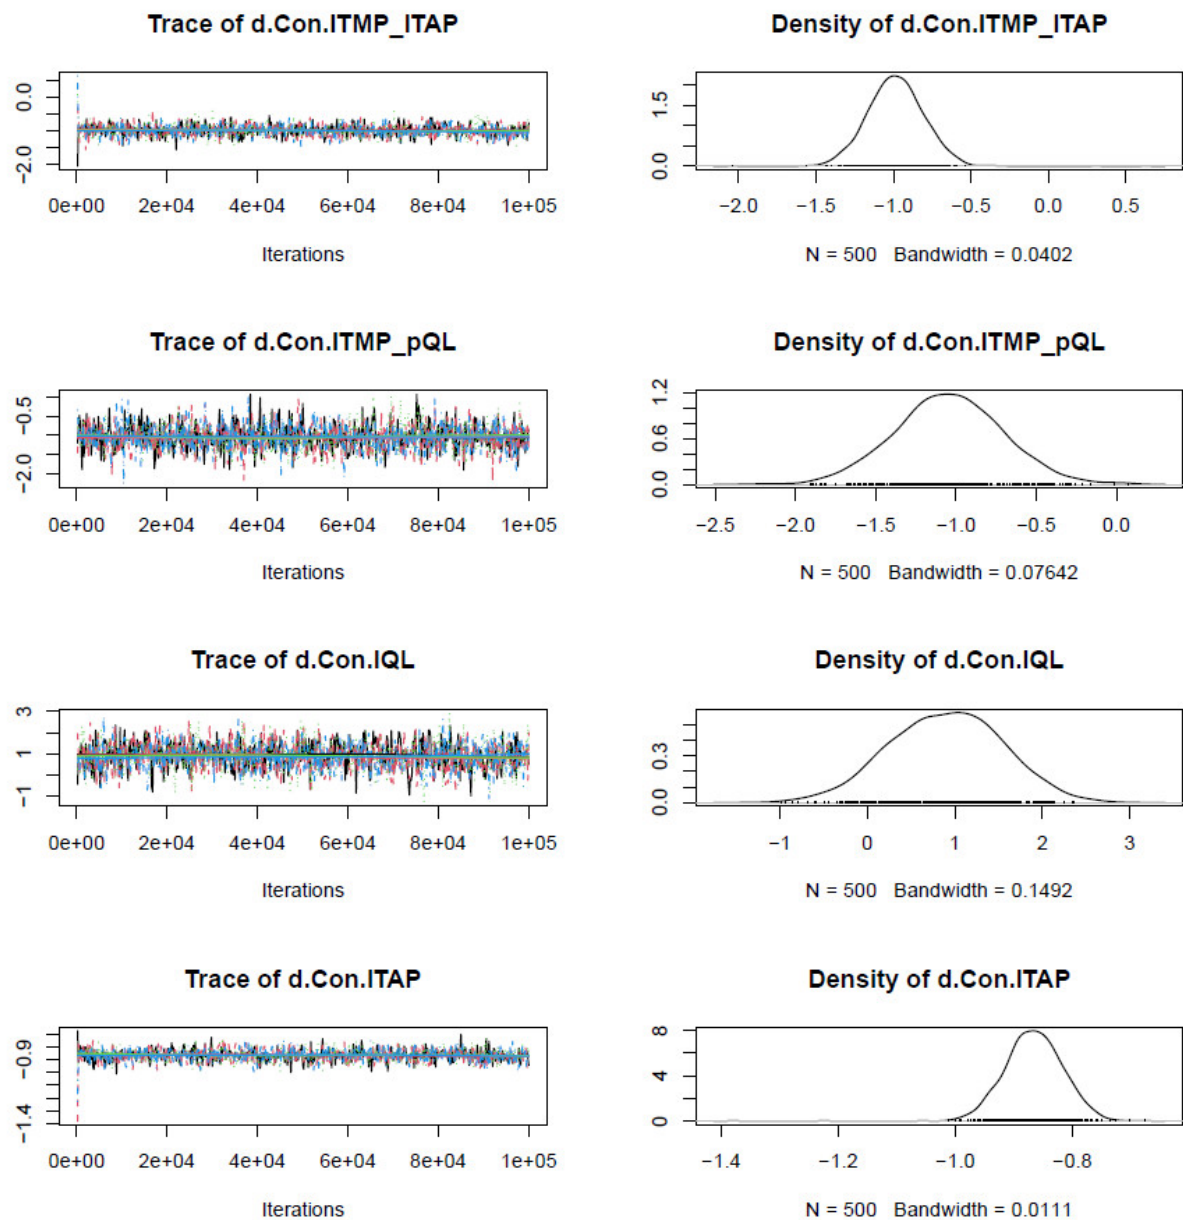

Figure S9. Cont.

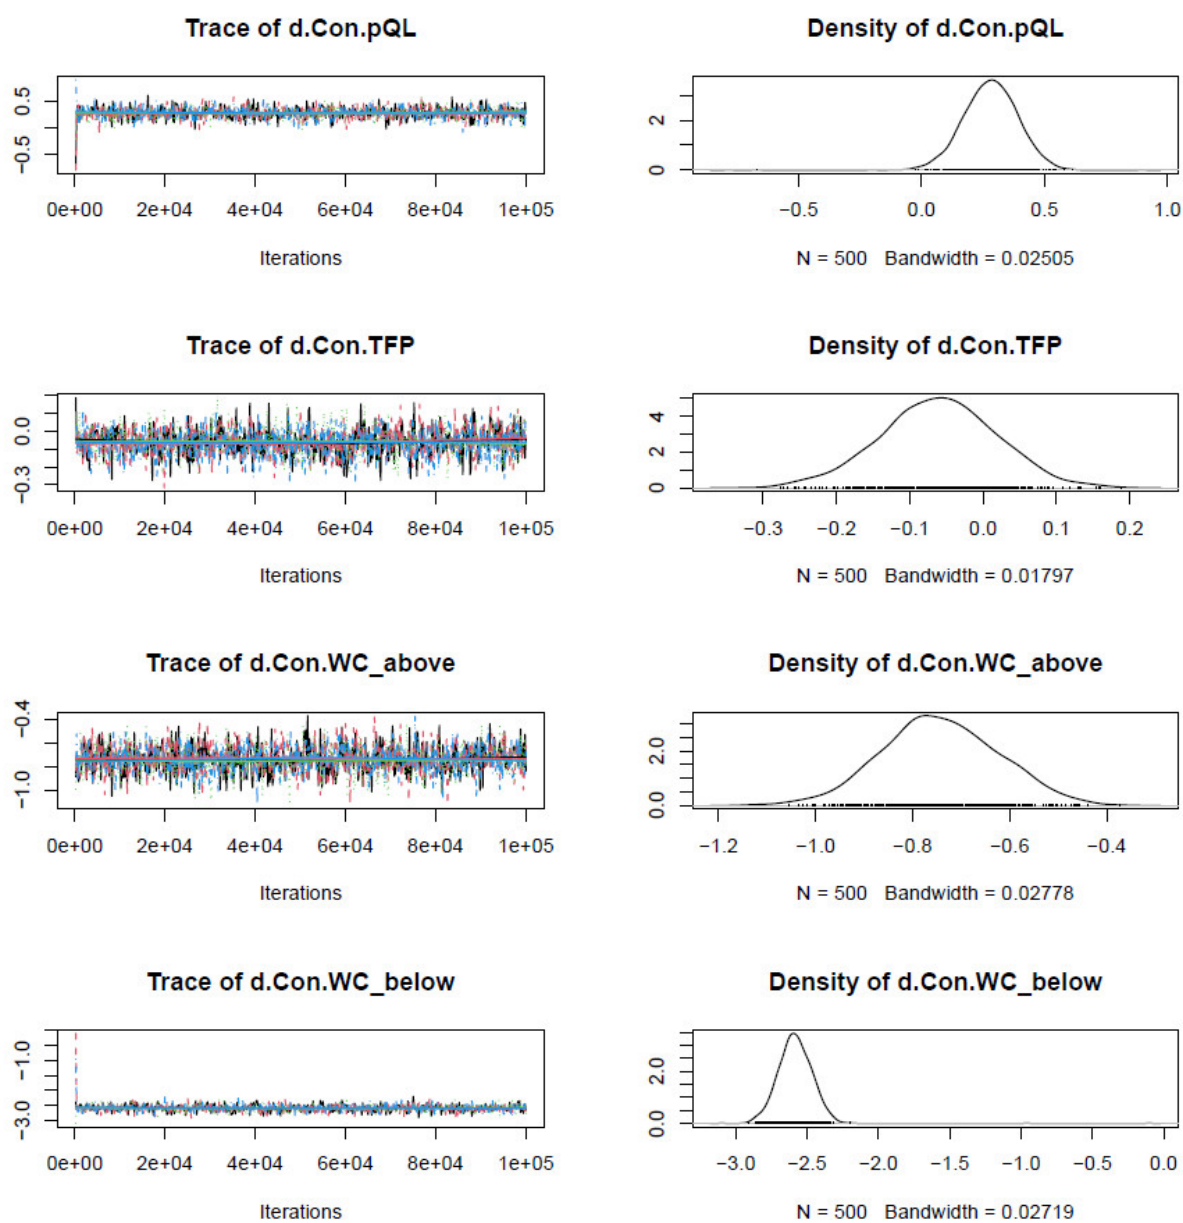

Figure S9. Cont.

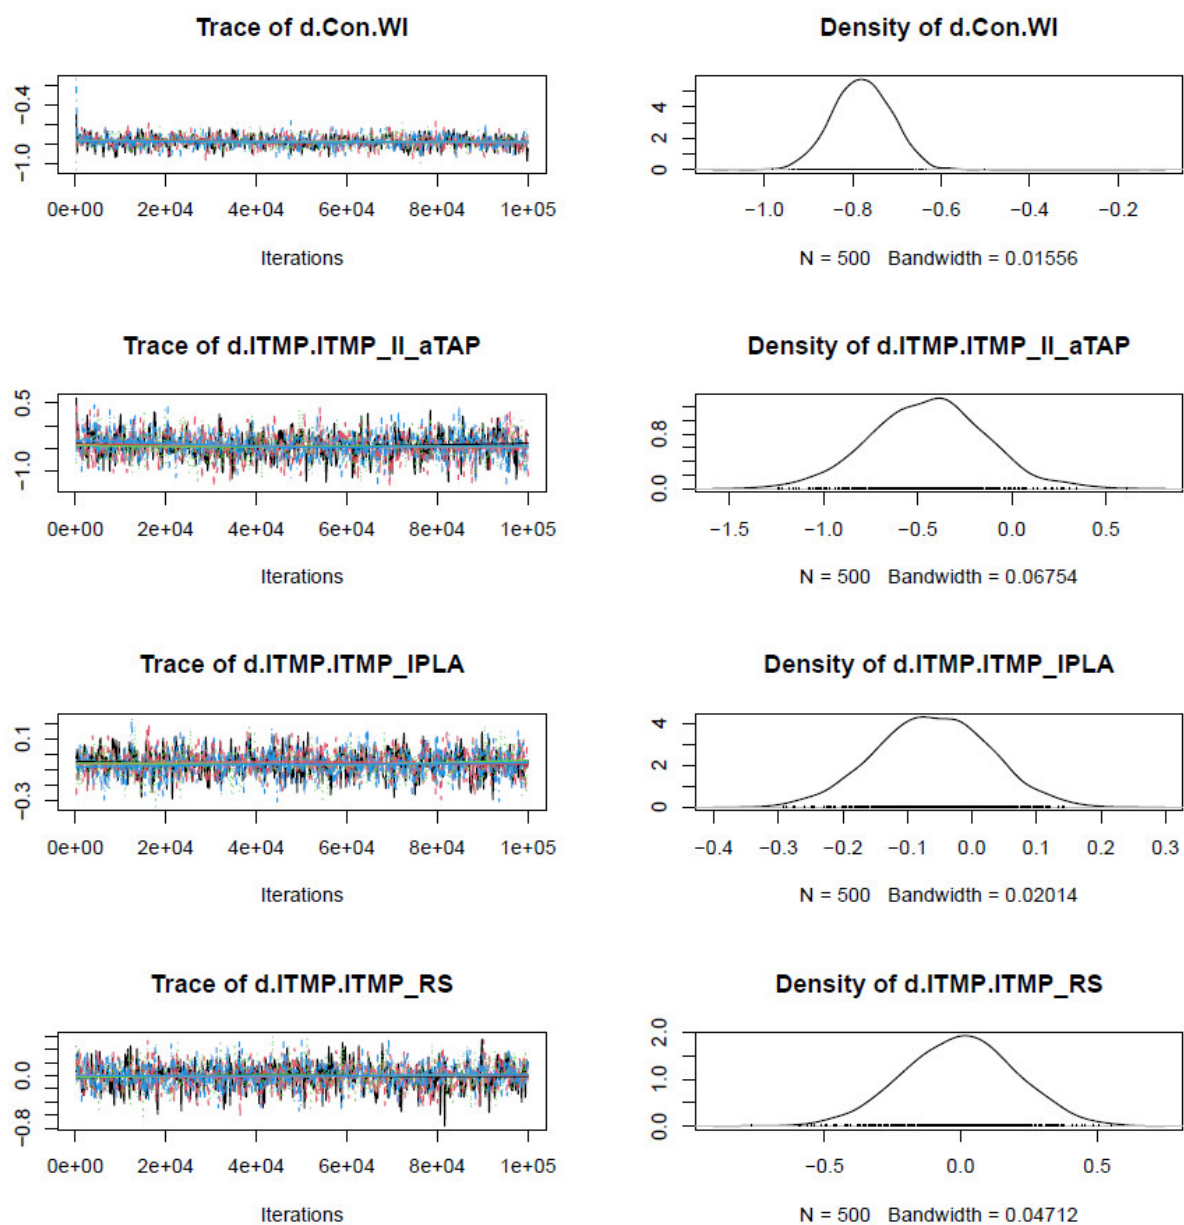

Figure S9. Cont.

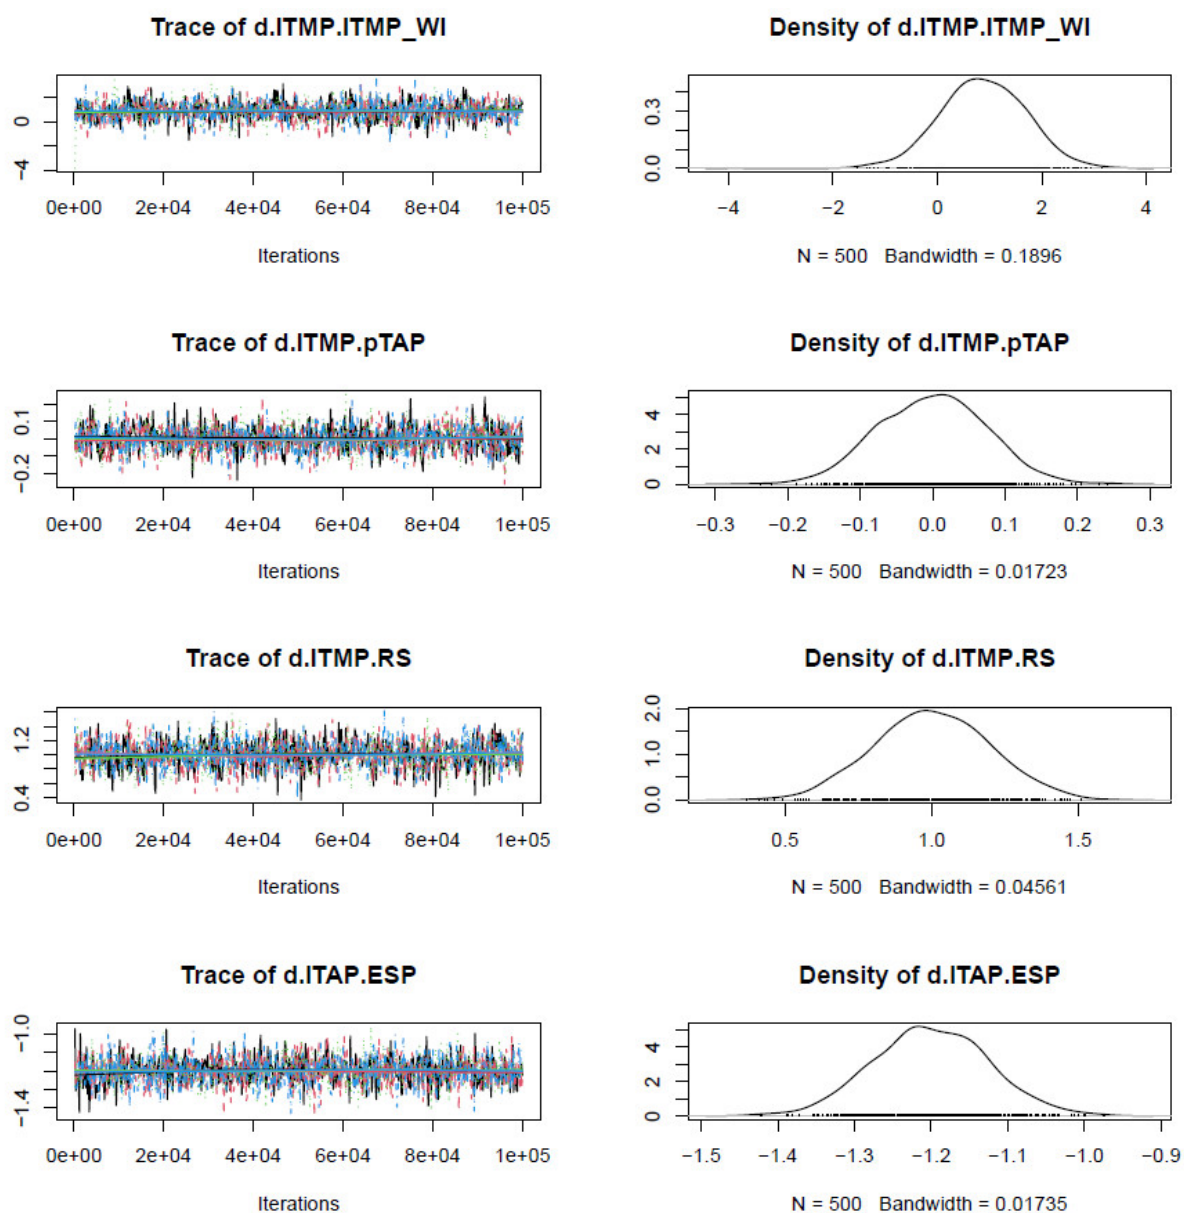

Figure S9. Cont.

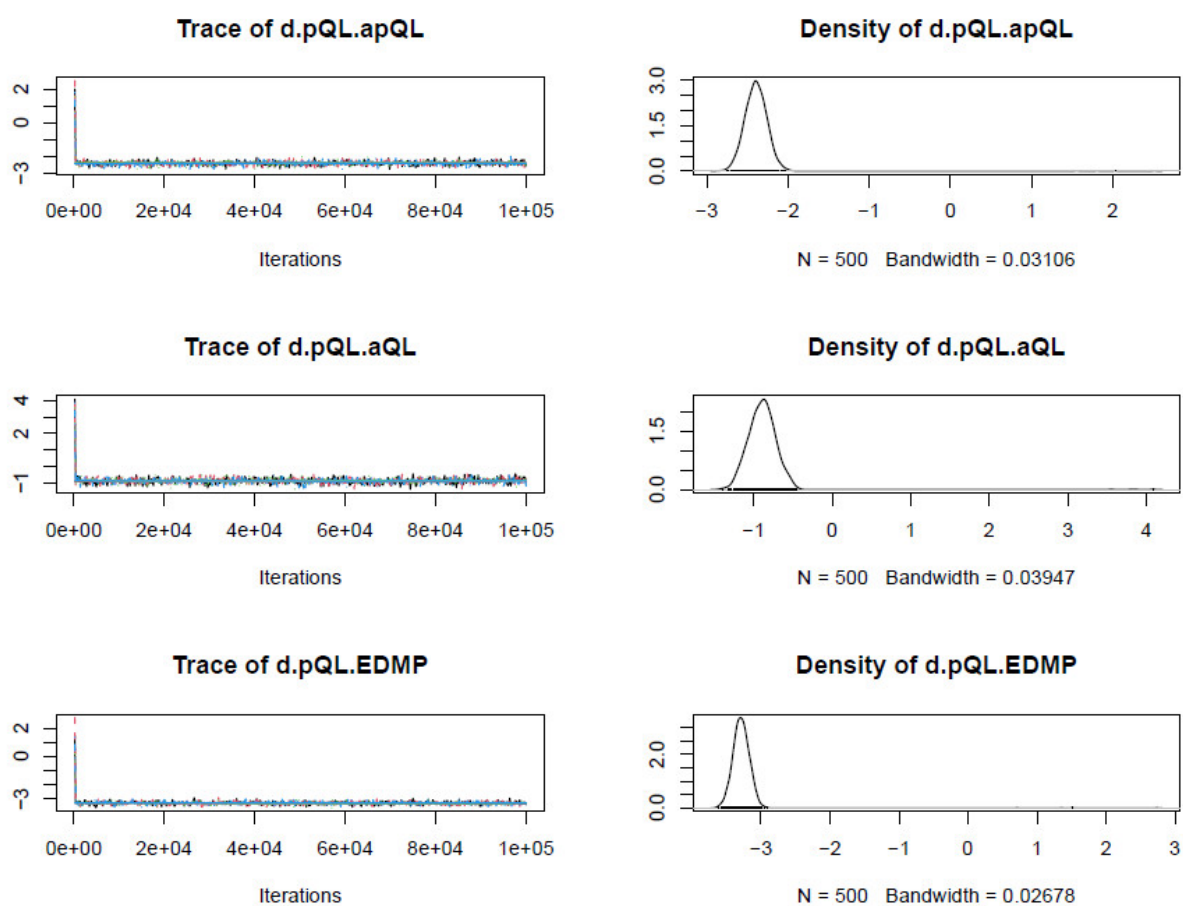

Figure S9. Cont.

(B) Trace plot and density plot in random effect model.

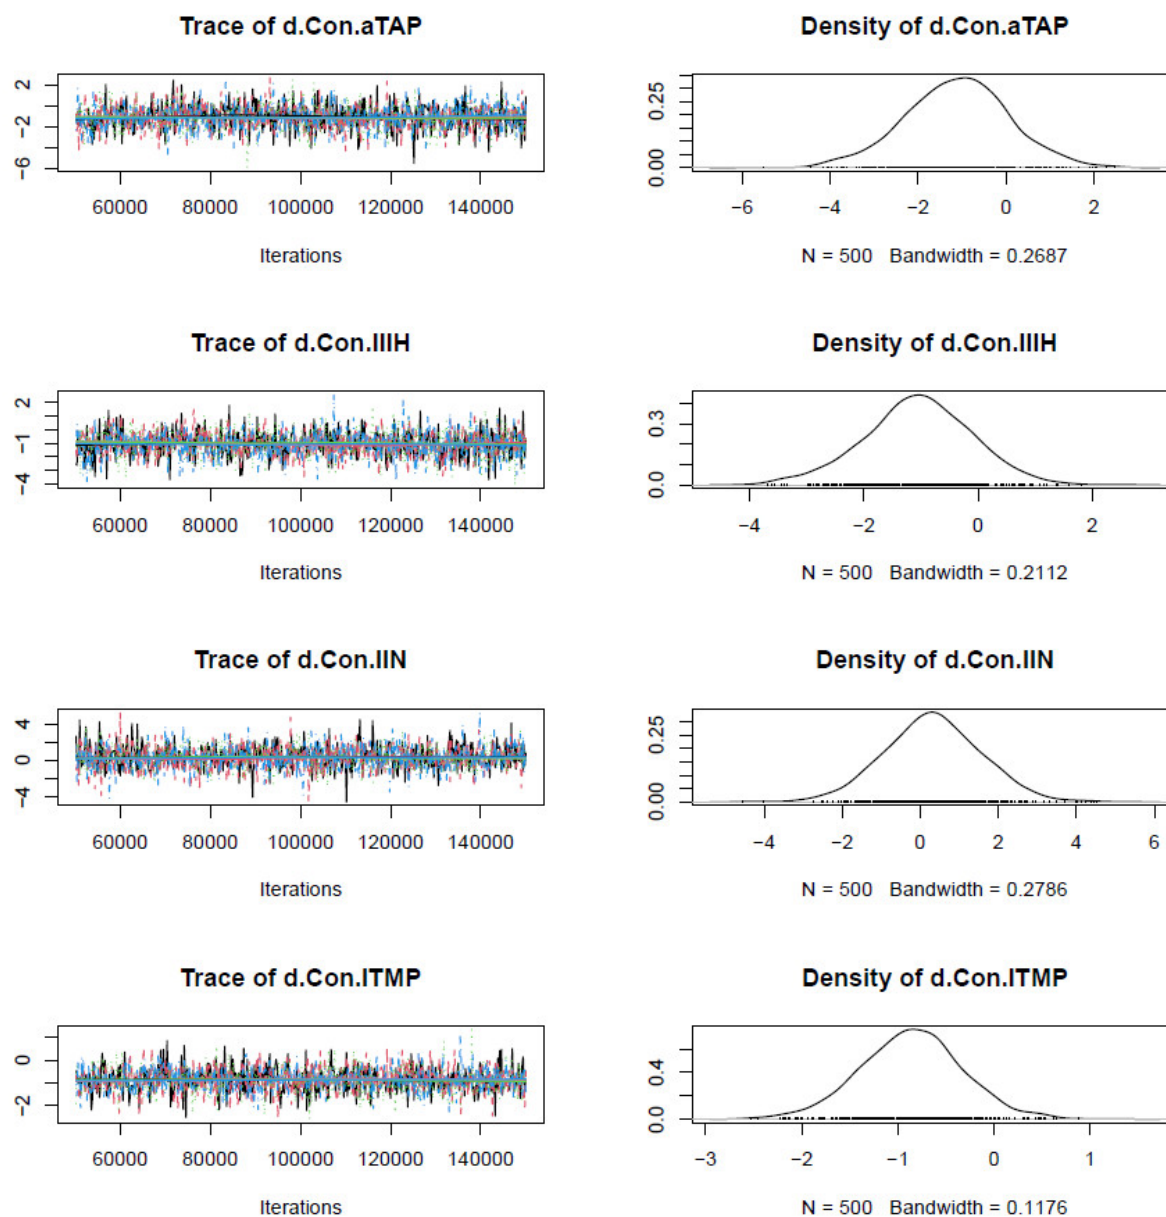

Figure S9. Cont.

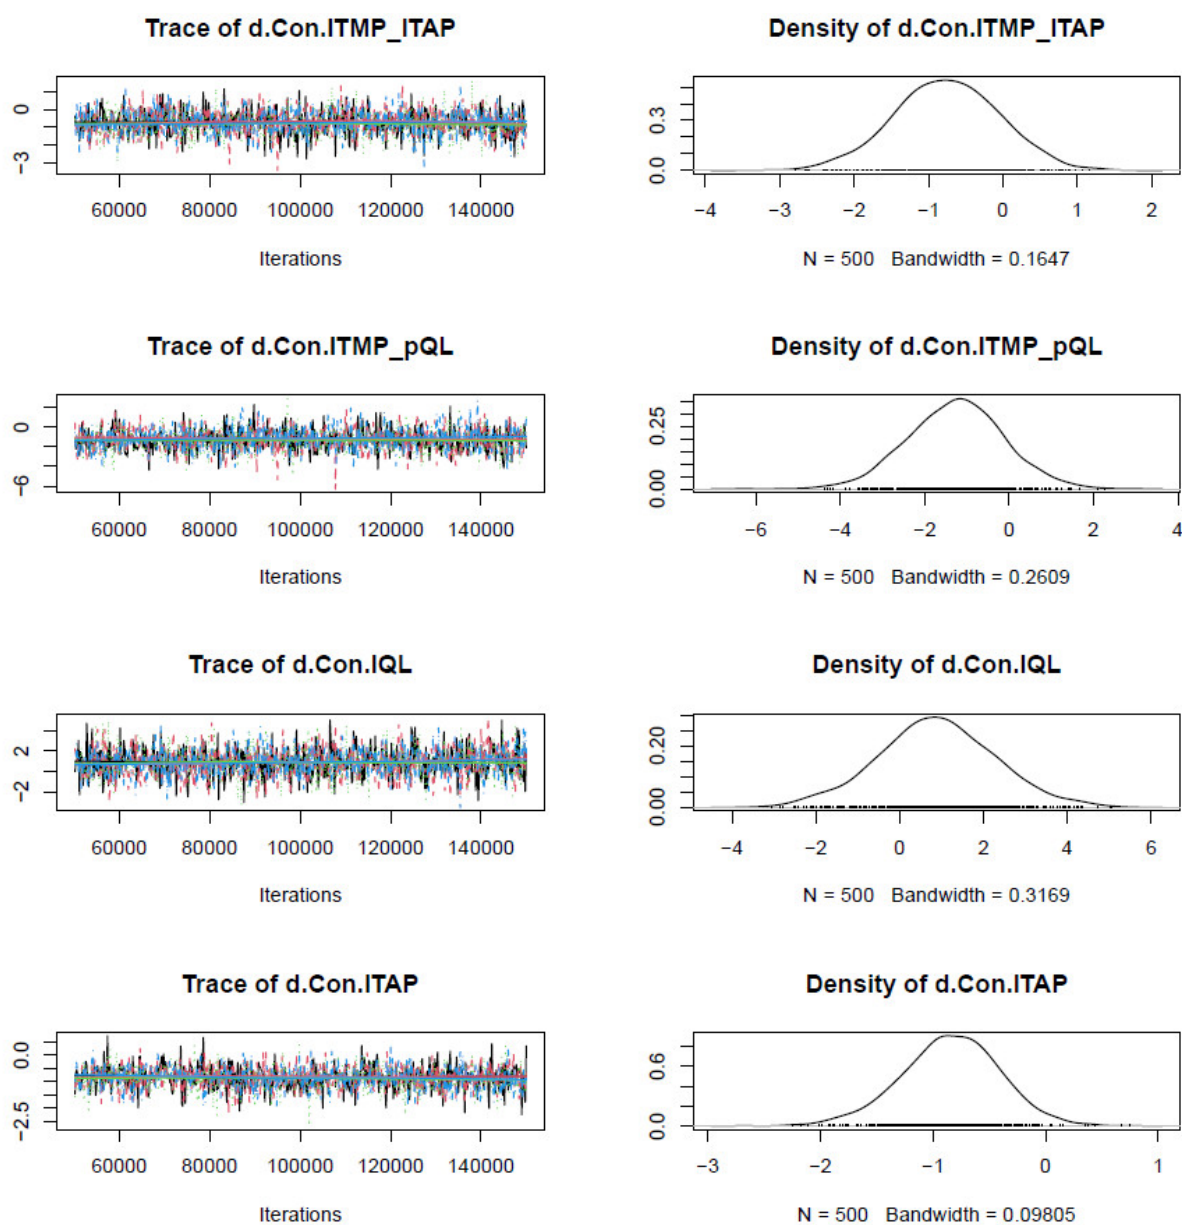

Figure S9. Cont.

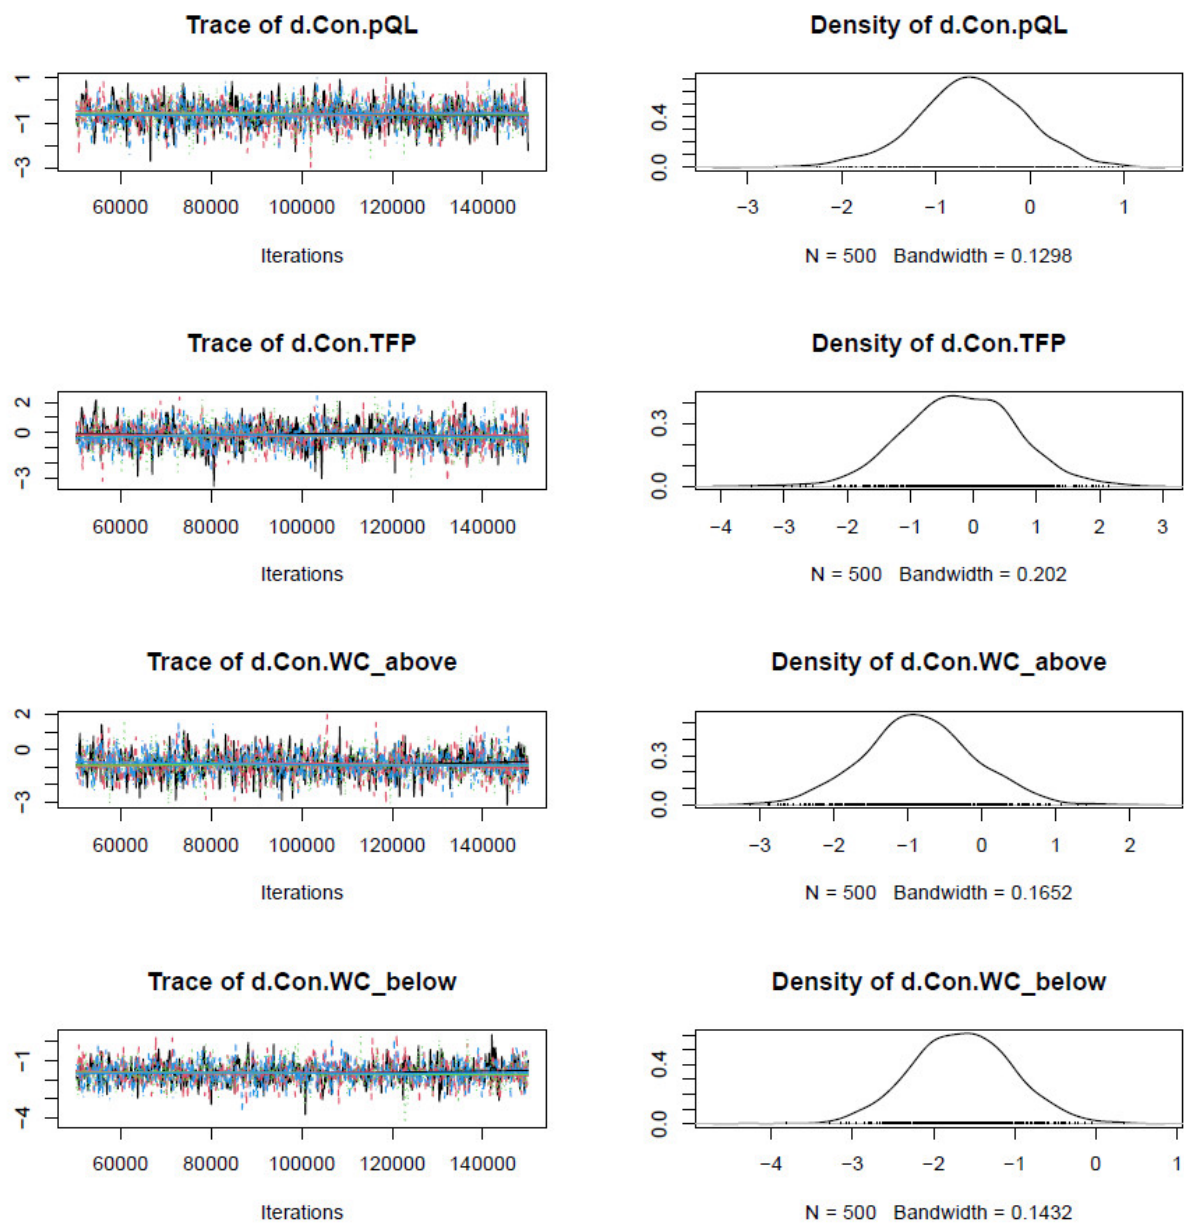

Figure S9. Cont.

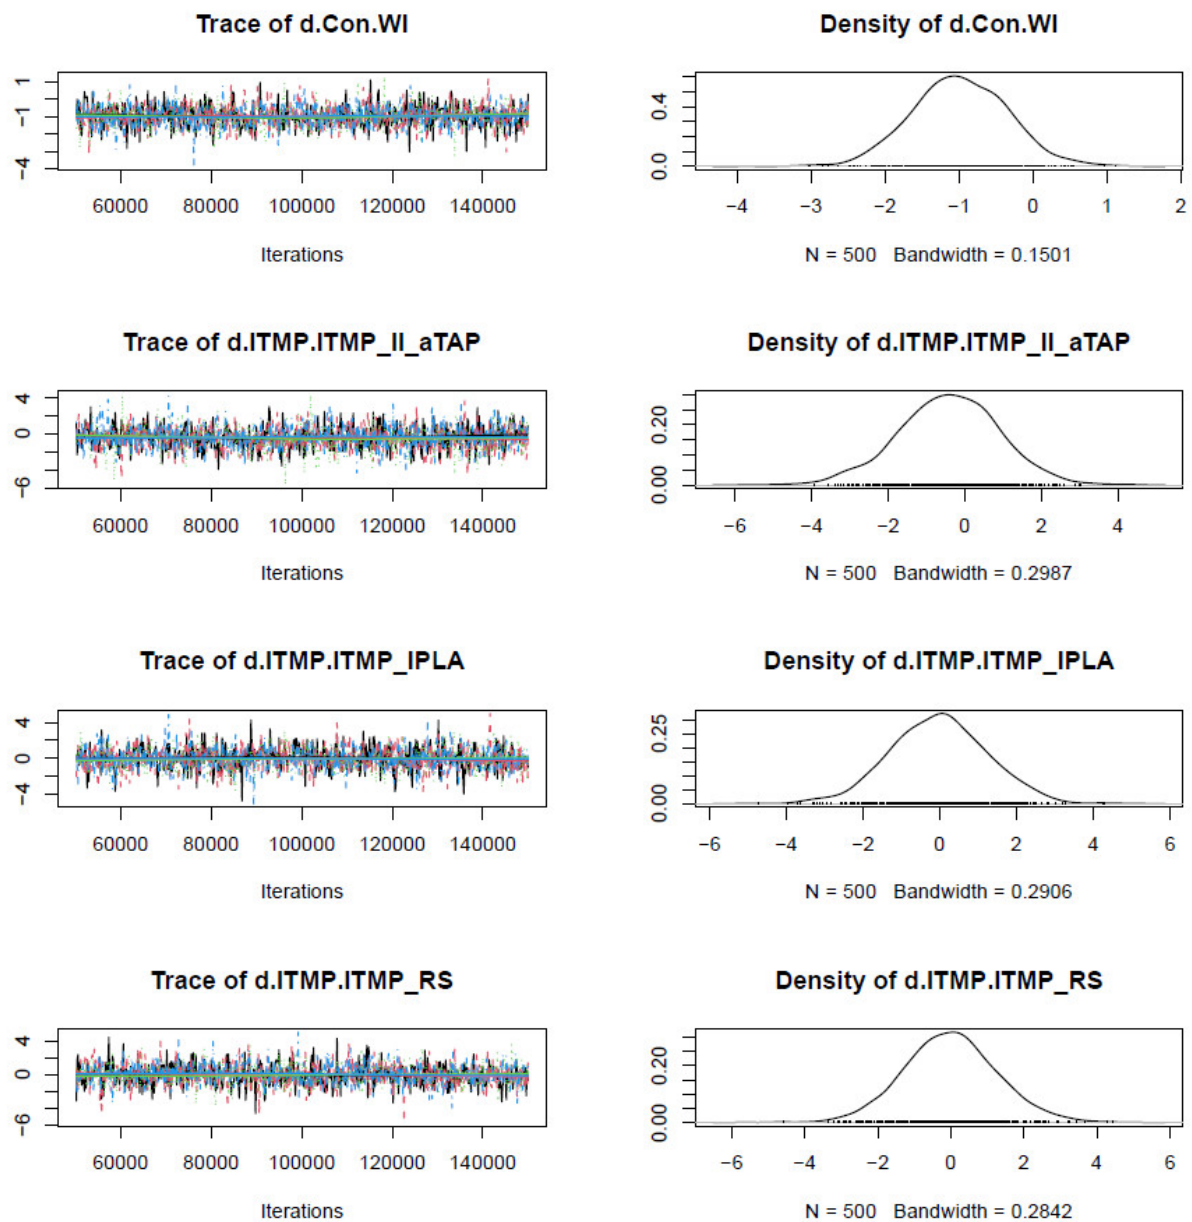

Figure S9. Cont.

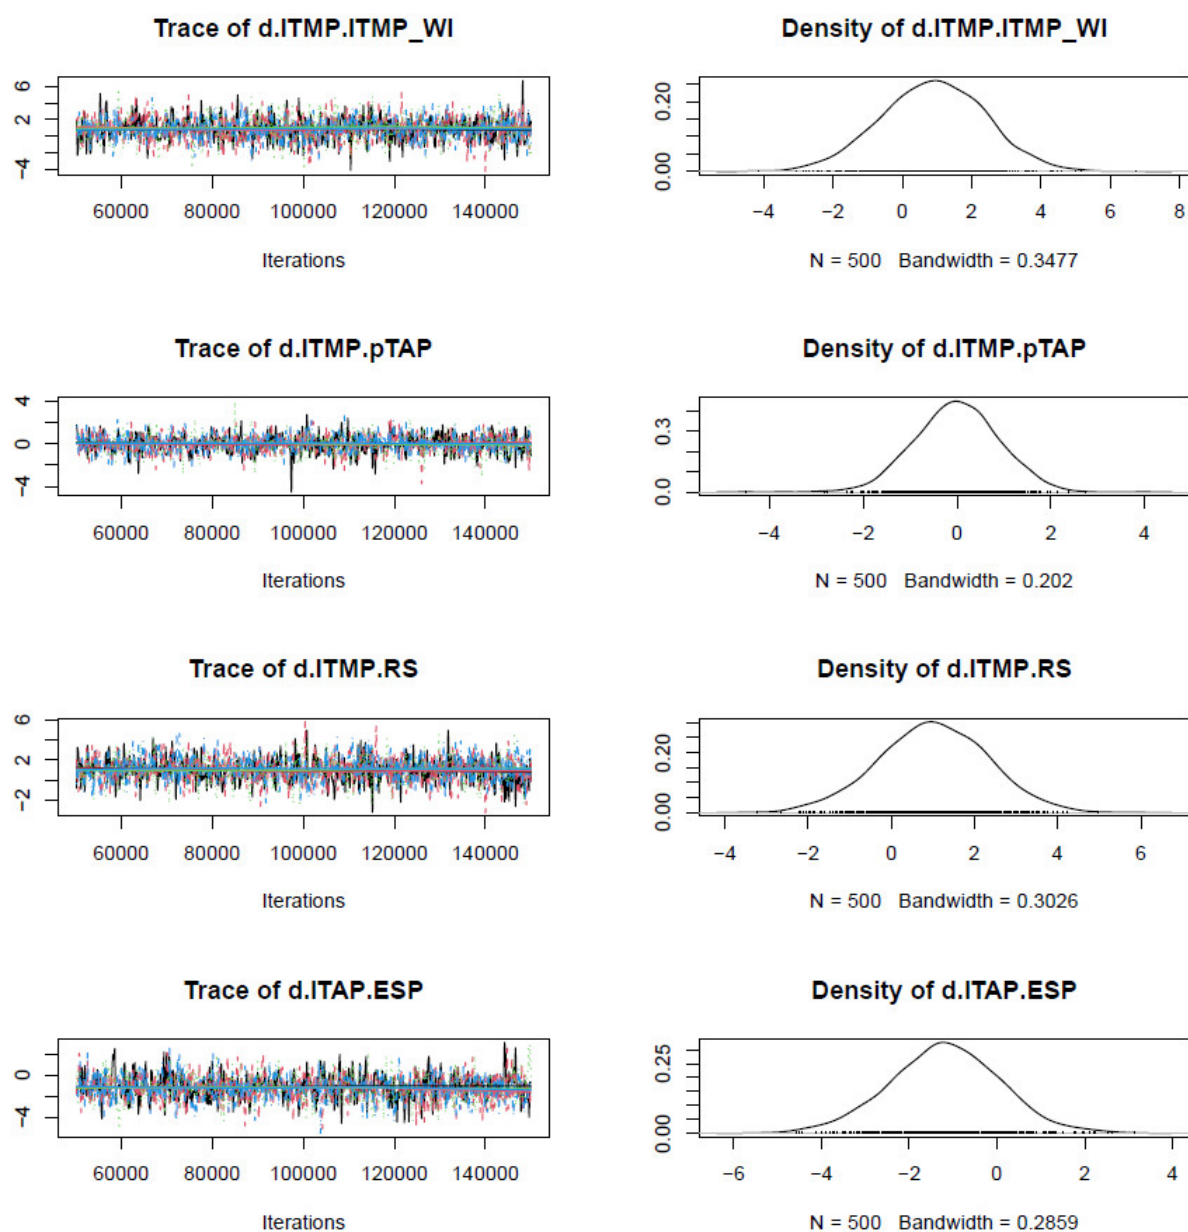

Figure S9. Cont.

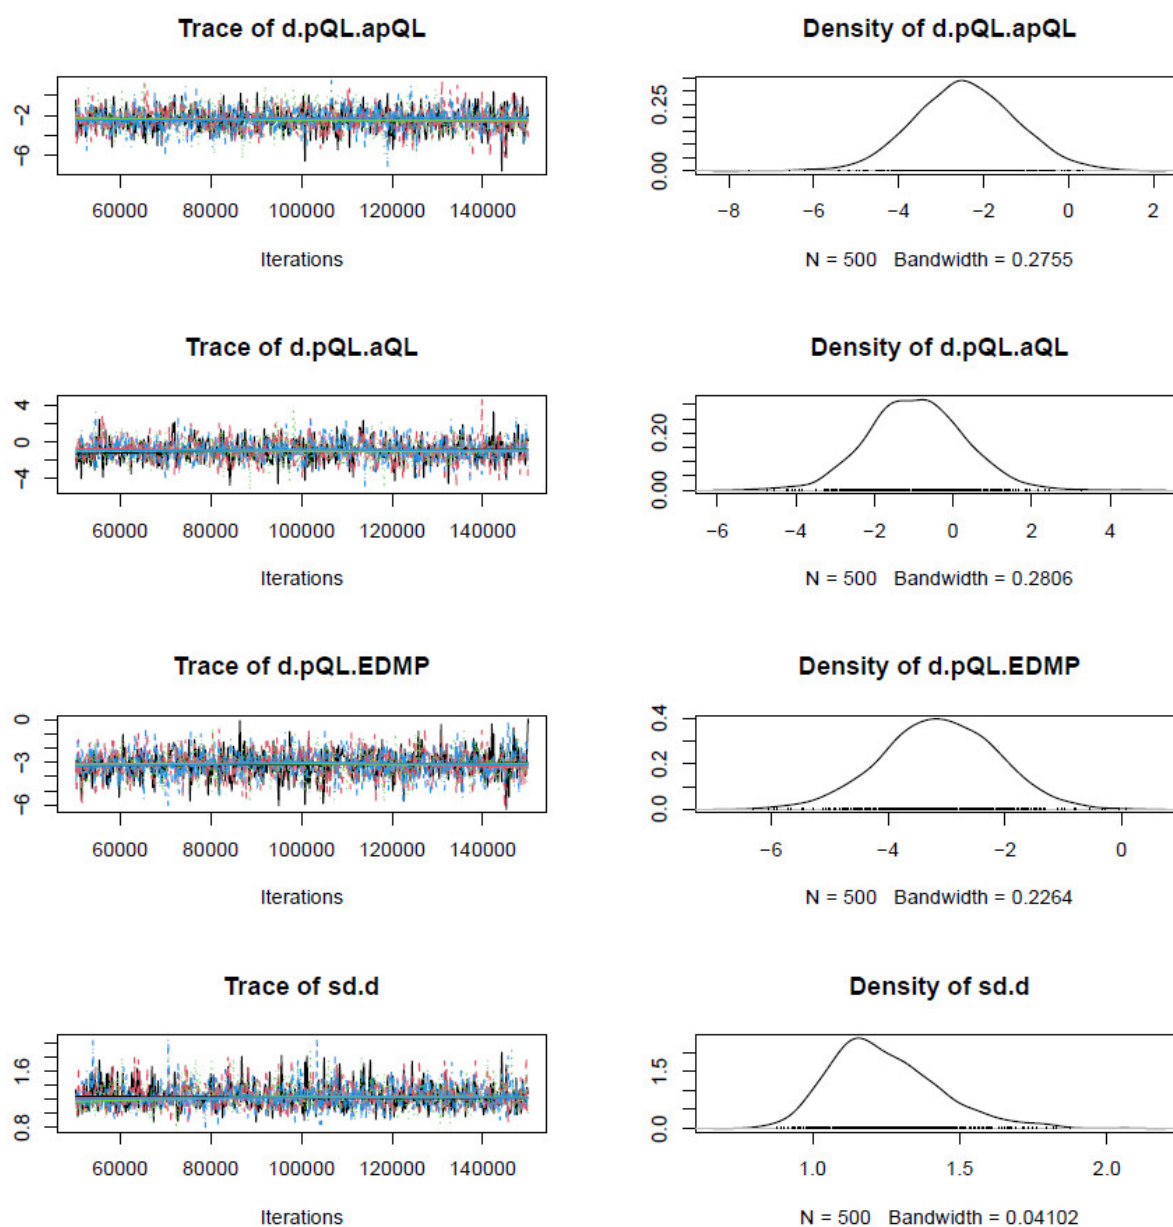

Figure S9. Cont.

(C) Gelman-Rubin-Brooks plot in fixed effect model.

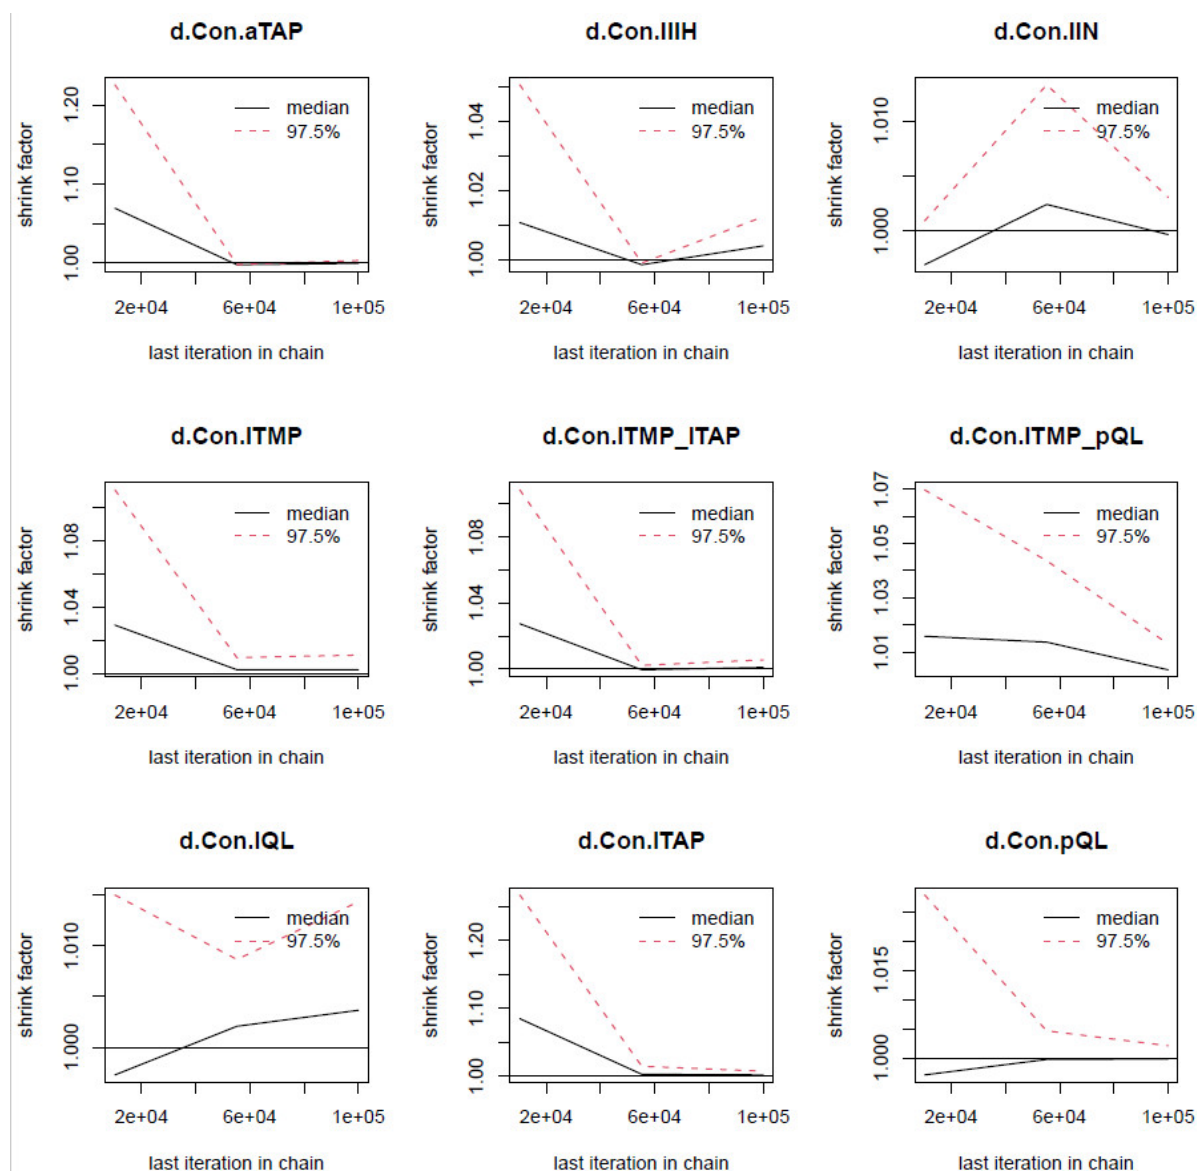

Figure S9. Cont.

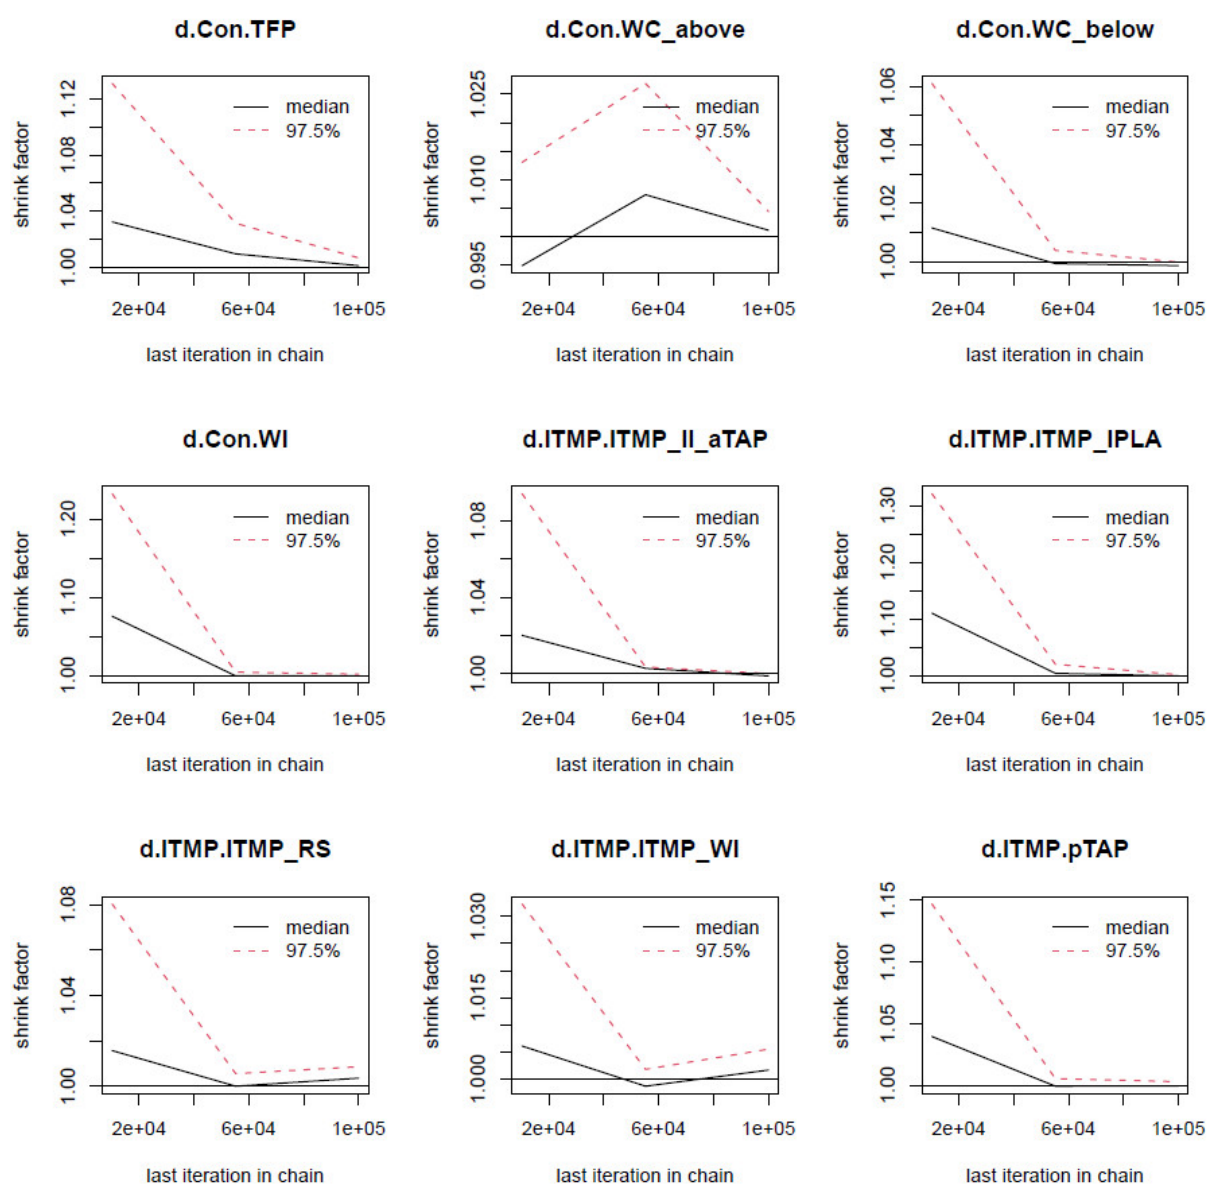

Figure S9. Cont.

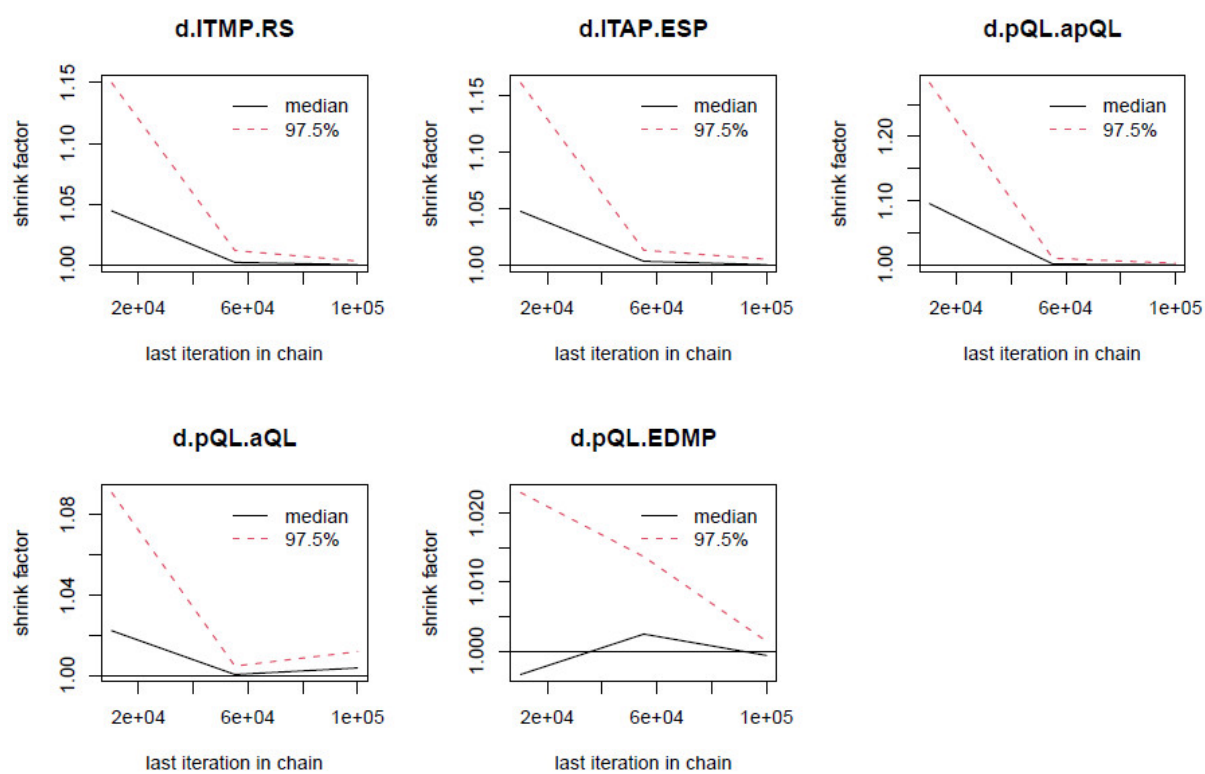

Figure S9. Cont.

(D) Gelman-Rubin-Brooks plot in random effect model.

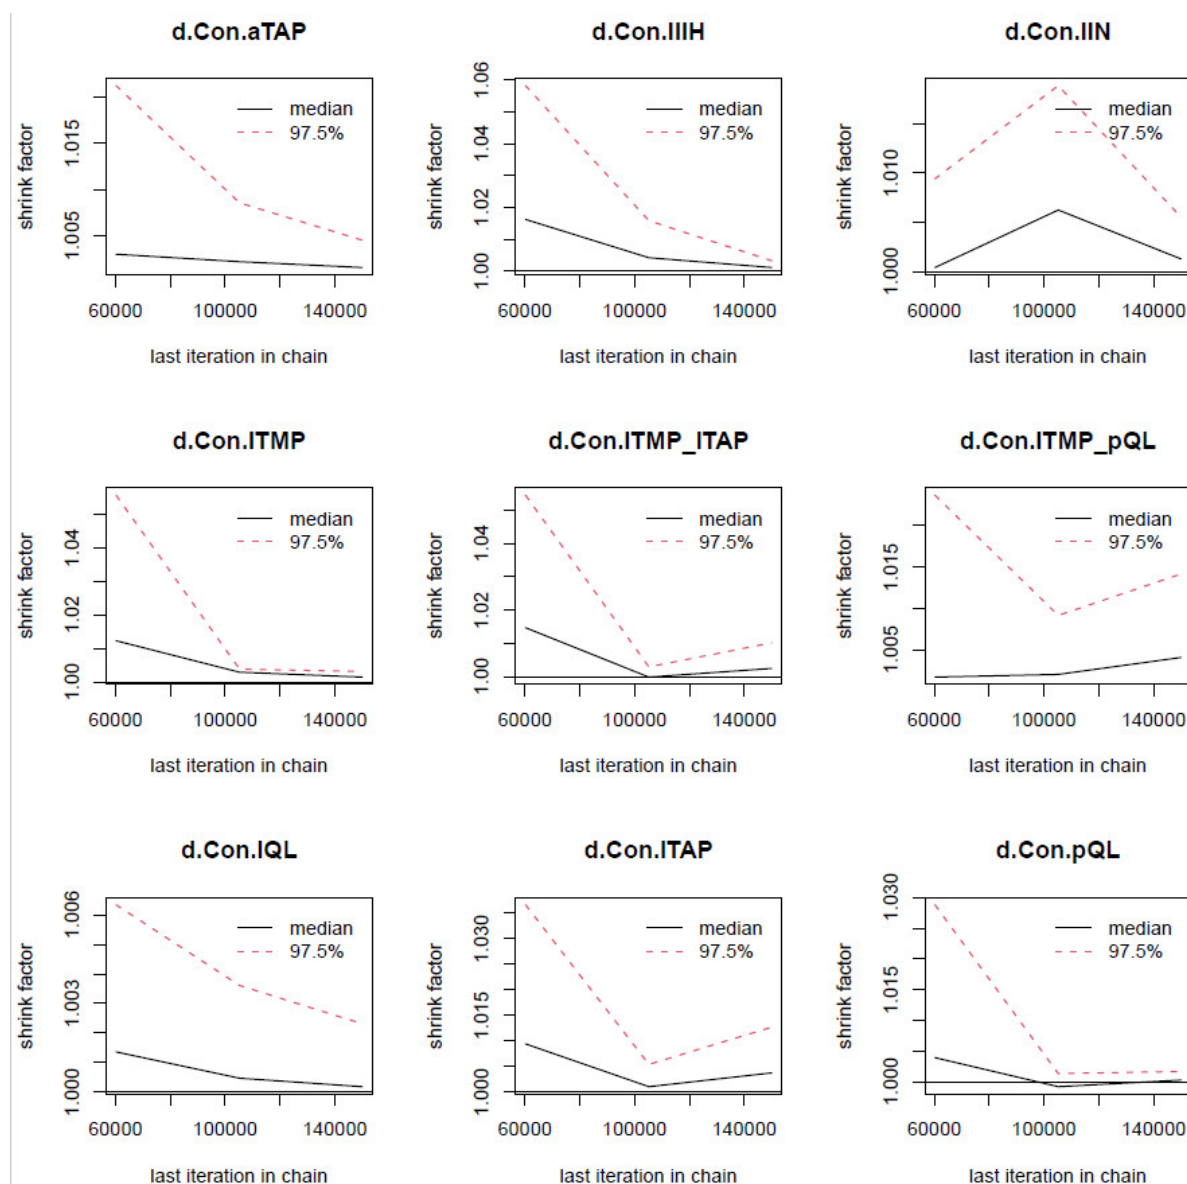

Figure S9. Cont.

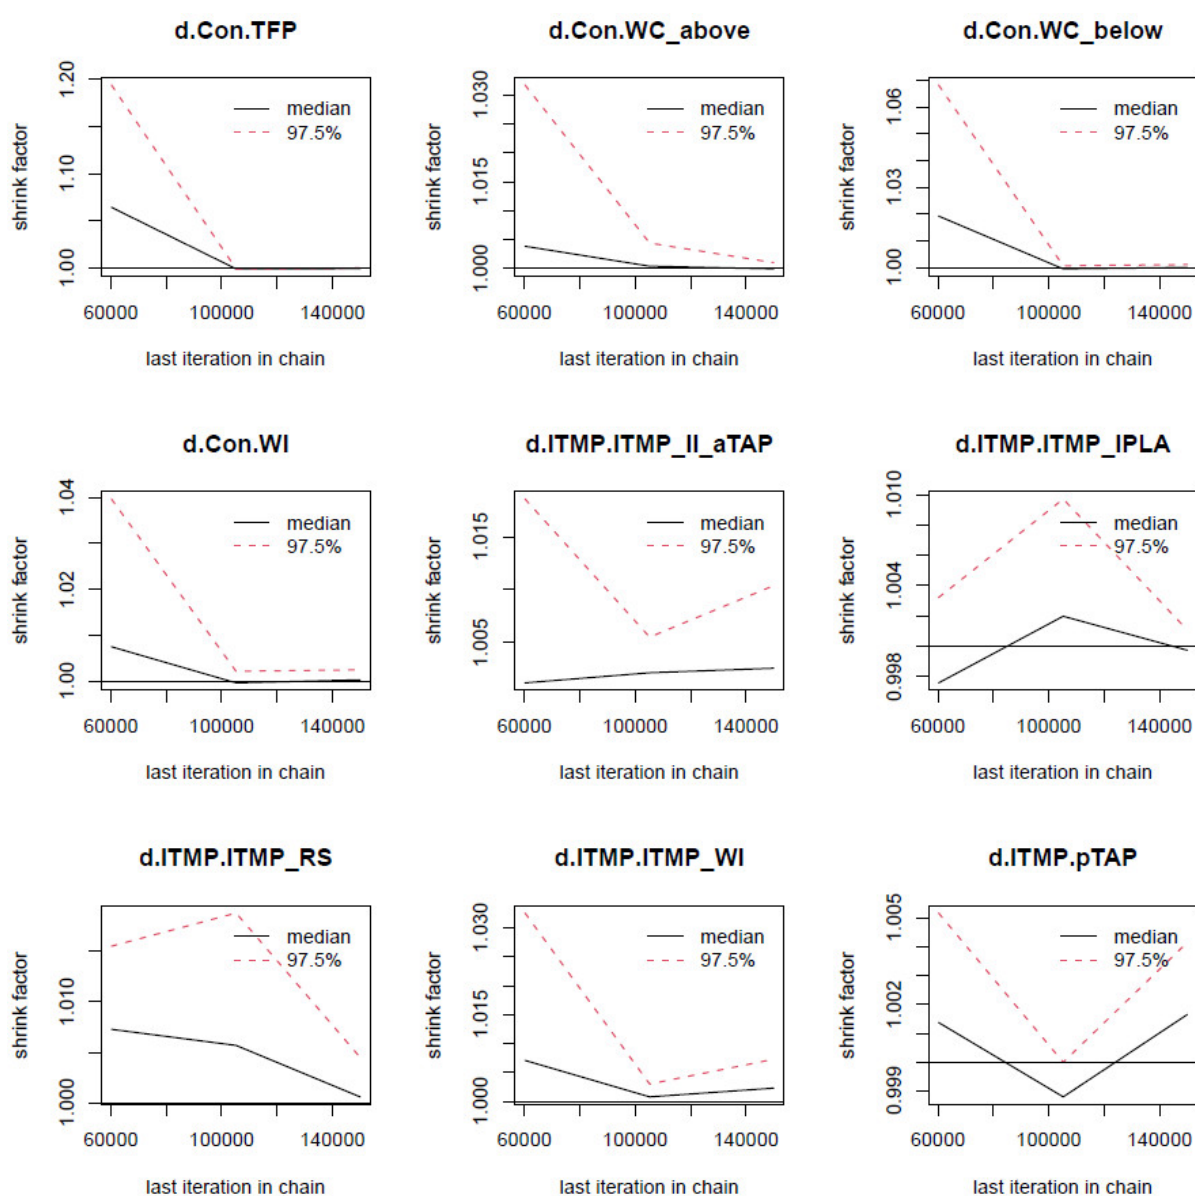

Figure S9. Cont.

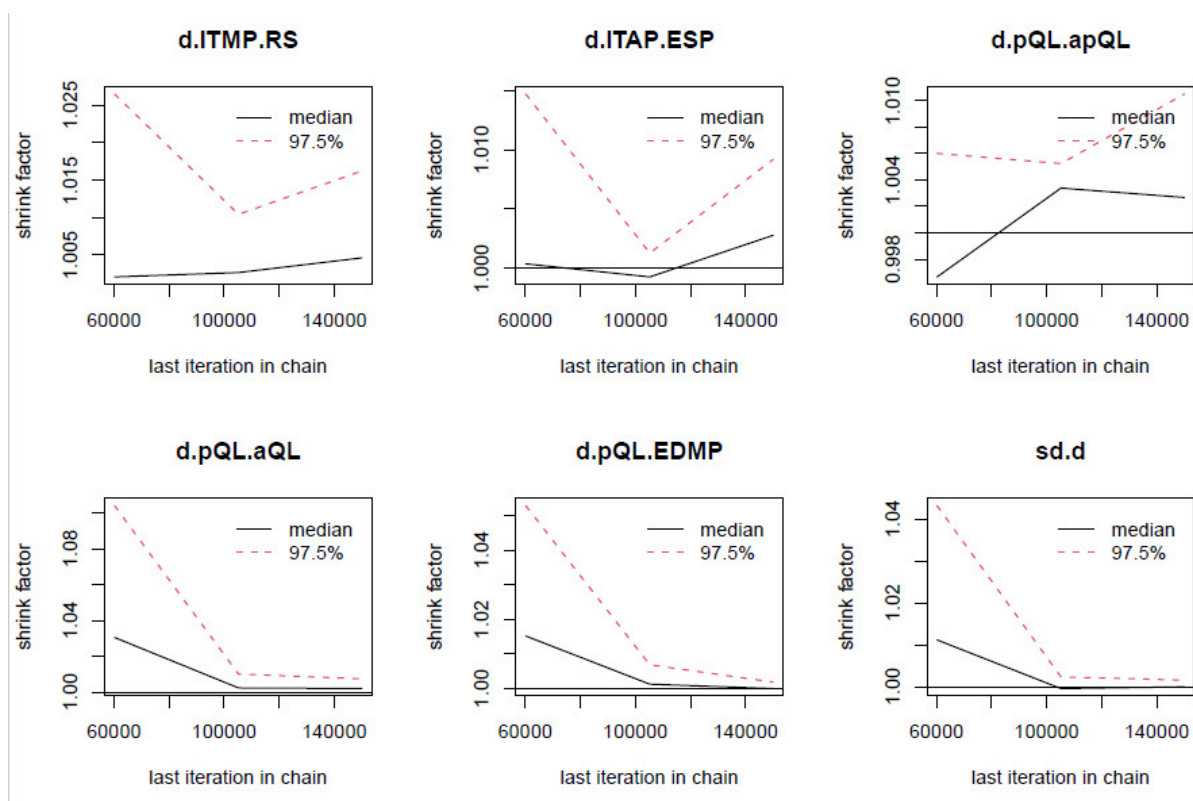

Figure S9. Cont.

(E) Forest plot comparing with control in random effect model.

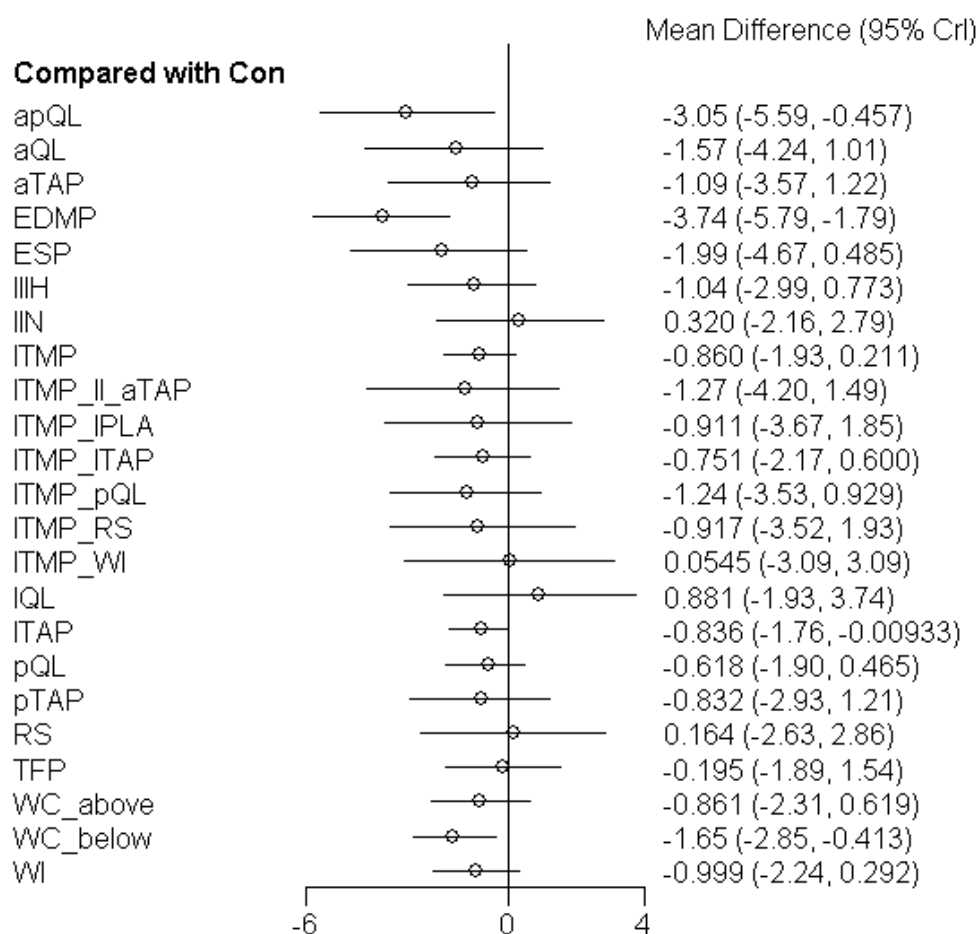

Figure S9. Cont.

(F) Node splitting plot in random effect model.

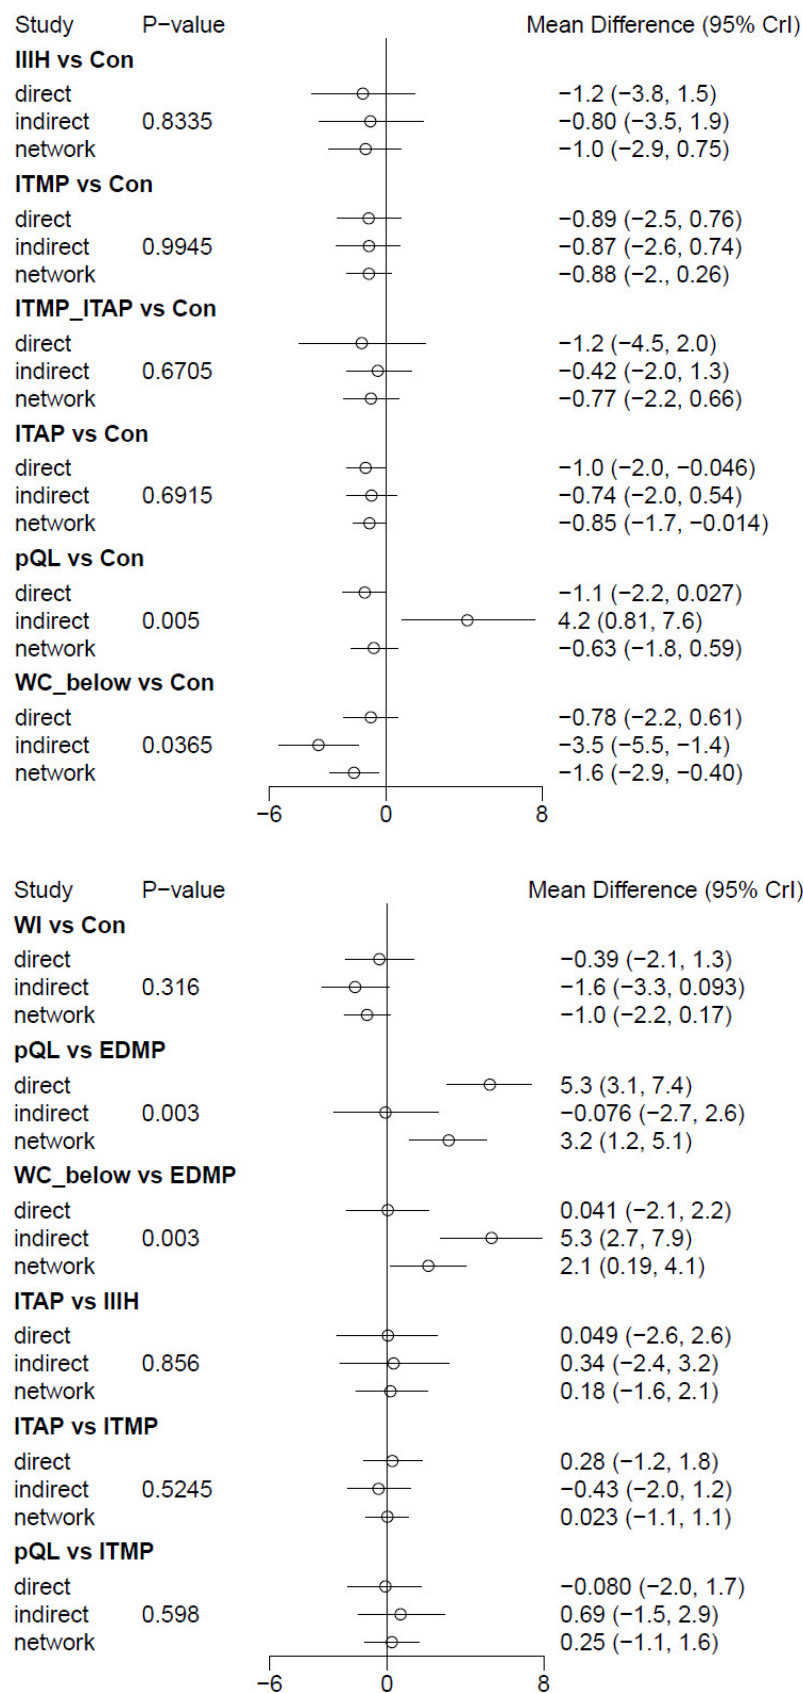

Figure S9. Cont.

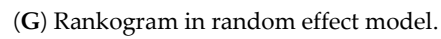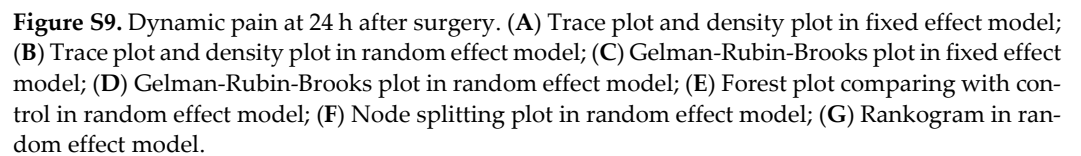

(A) Trace plot and density plot in fixed effect model.

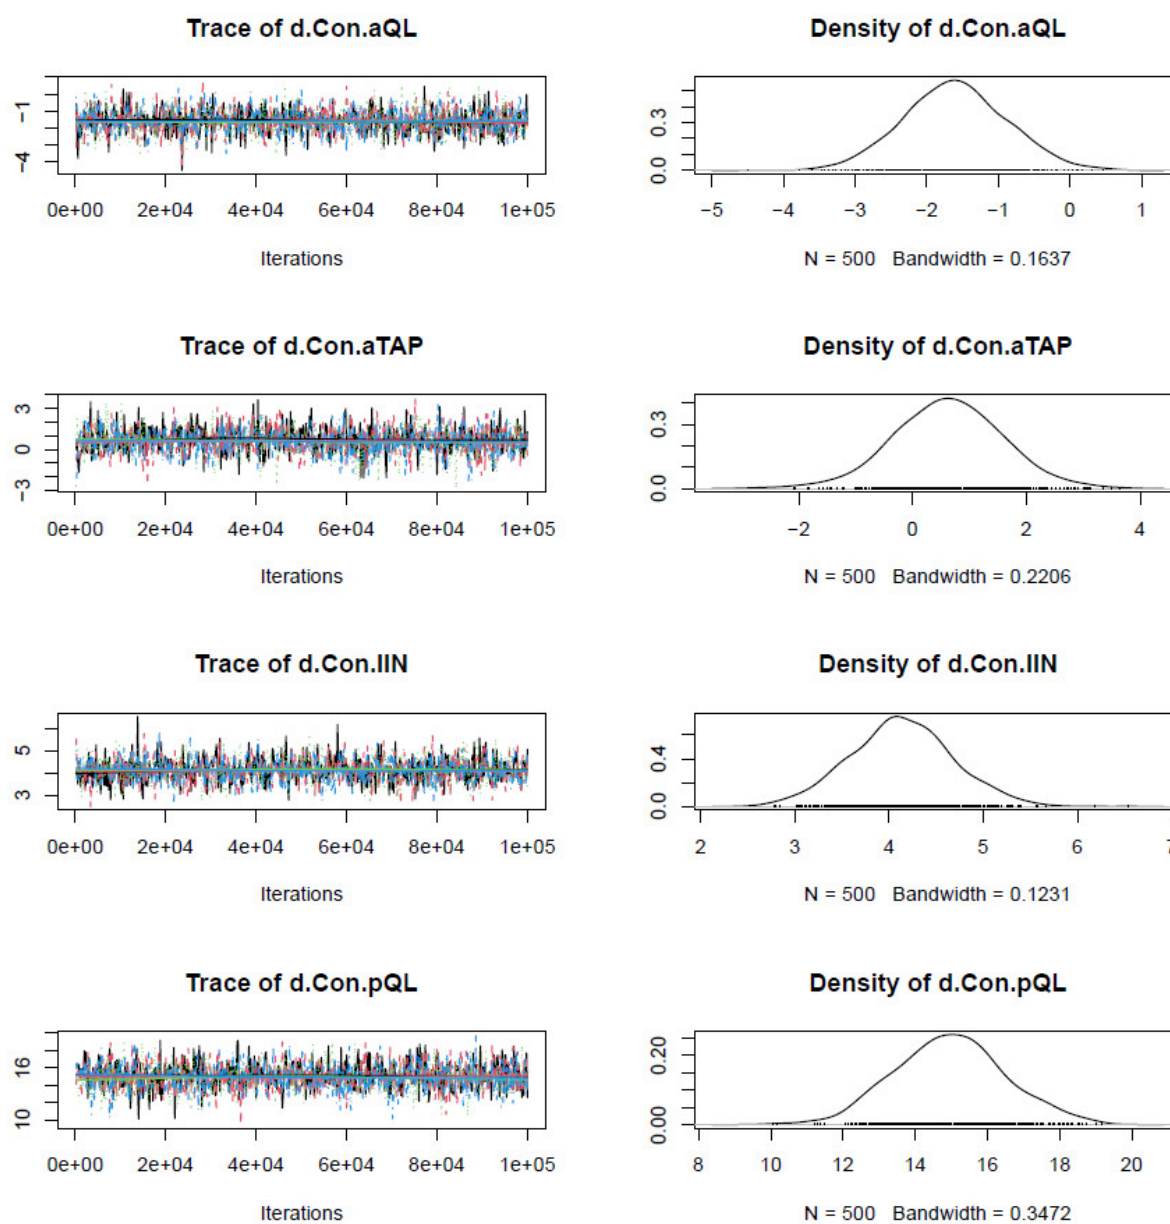

Figure S10. Cont.

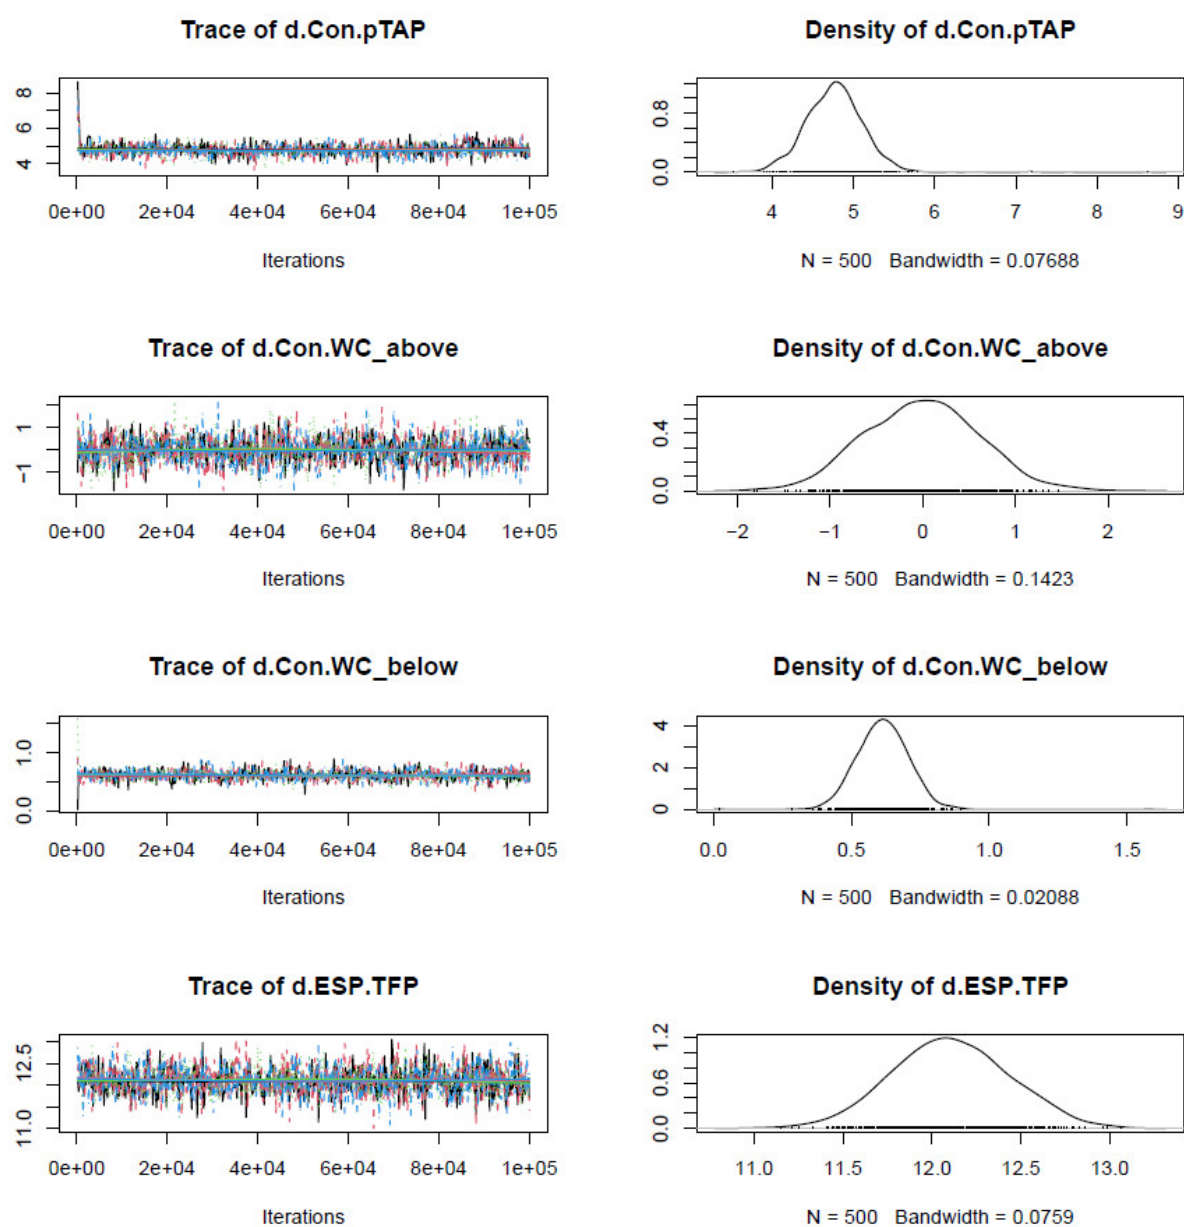

Figure S10. Cont.

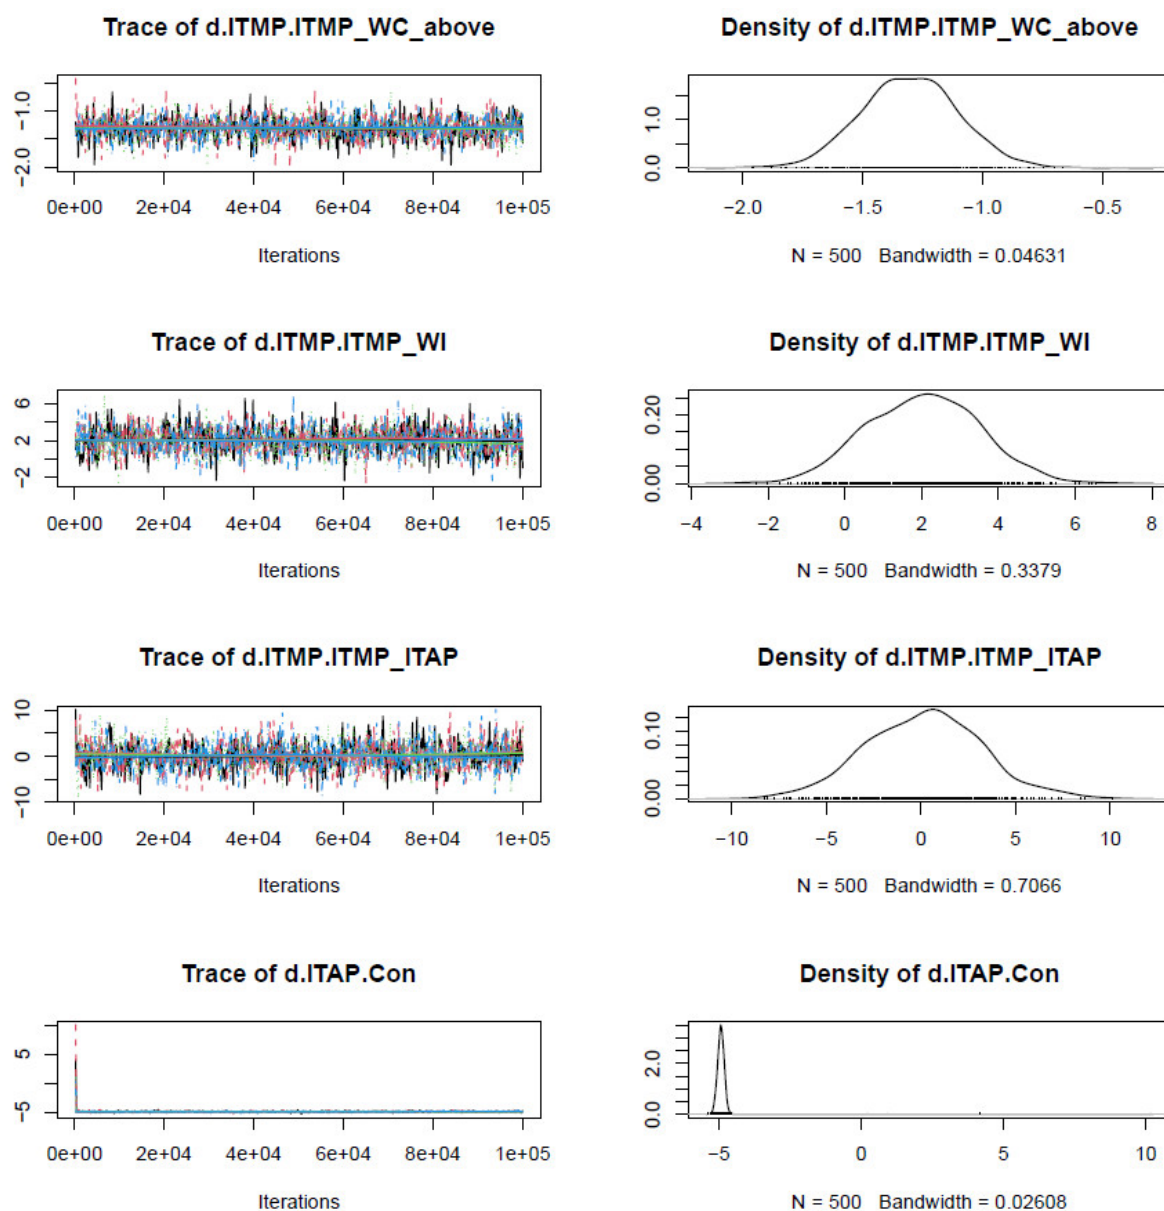

Figure S10. Cont.

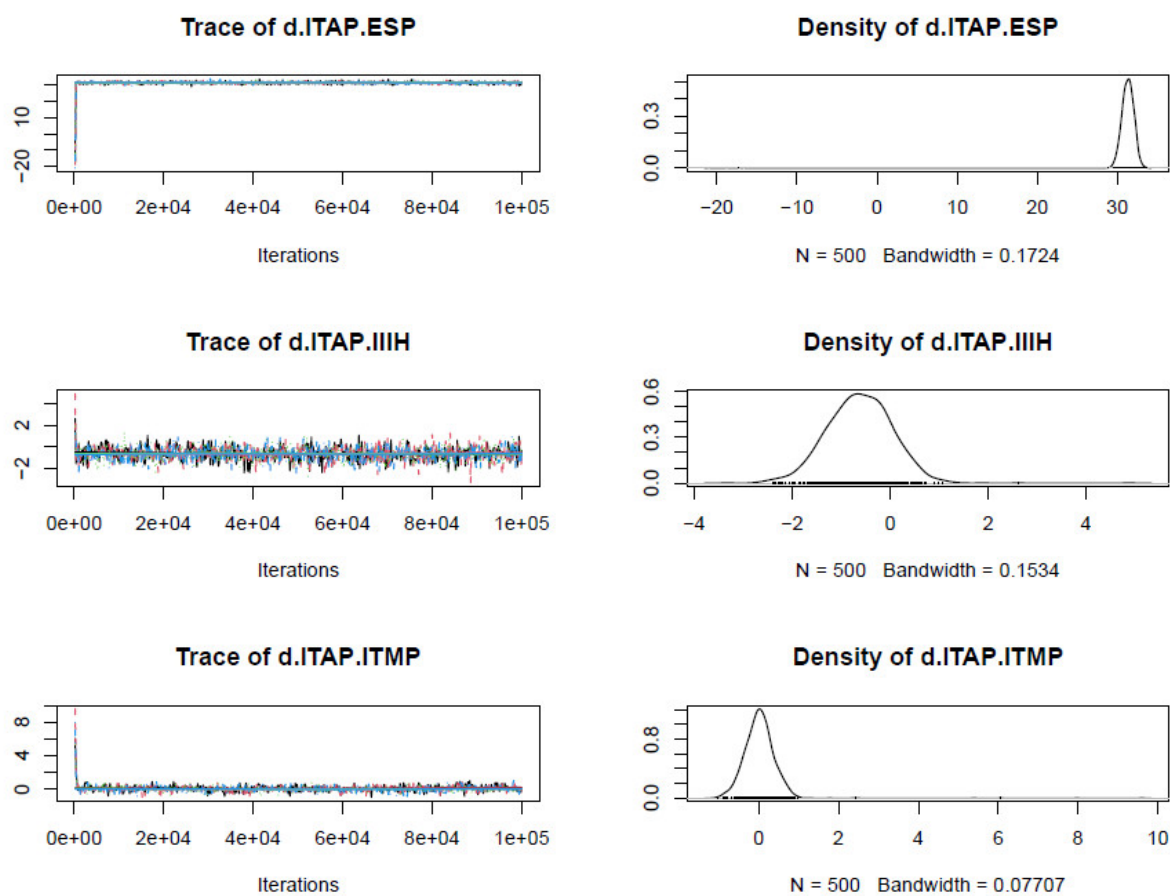

Figure S10. Cont.

(B) Trace plot and density plot in random effect model.

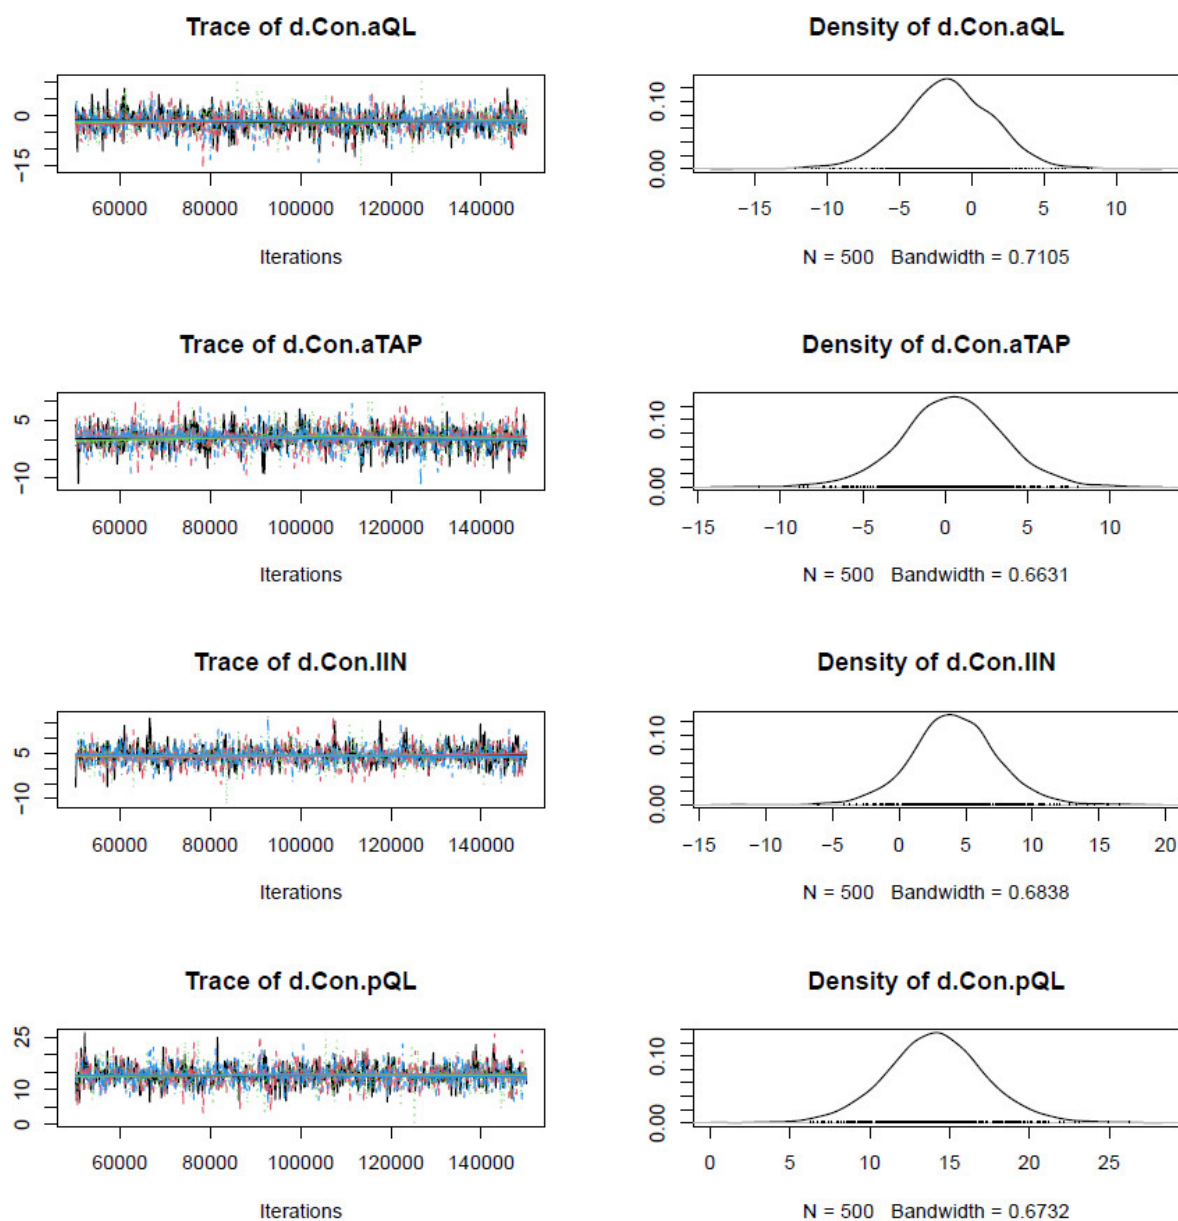

Figure S10. Cont.

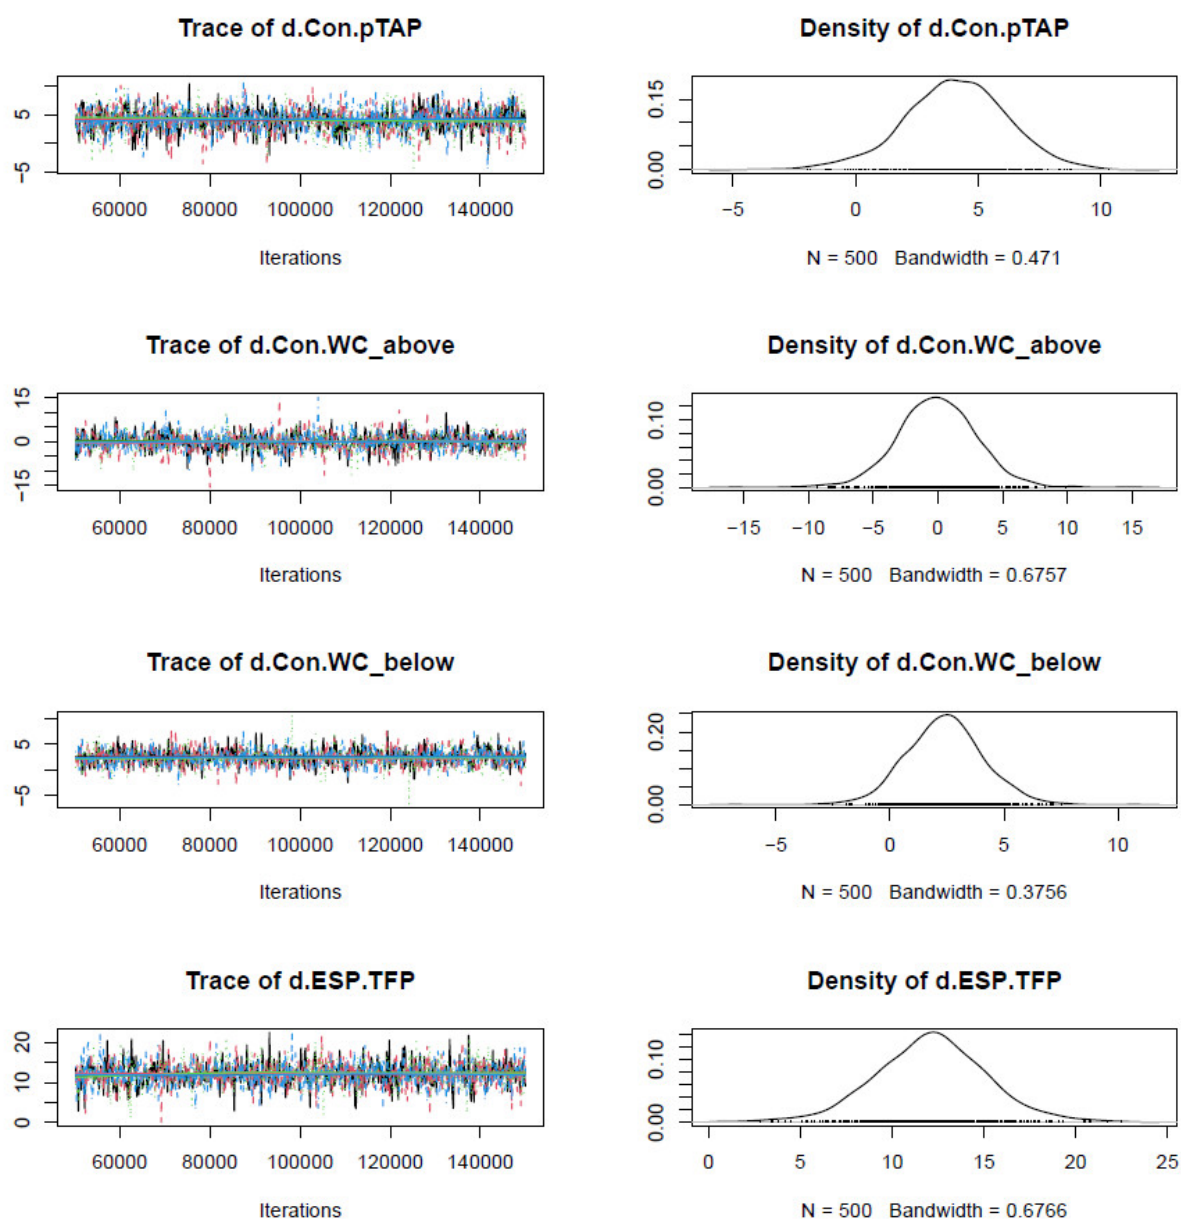

Figure S10. Cont.

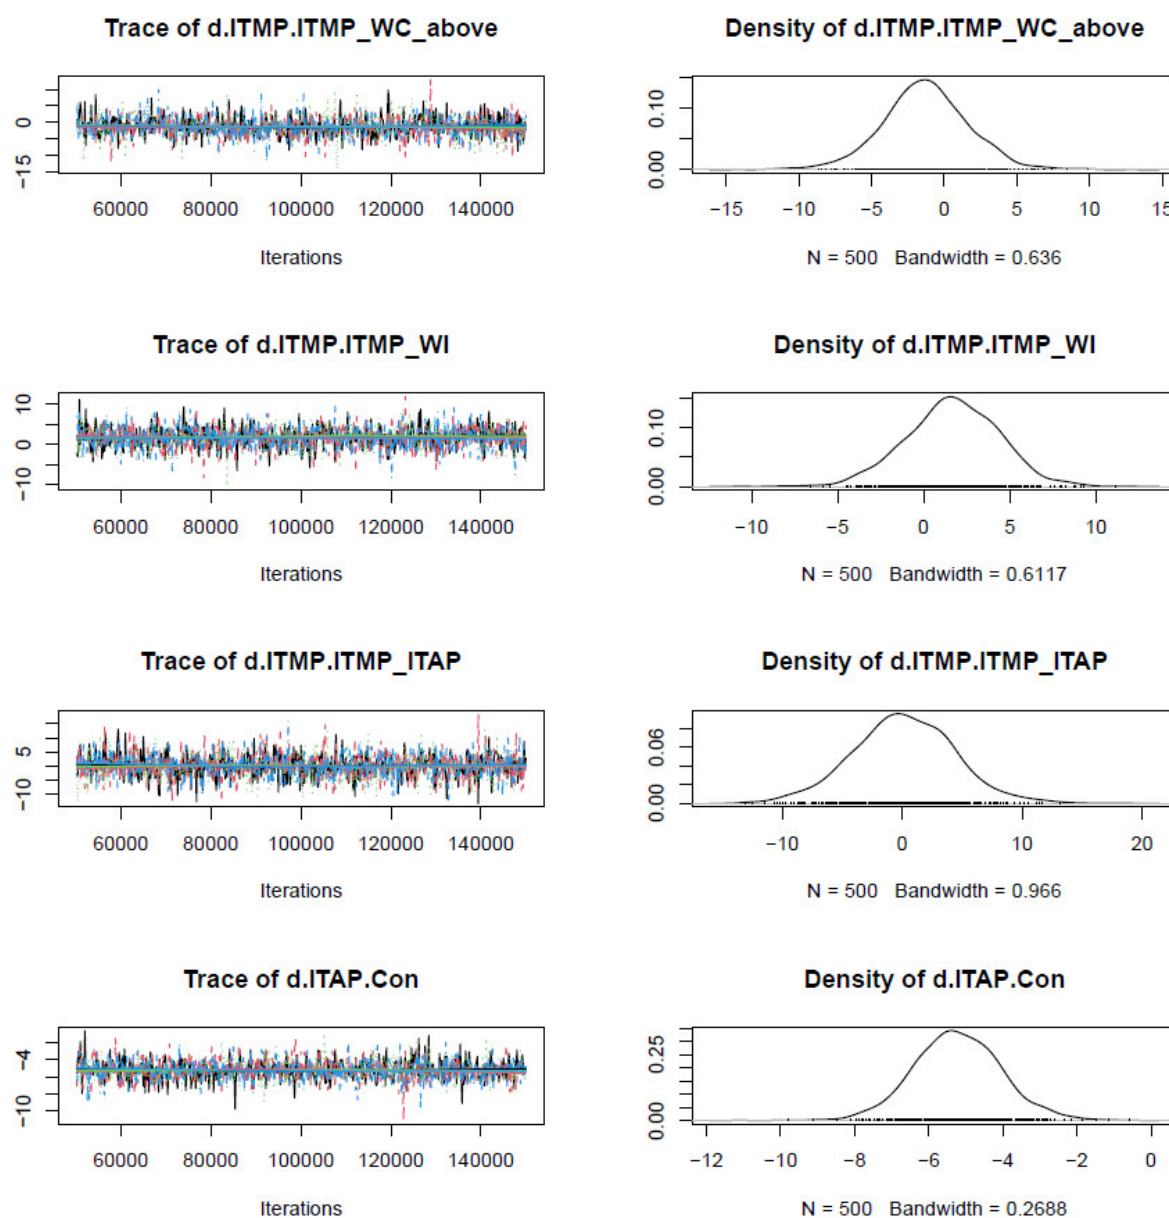

Figure S10. Cont.

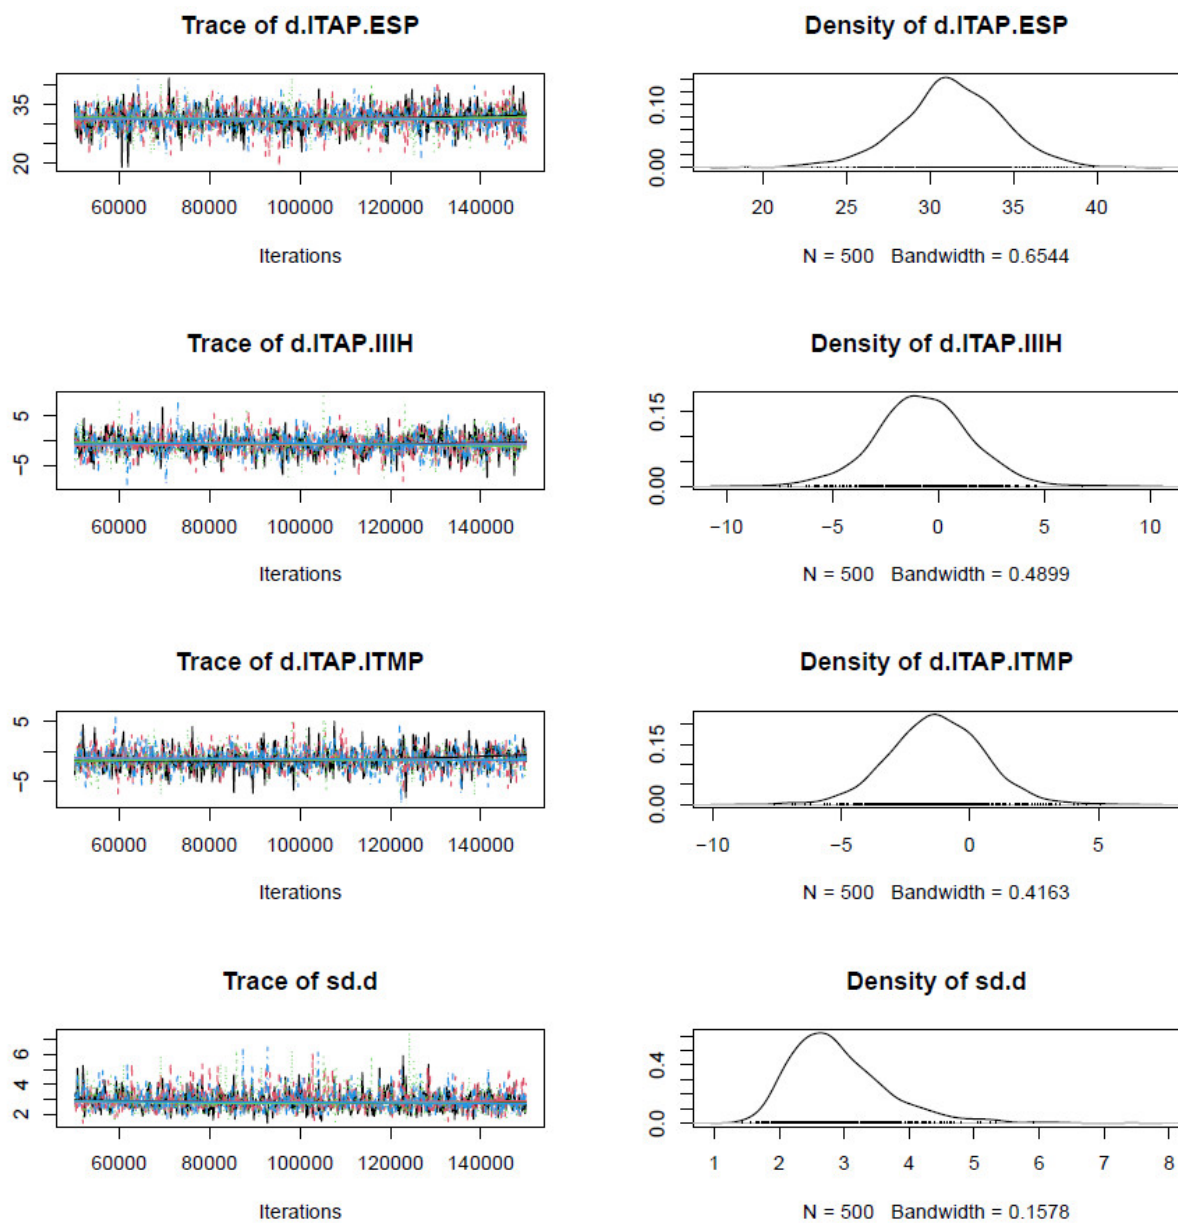

Figure S10. Cont.

(C) Gelman-Rubin-Brooks plot in fixed effect model.

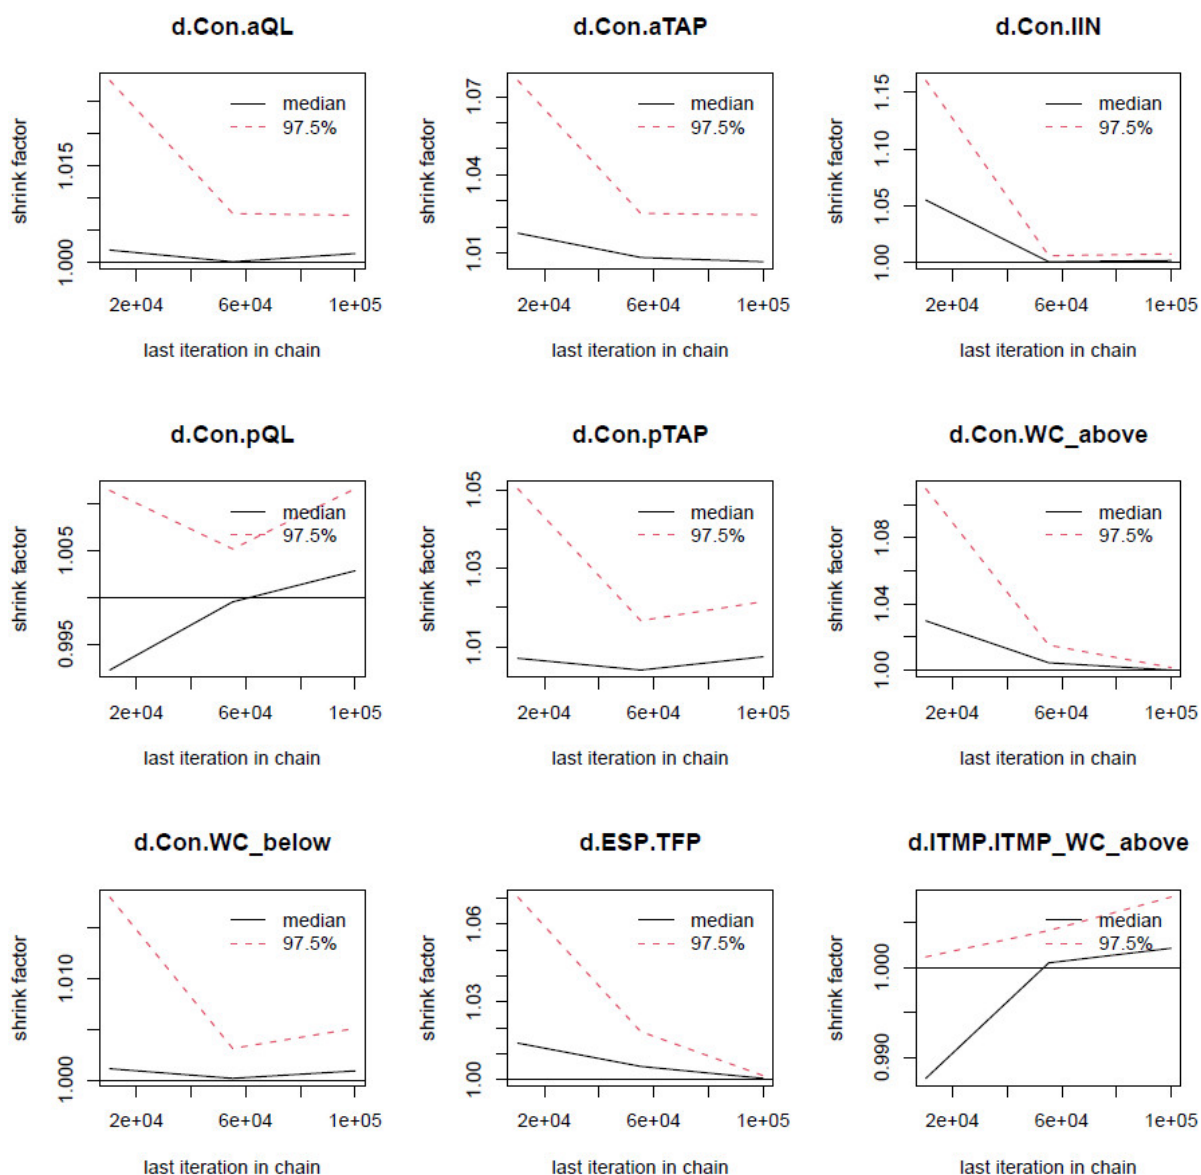

Figure S10. Cont.

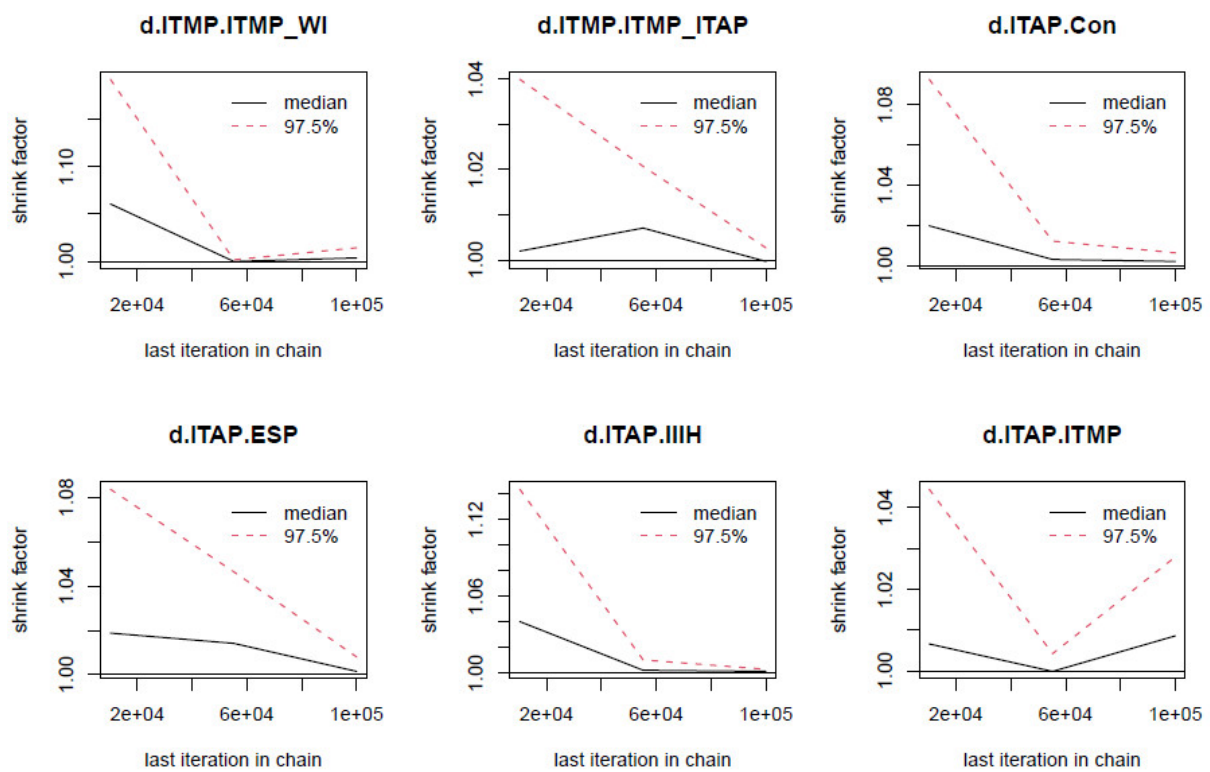

Figure S10. Cont.

(D) Gelman-Rubin-Brooks plot in random effect model.

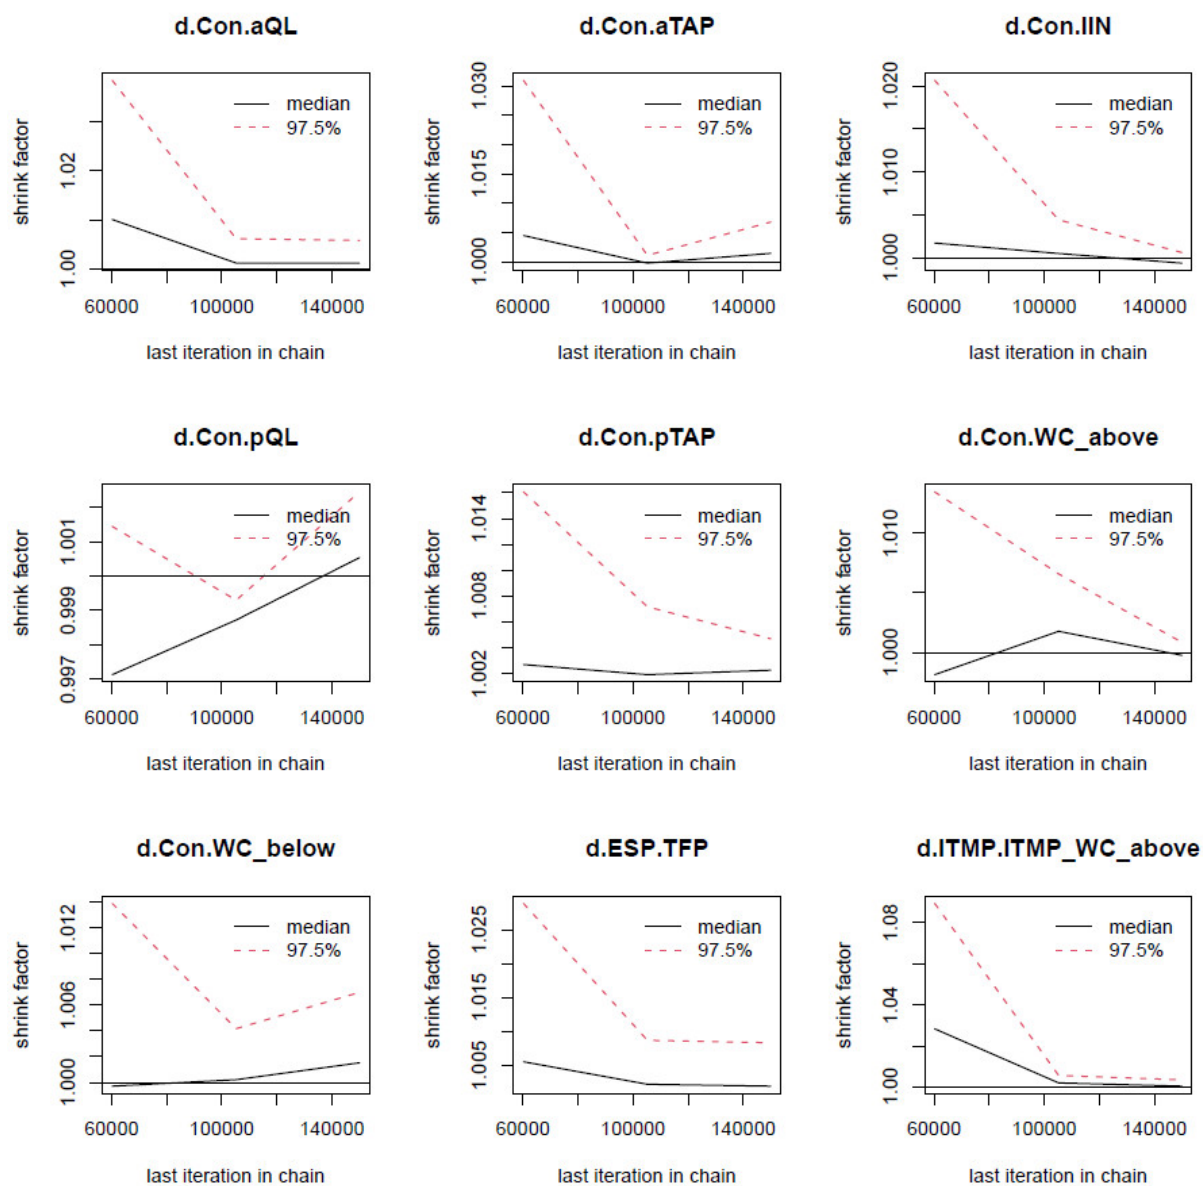

Figure S10. Cont.

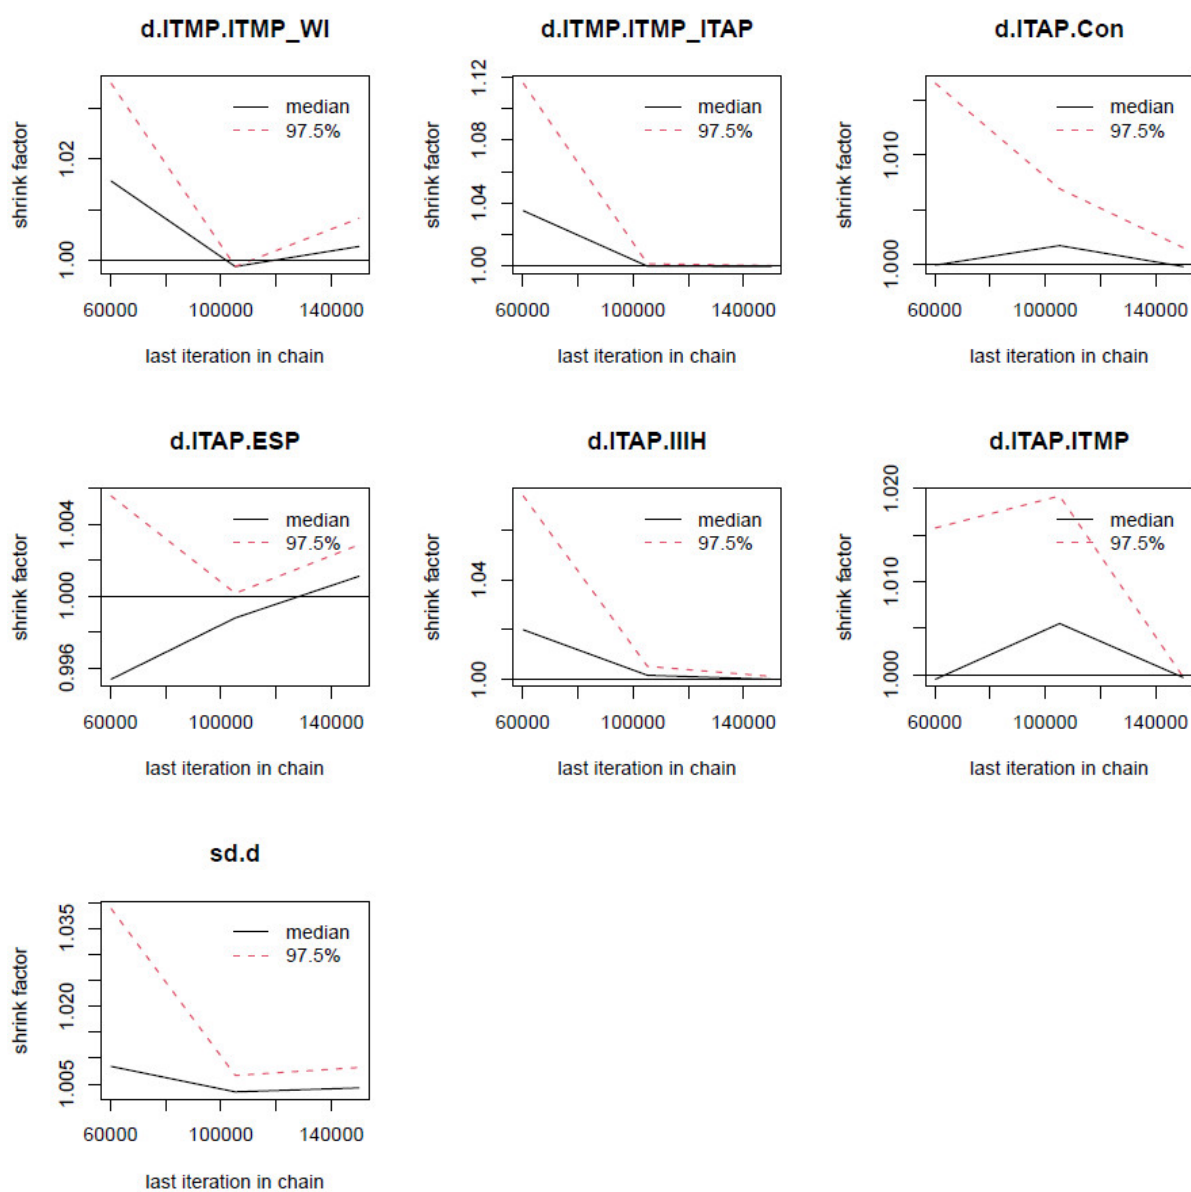

Figure S10. Cont.

(E) Forest plot comparing with control in random effect model.

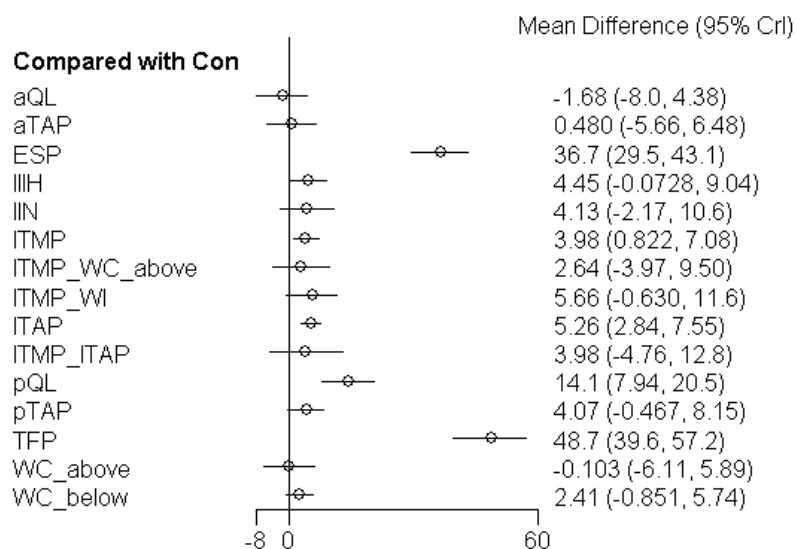

**Figure S10.** The time to first analgesic request. (A) Trace plot and density plot in fixed effect model; (B) Trace plot and density plot in random effect model; (C) Gelman-Rubin-Brooks plot in fixed effect model; (D) Gelman-Rubin-Brooks plot in random effect model; (E) Forest plot comparing with control in random effect model.

**Table S1.** Summary of risk of bias assessment (RoB 2).

| ID | Author, Year                  | Randomization Process                                                             | Intended Intervention                                                   | Missing Outcome Data                                       | Measurement of the Outcome                              | Selection of the Reported Result | Overall RoB   |
|----|-------------------------------|-----------------------------------------------------------------------------------|-------------------------------------------------------------------------|------------------------------------------------------------|---------------------------------------------------------|----------------------------------|---------------|
| 1  | Aydin et al., 2020 [16]       | low<br>random number sealed envelopes                                             | low<br>both blinded                                                     | low<br>no exclusion                                        | low<br>blinded                                          | low<br>predefined outcomes       | low           |
| 2  | Aydogmus et al., 2014 [17]    | Some concerns<br>no statement for allocation concealment random code              | Some concerns<br>different PNB, no information about trial context      | low<br>no exclusion                                        | Some concerns<br>no specific information                | Some concerns<br>no information  | Some concerns |
| 3  | Baaj et al., 2010 [18]        | Some concerns<br>no specific information                                          | low<br>both blinded                                                     | low<br>no exclusion                                        | Some concerns<br>no specific information                | Some concerns<br>no information  | Some concerns |
| 4  | Bamigboye et al., 2008 [19]   | low<br>random number sealed envelopes                                             | low<br>both blinded                                                     | low<br>no exclusion                                        | low<br>blinded                                          | Some concerns<br>no information  | Some concerns |
| 5  | Barney et al., 2020 [20]      | low<br>random number central allocation block                                     | low<br>both blinded                                                     | low<br>6/77 dropped, unrelated to the outcome              | low<br>blinded                                          | low<br>predefined outcomes       | low           |
| 6  | Belavy et al., 2009 [21]      | low<br>randomization table central allocation computer-generated code             | low<br>both blinded                                                     | low<br>3/50 dropped, 1 in intervention due to complication | low<br>blinded                                          | low<br>predefined outcomes       | low           |
| 7  | Bell et al., 2002 [22]        | low<br>central allocation no statement for sequence generation envelope technique | low<br>both blinded                                                     | low<br>11/90 dropout (6 in study and 5 in control group)   | Some concerns<br>no specific information                | Some concerns<br>no information  | Some concerns |
| 8  | Bensghir et al., 2008 [23]    | low<br>no statement for sequence generation envelope technique                    | low<br>both blinded                                                     | low<br>no exclusion                                        | low<br>blinded                                          | Some concerns<br>no information  | Some concerns |
| 9  | Bessmertnyj et al., 2015 [24] | low<br>random generation random envelope                                          | Some concerns<br>no specific information                                | Some concerns<br>no specific information                   | Some concerns<br>no block in control, may be influenced | Some concerns<br>no information  | Some concerns |
| 10 | Blanco et al., 2015 [25]      | low<br>random number sealed envelopes                                             | low<br>both blinded                                                     | low<br>2/50 excluded before receiving intervention         | Some concerns<br>no specific information                | low<br>predefined outcomes       | Some concerns |
| 11 | Blanco et al., 2016 [26]      | Some concerns<br>no statement for allocation concealment internet software        | Some concerns<br>different PNB, no information about trial context      | low<br>no exclusion                                        | low<br>blinded                                          | low<br>predefined outcomes       | Some concerns |
| 12 | Bollag et al., 2012 [27]      | low<br>computer-generated number central allocation                               | low<br>both blinded                                                     | low<br>9/90 excluded due to block failure                  | low<br>blinded                                          | Some concerns<br>no information  | Some concerns |
| 13 | Canakci et al., 2018 [28]     | high<br>according to patient's preference                                         | Some concerns<br>different procedure no information about trial context | low<br>4/84 excluded due to block failure                  | low<br>objective data/self-reported                     | Some concerns<br>no information  | high          |
| 14 | Canovas et al., 2013 [29]     | Some concerns<br>no statement for allocation concealment random code              | Some concerns<br>different procedure no information about trial context | low<br>no exclusion                                        | low<br>blinded                                          | Some concerns<br>no information  | Some concerns |
| 15 | Chandon et al., 2014 [30]     | low<br>random number scratch card with block of 6                                 | Some concerns<br>different PNB no information about trial context       | high<br>10/39 and 5/41 dropped                             | low<br>blinded                                          | low<br>predefined outcomes       | high          |

|    |                             |               |                                                                                                 |               |                                                               |               |                                                  |               |                                        |               |                     |               |
|----|-----------------------------|---------------|-------------------------------------------------------------------------------------------------|---------------|---------------------------------------------------------------|---------------|--------------------------------------------------|---------------|----------------------------------------|---------------|---------------------|---------------|
| 16 | Corsini et al., 2013 [31]   | low           | computerized randomization central allocation                                                   | low           | both blinded                                                  | low           | 2/140 excluded                                   | low           | blinded                                | low           | predefined outcomes | low           |
| 17 | Costello et al., 2009 [32]  | Some concerns | no statement for allocation concealment random number table random                              | low           | both blinded                                                  | low           | 4/100 excluded                                   | low           | blinded                                | Some concerns | no information      | Some concerns |
| 18 | Demiraran et al., 2013 [33] | low           | number table sealed opaque envelopes                                                            | low           | both blinded                                                  | low           | no exclusion                                     | low           | blinded                                | Some concerns | no information      | Some concerns |
| 19 | Dereu et al., 2019 [34]     | low           | computerized randomization central allocation                                                   | low           | both blinded                                                  | low           | 16/182 dropped, unrelated to true value          | low           | blinded                                | low           | predefined outcomes | Some concerns |
| 20 | Ducarme et al., 2012 [35]   | low           | no statement for sequence generation sealed envelopes                                           | low           | both blinded                                                  | low           | no exclusion                                     | Some concerns | no specific information                | Some concerns | no information      | Some concerns |
| 21 | Eldaba et al., 2013 [36]    | low           | no statement for sequence generation central allocation                                         | low           | both blinded                                                  | low           | no exclusion                                     | low           | blinded                                | Some concerns | no information      | Some concerns |
| 22 | Eslamian et al., 2012 [37]  | Some concerns | no statement for allocation concealment computer-generated list                                 | low           | both blinded                                                  | low           | 2/50 excluded due to surgical complications      | Some concerns | no block in control, may be influenced | Some concerns | no information      | Some concerns |
| 23 | Fakor et al., 2014 [38]     | Some concerns | no statement for allocation concealment random block computerized random block sealed envelopes | Some concerns | no specific information                                       | low           | within pre-defined dropout range                 | Some concerns | no specific information                | low           | predefined outcomes | Some concerns |
| 24 | Fusco et al., 2016 [39]     | low           | random block sealed envelopes                                                                   | low           | both blinded                                                  | low           | no exclusion                                     | low           | blinded                                | low           | predefined outcomes | low           |
| 25 | Ganta et al., 1994 [40]     | Some concerns | no specific information                                                                         | Some concerns | different PNB no information about trial context              | Some concerns | no specific statement                            | Some concerns | no block in control, may be influenced | Some concerns | no information      | Some concerns |
| 26 | Gao et al., 2019 [41]       | Some concerns | no specific information                                                                         | Some concerns | no block in control group, no information about trial context | low           | 3/103 excluded due to loss of records            | Some concerns | no block in control, may be influenced | Some concerns | no information      | Some concerns |
| 27 | Givens et al., 2002 [42]    | low           | computer-generated randomization sealed packets                                                 | low           | both blinded                                                  | Some concerns | no specific information                          | low           | blinded                                | Some concerns | no information      | Some concerns |
| 28 | Hansen et al., 2019 [43]    | low           | computer-generated blocks, sealed opaque envelopes                                              | low           | both blinded                                                  | low           | 2/72 excluded due to surgical complications      | low           | blinded                                | low           | predefined outcomes | low           |
| 29 | Irwin et al., 2020 [44]     | low           | computer-generated number, numbered opaque envelopes                                            | low           | both blinded                                                  | low           | 1/45 and 3/45 excluded due to protocol violation | Some concerns | no specific information                | Some concerns | no information      | Some concerns |
| 30 | Jadon et al., 2018 [45]     | low           | random number sealed                                                                            | low           | both blinded                                                  | low           | 3/70 and 2/69 (1 due to                          | some          | no specific information                | low           | predefined outcomes | Some concerns |

|    |                                |               | opaque envelopes                                                                                                                                       |               | no procedure in the control, no information about trial context |               | complication) excluded                       | concerns      |                                        |               |                     |               |
|----|--------------------------------|---------------|--------------------------------------------------------------------------------------------------------------------------------------------------------|---------------|-----------------------------------------------------------------|---------------|----------------------------------------------|---------------|----------------------------------------|---------------|---------------------|---------------|
| 31 | Jolly et al., 2015 [46]        | low           | random number list sealed envelope                                                                                                                     | some concerns | the control, no information about trial context                 | low           | no exclusion                                 | Some concerns | no block in control, may be influenced | low           | predefined outcomes | Some concerns |
| 32 | Kagwa et al., 2015 [47]        | Some concerns | no specific information                                                                                                                                | low           | both blinded                                                    | some concerns | no specific information                      | Some concerns | no specific information                | Some concerns | no information      | Some concerns |
| 33 | Kainu et al., 2012 [48]        | Some concerns | no statement for allocation concealment random number computer-generated table, sealed opaque envelopes random                                         | Some concerns | no specific information                                         | low           | 6/66 excluded, unrelated reason with outcome | low           | blinded                                | Some concerns | no information      | Some concerns |
| 34 | Kanazi et al., 2010 [49]       | low           | computer-generated table, sealed opaque envelopes random                                                                                               | low           | both blinded                                                    | low           | within pre-defined dropout range             | low           | blinded                                | Some concerns | no information      | Some concerns |
| 35 | Kang et al., 2019 [50]         | Some concerns | sequence no statement for allocation concealment random                                                                                                | Some concerns | blinding patients only no information about trial context       | low           | within pre-defined dropout range             | Some concerns | no specific information                | low           | predefined outcomes | Some concerns |
| 36 | Kessous et al., 2012 [51]      | Some concerns | number no statement for allocation concealment computer-generated random table, closed envelopes random table                                          | low           | both blinded                                                    | low           | within pre-defined dropout range             | low           | blinded                                | low           | predefined outcomes | Some concerns |
| 37 | Kiran et al., 2017 [52]        | low           | computer-generated random table, closed envelopes random table                                                                                         | Some concerns | different PNB no information about trial context                | low           | no exclusion                                 | low           | blinded                                | Some concerns | no information      | Some concerns |
| 38 | Klasen et al., 2016 [53]       | Some concerns | no statement for allocation concealment blocks of 8 sealed opaque envelopes random                                                                     | Some concerns | different PNB no information about trial context                | low           | within pre-defined dropout range             | low           | blinded                                | low           | predefined outcomes | Some concerns |
| 39 | Krohg et al., 2018 [54]        | low           | sealed opaque envelopes random                                                                                                                         | low           | both blinded                                                    | low           | no exclusion                                 | low           | blinded                                | low           | predefined outcomes | low           |
| 40 | Kwikiriza et al., 2019 [55]    | Some concerns | generator no statement for allocation concealment random groups no statement for allocation concealment random                                         | low           | both blinded                                                    | low           | no exclusion                                 | low           | blinded                                | low           | predefined outcomes | Some concerns |
| 41 | Lalmand et al., 2017 [56]      | Some concerns | no statement for allocation concealment random                                                                                                         | low           | both blinded                                                    | low           | within pre-defined dropout range             | low           | blinded                                | low           | predefined outcomes | Some concerns |
| 42 | Lavand'homme et al., 2007 [57] | Some concerns | numbers no statement for allocation concealment random single block no statement for allocation concealment computer-generated table, sealed envelopes | low           | both blinded                                                    | low           | no exclusion                                 | low           | blinded                                | Some concerns | no information      | Some concerns |
| 43 | Lee et al., 2013 [58]          | Some concerns | block no statement for allocation concealment computer-generated table, sealed envelopes                                                               | low           | both blinded                                                    | low           | 1/50 excluded                                | low           | blinded                                | Some concerns | no information      | Some concerns |
| 44 | Loane et al., 2012 [59]        | low           | computer-generated table, sealed envelopes                                                                                                             | low           | both blinded                                                    | low           | 3/69 excluded due to protocol violation      | low           | blinded                                | low           | predefined outcomes | low           |

|    |                               |               |                                                                |               |                                                               |               |                                                       |               |                                        |               |                     |               |
|----|-------------------------------|---------------|----------------------------------------------------------------|---------------|---------------------------------------------------------------|---------------|-------------------------------------------------------|---------------|----------------------------------------|---------------|---------------------|---------------|
| 45 | Lui et al., 2017 [60]         | low           | random block of 6 numbered sealed opaque envelope              | Some concerns | blinded only in patient, no information about trial context   | low           | 38/40 enrolled in one group                           | low           | blinded                                | Some concerns | no information      | Some concerns |
| 46 | Magnani et al., 2006 [61]     | Some concerns | no specific information                                        | Some concerns | no specific information                                       | Some concerns | no specific information                               | Some concerns | no specific information                | Some concerns | no information      | Some concerns |
| 47 | Malawat et al., 2020 [62]     | low           | block randomization numbered sealed opaque envelopes           | Some concerns | different PNB no information about trial context              | low           | early terminated, but no exclusion after intervention | low           | blinded                                | low           | predefined outcomes | Some concerns |
| 48 | Mankikar et al., 2016 [63]    | low           | number table sealed envelopes                                  | low           | both blinded                                                  | low           | no exclusion                                          | low           | blinded                                | Some concerns | no information      | Some concerns |
| 49 | McKeen et al., 2014 [64]      | low           | random block table numbered sealed opaque envelopes            | low           | both blinded                                                  | low           | within pre-defined dropout range                      | low           | blinded                                | low           | predefined outcomes | low           |
| 50 | McMorrow et al., 2011 [65]    | low           | no statement for sequence generation central allocation random | low           | both blinded                                                  | low           | no exclusion                                          | low           | blinded                                | Some concerns | no information      | Some concerns |
| 51 | Mecklem et al., 1995 [66]     | low           | number table central allocation random                         | low           | both blinded                                                  | Some concerns | no specific information                               | low           | blinded                                | Some concerns | no information      | Some concerns |
| 52 | Mieszkowski et al., 2018 [67] | Some concerns | number table no statement for allocation concealment           | Some concerns | no block in control group no information about trial context  | low           | 2/60 excluded                                         | Some concerns | no block in control, may be influenced | Some concerns | no information      | Some concerns |
| 53 | Naghshineh et al., 2015 [68]  | Some concerns | no specific information                                        | Some concerns | no block in control group, no information about trial context | low           | no exclusion                                          | Some concerns | no block in control, may be influenced | Some concerns | no information      | Some concerns |
| 54 | Niklasson et al., 2012 [69]   | low           | random block sealed opaque envelopes                           | low           | both blinded                                                  | low           | within pre-defined dropout range                      | low           | blinded                                | low           | predefined outcomes | low           |
| 55 | O'Neill et al., 2012 [70]     | low           | computer-generated random number opaque envelopes              | Some concerns | different PNB no information about trial context              | low           | within pre-defined dropout range                      | low           | blinded                                | Some concerns | no information      | Some concerns |
| 56 | Patel et al., 2017 [71]       | low           | random number generator sealed envelopes                       | low           | both blinded                                                  | low           | within pre-defined dropout range                      | low           | blinded                                | low           | predefined outcomes | low           |
| 57 | Rackelboom et al., 2010 [72]  | low           | random number sealed opaque envelopes                          | low           | both blinded                                                  | low           | no exclusion                                          | low           | blinded                                | Some concerns | no information      | Some concerns |
| 58 | Reinikainen et al., 2014 [73] | low           | block randomization numbered sealed envelopes                  | low           | both blinded                                                  | low           | within pre-defined dropout range                      | low           | blinded                                | low           | predefined outcomes | low           |
| 59 | Salama et al., 2020 [74]      | low           | random number sealed                                           | Some concerns | no block in control group, no information                     | low           | no exclusion                                          | Some concerns | no specific information                | low           | predefined outcomes | Some concerns |

|    |                               |               |                                                                       |               |                                                               |               |                                                                |               |                                        |               |                     |               |
|----|-------------------------------|---------------|-----------------------------------------------------------------------|---------------|---------------------------------------------------------------|---------------|----------------------------------------------------------------|---------------|----------------------------------------|---------------|---------------------|---------------|
| 60 | Sekhavat et al., 2011 [75]    | low           | opaque envelopes<br>random number sealed opaque envelopes             | low           | both blinded                                                  | low           | within pre-defined dropout range                               | low           | blinded                                | Some concerns | no information      | Some concerns |
| 61 | Serifsoy et al., 2020 [76]    | low           | no statement for sequence generation sealed envelopes random          | Some concerns | no block in control group, no information about trial context | low           | no exclusion                                                   | Some concerns | no block in control, may be influenced | low           | predefined outcomes | Some concerns |
| 62 | Shahin et al., 2010 [77]      | low           | random number sealed opaque envelopes                                 | low           | both blinded                                                  | low           | within pre-defined dropout range                               | low           | blinded                                | Some concerns | no information      | Some concerns |
| 63 | Singh et al., 2013 [78]       | low           | random number table sealed opaque envelopes                           | low           | both blinded                                                  | low           | within pre-defined dropout range                               | low           | blinded                                | Some concerns | no information      | Some concerns |
| 64 | Srivastava et al., 2015 [79]  | low           | random number table sealed opaque envelopes                           | low           | both blinded                                                  | low           | within pre-defined dropout range                               | low           | blinded                                | Some concerns | no information      | Some concerns |
| 65 | Staker et al., 2018 [80]      | low           | computer-generated sequence sealed envelopes                          | low           | both blinded                                                  | low           | no exclusion                                                   | low           | blinded                                | Some concerns | no information      | Some concerns |
| 66 | Svirskii et al., 2012 [81]    | low           | no statement for sequence generation envelope technique randomization | Some concerns | no block in control group, no information about trial context | Some concerns | no specific information                                        | Some concerns | no block in control, may be influenced | Some concerns | no information      | Some concerns |
| 67 | Pavy et al., 1994 [82]        | Some concerns | table no statement for allocation concealment                         | low           | both blinded                                                  | low           | no exclusion                                                   | low           | blinded                                | Some concerns | no information      | Some concerns |
| 68 | Tamura et al., 2019 [83]      | Some concerns | computer-generated, no statement for allocation concealment           | low           | both blinded                                                  | low           | 30/176 excluded, even among the group, unrelated to true value | low           | blinded                                | low           | predefined outcomes | Some concerns |
| 69 | Tan et al., 2012 [84]         | low           | random number table sealed opaque envelopes                           | Some concerns | no block in control group, no information about trial context | low           | no exclusion                                                   | Some concerns | no block in control, may be influenced | Some concerns | no information      | Some concerns |
| 70 | Tawfik et al., 2017 [85]      | low           | random number table sealed opaque envelopes                           | Some concerns | different PNB no information about trial context              | low           | within pre-defined dropout range                               | low           | blinded                                | low           | predefined outcomes | Some concerns |
| 71 | Telnes et al., 2015 [86]      | low           | no statement for sequence generation central allocation               | Some concerns | different PNB no information about trial context              | low           | within pre-defined dropout range                               | low           | blinded                                | low           | predefined outcomes | Some concerns |
| 72 | Triyasunant et al., 2015 [87] | low           | block randomization sealed envelopes                                  | Some concerns | no block in control group, no information about trial context | low           | no exclusion                                                   | low           | blinded                                | low           | predefined outcomes | Some concerns |
| 73 | Trotter et al., 1991 [88]     | low           | no statement for sequence                                             | low           | both blinded                                                  | some          | no specific information                                        | low           | blinded                                | some          | no information      | some concerns |

|    |                                  |               |                                                                                                       |     |              |     |              |               |                         |               |                     |               |
|----|----------------------------------|---------------|-------------------------------------------------------------------------------------------------------|-----|--------------|-----|--------------|---------------|-------------------------|---------------|---------------------|---------------|
| 74 | Vallejo et al., 2012 [89]        | Some concerns | generation central allocation random table no statement for allocation concealment                    | low | both blinded | low | no exclusion | Some concerns | no specific information | Some concerns | no information      | Some concerns |
| 75 | Wagner-Kovacec et al., 2018 [90] | low           | no statement for sequence generation sealed envelopes random single block sequential sealed envelopes | low | both blinded | low | no exclusion | low           | blinded                 | low           | predefined outcomes | low           |
| 76 | Wolfson et al., 2012 [91]        | low           |                                                                                                       | low | both blinded | low | no exclusion | low           | blinded                 | Some concerns | no information      | Some concerns |

**Table S2.** Network diagnostic for Bayesian analysis.

| Outcome                                                            | Effect | Dbar    | pD     | DIC     | PSRF | I <sup>2</sup> (%) |
|--------------------------------------------------------------------|--------|---------|--------|---------|------|--------------------|
| Pain at rest 6 h after surgery                                     | Fixed  | 4804.71 | 108.52 | 4913.23 | 1.07 | 97%                |
|                                                                    | Random | 172.22  | 125.58 | 297.81  | 1.01 | 26%                |
| Postoperative cumulative 24 h morphine equivalent consumption (mg) | Fixed  | 1624.74 | 463.05 | 2087.79 | 1.7  | 94%                |
|                                                                    | Random | 95.22   | 87.89  | 183.11  | 1.01 | 3%                 |
| Pain at rest 24 h after surgery                                    | Fixed  | 1058.75 | 180.82 | 1239.58 | 1.15 | 88%                |
|                                                                    | Random | 131.65  | 124.09 | 255.74  | 1.02 | 3%                 |
| Dynamic pain at 6 h after surgery                                  | Fixed  | 2380.54 | 83.94  | 2463.49 | 1.1  | 97%                |
|                                                                    | Random | 83.11   | 82.75  | 165.86  | 1.02 | 1%                 |
| Dynamic pain 24 h after surgery                                    | Fixed  | 1044.79 | 82.13  | 1126.93 | 1.02 | 91%                |
|                                                                    | Random | 96.23   | 94.54  | 190.77  | 1.01 | 0.1%               |
| The time to first analgesic request (hours)                        | Fixed  | 778.62  | 92.80  | 871.41  | 1.02 | 94%                |
|                                                                    | Random | 50.65   | 49.56  | 100.21  | 1.01 | 1%                 |

Dbar: posterior mean of the deviance, pD: adequate number of parameters, DIC: deviance information criterion, sum of Dbar and PD, PRSF: Potential Scale Reduction Factor.

**Table S3.** Network league tables for all the postcesarean analgesic strategies regarding. (A) pain at 6 h after surgery and (B) postoperative cumulative 24 h morphine equivalent consumption (mg).

| (A)            |              |              |              |              |              |              |              |              |              |              |
|----------------|--------------|--------------|--------------|--------------|--------------|--------------|--------------|--------------|--------------|--------------|
| ITMP+I         |              |              |              |              |              |              |              |              |              |              |
| I-aTAP         |              |              |              |              |              |              |              |              |              |              |
| -4.60          | ITMP+II      |              |              |              |              |              |              |              |              |              |
| (-10.62,1.42)  | IH           |              |              |              |              |              |              |              |              |              |
| -6.54          | -1.94        | ITMP+I       |              |              |              |              |              |              |              |              |
| (-11.67,-1.41) | (-5.77,1.89) | TAP          |              |              |              |              |              |              |              |              |
| -6.10          | -1.50        | 0.44         | ITMP+R       |              |              |              |              |              |              |              |
| (-12.11,-0.09) | (-6.45,3.45) | (-3.36,4.24) | S            |              |              |              |              |              |              |              |
| -6.64          | -2.04        | -0.10        | -0.54        | ESP          |              |              |              |              |              |              |
| (-12.79,-0.48) | (-7.16,3.08) | (-4.04,3.85) | (-5.64,4.56) | ITMP+I       |              |              |              |              |              |              |
| -6.76          | -2.16        | -0.22        | -0.66        | -0.12        | PLA          |              |              |              |              |              |
| (-12.75,-0.77) | (-7.09,2.77) | (-4.00,3.56) | (-5.57,4.25) | (-5.21,4.96) | ITMP+p       |              |              |              |              |              |
| -7.36          | -2.76        | -0.82        | -1.26        | -0.73        | -0.60        | QL           |              |              |              |              |
| (-13.11,-1.61) | (-7.39,1.86) | (-4.15,2.50) | (-5.87,3.34) | (-5.34,3.88) | (-5.19,3.99) | ITMP         |              |              |              |              |
| -7.60          | -3.00        | -1.06        | -1.50        | -0.96        | -0.84        | -0.24        | apQL         |              |              |              |
| (-12.49,-2.70) | (-6.51,0.51) | (-2.59,0.46) | (-4.98,1.98) | (-4.69,2.76) | (-4.30,2.62) | (-3.25,2.78) | EDMP         |              |              |              |
| -7.52          | -2.92        | -0.98        | -1.42        | -0.88        | -0.76        | -0.15        | 0.08         | WC_bel       |              |              |
| (-13.51,-1.52) | (-7.84,2.01) | (-4.68,2.72) | (-6.32,3.49) | (-5.70,3.94) | (-5.64,4.13) | (-4.42,4.12) | (-3.37,3.54) | ow           |              |              |
| -7.62          | -3.02        | -1.08        | -1.52        | -0.98        | -0.86        | -0.26        | -0.02        | -0.10        | sITAP        |              |
| (-13.27,-1.97) | (-7.52,1.48) | (-4.19,2.03) | (-6.00,2.96) | (-5.34,3.38) | (-5.32,3.60) | (-4.06,3.55) | (-2.84,2.80) | (-3.37,3.16) | WC_bel       |              |
| -7.83          | -3.23        | -1.29        | -1.73        | -1.20        | -1.07        | -0.47        | -0.23        | -0.32        | -0.21        | ow           |
| (-13.11,-2.55) | (-7.26,0.79) | (-3.65,1.07) | (-5.73,2.27) | (-5.01,2.62) | (-5.05,2.91) | (-3.76,2.83) | (-2.20,1.74) | (-3.74,3.11) | (-2.77,2.34) | sITAP        |
| -7.66          | -3.07        | -1.13        | -1.57        | -1.03        | -0.91        | -0.30        | -0.07        | -0.15        | -0.05        | 0.17         |
| (-13.91,-1.42) | (-8.29,2.16) | (-5.21,2.96) | (-6.77,3.64) | (-6.10,4.05) | (-6.10,4.29) | (-4.99,4.38) | (-3.94,3.81) | (-5.03,4.73) | (-4.48,4.39) | (-3.76,4.09) |

|                |                |               |               |              |              |              |               |              |              |               |              |               |              |              |               |              |              |              |              |              |              |              |              |     |
|----------------|----------------|---------------|---------------|--------------|--------------|--------------|---------------|--------------|--------------|---------------|--------------|---------------|--------------|--------------|---------------|--------------|--------------|--------------|--------------|--------------|--------------|--------------|--------------|-----|
| -8.14          | -3.54          | -1.60         | -2.04         | -1.50        | -1.38        | -0.77        | -0.54         | -0.62        | -0.52        | -0.30         | -0.47        |               |              |              |               |              |              |              |              |              |              |              |              |     |
| (-13.22,-3.05) | (-7.31,0.23)   | (-3.49,0.29)  | (-5.78,1.71)  | (-4.96,1.96) | (-5.10,2.35) | (-3.82,2.27) | (-1.91,0.84)  | (-3.97,2.73) | (-3.17,2.13) | (-1.90,1.29)  | (-4.18,3.24) | ITAP          |              |              |               |              |              |              |              |              |              |              |              |     |
| -8.48          | -3.88          | -1.94         | -2.38         | -1.84        | -1.72        | -1.12        | -0.88         | -0.96        | -0.86        | -0.65         | -0.82        | -0.34         |              |              |               |              |              |              |              |              |              |              |              |     |
| (-13.96,-3.00) | (-8.17,0.41)   | (-4.73,0.85)  | (-6.65,1.89)  | (-5.97,2.28) | (-5.97,2.53) | (-4.72,2.48) | (-3.35,1.59)  | (-4.81,2.88) | (-4.13,2.41) | (-3.19,1.89)  | (-4.98,3.35) | (-2.58,1.90)  | WC_above     |              |               |              |              |              |              |              |              |              |              |     |
| -8.58          | -3.98          | -2.04         | -2.48         | -1.94        | -1.82        | -1.22        | -0.98         | -1.06        | -0.96        | -0.75         | -0.91        | -0.44         | -0.10        |              |               |              |              |              |              |              |              |              |              |     |
| (-13.81,-3.35) | (-7.94,-0.02)  | (-4.32,0.24)  | (-6.42,1.46)  | (-5.81,1.93) | (-5.73,2.10) | (-4.26,1.83) | (-2.81,0.85)  | (-4.24,2.11) | (-3.57,1.65) | (-2.81,1.32)  | (-4.86,3.03) | (-2.17,1.28)  | (-2.65,2.45) | pQL          |               |              |              |              |              |              |              |              |              |     |
| -8.66          | -4.06          | -2.13         | -2.57         | -2.03        | -1.91        | -1.30        | -1.07         | -1.15        | -1.05        | -0.83         | -1.00        | -0.53         | -0.18        | -0.09        |               |              |              |              |              |              |              |              |              |     |
| (-13.86,-3.47) | (-7.98,-0.15)  | (-4.29,0.04)  | (-6.45,1.32)  | (-5.74,1.68) | (-5.77,1.96) | (-4.45,1.85) | (-2.79,0.66)  | (-4.58,2.28) | (-3.82,1.73) | (-2.68,1.01)  | (-4.47,2.47) | (-1.85,0.79)  | (-2.50,2.13) | (-1.96,1.79) | WI            |              |              |              |              |              |              |              |              |     |
| -8.85          | -4.25          | -2.31         | -2.75         | -2.22        | -2.09        | -1.49        | -1.25         | -1.34        | -1.23        | -1.02         | -1.19        | -0.72         | -0.37        | -0.27        | -0.19         |              |              |              |              |              |              |              |              |     |
| (-14.33,-3.38) | (-8.54,0.03)   | (-5.20,0.58)  | (-7.01,1.51)  | (-6.68,2.25) | (-6.34,2.15) | (-5.38,2.40) | (-3.71,1.20)  | (-5.57,2.90) | (-4.97,2.51) | (-4.17,2.13)  | (-5.77,3.40) | (-3.53,2.10)  | (-3.86,3.11) | (-3.34,2.79) | (-3.19,2.82)  | pTAP         |              |              |              |              |              |              |              |     |
| -8.84          | -4.24          | -2.30         | -2.74         | -2.20        | -2.08        | -1.47        | -1.24         | -1.32        | -1.22        | -1.01         | -1.17        | -0.70         | -0.36        | -0.26        | -0.17         | 0.02         |              |              |              |              |              |              |              |     |
| (-14.45,-3.22) | (-8.70,0.22)   | (-5.35,0.75)  | (-7.18,1.70)  | (-6.53,2.13) | (-6.50,2.34) | (-5.22,2.28) | (-3.99,1.52)  | (-4.57,1.93) | (-4.09,1.66) | (-3.76,1.75)  | (-5.56,3.21) | (-3.30,1.89)  | (-3.55,2.84) | (-2.80,2.29) | (-2.86,2.52)  | (-3.67,3.70) | aQL          |              |              |              |              |              |              |     |
| -8.86          | -4.26          | -2.32         | -2.76         | -2.22        | -2.10        | -1.49        | -1.26         | -1.34        | -1.24        | -1.03         | -1.19        | -0.72         | -0.38        | -0.28        | -0.19         | -0.00        | -0.02        |              |              |              |              |              |              |     |
| (-14.31,-3.40) | (-8.52,0.00)   | (-5.06,0.42)  | (-6.99,1.48)  | (-6.28,1.84) | (-6.31,2.12) | (-5.08,2.09) | (-3.67,1.16)  | (-5.18,2.49) | (-4.49,2.02) | (-3.53,1.48)  | (-5.35,2.97) | (-2.83,1.39)  | (-3.26,2.51) | (-2.82,2.26) | (-2.49,2.10)  | (-3.45,3.44) | (-3.21,3.17) | IIH          |              |              |              |              |              |     |
| -8.97          | -4.37          | -2.43         | -2.87         | -2.33        | -2.21        | -1.61        | -1.37         | -1.45        | -1.35        | -1.14         | -1.30        | -0.83         | -0.49        | -0.39        | -0.30         | -0.12        | -0.13        | -0.11        |              |              |              |              |              |     |
| (-14.97,-2.97) | (-9.30,0.57)   | (-6.13,1.27)  | (-7.79,2.05)  | (-7.11,2.44) | (-7.11,2.69) | (-5.96,2.75) | (-4.84,2.10)  | (-6.01,3.11) | (-5.44,2.74) | (-4.67,2.39)  | (-6.14,3.53) | (-4.12,2.45)  | (-4.28,3.30) | (-3.93,3.15) | (-3.68,3.07)  | (-4.37,4.13) | (-4.16,3.90) | (-3.30,3.08) | aTAP         |              |              |              |              |     |
| -9.19          | -4.59          | -2.65         | -3.09         | -2.55        | -2.43        | -1.83        | -1.59         | -1.67        | -1.57        | -1.36         | -1.52        | -1.05         | -0.71        | -0.61        | -0.52         | -0.34        | -0.35        | -0.33        | -0.22        |              |              |              |              |     |
| (-14.81,-3.57) | (-9.06,-0.12)  | (-5.70,0.40)  | (-7.54,1.36)  | (-6.85,1.75) | (-6.86,2.00) | (-5.63,1.98) | (-4.35,1.17)  | (-5.71,2.37) | (-5.07,1.93) | (-4.19,1.47)  | (-5.80,2.75) | (-3.60,1.49)  | (-3.85,2.43) | (-3.45,2.23) | (-3.03,1.98)  | (-4.03,3.36) | (-3.78,3.07) | (-3.47,2.81) | (-4.21,3.77) | IIN          |              |              |              |     |
| -9.78          | -5.18          | -3.24         | -3.68         | -3.14        | -3.02        | -2.42        | -2.18         | -2.26        | -2.16        | -1.95         | -2.11        | -1.64         | -1.30        | -1.20        | -1.11         | -0.93        | -0.94        | -0.92        | -0.81        | -0.59        |              |              |              |     |
| (-15.43,-4.13) | (-9.69,-0.67)  | (-6.35,-0.13) | (-8.16,0.80)  | (-7.49,1.20) | (-7.49,1.45) | (-6.27,1.43) | (-5.00,0.64)  | (-6.34,1.81) | (-5.71,1.38) | (-4.84,0.94)  | (-6.50,2.27) | (-4.27,0.98)  | (-4.48,1.89) | (-4.10,1.69) | (-3.80,1.57)  | (-4.67,2.82) | (-4.42,2.53) | (-4.11,2.27) | (-4.84,3.22) | (-4.01,2.83) | TFP          |              |              |     |
| -10.10         | -5.50          | -3.56         | -4.00         | -3.46        | -3.34        | -2.74        | -2.50         | -2.58        | -2.48        | -2.27         | -2.43        | -1.96         | -1.62        | -1.52        | -1.43         | -1.25        | -1.26        | -1.24        | -1.13        | -0.91        | -0.32        |              |              |     |
| (-16.11,-4.09) | (-10.45,-0.55) | (-7.37,0.25)  | (-7.48,-0.52) | (-8.57,1.65) | (-8.26,1.58) | (-7.35,1.88) | (-6.00,1.00)  | (-7.50,2.33) | (-6.97,2.01) | (-6.28,1.74)  | (-7.65,2.78) | (-5.72,1.79)  | (-5.90,2.66) | (-5.47,2.43) | (-5.33,2.46)  | (-5.52,3.02) | (-5.71,3.19) | (-5.49,3.00) | (-6.06,3.79) | (-5.37,3.55) | (-4.81,4.17) | RS           |              |     |
| -9.78          | -5.18          | -3.24         | -3.68         | -3.14        | -3.02        | -2.42        | -2.18         | -2.26        | -2.16        | -1.95         | -2.11        | -1.64         | -1.30        | -1.20        | -1.11         | -0.93        | -0.94        | -0.92        | -0.81        | -0.59        | -0.00        | 0.32         |              |     |
| (-14.87,-4.69) | (-8.96,-1.40)  | (-5.15,-1.33) | (-7.44,0.08)  | (-6.73,0.45) | (-6.75,0.71) | (-5.39,0.55) | (-3.59,-0.77) | (-5.52,1.00) | (-4.72,0.40) | (-3.47,-0.42) | (-5.75,1.52) | (-2.58,-0.71) | (-3.34,0.74) | (-2.74,0.34) | (-2.21,-0.02) | (-3.76,1.90) | (-3.40,1.12) | (-2.97,1.39) | (-4.01,2.80) | (-2.98,1.45) | (-2.45,2.45) | (-3.45,4.01) | Con          |     |
| -10.25         | -5.65          | -3.71         | -4.15         | -3.61        | -3.49        | -2.89        | -2.65         | -2.73        | -2.63        | -2.42         | -2.59        | -2.11         | -1.77        | -1.67        | -1.59         | -1.40        | -1.41        | -1.39        | -1.28        | -1.06        | -0.47        | -0.15        | -0.47        |     |
| (-15.91,-4.59) | (-10.17,-1.13) | (-6.84,-0.58) | (-8.65,0.35)  | (-7.97,0.75) | (-7.97,0.99) | (-6.75,0.98) | (-5.50,0.20)  | (-6.83,1.36) | (-6.19,0.93) | (-5.33,0.49)  | (-6.98,1.81) | (-4.76,0.53)  | (-4.98,1.43) | (-4.59,1.25) | (-4.29,1.12)  | (-5.16,2.36) | (-4.90,2.08) | (-4.60,1.82) | (-5.33,2.76) | (-4.50,2.38) | (-3.95,3.01) | (-4.66,4.36) | (-2.95,2.01) | IQL |
| (B)            |                |               |               |              |              |              |               |              |              |               |              |               |              |              |               |              |              |              |              |              |              |              |              |     |

|                                                                                                                                                                             |  |  |  |  |  |  |  |  |  |  |
|-----------------------------------------------------------------------------------------------------------------------------------------------------------------------------|--|--|--|--|--|--|--|--|--|--|
| ITMP+II-                                                                                                                                                                    |  |  |  |  |  |  |  |  |  |  |
| aTAP                                                                                                                                                                        |  |  |  |  |  |  |  |  |  |  |
| -6.20                                                                                                                                                                       |  |  |  |  |  |  |  |  |  |  |
| (-28.30,15.91) IQL                                                                                                                                                          |  |  |  |  |  |  |  |  |  |  |
| -7.37 -1.18                                                                                                                                                                 |  |  |  |  |  |  |  |  |  |  |
| (-28.81,14.06)(-22.71,20.36) ITMP+RS                                                                                                                                        |  |  |  |  |  |  |  |  |  |  |
| -7.97 -1.77 -0.59                                                                                                                                                           |  |  |  |  |  |  |  |  |  |  |
| (-29.74,13.81)(-23.64,20.10)(-21.80,20.61) ITMP+WI                                                                                                                          |  |  |  |  |  |  |  |  |  |  |
| -8.72 -2.52 -1.34 -0.75                                                                                                                                                     |  |  |  |  |  |  |  |  |  |  |
| (-30.15,12.72)(-24.05,19.01)(-22.19,19.51)(-21.95,20.45) ITMP+IPL                                                                                                           |  |  |  |  |  |  |  |  |  |  |
| A                                                                                                                                                                           |  |  |  |  |  |  |  |  |  |  |
| -8.26 -2.07 -0.89 -0.30 0.45                                                                                                                                                |  |  |  |  |  |  |  |  |  |  |
| (-34.93,18.40)(-27.28,23.14)(-27.09,25.31)(-26.77,26.18)(-25.74,26.65) IIIH                                                                                                 |  |  |  |  |  |  |  |  |  |  |
| -10.71 -4.51 -3.34 -2.74 -1.99 -2.45                                                                                                                                        |  |  |  |  |  |  |  |  |  |  |
| (-26.27,4.85)(-20.21,11.18)(-18.08,11.49)(-17.98,12.74)(-16.73,12.74)(-24.10,19.21) ITMP                                                                                    |  |  |  |  |  |  |  |  |  |  |
| -12.00 -5.81 -4.63 -4.03 -3.28 -3.74 -1.29                                                                                                                                  |  |  |  |  |  |  |  |  |  |  |
| (-29.17,5.17)(-19.81,8.20)(-21.06,11.84)(-20.91,12.14)(-19.71,13.37)(-24.85,17.37)(-8.55,5.97) ITAP                                                                         |  |  |  |  |  |  |  |  |  |  |
| -11.62 -5.42 -4.25 -3.65 -2.90 -3.36 -0.91 0.38                                                                                                                             |  |  |  |  |  |  |  |  |  |  |
| (-30.87,7.63)(-24.79,13.94)(-22.85,14.35)(-22.64,15.34)(-21.50,15.69)(-27.80,21.08)(-12.25,10.43)(-13.08,13.84) ITMP+III                                                    |  |  |  |  |  |  |  |  |  |  |
| H                                                                                                                                                                           |  |  |  |  |  |  |  |  |  |  |
| -13.19 -7.00 -5.82 -5.22 -4.48 -4.93 -2.48 -1.19 -1.57                                                                                                                      |  |  |  |  |  |  |  |  |  |  |
| (-37.41,11.03)(-29.68,15.68)(-29.52,17.89)(-29.24,18.79)(-28.18,19.22)(-31.51,21.65)(-21.04,16.08)(-19.14,16.76)(-23.32,20.18) EDMF                                         |  |  |  |  |  |  |  |  |  |  |
| -12.82 -6.62 -5.44 -4.85 -4.10 -4.55 -2.11 -0.82 -1.20 0.37                                                                                                                 |  |  |  |  |  |  |  |  |  |  |
| (-35.73,10.09)(-29.63,16.38)(-27.81,16.92)(-27.54,17.84)(-26.46,18.26)(-31.97,22.86)(-18.92,14.71)(-19.13,17.50)(-21.48,19.09)(-24.67,25.42) ITMP+IT                        |  |  |  |  |  |  |  |  |  |  |
| AP                                                                                                                                                                          |  |  |  |  |  |  |  |  |  |  |
| -14.59 -8.40 -7.22 -6.62 -5.88 -6.33 -3.88 -2.59 -2.97 -1.40 -1.77                                                                                                          |  |  |  |  |  |  |  |  |  |  |
| (-38.81,9.63)(-31.08,14.49)(-30.93,16.39)(-30.64,17.83)(-29.58,17.25)(-32.91,20.68)(-22.45,14.37)(-20.55,15.37)(-24.72,18.78)(-16.16,13.36)(-26.82,23.28) apQL              |  |  |  |  |  |  |  |  |  |  |
| -15.47 -9.28 -8.10 -7.50 -6.76 -7.21 -4.76 -3.47 -3.85 -2.28 -2.65 -0.88                                                                                                    |  |  |  |  |  |  |  |  |  |  |
| (-38.70,7.75)(-30.93,12.59)(-30.78,14.50)(-30.51,15.93)(-29.44,15.47)(-32.89,18.48)(-22.00,12.13)(-20.07,13.48)(-24.48,16.78)(-16.72,12.16)(-26.74,21.43)(-15.32,13.56) aQL |  |  |  |  |  |  |  |  |  |  |

|             |             |             |             |             |             |             |            |            |            |            |            |            |            |            |            |            |            |            |            |     |
|-------------|-------------|-------------|-------------|-------------|-------------|-------------|------------|------------|------------|------------|------------|------------|------------|------------|------------|------------|------------|------------|------------|-----|
| -15.51      | -9.31       | -8.14       | -7.54       | -6.79       | -7.25       | -4.80       | -3.51      | -3.89      | -2.32      | -2.69      | -0.92      | -0.04      |            |            |            |            |            |            |            |     |
| (-35.78,4.7 | (-27.64,9.0 | (-27.79,11. | (-27.56,12. | (-26.44,12. | (-30.27,15. | (-17.79,8.1 | (-15.58,8. | (-21.13,13 | (-22.46,17 | (-23.94,18 | (-21.06,19 | (-18.97,18 | TFP        |            |            |            |            |            |            |     |
| 6)          | 1)          | 51)         | 47)         | 85)         | 77)         | 9)          | 56)        | .35)       | .82)       | .55)       | .22)       | .89)       |            |            |            |            |            |            |            |     |
| -15.41      | -9.22       | -8.04       | -7.45       | -6.70       | -7.15       | -4.70       | -3.41      | -3.79      | -2.22      | -2.59      | -0.82      | 0.06       | 0.10       |            |            |            |            |            |            |     |
| (-32.88,2.0 | (-24.52,6.0 | (-24.78,8.7 | (-24.62,9.7 | (-23.43,10. | (-28.23,13. | (-12.64,3.2 | (-9.92,3.0 | (-17.63,10 | (-20.12,15 | (-21.19,16 | (-18.72,17 | (-16.47,16 | (-11.91,12 | WI         |            |            |            |            |            |     |
| 5)          | 9)          | 1)          | 3)          | 04)         | 93)         | 4)          | 9)         | .05)       | .68)       | .00)       | .08)       | .59)       | .11)       |            |            |            |            |            |            |     |
| -16.84      | -10.64      | -9.47       | -8.87       | -8.12       | -8.58       | -6.13       | -4.84      | -5.22      | -3.65      | -4.02      | -2.25      | -1.37      | -1.33      | -1.43      |            |            |            |            |            |     |
| (-35.59,1.9 | (-29.51,8.2 | (-27.54,8.6 | (-27.35,9.6 | (-26.20,9.9 | (-32.62,15. | (-16.59,4.3 | (-17.57,7. | (-20.64,10 | (-24.95,17 | (-23.83,15 | (-23.56,19 | (-21.53,18 | (-18.00,15 | (-14.56,11 | pTAP       |            |            |            |            |     |
| 1)          | 2)          | 1)          | 1)          | 5)          | 47)         | 3)          | 89)        | .21)       | .66)       | .78)       | .06)       | .80)       | .34)       | .70)       |            |            |            |            |            |     |
| -17.37      | -11.18      | -10.00      | -9.41       | -8.66       | -9.11       | -6.66       | -5.37      | -5.75      | -4.18      | -4.56      | -2.78      | -1.90      | -1.86      | -1.96      | -0.53      |            |            |            |            |     |
| (-38.81,4.0 | (-32.72,10. | (-24.75,4.7 | (-30.61,11. | (-29.51,12. | (-35.31,17. | (-21.41,8.0 | (-21.82,11 | (-24.36,12 | (-27.89,19 | (-26.93,17 | (-26.49,20 | (-24.59,20 | (-21.52,17 | (-18.71,14 | (-18.62,17 | RS         |            |            |            |     |
| 7)          | 36)         | 5)          | 80)         | 19)         | 09)         | 9)          | .07)       | .85)       | .53)       | .81)       | .93)       | .79)       | .79)       | .79)       | .55)       |            |            |            |            |     |
| -18.73      | -12.53      | -11.35      | -10.76      | -10.01      | -10.46      | -8.02       | -6.73      | -7.11      | -5.54      | -5.91      | -4.14      | -3.25      | -3.22      | -3.31      | -1.89      | -1.35      |            |            |            |     |
| (-36.26,-1. | (-27.93,2.8 | (-28.17,5.4 | (-28.01,6.4 | (-26.82,6.8 | (-31.72,10. | (-16.10,0.0 | (-13.47,0. | (-21.03,6. | (-23.68,12 | (-24.57,12 | (-22.29,14 | (-20.07,13 | (-15.54,9. | (-10.96,4. | (-15.11,11 | (-18.18,15 | WC_belo    |            |            |     |
| 19)         | 7)          | 7)          | 9)          | 0)          | 80)         | 7)          | 02)        | 82)        | .61)       | .75)       | .02)       | .56)       | 11)        | 33)        | .33)       | .47)       | w          |            |            |     |
| -20.11      | -13.91      | -12.74      | -12.14      | -11.39      | -11.85      | -9.40       | -8.11      | -8.49      | -6.92      | -7.29      | -5.52      | -4.64      | -4.60      | -4.70      | -3.27      | -2.74      | -1.38      |            |            |     |
| (-40.05,-0. | (-31.91,4.0 | (-32.05,6.5 | (-31.83,7.5 | (-30.70,7.9 | (-34.59,10. | (-21.87,3.0 | (-19.64,3. | (-25.34,8. | (-21.36,7. | (-28.23,13 | (-19.96,8. | (-18.08,8. | (-19.32,10 | (-16.15,6. | (-19.55,13 | (-22.05,16 | (-13.19,10 | pQL        |            |     |
| 17)         | 8)          | 7)          | 4)          | 1)          | 89)         | 7)          | 42)        | 36)        | 52)        | .64)       | 92)        | 80)        | .12)       | 76)        | .00)       | .58)       | .42)       |            |            |     |
| -21.50      | -15.30      | -14.12      | -13.53      | -12.78      | -13.24      | -10.79      | -9.50      | -9.88      | -8.31      | -8.68      | -6.91      | -6.03      | -5.99      | -6.09      | -4.66      | -4.12      | -2.77      | -1.39      |            |     |
| (-41.89,-1. | (-33.75,3.1 | (-33.90,5.6 | (-33.67,6.6 | (-32.55,6.9 | (-36.36,9.8 | (-23.97,2.3 | (-21.76,2. | (-27.26,7. | (-28.58,11 | (-30.05,12 | (-27.19,13 | (-25.11,13 | (-21.31,9. | (-18.30,6. | (-21.48,12 | (-23.91,15 | (-15.29,9. | (-16.28,13 | WC_abov    |     |
| 11)         | 4)          | 5)          | 1)          | 9)          | 9)          | 9)          | 77)        | 51)        | .97)       | .69)       | .38)       | .06)       | 33)        | 13)        | .66)       | .75)       | .51)       | e          |            |     |
| -27.26      | -21.07      | -19.89      | -19.30      | -18.55      | -19.00      | -16.55      | -15.26     | -15.64     | -14.07     | -14.45     | -12.67     | -11.79     | -11.75     | -11.85     | -10.42     | -9.89      | -8.54      | -7.15      | -5.76      |     |
| (-44.47,-1  | (-35.91,-6. | (-36.36,-3. | (-36.21,-2. | (-35.01,-2. | (-39.37,1.3 | (-23.89,-9. | (-20.80,-9 | (-29.15,-2 | (-31.14,3. | (-32.79,3. | (-29.75,4. | (-27.43,3. | (-22.47,-1 | (-17.28,-6 | (-23.20,2. | (-26.37,6. | (-14.62,-2 | (-17.25,2. | (-16.71,5. | Con |
| 0.06)       | 22)         | 42)         | 39)         | 08)         | 7)          | 21)         | .72)       | .14)       | 00)        | 90)        | 40)        | 85)        | .03)       | .42)       | 35)        | 59)        | .45)       | 95)        | 18)        |     |

Estimates are presented as mean difference (95% confidence interval). Abbreviations: ITMP = intrathecal morphine; EDMP = epidural morphine; ESP = erector spinae plane block; TFP = transverse fascial plane block; AQL = anterior quadratus lumborum block; pQL = posterior QL; apQL = combined anterior and posterior quadratus lumborum block; IQL = lateral QL block; ITAP = lateral TAP block; pTAP = posterior TAP block; slTAP=combined subcostal and lateral TAP block; Il-aTAP = combined ilioinguinal and anterior TAP block; IIIH = ilioinguinal-iliohypogastric block; IIN = ilioinguinal nerve block; RS=rectus sheath block; IPLA = intraperitoneal local anesthetics instillation; WC\_below = wound continuous infusion below the fascia; WC\_above = wound continuous infusion above the fascia; WI = wound infiltration; Con = control.
